# Supplementary material for: Single Cell Analysis of Blood Mononuclear Cells Stimulated Through Either LPS or Anti-CD3 and Anti-CD28
Source: Front Immunol. 2021 Mar 17;12:636720. doi: 10.3389/fimmu.2021.636720 (PMC8010670; doi:10.3389/fimmu.2021.636720)
Supplement: Supplementary file 1 [file Table_1.XLSX]

## Sheet: Legend
Table S1: Table containing information for the 39 antibodies used in our CITE-seq panel (first sheet). In the second sheet, information regarding the cell hashing oligonucleotides (HTOs) used to multiplex treatment information.

## Sheet: ADT
Antibody	Reactive	CITE-seq barcode	Supplier	Note
control_rIgG2a	Mouse	TAAGCCGTTCGG	BioLegend, USA	Negative controls, not used in analysis
control_mIgG	Mouse	CATGATTGGCTC	BioLegend, USA	Negative controls, not used in analysis
control_mIgG2a	Mouse	GAGGCGATTGAT	BioLegend, USA	Negative controls, not used in analysis
control_mIgG1	Mouse	TGTCCGGCAATA	BioLegend, USA	Negative controls, not used in analysis
control_mIgG2a_2	Mouse	TGGTGAACCTGG	BioLegend, USA	Negative controls, not used in analysis
control_mIgG2b	Mouse	GATCGTAATACC	BioLegend, USA	Negative controls, not used in analysis
control_mIgM	Mouse	AAGCGCTTGGCA	BioLegend, USA	Negative controls, not used in analysis
control_mIgG2b_2	Mouse	CATCGGTGTACA	BioLegend, USA	Negative controls, not used in analysis
control_mIgG1_2	Mouse	GTCTAGACTTCG	BioLegend, USA	Negative controls, not used in analysis
CD3	Human	CTCATTGTAACTCCT	BioLegend, USA
CD56	Human	TCCTTTCCTGATAGG	BioLegend, USA
CD19	Human	CTGGGCAATTACTCG	BioLegend, USA
CD11c	Human	TACGCCTATAACTTG	BioLegend, USA
CD34	Human	GCAGAAATCTCCCTT	BioLegend, USA
CD45RA	Human	TCAATCCTTCCGCTT	BioLegend, USA
CD4	Human	TGTTCCCGCTCAACT	BioLegend, USA
CD8a	Human	GCTGCGCTTTCCATT	BioLegend, USA
CD14	Human	TCTCAGACCTCCGTA	BioLegend, USA
CD16	Human	AAGTTCACTCTTTGC	BioLegend, USA
CD25	Human	TTTGTCCTGTACGCC	BioLegend, USA
CD45RO	Human	CTCCGAATCATGTTG	BioLegend, USA
CD183_CXCR3	Human	GCGATGGTAGATTAT	BioLegend, USA
CD185	Human	AATTCAACCGTCGCC	BioLegend, USA
CD69	Human	GTCTCTTGGCTTAAA	BioLegend, USA
CD197_CCR7	Human	AGTTCAGTCAACCGA	BioLegend, USA
CD161	Human	GTACGCAGTCCTTCT	BioLegend, USA
CD27	Human	GCACTCCTGCATGTA	BioLegend, USA
HLA-DR	Human	AATAGCGAGCAAGTA	BioLegend, USA
CD57	Human	AACTCCCTATGGAGG	BioLegend, USA
CD278_ICOS	Human	CGCGCACCCATTAAA	BioLegend, USA
CD24	Human	AGATTCCTTCGTGTT	BioLegend, USA
CD11a	Human	TATATCCTTGTGAGC	BioLegend, USA
CD79b_IgB	Human	ATTCTTCAACCGAAG	BioLegend, USA
CD123	Human	CTTCACTCTGTCAGG	BioLegend, USA
CD38	Human	ATCCTTTGCCGTGTT	BioLegend, USA
CD127_IL7Ra	Human	GGCACCCATGTCTTT	BioLegend, USA
CD28	Human	ATTCTGTCTTTCCCA	BioLegend, USA
CD235	Human	GCTCCTTTACACGTA	BioLegend, USA
CD279_PD1	Human	ACAGCGCCGTATTTA	BioLegend, USA
CD20	Human	TTCTGGGTCCCTAGA	BioLegend, USA
CD21	Human	AACCTAGTAGTTCGG	BioLegend, USA
IgD	Human	CGTCACCTCTGTATC	BioLegend, USA
CD22	Human	AAGTCACCCGCTTTA	BioLegend, USA
CD66ace	Human	GGGACAGTTCGTTTC	BioLegend, USA
CD194_CCR4	Human	AGCTTACCTGCACGA	BioLegend, USA
CD185_CXCR5	Human	AATTCAACCGTCGCC	BioLegend, USA
IgM	Human	TAGCGAGCCCGTATA	BioLegend, USA
CD196_CCR6	Human	GATCCCTTTGTCACT	BioLegend, USA
CD195_CCR5	Human	CCAAAGTAAGAGCCA	BioLegend, USA

## Sheet: HTO
Treatment	ID_Name	Antibody	CITE-seq barcode	Supplier	Note
Baseline	control	B2M/ATP1B3	GTCAACTCTTTAGCG	BioLegend, USA
Anti-CD3/CD28	Tcell	B2M/ATP1B3	TTCCGCCTCTCTTTG	BioLegend, USA
LPS	Mono	B2M/ATP1B3	AGTAAGTTCAGCGTA	BioLegend, USA
