# Supplementary material for: Single Cell Analysis of Blood Mononuclear Cells Stimulated Through Either LPS or Anti-CD3 and Anti-CD28
Source: Front Immunol. 2021 Mar 17;12:636720. doi: 10.3389/fimmu.2021.636720 (PMC8010670; doi:10.3389/fimmu.2021.636720)
Supplement: Supplementary file 2 [file Table_2.XLSX]

## Sheet: Legend
Table S2: Table containing the sequencing quality control information for RNA-seq (first sheet), cell hashing (second sheet), and protein quantification (third sheet). All sequencing data was generated using the 10X Genomics platform.

## Sheet: RNA_QC
	Estimated Number of Cells	Mean Reads per Cell	Median Genes per Cell	Number of Reads	Valid Barcodes	Sequencing Saturation	Q30 Bases in Barcode	Q30 Bases in RNA Read	Q30 Bases in UMI	Reads Mapped to Genome	Reads Mapped Confidently to Genome	Reads Mapped Confidently to Intergenic Regions	Reads Mapped Confidently to Intronic Regions	Reads Mapped Confidently to Exonic Regions	Reads Mapped Confidently to Transcriptome	Reads Mapped Antisense to Gene	Fraction Reads in Cells	Total Genes Detected	Median UMI Counts per Cell
1-RNA	12934	155254	1057	2008061202	0.974	0.938	0.954	0.857	0.954	0.885	0.859	0.035	0.149	0.676	0.626	0.011	0.818	21788	2581
2-RNA	12514	172257	1243	2155630859	0.982	0.931	0.954	0.856	0.954	0.891	0.865	0.036	0.156	0.673	0.623	0.012	0.821	22460	3230
3-RNA	12465	158300	1046	1973212928	0.974	0.94	0.953	0.859	0.954	0.892	0.866	0.034	0.146	0.686	0.636	0.01	0.824	21882	2581
4-RNA	13648	137112	901	1871317715	0.974	0.941	0.953	0.86	0.954	0.89	0.864	0.034	0.145	0.685	0.635	0.01	0.839	21730	2138
5-RNA	12755	184752	882	2356513106	1.031	0.956	0.951	0.855	0.952	1.085	1.054	0.044	0.185	0.825	0.762	0.012	0.833	21552	2120
6-RNA	12738	196054	944	2497346325	1.036	0.954	0.954	0.861	0.954	1.154	1.191	0.049	0.206	0.944	0.873	0.015	0.833	21846	2229
7-RNA	12471	195098	1321	2433075081	1.033	0.936	0.953	0.852	0.953	1.152	1.122	0.045	0.193	0.884	0.817	0.016	0.826	22817	3392
8-RNA	12748	164453	993	2096456566	0.974	0.944	0.953	0.85	0.953	0.888	0.862	0.034	0.142	0.686	0.635	0.01	0.845	21858	2432
9-RNA	12244	170097	1020	2082678993	0.977	0.945	0.955	0.869	0.956	0.888	0.862	0.028	0.108	0.726	0.68	0.011	0.79	21644	2570
10-RNA	11031	217793	1188	2402485450	1.029	0.947	0.955	0.852	0.955	1.103	1.07	0.039	0.136	0.895	0.834	0.015	0.82	22427	3039

## Sheet: HTO_QC
	Mean_UMIs_per_cell	Median_UMIs_per_cell	Mean_HTO_detected_per_cell	Median_HTO_detected_per_cell	Mean_bad_structure_per_cell	Median_bad_structure_per_cell	Mean_no_match_per_cell	Median_no_match_per_cell
1-HTO	1090.3	619	3.91117	4	28.4337	19	3.64144	2
2-HTO	563.942	343	3.83531	4	15.5076	12	1.88799	1
3-HTO	731.48	321	3.81262	4	15.916	9	2.04099	1
4-HTO	609.552	246	3.74658	4	13.7057	7	1.70719	0
5-HTO	720.718	324	3.83858	4	15.5428	9	2.11231	1
6-HTO	658.563	398	3.87859	4	16.3831	12	2.16948	1
7-HTO	531.544	327	3.83357	4	14.3053	11	1.75468	1
8-HTO	662.839	366	3.8881	4	17.4685	12	2.22075	1
9-HTO	741.496	472	3.83253	4	15.5013	11	2.4749	1
10-HTO	686.384	376	3.90836	4	17.9989	13	2.29355	1

## Sheet: ADT_QC
	Mean_UMIs_per_cell	Median_UMIs_per_cell	Mean_ADT_detected_per_cell	Median_ADT_detected_per_cell	Mean_bad_structure_per_cell	Median_bad_structure_per_cell	Mean_no_match_per_cell	Median_no_match_per_cell
1-ADT	2714.14	1841	37.9242	38	11.588	8	133.583	72
2-ADT	2604.77	1710	37.9771	38	11.0114	7	127.216	66
3-ADT	2676.55	1768	38.0108	38	11.3214	8	128.35	68
4-ADT	2847.55	1916	38.0009	38	12.0084	8	137.868	73
5-ADT	2911.02	1888	38.0575	38	12.6987	8	134.515	70
6-ADT	2559.16	1665.5	37.8929	38	11.0414	7	114.827	62
7-ADT	2844.14	1914	38.1029	38	12.2854	8	138.529	75
8-ADT	3169.26	2095	38.2189	38	13.5443	9	151.442	83
9-ADT	3138.16	2103	38.0403	38	13.4364	9	154.385	72
10-ADT	3014.39	1878	38.1349	38	12.8603	8	158.089	73
