# Supplementary material for: Single Cell Analysis of Blood Mononuclear Cells Stimulated Through Either LPS or Anti-CD3 and Anti-CD28
Source: Front Immunol. 2021 Mar 17;12:636720. doi: 10.3389/fimmu.2021.636720 (PMC8010670; doi:10.3389/fimmu.2021.636720)
Supplement: Supplementary file 5 [file Table_5.XLSX]

## Sheet: Legend
Table S5: Differential gene and protein expression analysis results for each cell-type at the specified condition vs. baseline condition. LPS = lipopolysaccharide, AntiCD3 = anti-CD3+CD28.

## Sheet: Monocyte_LPS
	p_val	avg_logFC	pct.1	pct.2	p_val_adj
CXCL1	0	2.42416	0.902	0.15	0
IL1B	0	2.35325	0.976	0.172	0
IL8	0	2.35073	0.989	0.34	0
CXCL5	0	2.19921	0.749	0.044	0
MT2A	0	2.12481	0.948	0.304	0
SOD2	0	1.65041	0.997	0.586	0
C15orf48	0	1.41207	0.958	0.19	0
MT1F	0	1.17882	0.798	0.029	0
CITE-CD25-TTTGTCCTGTACGCC	4.03625e-307	1.59881	1	0.989	6.27032e-303
CTSL	2.11525e-296	1.41311	0.929	0.262	3.28604e-292
PLAUR	1.21597e-292	1.0282	0.838	0.126	1.88901e-288
NAMPT	1.06167e-288	1.05992	0.902	0.241	1.64931e-284
CXCL3	3.1953e-286	2.0432	0.804	0.12	4.96389e-282
CITE-CD4-TGTTCCCGCTCAACT	1.19389e-274	-0.682781	0.961	1	1.85472e-270
MT1X	1.47395e-254	1.34054	0.811	0.161	2.28979e-250
S100A4	3.7792e-253	-0.833901	0.384	0.954	5.87099e-249
FTH1	4.71964e-231	0.889333	1	0.999	7.33196e-227
SLC25A37	1.60786e-229	0.694196	0.637	0.054	2.49781e-225
TMSB4X	5.97388e-226	-0.497463	0.994	0.999	9.28042e-222
TNIP3	6.89631e-224	0.675047	0.56	0.022	1.07134e-219
HLA-DRA	3.69878e-219	-0.700413	0.424	0.937	5.74606e-215
CCL3	8.84999e-218	1.96419	0.906	0.479	1.37485e-213
MT1M	7.03193e-216	0.904467	0.52	0.013	1.09241e-211
FCN1	8.5285e-216	-0.726786	0.112	0.821	1.3249e-211
MMP14	9.00056e-216	0.651349	0.667	0.083	1.39824e-211
S100A9	8.16577e-214	0.980342	0.99	0.93	1.26855e-209
CST3	6.02505e-212	-0.675956	0.259	0.885	9.35992e-208
LST1	9.42531e-212	-0.563444	0.211	0.884	1.46422e-207
FCER1G	6.89191e-207	0.677138	0.996	0.943	1.07066e-202
SERPINA1	2.97114e-206	0.743728	0.836	0.265	4.61567e-202
MT1G	2.04721e-205	1.55559	0.522	0.023	3.18034e-201
CD44	3.37621e-203	0.70166	0.896	0.372	5.24494e-199
HLA-DRB1	9.05938e-191	-0.679359	0.298	0.867	1.40737e-186
MT1E	3.07174e-189	0.647777	0.469	0.013	4.77195e-185
RP11-701P16.5	7.46688e-189	0.56824	0.445	0.005	1.15998e-184
AIF1	6.74429e-184	-0.497483	0.623	0.969	1.04773e-179
IER3	1.21357e-182	0.734525	0.793	0.241	1.88528e-178
CSTB	1.00082e-177	0.77205	0.961	0.706	1.55477e-173
SERPINB2	1.52891e-174	1.20599	0.571	0.079	2.37516e-170
TREM1	4.70503e-174	0.476145	0.43	0.01	7.30926e-170
CD14	6.11217e-174	0.846602	0.933	0.688	9.49526e-170
CXCL2	1.5242e-171	0.995694	0.675	0.153	2.36785e-167
GPX1	3.58568e-168	-0.489905	0.573	0.934	5.57035e-164
S100A8	1.06911e-167	0.974884	0.983	0.91	1.66086e-163
LILRA3	3.98341e-166	0.613337	0.482	0.036	6.18823e-162
C1orf122	2.01953e-162	0.614818	0.672	0.159	3.13735e-158
SLC11A1	1.217e-158	0.456013	0.486	0.043	1.89061e-154
TNFRSF1B	2.74125e-153	0.60208	0.709	0.207	4.25854e-149
PTMA	3.81208e-151	-0.36993	0.898	0.983	5.92207e-147
CD74	1.66623e-150	-0.500486	0.714	0.948	2.5885e-146
CITE-CD123-CTTCACTCTGTCAGG	4.18721e-149	0.870324	1	0.997	6.50483e-145
CITE-CD127-IL7Ra-GGCACCCATGTCTTT	7.30535e-149	0.491902	1	0.998	1.13489e-144
LYZ	9.07415e-147	-0.717362	0.648	0.947	1.40967e-142
AQP9	2.00302e-146	0.357385	0.384	0.013	3.11169e-142
RPL41	2.40051e-146	-0.325771	0.99	0.998	3.72919e-142
CITE-CD195-CCR5-CCAAAGTAAGAGCCA	4.56441e-145	-0.410441	1	1	7.0908e-141
CCL3L1	5.63659e-145	1.1899	0.378	0.013	8.75644e-141
MAP1LC3A	1.43724e-142	0.56507	0.406	0.025	2.23275e-138
BASP1	8.4441e-142	0.536484	0.625	0.142	1.31179e-137
SOCS3	1.2167e-140	0.404512	0.403	0.024	1.89015e-136
FUCA1	1.48753e-137	-0.5834	0.045	0.61	2.31088e-133
BCL2A1	9.46877e-137	0.475824	0.455	0.05	1.47097e-132
CTSS	1.52294e-132	-0.431818	0.571	0.91	2.36589e-128
RAB13	3.61052e-132	0.471804	0.534	0.095	5.60894e-128
HLA-DPB1	5.05115e-132	-0.54871	0.154	0.687	7.84696e-128
RPL36A	1.46101e-130	-0.446376	0.431	0.84	2.26969e-126
VAMP8	2.62143e-130	-0.421733	0.374	0.832	4.0724e-126
GK	8.14326e-129	0.448015	0.504	0.083	1.26506e-124
HLA-DMA	4.29545e-126	-0.455632	0.081	0.613	6.67298e-122
ATP13A3	1.32632e-124	0.392713	0.422	0.046	2.06044e-120
MT1H	1.62012e-124	0.973084	0.319	0.008	2.51685e-120
RETN	2.60084e-124	0.780119	0.329	0.011	4.0404e-120
S100A12	6.78388e-124	0.83103	0.766	0.368	1.05388e-119
CCL7	1.74184e-117	0.984904	0.317	0.012	2.70594e-113
KYNU	2.56693e-117	0.438337	0.493	0.091	3.98773e-113
RPL12	6.58165e-117	-0.375479	0.685	0.923	1.02246e-112
CD300E	8.54692e-117	0.421615	0.437	0.062	1.32776e-112
CALM2	8.78094e-116	-0.383781	0.557	0.871	1.36412e-111
FOS	5.83935e-115	-0.489701	0.319	0.771	9.07143e-111
HLA-DPA1	3.59695e-114	-0.516773	0.192	0.665	5.58787e-110
CCL2	1.22673e-113	2.05464	0.758	0.435	1.90572e-109
RPL21	1.27622e-112	-0.297102	0.941	0.984	1.9826e-108
SERF2	4.87222e-112	-0.288985	0.924	0.989	7.569e-108
FPR1	1.73929e-111	0.384866	0.403	0.05	2.70199e-107
MALAT1	5.39772e-111	0.296525	1	1	8.38535e-107
HLA-DRB5	1.67033e-110	-0.548463	0.102	0.593	2.59486e-106
CCL4	5.63184e-110	1.09905	0.717	0.349	8.74906e-106
PTGES	5.67574e-109	0.362723	0.269	0.003	8.81727e-105
TYROBP	4.10622e-108	-0.284207	0.948	0.995	6.37901e-104
C19orf59	1.09267e-107	0.35389	0.282	0.007	1.69747e-103
IL6	2.55574e-107	0.587965	0.269	0.004	3.97035e-103
TNFAIP6	1.08764e-106	0.523804	0.308	0.017	1.68966e-102
RPS27	7.44481e-106	-0.265749	0.986	0.999	1.15655e-101
HIF1A	2.33157e-105	0.431261	0.55	0.148	3.62209e-101
GSTP1	3.13544e-104	-0.401687	0.452	0.812	4.87091e-100
EREG	8.348e-102	0.365032	0.27	0.008	1.29686e-97
GPR84	1.01593e-101	0.326445	0.322	0.026	1.57824e-97
RPL27A	1.75169e-100	-0.321997	0.864	0.969	2.72126e-96
NBEAL1	5.09731e-99	-0.376885	0.438	0.797	7.91867e-95
RPL34	6.3953e-99	-0.292351	0.951	0.986	9.93509e-95
ITGB8	1.04344e-97	0.283722	0.275	0.012	1.62098e-93
RPL26	1.55164e-97	-0.331705	0.829	0.951	2.41047e-93
PFKFB3	6.6717e-95	0.332455	0.406	0.069	1.03645e-90
RPS24	9.72352e-94	-0.315096	0.783	0.952	1.51055e-89
RP11-1143G9.4	1.29482e-93	-0.652861	0.352	0.751	2.0115e-89
HIST2H2AA3	1.47496e-93	0.613346	0.65	0.273	2.29136e-89
RPL10A	8.63377e-93	-0.355045	0.532	0.848	1.34126e-88
RPL35	1.15035e-92	-0.299412	0.815	0.96	1.78706e-88
TNIP1	3.0564e-92	0.336294	0.43	0.086	4.74812e-88
IL7R	1.05663e-91	0.371236	0.38	0.062	1.64148e-87
BLVRB	1.00799e-89	-0.388768	0.261	0.681	1.56592e-85
CD82	4.43656e-89	0.326905	0.398	0.073	6.8922e-85
GAPDH	6.01396e-89	0.39088	0.975	0.867	9.34268e-85
PLAC8	2.27058e-87	0.599062	0.326	0.043	3.52735e-83
VCAN	4.95717e-87	0.491064	0.501	0.144	7.70096e-83
CD36	7.2541e-87	-0.353743	0.015	0.423	1.12692e-82
RPLP2	1.63868e-86	-0.285303	0.917	0.974	2.54569e-82
RPS13	2.60188e-86	-0.292216	0.836	0.96	4.04203e-82
RPL32	2.76754e-85	-0.268151	0.927	0.987	4.29938e-81
UPP1	4.65221e-85	0.301115	0.361	0.058	7.22721e-81
RPS2	4.81755e-85	-0.284321	0.923	0.978	7.48407e-81
RNASE6	7.58382e-85	-0.381737	0.022	0.427	1.17815e-80
RPS14	1.00779e-84	-0.262017	0.94	0.987	1.5656e-80
RPL18A	3.4579e-84	-0.271612	0.934	0.982	5.37184e-80
GSTO1	3.90279e-84	0.432983	0.772	0.444	6.06298e-80
POLR2L	5.67703e-84	-0.339578	0.475	0.794	8.81927e-80
IL1RN	8.17397e-84	0.371246	0.294	0.031	1.26983e-79
CD63	1.52323e-83	0.352847	0.962	0.82	2.36634e-79
RPLP1	4.06418e-83	-0.26028	0.969	0.993	6.3137e-79
MS4A6A	2.77682e-82	-0.42104	0.083	0.49	4.31378e-78
PILRA	2.22358e-81	0.394657	0.697	0.337	3.45433e-77
RPS23	3.30972e-81	-0.283027	0.833	0.956	5.14165e-77
HCST	4.90097e-80	-0.364898	0.161	0.567	7.61366e-76
NFKBIA	9.38685e-80	0.4048	0.752	0.399	1.45825e-75
PLP2	2.08876e-79	0.419843	0.504	0.164	3.24489e-75
STAB1	3.51851e-79	-0.353379	0.067	0.47	5.466e-75
HLA-DMB	4.48126e-79	-0.343339	0.031	0.417	6.96163e-75
RPS18	4.98287e-79	-0.256655	0.964	0.986	7.74089e-75
SLC7A11	6.2779e-79	0.305716	0.342	0.057	9.75272e-75
RNASE1	7.13797e-79	-0.520792	0.027	0.409	1.10888e-74
S100A11	1.37208e-78	0.327005	0.976	0.936	2.13152e-74
RPS8	1.2119e-77	-0.285738	0.873	0.959	1.88268e-73
CD59	7.2666e-77	0.305208	0.36	0.068	1.12887e-72
RPL13	2.33022e-76	-0.262189	0.948	0.986	3.61999e-72
IDO1	2.80181e-76	0.359525	0.272	0.029	4.35262e-72
RPS12	4.19363e-76	-0.276581	0.838	0.955	6.51481e-72
CCL3L3	1.79705e-75	0.47885	0.217	0.01	2.79171e-71
PFDN5	7.53745e-75	-0.269476	0.794	0.939	1.17094e-70
TIMP1	3.25877e-74	0.561269	0.902	0.779	5.0625e-70
GLRX	1.29197e-73	0.454146	0.714	0.399	2.00708e-69
RPL39	1.56267e-73	-0.266721	0.866	0.96	2.42761e-69
CLEC4E	2.60732e-73	0.290198	0.342	0.064	4.05048e-69
PSAP	1.06689e-72	-0.315887	0.699	0.884	1.65742e-68
FGL2	1.52202e-72	-0.313871	0.036	0.402	2.36446e-68
MNDA	1.21757e-71	-0.32848	0.042	0.41	1.8915e-67
HCK	5.23424e-71	0.354466	0.581	0.243	8.13139e-67
PPBP	5.65852e-69	1.85516	0.272	0.04	8.79051e-65
ACSL1	6.83857e-69	0.256403	0.28	0.04	1.06237e-64
TXN	3.56667e-67	0.492012	0.836	0.605	5.54082e-63
RPL22	9.90048e-67	-0.293	0.532	0.808	1.53804e-62
LILRB1	2.76683e-66	0.333651	0.434	0.132	4.29827e-62
SLC39A8	3.35682e-66	0.277834	0.273	0.04	5.21482e-62
RPL23A	4.70202e-66	-0.262575	0.804	0.93	7.30459e-62
MUCL1	5.76842e-66	0.991818	0.178	0.005	8.96124e-62
EBI3	1.77453e-65	0.250302	0.214	0.017	2.75673e-61
MXD1	3.75117e-65	0.263221	0.318	0.062	5.82744e-61
PYCARD	6.80905e-64	-0.312785	0.126	0.484	1.05779e-59
CEBPB	2.63628e-61	0.374753	0.665	0.356	4.09547e-57
SRGN	4.76468e-60	0.33268	0.905	0.768	7.40193e-56
LYN	5.03991e-60	0.31501	0.508	0.199	7.8295e-56
CYBB	6.88034e-60	-0.274673	0.373	0.725	1.06886e-55
MPEG1	7.28776e-60	-0.297827	0.099	0.439	1.13215e-55
PTGS2	2.49284e-59	0.318442	0.189	0.014	3.87263e-55
MARCO	5.54574e-59	0.296672	0.16	0.005	8.61531e-55
LGALS1	6.36616e-59	0.407593	0.929	0.894	9.88983e-55
FPR3	9.8704e-59	-0.272836	0.034	0.348	1.53337e-54
COTL1	1.36419e-58	-0.300345	0.347	0.668	2.11927e-54
TGFBI	1.75281e-58	-0.287951	0.098	0.431	2.723e-54
NFXL1	4.88263e-58	-0.302998	0.025	0.331	7.58516e-54
HLA-DQB1	2.53404e-56	-0.299679	0.05	0.362	3.93663e-52
LY86	1.61964e-55	-0.264447	0.022	0.316	2.51612e-51
CD48	4.53674e-55	0.374404	0.585	0.303	7.04783e-51
METTL9	5.08637e-55	0.303697	0.43	0.154	7.90167e-51
IER2	6.76252e-55	-0.313186	0.223	0.558	1.05056e-50
CLEC7A	3.58262e-54	-0.278116	0.06	0.368	5.5656e-50
RPS11	1.12283e-53	-0.255875	0.675	0.852	1.74432e-49
ITM2B	4.00263e-53	-0.271035	0.514	0.76	6.21808e-49
GRN	2.06308e-52	-0.297043	0.301	0.608	3.205e-48
ACP5	2.73714e-52	-0.307713	0.046	0.34	4.25215e-48
RPL17	2.8855e-50	-0.254258	0.634	0.848	4.48262e-46
WTAP	5.79566e-50	0.30283	0.448	0.176	9.00356e-46
CCL4L2	6.46337e-50	0.296341	0.155	0.01	1.00409e-45
G0S2	7.8368e-50	0.322751	0.176	0.018	1.21745e-45
APRT	8.08744e-50	-0.271693	0.238	0.548	1.25638e-45
ATP5G2	1.53412e-49	-0.254284	0.451	0.71	2.38325e-45
NINJ1	8.53205e-49	0.320303	0.556	0.282	1.32545e-44
WDR74	1.53942e-47	-0.27846	0.083	0.367	2.39149e-43
NDUFB2	1.6838e-47	-0.256821	0.324	0.618	2.61578e-43
HLA-DQA1	2.11638e-46	-0.304872	0.085	0.367	3.28779e-42
CYP1B1	1.84922e-45	0.352631	0.685	0.457	2.87277e-41
SAMHD1	8.28408e-45	-0.258838	0.129	0.417	1.28693e-40
S100A10	1.76161e-44	0.334883	0.744	0.55	2.73666e-40
AMICA1	3.37424e-43	-0.251753	0.035	0.283	5.24188e-39
SEC62	1.8252e-42	0.295381	0.612	0.361	2.83545e-38
ANXA1	6.16034e-42	0.32387	0.545	0.29	9.57009e-38
VIM	9.62546e-42	0.293497	0.759	0.559	1.49532e-37
NKG7	1.44272e-41	0.306104	0.331	0.114	2.24126e-37
CXCL6	1.60837e-41	0.292982	0.113	0.003	2.4986e-37
CITE-CD16-AAGTTCACTCTTTGC	2.04929e-41	-0.509823	0.811	0.901	3.18357e-37
SLC3A2	6.56628e-41	0.254356	0.457	0.21	1.02007e-36
CTSB	2.07951e-40	0.276612	0.892	0.751	3.23053e-36
PDE4DIP	1.25831e-38	0.252682	0.402	0.168	1.95478e-34
SAMSN1	1.65333e-38	0.257883	0.556	0.308	2.56845e-34
MARCKS	2.59771e-37	0.262571	0.794	0.604	4.03554e-33
GPNMB	1.66925e-35	-0.352041	0.017	0.218	2.59318e-31
CTSC	3.04071e-35	-0.261817	0.164	0.416	4.72374e-31
FN1	2.63799e-32	-0.286298	0.011	0.193	4.09811e-28
MYL12A	1.267e-30	0.254463	0.756	0.623	1.96828e-26
IL24	2.53162e-30	0.281322	0.097	0.007	3.93286e-26
VMO1	2.9747e-29	-0.301768	0.064	0.262	4.62119e-25
MMP9	2.27174e-28	0.391153	0.668	0.494	3.52915e-24
CCL20	2.19375e-22	0.315693	0.15	0.041	3.40799e-18
LGMN	3.20774e-21	-0.282737	0.05	0.2	4.98322e-17
HMOX1	1.20586e-20	-0.267542	0.196	0.374	1.8733e-16
CCL8	9.58491e-11	0.377367	0.091	0.031	1.48902e-06

## Sheet: Bcell_AntiCD3
	p_val	avg_logFC	pct.1	pct.2	p_val_adj
CITE-CD69-GTCTCTTGGCTTAAA	3.89799e-121	1.18717	1	1	5.24045e-117
B2M	5.02333e-88	0.381231	1	1	6.75337e-84
PSME2	7.3311e-82	0.699056	0.901	0.506	9.85593e-78
ACTB	2.94814e-78	0.594764	0.997	0.962	3.96348e-74
HSP90AB1	3.34372e-74	0.767822	0.888	0.579	4.49529e-70
TMSB10	1.53784e-66	0.455681	0.992	0.966	2.06747e-62
ACTG1	2.79812e-64	0.635161	0.827	0.471	3.76179e-60
POMP	8.78533e-64	0.577194	0.739	0.299	1.1811e-59
PRDX1	4.99475e-63	0.618408	0.665	0.222	6.71494e-59
TXN	1.64094e-62	0.786264	0.739	0.316	2.20608e-58
TUBA1B	4.67617e-62	0.636496	0.761	0.358	6.28664e-58
HSP90AA1	4.74531e-62	0.639403	0.802	0.409	6.3796e-58
EIF1	4.29176e-59	0.488111	0.934	0.752	5.76984e-55
PFN1	1.96358e-58	0.545688	0.957	0.773	2.63984e-54
MIR155HG	6.8894e-58	0.660953	0.523	0.117	9.26211e-54
SEC61B	1.12189e-57	0.535792	0.64	0.221	1.50826e-53
HLA-A	3.13322e-57	0.439078	0.97	0.797	4.2123e-53
DDX21	3.30572e-57	0.518884	0.538	0.129	4.44422e-53
RPS24	2.52651e-56	0.606226	0.957	0.835	3.39664e-52
EIF4A1	2.08256e-55	0.615771	0.772	0.415	2.7998e-51
TUBB	1.96105e-54	0.536698	0.647	0.234	2.63643e-50
HSPE1	3.87017e-54	0.643508	0.718	0.322	5.20306e-50
NCL	3.24687e-53	0.631336	0.782	0.446	4.3651e-49
YBX1	4.09208e-52	0.649363	0.848	0.574	5.5014e-48
PSME1	3.49703e-51	0.46337	0.871	0.605	4.70141e-47
CFL1	1.55117e-50	0.519864	0.855	0.609	2.08539e-46
MIF	1.96514e-50	0.654697	0.822	0.538	2.64193e-46
RPLP1	4.08246e-50	0.400923	1	0.997	5.48846e-46
HLA-B	5.53225e-50	0.387028	0.997	0.891	7.43755e-46
TMSB4X	7.66341e-50	0.359869	1	1	1.03027e-45
PSMA7	6.94159e-49	0.540389	0.701	0.318	9.33227e-45
CITE-CD278-ICOS-CGCGCACCCATTAAA	3.01772e-48	0.333552	1	1	4.05702e-44
ATP5E	4.03039e-48	0.461681	0.924	0.756	5.41845e-44
RPS2	4.53349e-48	0.494444	1	0.992	6.09483e-44
H3F3B	6.68212e-48	0.488894	0.873	0.586	8.98345e-44
NHP2	1.29485e-47	0.466094	0.536	0.163	1.7408e-43
RAN	2.2979e-47	0.588857	0.723	0.391	3.0893e-43
PSMB3	2.89388e-47	0.480477	0.68	0.308	3.89053e-43
NME1-NME2	1.62601e-46	0.564975	0.609	0.254	2.18601e-42
DBI	1.89116e-46	0.459161	0.622	0.241	2.54247e-42
NPM1	3.83693e-46	0.623339	0.858	0.654	5.15837e-42
CD83	3.84161e-46	0.445663	0.485	0.124	5.16466e-42
CHCHD2	5.16228e-46	0.501673	0.782	0.446	6.94017e-42
RPL35	6.15278e-46	0.48907	0.99	0.967	8.2718e-42
RPLP0	3.13005e-45	0.512193	0.967	0.872	4.20804e-41
HLA-C	8.7044e-45	0.376708	0.944	0.822	1.17022e-40
ENO1	1.47908e-44	0.612598	0.756	0.455	1.98847e-40
ATP5G1	2.15855e-44	0.453021	0.533	0.17	2.90195e-40
WARS	7.6526e-44	0.419263	0.561	0.193	1.02882e-39
PPIA	1.89324e-43	0.48949	0.815	0.528	2.54528e-39
UBB	2.59422e-43	0.407111	0.845	0.571	3.48767e-39
EIF5A	4.20238e-43	0.533372	0.607	0.244	5.64968e-39
GBP1	4.70178e-43	0.398772	0.495	0.135	6.32108e-39
RPS12	1.08656e-42	0.408567	0.995	0.986	1.46077e-38
NME1	1.40647e-42	0.511229	0.444	0.115	1.89086e-38
NDUFA4	2.19981e-42	0.46213	0.726	0.392	2.95743e-38
RPS19	9.27149e-42	0.328156	1	0.999	1.24646e-37
HSPA8	1.1455e-41	0.492858	0.734	0.447	1.54001e-37
RPL27	1.17102e-41	0.446336	0.962	0.87	1.57432e-37
NFKBIA	1.69357e-41	0.425825	0.536	0.175	2.27683e-37
SNRPG	1.69922e-41	0.470834	0.66	0.298	2.28443e-37
HNRNPA1	1.88388e-41	0.533771	0.827	0.573	2.53269e-37
SNRPD1	2.27196e-41	0.468028	0.556	0.206	3.05442e-37
RPL28	3.71774e-41	0.423553	0.987	0.971	4.99813e-37
C19orf70	5.20159e-41	0.372025	0.472	0.13	6.99302e-37
PA2G4	6.8309e-41	0.485957	0.556	0.202	9.18346e-37
BCL2A1	1.18724e-40	0.39646	0.343	0.055	1.59613e-36
CITE-CD25-TTTGTCCTGTACGCC	1.21338e-40	0.458155	1	0.997	1.63127e-36
RPS27A	1.42777e-40	0.342927	0.992	0.991	1.9195e-36
FABP5	1.6962e-40	0.790129	0.503	0.177	2.28037e-36
TYMP	2.44767e-40	0.435889	0.614	0.254	3.29065e-36
PSMA4	3.63926e-40	0.38517	0.541	0.192	4.89262e-36
HSPD1	2.05492e-39	0.484677	0.546	0.198	2.76263e-35
RPL37A	2.10469e-39	0.503624	0.987	0.959	2.82954e-35
COX7A2	2.67155e-39	0.404106	0.766	0.465	3.59163e-35
RANBP1	6.66668e-39	0.504708	0.505	0.177	8.96269e-35
SLIRP	9.08695e-39	0.44123	0.528	0.187	1.22165e-34
SNRPE	1.45602e-38	0.447151	0.614	0.286	1.95747e-34
TALDO1	3.47825e-38	0.359155	0.459	0.135	4.67616e-34
FTL	3.92896e-38	0.383451	0.98	0.962	5.28209e-34
ATP5I	4.46206e-38	0.45169	0.693	0.371	5.99879e-34
RPL19	4.46747e-38	0.374739	0.992	0.98	6.00606e-34
RPL7A	4.89122e-38	0.496446	0.906	0.789	6.57576e-34
PSMB1	5.22465e-38	0.439965	0.627	0.291	7.02402e-34
CXCL10	6.37984e-38	0.862484	0.284	0.034	8.57706e-34
COX17	6.8225e-38	0.411381	0.556	0.214	9.17217e-34
RPS5	1.02833e-37	0.43071	0.977	0.966	1.38249e-33
NDUFA13	1.60361e-37	0.410472	0.642	0.294	2.15589e-33
SYNGR2	1.61028e-37	0.375533	0.581	0.239	2.16486e-33
POLR2L	1.94565e-37	0.426732	0.612	0.281	2.61573e-33
ATP5L	2.0713e-37	0.416254	0.792	0.525	2.78465e-33
COX7B	3.09501e-37	0.403821	0.622	0.283	4.16093e-33
CD40	3.83076e-37	0.326474	0.406	0.1	5.15008e-33
RBM8A	6.1531e-37	0.389866	0.614	0.271	8.27222e-33
LDHA	6.76548e-37	0.497427	0.612	0.273	9.09551e-33
ATP5G3	9.62905e-37	0.466503	0.538	0.206	1.29453e-32
RPLP2	1.01325e-36	0.33128	1	0.994	1.36221e-32
CALR	3.00942e-36	0.387989	0.482	0.162	4.04586e-32
PARK7	3.0286e-36	0.416325	0.599	0.274	4.07165e-32
GBP4	4.40043e-36	0.357557	0.477	0.152	5.91594e-32
PHB	4.80337e-36	0.376482	0.449	0.137	6.45765e-32
RBM3	6.05013e-36	0.34895	0.571	0.232	8.1338e-32
HINT1	7.88072e-36	0.398316	0.772	0.511	1.05948e-31
RPS21	1.67904e-35	0.446367	0.975	0.883	2.2573e-31
RPS15	2.34335e-35	0.367538	0.997	0.989	3.1504e-31
RBX1	2.81391e-35	0.385502	0.637	0.31	3.78303e-31
EIF2S2	3.3995e-35	0.386745	0.609	0.272	4.57029e-31
ALDOA	3.83714e-35	0.494152	0.713	0.421	5.15866e-31
RPL10A	5.07726e-35	0.42651	0.959	0.882	6.82587e-31
ARPC2	5.2585e-35	0.426055	0.688	0.391	7.06952e-31
PSMA3	5.48549e-35	0.349323	0.457	0.142	7.37469e-31
TCEB2	6.19928e-35	0.435434	0.703	0.4	8.33431e-31
SRP14	8.88895e-35	0.420774	0.822	0.566	1.19503e-30
RPS23	1.1574e-34	0.381319	0.987	0.99	1.55601e-30
APRT	1.51883e-34	0.453295	0.576	0.271	2.04191e-30
SERBP1	1.7808e-34	0.511778	0.612	0.294	2.39411e-30
PPIB	2.20529e-34	0.396068	0.566	0.242	2.96479e-30
UQCRQ	2.43255e-34	0.448377	0.602	0.296	3.27032e-30
TMA7	2.54244e-34	0.413568	0.855	0.627	3.41805e-30
EIF5B	2.81556e-34	0.4033	0.52	0.203	3.78524e-30
FAU	3.02266e-34	0.322918	0.985	0.941	4.06366e-30
CLIC1	3.32208e-34	0.374882	0.701	0.398	4.46621e-30
EEF1A1	4.39592e-34	0.37244	0.995	0.99	5.90988e-30
PTMA	5.7484e-34	0.401606	0.992	0.99	7.72816e-30
SERF2	5.95324e-34	0.308943	0.942	0.799	8.00354e-30
EIF5AL1	7.85741e-34	0.384123	0.386	0.1	1.05635e-29
RPS29	8.90955e-34	0.288509	1	0.997	1.1978e-29
SNRPF	1.16708e-33	0.431863	0.53	0.212	1.56903e-29
PRMT1	1.51152e-33	0.409262	0.487	0.183	2.03209e-29
HNRNPA2B1	1.97468e-33	0.359191	0.67	0.351	2.65476e-29
ATP5J2	2.14594e-33	0.400396	0.602	0.298	2.885e-29
PSMB10	3.47682e-33	0.334313	0.599	0.271	4.67424e-29
MINOS1	4.4732e-33	0.39461	0.492	0.188	6.01377e-29
SSBP1	4.59484e-33	0.374496	0.503	0.194	6.17731e-29
BID	5.54163e-33	0.300318	0.302	0.054	7.45017e-29
LCP1	5.97593e-33	0.300706	0.431	0.133	8.03404e-29
NOP10	7.4741e-33	0.389891	0.571	0.271	1.00482e-28
C1QBP	9.04419e-33	0.456053	0.543	0.241	1.2159e-28
RPL22L1	1.24529e-32	0.393815	0.416	0.129	1.67417e-28
SRSF2	1.65137e-32	0.355702	0.429	0.134	2.2201e-28
RPS25	1.6906e-32	0.382973	0.982	0.951	2.27284e-28
RPL24	2.24148e-32	0.408002	0.886	0.742	3.01345e-28
PSMD8	2.93022e-32	0.342463	0.426	0.134	3.93938e-28
RPS8	3.57554e-32	0.382082	0.992	0.974	4.80696e-28
COX6C	3.99595e-32	0.42131	0.69	0.411	5.37216e-28
RPS10	5.97336e-32	0.408173	0.911	0.817	8.03059e-28
GSTP1	6.54964e-32	0.4321	0.635	0.35	8.80533e-28
COX6B1	8.19545e-32	0.381246	0.711	0.429	1.1018e-27
PSMB9	1.02783e-31	0.36387	0.761	0.459	1.38181e-27
RPL10	1.10777e-31	0.335814	1	0.999	1.48929e-27
RPL12	1.17384e-31	0.419153	0.98	0.96	1.57812e-27
RPS26	1.79011e-31	0.485537	0.878	0.753	2.40662e-27
RPL6	4.84613e-31	0.432385	0.944	0.882	6.51514e-27
RPL37	5.92931e-31	0.395242	0.977	0.957	7.97136e-27
EEF1B2	6.32109e-31	0.424033	0.779	0.553	8.49807e-27
PSMB2	6.58907e-31	0.352222	0.426	0.139	8.85835e-27
EMP3	7.73487e-31	0.369168	0.665	0.381	1.03988e-26
RPL7	7.84598e-31	0.405359	0.975	0.962	1.05481e-26
CXCL9	8.32568e-31	0.332442	0.175	0.005	1.1193e-26
TPI1	8.52162e-31	0.45868	0.668	0.396	1.14565e-26
GADD45GIP1	9.95914e-31	0.358663	0.49	0.189	1.33891e-26
SLC25A5	1.35199e-30	0.432928	0.584	0.287	1.81762e-26
DNAJA1	1.5901e-30	0.338871	0.475	0.175	2.13773e-26
NACA	2.06658e-30	0.409174	0.868	0.683	2.77832e-26
PPA1	2.39021e-30	0.375141	0.429	0.149	3.2134e-26
RPL5	3.00783e-30	0.483106	0.886	0.753	4.04372e-26
ERH	3.4535e-30	0.380128	0.566	0.269	4.64288e-26
PSMA5	5.45926e-30	0.319278	0.439	0.15	7.33942e-26
RPS6	6.39484e-30	0.365766	0.997	0.985	8.59722e-26
C11orf48	6.64764e-30	0.278018	0.388	0.114	8.93709e-26
RPL27A	6.77479e-30	0.350164	0.99	0.982	9.10803e-26
ISG20	7.85815e-30	0.385257	0.797	0.591	1.05645e-25
BATF	8.47844e-30	0.315715	0.34	0.085	1.13984e-25
RPL39	9.10117e-30	0.339389	0.992	0.98	1.22356e-25
RPS16	9.93951e-30	0.405521	0.964	0.922	1.33627e-25
SNRPD2	1.16778e-29	0.411053	0.68	0.427	1.56996e-25
RPL14	1.21463e-29	0.436141	0.964	0.89	1.63294e-25
PDIA6	1.58279e-29	0.293269	0.386	0.112	2.1279e-25
MYL6	1.59191e-29	0.366481	0.855	0.717	2.14017e-25
COX6A1	1.71384e-29	0.407689	0.599	0.323	2.30409e-25
SSR4	2.0662e-29	0.318221	0.619	0.312	2.7778e-25
PSMC3	3.43662e-29	0.300659	0.393	0.123	4.62019e-25
SRI	3.56646e-29	0.295922	0.421	0.142	4.79475e-25
SRSF3	4.30264e-29	0.353874	0.492	0.206	5.78447e-25
HNRNPM	4.66531e-29	0.378973	0.576	0.278	6.27204e-25
SET	5.03795e-29	0.399993	0.678	0.4	6.77302e-25
METAP2	5.42005e-29	0.278651	0.431	0.145	7.28671e-25
UQCR10	5.46394e-29	0.337951	0.561	0.259	7.34572e-25
RPL18A	5.70554e-29	0.318617	0.997	1	7.67053e-25
EAF2	5.99977e-29	0.296815	0.355	0.096	8.06609e-25
GADD45B	7.28225e-29	0.287675	0.355	0.098	9.79026e-25
SRM	8.20043e-29	0.378886	0.406	0.138	1.10247e-24
GNB2L1	1.17454e-28	0.378063	0.919	0.831	1.57905e-24
NOP56	1.20899e-28	0.291984	0.345	0.091	1.62537e-24
PSMD7	1.39347e-28	0.255345	0.35	0.094	1.87338e-24
UBA52	1.42554e-28	0.349359	0.944	0.89	1.9165e-24
RPL15	1.63626e-28	0.361117	0.992	0.974	2.19979e-24
EIF6	1.75814e-28	0.328384	0.393	0.128	2.36365e-24
RPL8	2.20417e-28	0.372559	0.975	0.967	2.96328e-24
PDIA3	2.2311e-28	0.305266	0.492	0.199	2.99949e-24
NDUFB2	2.43775e-28	0.332898	0.553	0.268	3.27732e-24
BTF3	3.14649e-28	0.395348	0.817	0.633	4.23014e-24
ROMO1	3.86022e-28	0.329355	0.47	0.187	5.18967e-24
TOMM5	4.19453e-28	0.357733	0.459	0.185	5.63913e-24
RPL36AL	5.11516e-28	0.354388	0.769	0.555	6.87681e-24
NDUFAB1	5.45182e-28	0.336238	0.414	0.145	7.32942e-24
SRSF9	5.85424e-28	0.342769	0.52	0.238	7.87044e-24
NDUFA11	6.74808e-28	0.340519	0.482	0.199	9.07212e-24
UBALD2	8.38735e-28	0.265463	0.292	0.064	1.1276e-23
NDUFA2	9.28122e-28	0.280277	0.419	0.143	1.24777e-23
SUB1	1.00298e-27	0.390255	0.602	0.325	1.34841e-23
RPL11	1.01249e-27	0.318742	0.995	0.989	1.36119e-23
RPL9	1.62264e-27	0.38433	0.947	0.909	2.18148e-23
TIMM13	1.65435e-27	0.343732	0.431	0.159	2.2241e-23
ATP5J	1.90221e-27	0.364665	0.563	0.289	2.55733e-23
CALM2	1.91873e-27	0.331303	0.668	0.412	2.57954e-23
NDUFS6	2.9877e-27	0.329497	0.429	0.158	4.01666e-23
PRELID1	3.1748e-27	0.347391	0.518	0.232	4.2682e-23
HLA-DRB1	4.3089e-27	0.338226	0.886	0.749	5.79289e-23
WDR43	5.21536e-27	0.28724	0.34	0.095	7.01153e-23
HSPA5	6.0589e-27	0.284974	0.353	0.102	8.14559e-23
DDX5	6.76735e-27	0.287663	0.716	0.456	9.09803e-23
SEC61G	8.16794e-27	0.341797	0.497	0.218	1.0981e-22
COX6A1P2	1.57244e-26	0.364114	0.485	0.219	2.11399e-22
MRPL52	2.1229e-26	0.310773	0.452	0.179	2.85403e-22
EIF3J	2.84628e-26	0.339146	0.406	0.149	3.82654e-22
CFLAR	2.86371e-26	0.287849	0.36	0.112	3.84997e-22
BST2	4.16885e-26	0.324759	0.541	0.266	5.6046e-22
USMG5	4.21427e-26	0.378303	0.609	0.331	5.66566e-22
MRPL14	4.43996e-26	0.252824	0.305	0.076	5.96908e-22
TMEM258	5.35818e-26	0.343546	0.574	0.316	7.20354e-22
GAPDH	5.93682e-26	0.547161	0.815	0.642	7.98147e-22
RPL38	6.34988e-26	0.354939	0.926	0.867	8.53678e-22
RPL36	8.54441e-26	0.358725	0.987	0.985	1.14871e-21
NHP2L1	9.54249e-26	0.361365	0.528	0.259	1.28289e-21
RPS13	9.82504e-26	0.356644	0.985	0.966	1.32088e-21
C14orf2	1.06887e-25	0.358677	0.561	0.287	1.43699e-21
SDF2L1	1.13352e-25	0.283767	0.36	0.114	1.5239e-21
RPL23	1.3437e-25	0.422159	0.904	0.766	1.80647e-21
UBL5	1.41281e-25	0.324975	0.645	0.368	1.89939e-21
FKBP2	1.43585e-25	0.271519	0.378	0.125	1.93035e-21
RPS9	1.51257e-25	0.315989	0.992	0.964	2.03349e-21
SHFM1	1.54189e-25	0.341184	0.52	0.251	2.07291e-21
PKM	1.68138e-25	0.410201	0.574	0.311	2.26044e-21
UBE2D3	1.88904e-25	0.282748	0.475	0.202	2.53963e-21
RPL17	2.04737e-25	0.41241	0.942	0.878	2.75248e-21
RPS11	2.14536e-25	0.322286	0.957	0.9	2.88422e-21
RPS7	2.17675e-25	0.422196	0.954	0.895	2.92642e-21
HLA-DRA	2.22526e-25	0.292059	0.949	0.929	2.99164e-21
RPSA	3.57792e-25	0.408296	0.876	0.754	4.81016e-21
PFDN2	5.4228e-25	0.311698	0.406	0.152	7.29041e-21
SNRPB	5.57071e-25	0.328762	0.487	0.222	7.48926e-21
YWHAB	6.13954e-25	0.293142	0.52	0.248	8.254e-21
RPL22	9.48684e-25	0.375214	0.886	0.763	1.27541e-20
TPM3	9.69051e-25	0.289946	0.609	0.317	1.30279e-20
RPL35A	1.02498e-24	0.346499	0.985	0.957	1.37798e-20
CITE-CD38-ATCCTTTGCCGTGTT	1.04212e-24	0.557731	1	1	1.40103e-20
NUDC	1.26707e-24	0.312941	0.393	0.145	1.70345e-20
NBEAL1	1.67172e-24	0.392153	0.926	0.867	2.24746e-20
ATOX1	1.7949e-24	0.283901	0.338	0.105	2.41306e-20
CCT3	2.12941e-24	0.265247	0.373	0.125	2.86278e-20
NDUFA6	2.23536e-24	0.271646	0.378	0.129	3.00521e-20
RPL4	2.3828e-24	0.356525	0.863	0.707	3.20344e-20
VIM	3.4727e-24	0.301182	0.393	0.147	4.6687e-20
MT-ND5	4.11096e-24	0.340194	0.683	0.427	5.52677e-20
CCT6A	4.12829e-24	0.309433	0.358	0.12	5.55007e-20
RPL41	4.9177e-24	0.293877	1	1	6.61135e-20
COX5B	5.63339e-24	0.320981	0.629	0.375	7.57353e-20
JUNB	5.91414e-24	0.262247	0.335	0.103	7.95098e-20
RPSAP58	7.59902e-24	0.40333	0.789	0.643	1.02161e-19
CYCS	1.10342e-23	0.344558	0.47	0.214	1.48344e-19
PSMB6	1.33064e-23	0.304998	0.437	0.182	1.78891e-19
COX5A	1.33234e-23	0.339157	0.464	0.216	1.7912e-19
UBE2L3	1.40727e-23	0.329397	0.416	0.168	1.89193e-19
NDUFB9	1.49257e-23	0.329878	0.472	0.213	2.00661e-19
RPL13	1.50791e-23	0.277448	0.997	0.997	2.02723e-19
RPL36A	1.53385e-23	0.38067	0.916	0.848	2.0621e-19
RPL23A	1.84383e-23	0.293167	0.99	0.992	2.47885e-19
MANF	1.87654e-23	0.271529	0.358	0.12	2.52282e-19
SNRPB2	1.87685e-23	0.258507	0.447	0.182	2.52324e-19
FDPS	2.05713e-23	0.265829	0.35	0.115	2.7656e-19
MRPL20	2.08225e-23	0.328905	0.454	0.202	2.79938e-19
COX7C	2.08393e-23	0.399831	0.766	0.603	2.80164e-19
RPS3	2.19828e-23	0.357841	0.987	0.984	2.95537e-19
NEDD8	2.35084e-23	0.304587	0.487	0.233	3.16047e-19
SRSF7	2.72265e-23	0.306495	0.487	0.222	3.66034e-19
TCEB1	2.90029e-23	0.277384	0.36	0.125	3.89916e-19
PSMB8	2.9143e-23	0.303023	0.576	0.316	3.91799e-19
LAP3	3.24416e-23	0.263056	0.368	0.128	4.36145e-19
CMSS1	4.53573e-23	0.260674	0.277	0.071	6.09784e-19
RPL29	4.56027e-23	0.364238	0.962	0.914	6.13083e-19
CORO1A	4.75972e-23	0.331383	0.655	0.402	6.39896e-19
RPS20	5.61567e-23	0.302225	0.972	0.926	7.5497e-19
MYL12A	6.2927e-23	0.286424	0.744	0.505	8.4599e-19
HNRNPU	6.4698e-23	0.259259	0.419	0.168	8.698e-19
NDUFB7	6.74341e-23	0.31865	0.414	0.173	9.06583e-19
SOCS1	7.53936e-23	0.305029	0.371	0.138	1.01359e-18
HNRNPDL	7.68882e-23	0.333503	0.569	0.315	1.03369e-18
EDF1	9.82369e-23	0.294926	0.609	0.358	1.3207e-18
RPL18	1.12478e-22	0.328093	0.967	0.939	1.51216e-18
RPL13A	1.19117e-22	0.319436	1	0.997	1.60141e-18
VDAC1	1.23252e-22	0.276877	0.33	0.108	1.65701e-18
RPL32	1.66929e-22	0.285738	0.997	0.999	2.24419e-18
SEC11C	1.68412e-22	0.271217	0.348	0.115	2.26413e-18
LDHB	4.28132e-22	0.37021	0.558	0.318	5.75581e-18
MRPL12	4.40831e-22	0.258182	0.269	0.07	5.92654e-18
HLA-DQA1	1.13918e-21	0.323612	0.602	0.363	1.53151e-17
DDX39A	1.28352e-21	0.258973	0.36	0.129	1.72556e-17
RPL26	1.35311e-21	0.359672	0.99	0.98	1.81912e-17
RPS14	1.65733e-21	0.284417	0.997	0.997	2.22812e-17
RPS4X	1.78229e-21	0.307953	0.975	0.969	2.39611e-17
MRPL23	2.08124e-21	0.291841	0.429	0.19	2.79802e-17
RPL21	2.11421e-21	0.280891	1	0.999	2.84235e-17
RPS28	2.36328e-21	0.298169	0.995	0.992	3.17719e-17
SLC25A3	2.47068e-21	0.289205	0.457	0.207	3.32158e-17
BIRC3	2.53369e-21	0.319574	0.419	0.183	3.40629e-17
AURKAIP1	2.94158e-21	0.276771	0.363	0.137	3.95465e-17
CCT2	2.98887e-21	0.267487	0.33	0.113	4.01824e-17
RPS3A	3.82024e-21	0.358768	0.959	0.947	5.13593e-17
HSP90B1	3.91423e-21	0.316792	0.426	0.189	5.26229e-17
U2AF1	3.96265e-21	0.292355	0.482	0.236	5.32739e-17
EIF1AX	4.25435e-21	0.267316	0.33	0.113	5.71955e-17
ARPC5L	4.82324e-21	0.265814	0.393	0.16	6.48436e-17
POLR2I	6.72024e-21	0.257587	0.373	0.143	9.03469e-17
DAD1	7.3033e-21	0.28449	0.447	0.206	9.81856e-17
COPE	1.05027e-20	0.255666	0.454	0.214	1.41199e-16
MT-ND2	1.25669e-20	0.322501	0.815	0.68	1.68949e-16
FBL	1.90395e-20	0.257629	0.386	0.158	2.55967e-16
LSM3	2.62163e-20	0.251079	0.373	0.149	3.52452e-16
TMBIM6	2.67983e-20	0.258893	0.452	0.214	3.60277e-16
NDUFA3	2.70423e-20	0.29746	0.543	0.305	3.63557e-16
TRMT112	4.8714e-20	0.304562	0.622	0.39	6.54911e-16
RPL31	6.9867e-20	0.291752	0.987	0.97	9.39291e-16
BRK1	7.01259e-20	0.252789	0.503	0.253	9.42772e-16
OST4	8.68663e-20	0.288181	0.711	0.496	1.16783e-15
PGAM1	1.0242e-19	0.274091	0.398	0.172	1.37693e-15
NDUFA1	1.07744e-19	0.27788	0.586	0.355	1.44851e-15
PSMB5	1.63449e-19	0.253351	0.279	0.086	2.19741e-15
PSMA1	1.70029e-19	0.257031	0.378	0.158	2.28587e-15
RPS18	2.1643e-19	0.371724	1	0.996	2.90969e-15
DDX18	2.20173e-19	0.282984	0.485	0.249	2.96001e-15
HMGN1	2.44646e-19	0.268772	0.541	0.298	3.28903e-15
HNRNPC	3.33933e-19	0.309131	0.49	0.259	4.48939e-15
IMPDH2	3.72574e-19	0.272945	0.315	0.113	5.00888e-15
DCTPP1	3.7499e-19	0.256406	0.299	0.103	5.04137e-15
SRRM1	4.33071e-19	0.264467	0.454	0.222	5.82221e-15
CSTB	4.35054e-19	0.274569	0.444	0.217	5.84887e-15
RSL1D1	4.395e-19	0.282014	0.376	0.162	5.90864e-15
UQCRH	8.13597e-19	0.273783	0.515	0.279	1.0938e-14
EIF3K	2.22168e-18	0.294159	0.541	0.317	2.98682e-14
MS4A1	3.61597e-18	0.260152	0.635	0.416	4.86132e-14
RPL3	3.98277e-18	0.299005	0.987	0.977	5.35444e-14
SUMO2	6.52387e-18	0.284994	0.558	0.342	8.77069e-14
MT-ATP6	8.21965e-18	0.296662	0.865	0.797	1.10505e-13
C19orf53	8.46231e-18	0.263819	0.464	0.242	1.13767e-13
PCBP1	1.89528e-17	0.257461	0.503	0.289	2.54802e-13
MT-ND4	2.48355e-17	0.27801	0.929	0.851	3.33889e-13
ATP5O	3.15926e-17	0.27264	0.49	0.271	4.24731e-13
NDUFS5	3.60477e-17	0.30304	0.454	0.239	4.84626e-13
ST13	4.68917e-17	0.258687	0.426	0.216	6.30412e-13
SAP18	8.14569e-17	0.265996	0.5	0.287	1.09511e-12
ARPC1B	9.0329e-17	0.26212	0.459	0.244	1.21438e-12
RPS15A	9.90816e-17	0.270461	0.975	0.976	1.33205e-12
DYNLL1	1.10999e-16	0.310709	0.51	0.292	1.49227e-12
CALM1	2.13368e-16	0.276115	0.48	0.263	2.86852e-12
SOD1	2.81311e-16	0.280353	0.475	0.268	3.78195e-12
YWHAE	4.04338e-16	0.265672	0.294	0.114	5.43591e-12
ATP5G2	4.33783e-16	0.317409	0.614	0.464	5.83178e-12
NMT1	5.31244e-16	0.252273	0.431	0.226	7.14204e-12
COX8A	8.0486e-16	0.256655	0.429	0.226	1.08205e-11
H2AFZ	9.99669e-16	0.327614	0.447	0.244	1.34395e-11
HMGN2	1.11676e-15	0.251992	0.612	0.415	1.50137e-11
IRF1	1.39053e-15	0.25467	0.51	0.301	1.86942e-11
PGK1	2.04162e-15	0.261267	0.404	0.206	2.74476e-11
HNRNPK	2.30309e-15	0.255908	0.485	0.276	3.09627e-11
LSM7	3.15441e-15	0.264445	0.505	0.313	4.2408e-11
SOD2	3.77689e-15	0.253585	0.368	0.178	5.07765e-11
MT-CO3	4.32241e-15	0.255144	0.975	0.967	5.81105e-11
SLC25A6	6.07942e-15	0.278654	0.711	0.533	8.17318e-11
TBCA	1.69983e-14	0.259423	0.5	0.303	2.28525e-10
PABPC1	2.84927e-14	0.255497	0.673	0.515	3.83055e-10
OAZ1	3.41346e-14	0.278766	0.825	0.732	4.58906e-10
ATP5B	8.58576e-14	0.25098	0.462	0.271	1.15427e-09
MT-ND1	5.3902e-12	0.258991	0.774	0.694	7.24659e-08
ATP5D	6.57431e-11	0.268952	0.459	0.302	8.83851e-07
CCL3	1.41961e-08	0.420187	0.437	0.303	0.000190853
CCL4	1.0209e-06	0.318149	0.368	0.247	0.0137249

## Sheet: NK_AntiCD3
	p_val	avg_logFC	pct.1	pct.2	p_val_adj
GZMB	2.61766e-193	1.44007	0.976	0.703	3.16554e-189
CITE-CD69-GTCTCTTGGCTTAAA	4.40721e-182	1.19545	1	0.997	5.32963e-178
B2M	4.27485e-143	0.333002	1	1	5.16957e-139
CCL3	2.44629e-117	1.7204	0.746	0.307	2.9583e-113
CCL4	7.55925e-104	1.53351	0.779	0.393	9.1414e-100
TMSB10	3.39248e-88	0.3945	0.99	0.941	4.10253e-84
PSME2	2.60843e-85	0.493445	0.751	0.37	3.15437e-81
GZMA	2.00543e-84	0.600229	0.853	0.537	2.42517e-80
ACTB	3.21057e-78	0.395134	0.993	0.953	3.88254e-74
EIF1	5.83969e-73	0.384433	0.902	0.677	7.06193e-69
HLA-B	2.25943e-71	0.317897	0.992	0.932	2.73233e-67
ISG20	7.75279e-69	0.428705	0.66	0.281	9.37545e-65
HLA-A	8.00444e-69	0.320167	0.979	0.901	9.67977e-65
HLA-C	9.28161e-66	0.324526	0.976	0.894	1.12243e-61
GNLY	2.61401e-61	0.522449	0.927	0.869	3.16112e-57
ISG15	1.52223e-58	0.489037	0.691	0.331	1.84084e-54
CEBPB	4.33612e-58	0.250275	0.295	0.034	5.24367e-54
PFN1	3.21178e-54	0.322791	0.932	0.81	3.884e-50
CD48	5.83668e-54	0.358994	0.467	0.149	7.0583e-50
MYL6	1.03584e-53	0.329323	0.86	0.666	1.25264e-49
HOPX	1.48768e-53	0.399735	0.577	0.248	1.79905e-49
PRF1	7.60141e-53	0.34275	0.627	0.289	9.19238e-49
PSMB9	1.84013e-52	0.341414	0.704	0.397	2.22527e-48
NKG7	1.17644e-49	0.303159	0.948	0.856	1.42267e-45
IFIT3	1.82437e-49	0.267612	0.29	0.045	2.20621e-45
SEC61G	2.36625e-49	0.402877	0.526	0.214	2.86151e-45
SEC61B	2.886e-49	0.374375	0.533	0.221	3.49004e-45
GBP1	1.27552e-48	0.265037	0.309	0.057	1.54248e-44
PSME1	2.20868e-48	0.323324	0.775	0.505	2.67096e-44
FCER1G	2.64256e-48	0.412356	0.691	0.408	3.19564e-44
RNF213	3.5129e-48	0.315689	0.619	0.299	4.24814e-44
XCL2	4.58609e-48	0.680213	0.37	0.099	5.54596e-44
PDIA3	3.14301e-47	0.292139	0.474	0.17	3.80084e-43
ATP5E	3.35784e-47	0.309936	0.827	0.625	4.06064e-43
IFITM1	2.61037e-42	0.313774	0.888	0.706	3.15672e-38
CALR	4.84455e-42	0.273589	0.388	0.12	5.85852e-38
IFI6	8.76584e-42	0.350039	0.537	0.237	1.06005e-37
HSPA5	2.79795e-41	0.250748	0.36	0.103	3.38356e-37
CCL4L2	3.2088e-41	0.620975	0.195	0.018	3.8804e-37
FKBP2	5.48071e-41	0.279559	0.376	0.117	6.62782e-37
SELK	1.96356e-39	0.293814	0.433	0.165	2.37453e-35
MANF	4.86165e-39	0.261383	0.355	0.107	5.87919e-35
SDF2L1	1.72151e-38	0.283819	0.347	0.104	2.08182e-34
RPL36AL	2.09717e-38	0.279763	0.796	0.577	2.53611e-34
ACTG1	2.78535e-38	0.31931	0.748	0.52	3.36832e-34
TNFSF10	1.9871e-37	0.250018	0.311	0.083	2.403e-33
TNFRSF18	2.36208e-37	0.250497	0.305	0.078	2.85647e-33
MYL12A	2.59014e-37	0.316443	0.746	0.516	3.13226e-33
NFKBIA	5.96907e-35	0.286427	0.428	0.175	7.21839e-31
LY6E	8.96653e-35	0.298373	0.682	0.436	1.08432e-30
COX17	9.76748e-35	0.265147	0.432	0.178	1.18118e-30
HSP90AA1	2.1179e-34	0.313871	0.593	0.339	2.56117e-30
MT2A	4.55104e-34	0.355326	0.594	0.332	5.50357e-30
UBB	7.8718e-34	0.280086	0.764	0.563	9.51936e-30
EIF4A1	1.15266e-33	0.30327	0.65	0.401	1.39391e-29
POLR2L	7.59862e-33	0.27648	0.528	0.273	9.18901e-29
BST2	7.94213e-33	0.26757	0.492	0.238	9.60442e-29
CFL1	1.19753e-32	0.262475	0.777	0.59	1.44817e-28
SRGN	3.12145e-32	0.276807	0.678	0.452	3.77478e-28
SSR4	4.55812e-32	0.271302	0.52	0.265	5.51214e-28
NDUFB2	5.35254e-32	0.25116	0.476	0.221	6.47282e-28
COX7A2	8.63274e-32	0.257089	0.607	0.36	1.04396e-27
MIF	2.03619e-31	0.35163	0.607	0.377	2.46237e-27
TYMP	2.40191e-31	0.259759	0.417	0.179	2.90463e-27
PPIB	6.45763e-31	0.265771	0.48	0.233	7.80921e-27
XCL1	1.98638e-30	0.627073	0.298	0.099	2.40213e-26
POMP	3.65659e-30	0.27034	0.49	0.247	4.42192e-26
HSP90AB1	3.86872e-27	0.307316	0.64	0.424	4.67845e-23
TUBA1B	1.88943e-25	0.255894	0.549	0.324	2.28489e-21
IFNG	7.67984e-22	0.904933	0.378	0.194	9.28723e-18
CCL3L1	3.30511e-20	0.260099	0.091	0.007	3.99687e-16
AC092580.4	3.12606e-17	0.251537	0.295	0.137	3.78035e-13
IL32	1.19417e-16	0.341131	0.599	0.469	1.44411e-12
CSF2	3.96562e-16	0.626947	0.119	0.026	4.79562e-12
LTB	2.17888e-12	0.253508	0.37	0.232	2.63492e-08

## Sheet: CD8T_Naive_AntiCD3
	p_val	avg_logFC	pct.1	pct.2	p_val_adj
CITE-CD69-GTCTCTTGGCTTAAA	0	2.90317	1	0.997	0
GAPDH	0	2.20177	1	0.626	0
GZMB	0	2.17468	0.988	0.543	0
HSPE1	0	2.08243	1	0.356	0
FABP5	0	2.01138	0.997	0.191	0
HSP90AB1	0	1.98101	1	0.587	0
HSP90AA1	0	1.97205	1	0.416	0
MIF	0	1.9091	1	0.605	0
NCL	0	1.8979	1	0.461	0
TUBA1B	0	1.88038	1	0.353	0
ENO1	0	1.87994	1	0.488	0
NPM1	0	1.87603	1	0.777	0
YBX1	0	1.84995	1	0.598	0
RAN	0	1.79818	1	0.402	0
SERBP1	0	1.79426	0.998	0.304	0
PTMA	0	1.77035	1	0.976	0
HSPD1	0	1.76902	0.992	0.258	0
EIF5A	0	1.69854	0.98	0.208	0
EIF4A1	0	1.69405	0.998	0.48	0
SNRPG	0	1.68458	0.998	0.314	0
LDHA	0	1.67782	1	0.333	0
CHCHD2	0	1.67563	1	0.433	0
CYCS	0	1.66317	0.985	0.193	0
NME1-NME2	0	1.64198	0.997	0.275	0
TXN	0	1.6394	0.995	0.258	0
RANBP1	0	1.63573	0.995	0.204	0
TPI1	0	1.62997	0.997	0.399	0
SLC25A5	0	1.61142	0.992	0.247	0
SLIRP	0	1.61087	0.995	0.19	0
SNRPE	0	1.59964	0.993	0.265	0
PSME2	0	1.59526	1	0.381	0
PFN1	0	1.5952	1	0.808	0
C1QBP	0	1.59425	0.993	0.326	0
PA2G4	0	1.58585	0.995	0.292	0
NME1	0	1.58506	0.988	0.138	0
RPL37A	0	1.58035	1	0.986	0
POMP	0	1.57548	1	0.224	0
RPS26	0	1.56698	1	0.799	0
RPLP0	0	1.55548	1	0.899	0
SNRPD1	0	1.55469	0.988	0.201	0
ACTG1	0	1.55387	1	0.523	0
UQCRQ	0	1.54557	0.995	0.326	0
ALDOA	0	1.53674	1	0.456	0
ATP5G3	0	1.52437	0.987	0.25	0
SET	0	1.52118	0.995	0.356	0
HMGB1	0	1.52069	0.997	0.481	0
PSMA7	0	1.5077	0.997	0.321	0
PPIA	0	1.50764	1	0.552	0
ACTB	0	1.50229	1	0.973	0
HSPA8	0	1.50033	1	0.452	0
RBM8A	0	1.49599	0.992	0.237	0
DDX21	0	1.48644	0.972	0.151	0
PPA1	0	1.47632	0.985	0.184	0
TUBB	0	1.47564	0.99	0.306	0
RPL7A	0	1.47518	1	0.838	0
H3F3B	0	1.46649	0.998	0.585	0
MIR155HG	0	1.46291	0.95	0.116	0
PRDX1	0	1.45947	0.985	0.198	0
EIF2S2	0	1.44682	0.99	0.271	0
SRM	0	1.44353	0.972	0.173	0
HNRNPA1	0	1.44145	1	0.658	0
H2AFZ	0	1.43983	0.982	0.273	0
RPL5	0	1.42888	1	0.879	0
SNRPF	0	1.42713	0.982	0.238	0
USMG5	0	1.42622	0.992	0.298	0
RPS7	0	1.42337	1	0.927	0
RPL23	0	1.41856	1	0.846	0
SUB1	0	1.41139	0.997	0.3	0
RPS24	0	1.40666	1	0.952	0
PSME1	0	1.39706	0.998	0.492	0
PKM	0	1.39653	0.993	0.3	0
GSTP1	0	1.39334	0.987	0.248	0
NHP2L1	0	1.39289	0.99	0.247	0
OAZ1	0	1.391	0.998	0.576	0
RPL35	0	1.38736	1	0.988	0
RPS5	0	1.38512	1	0.974	0
RPL29	0	1.38348	1	0.959	0
EIF5B	0	1.38341	0.985	0.247	0
RPL6	0	1.38003	1	0.947	0
RPS16	0	1.37031	1	0.968	0
EIF5AL1	0	1.36509	0.898	0.086	0
RPSA	0	1.36414	1	0.823	0
TIMM13	0	1.36131	0.962	0.172	0
SNRPB	0	1.3605	0.972	0.214	0
FTL	0	1.36048	1	0.954	0
RPSAP58	0	1.35622	0.998	0.724	0
DUT	0	1.34274	0.874	0.135	0
LDHB	0	1.34226	1	0.636	0
POLR2L	0	1.34191	0.998	0.312	0
CFL1	0	1.33969	1	0.607	0
TOMM5	0	1.33943	0.952	0.155	0
RPS11	0	1.3394	1	0.858	0
PGAM1	0	1.33756	0.962	0.175	0
RPL27	0	1.33373	1	0.945	0
CBX3	0	1.33349	0.987	0.268	0
GNB2L1	0	1.33258	1	0.893	0
HNRNPM	0	1.33246	0.987	0.234	0
TMA7	0	1.32983	1	0.763	0
PSMB1	0	1.32723	0.987	0.288	0
RPL17	0	1.32668	1	0.957	0
RPS2	0	1.3225	1	0.998	0
EIF3J	0	1.3213	0.97	0.157	0
PSMB3	0	1.31539	0.98	0.247	0
NHP2	0	1.31355	0.985	0.209	0
SRSF3	0	1.31258	0.964	0.215	0
RPL22L1	0	1.31118	0.922	0.112	0
FAU	0	1.3102	1	0.945	0
NOP10	0	1.30991	0.985	0.24	0
TCEB2	0	1.30854	0.995	0.43	0
NDUFAB1	0	1.30812	0.974	0.172	0
SSBP1	0	1.30653	0.975	0.219	0
NACA	0	1.30518	1	0.805	0
PRMT1	0	1.30498	0.962	0.164	0
COX7A2	0	1.30207	0.992	0.423	0
PFDN2	0	1.30122	0.965	0.17	0
NDUFA4	0	1.29956	1	0.415	0
RPS8	0	1.29809	1	0.996	0
PRELID1	0	1.29743	0.965	0.192	0
RPS21	0	1.29706	1	0.974	0
COX7B	0	1.29659	0.983	0.266	0
ERH	0	1.29581	0.969	0.244	0
CALM2	0	1.2941	0.993	0.361	0
SLC25A6	0	1.2939	0.995	0.496	0
ATP5J	0	1.29333	0.979	0.257	0
RPL24	0	1.28911	1	0.862	0
COX6A1	0	1.28827	0.988	0.289	0
RPL14	0	1.28717	1	0.966	0
ATP5J2	0	1.28513	0.982	0.292	0
RPL37	0	1.28399	1	0.985	0
CCT6A	0	1.2839	0.952	0.115	0
SRP14	0	1.28296	0.997	0.543	0
RPL15	0	1.28082	1	0.984	0
TRMT112	0	1.27818	0.99	0.323	0
RPS10	0	1.2776	1	0.874	0
RPL26	0	1.27575	1	0.992	0
HINT1	0	1.27517	1	0.587	0
RPS23	0	1.2678	1	0.997	0
ATP5I	0	1.26692	0.995	0.457	0
HMGN2	0	1.26556	0.965	0.297	0
BTF3	0	1.26528	1	0.796	0
RPL18A	0	1.26405	1	1	0
RPLP1	0	1.26352	1	1	0
ATP5G1	0	1.26338	0.967	0.171	0
RPL28	0	1.26337	1	0.993	0
COX5A	0	1.26312	0.959	0.165	0
PARK7	0	1.25901	0.988	0.292	0
CD48	0	1.25807	0.853	0.171	0
RPL8	0	1.25723	1	0.969	0
EIF1	0	1.2572	0.998	0.783	0
SUMO2	0	1.25111	0.979	0.3	0
COX6B1	0	1.24888	0.993	0.451	0
HNRNPAB	0	1.24621	0.934	0.144	0
UBB	0	1.23786	0.997	0.484	0
MRPL20	0	1.23459	0.977	0.203	0
ZNF706	0	1.23436	0.942	0.182	0
METAP2	0	1.23066	0.944	0.162	0
TMSB10	0	1.22727	1	0.98	0
HMGN1	0	1.22565	0.979	0.271	0
IL2RA	0	1.2252	0.907	0.133	0
COX7C	0	1.22507	0.998	0.717	0
SNRPD2	0	1.22497	0.998	0.505	0
RPL4	0	1.22312	1	0.834	0
HNRNPA2B1	0	1.22227	0.982	0.33	0
MYL6	0	1.21937	0.998	0.591	0
RPS9	0	1.21787	1	0.984	0
NAP1L1	0	1.21749	0.979	0.402	0
CHCHD10	0	1.21555	0.917	0.109	0
APRT	0	1.21364	0.993	0.384	0
RPL36A	0	1.21151	1	0.955	0
RPL36	0	1.20687	1	0.998	0
PHB	0	1.20443	0.94	0.147	0
DDX18	0	1.20431	0.967	0.252	0
RPL38	0	1.20181	1	0.966	0
SRSF9	0	1.20166	0.964	0.217	0
ATP5E	0	1.19843	1	0.746	0
LSM7	0	1.19842	0.98	0.241	0
RGCC	0	1.19577	0.815	0.137	0
NDUFS6	0	1.19437	0.96	0.153	0
UQCRH	0	1.19417	0.982	0.312	0
EEF1B2	0	1.19326	1	0.729	0
RPS13	0	1.19218	1	0.994	0
MRPL52	0	1.19145	0.944	0.147	0
UBA52	0	1.19134	1	0.92	0
C14orf2	0	1.19115	0.98	0.38	0
NDUFA13	0	1.19019	0.988	0.323	0
SHFM1	0	1.18995	0.962	0.198	0
MINOS1	0	1.18948	0.957	0.217	0
RBX1	0	1.18924	0.982	0.292	0
HNRNPC	0	1.18873	0.979	0.29	0
SEC61B	0	1.18744	0.964	0.201	0
EMP3	0	1.18615	0.975	0.345	0
RPL7	0	1.18591	1	0.992	0
CORO1A	0	1.18552	0.975	0.405	0
RPL9	0	1.18422	1	0.962	0
DNAJA1	0	1.18333	0.932	0.142	0
CD2	0	1.1781	0.967	0.256	0
COX17	0	1.17648	0.947	0.161	0
ANP32B	0	1.17561	0.939	0.211	0
RPS18	0	1.17539	1	1	0
NUDC	0	1.17452	0.944	0.147	0
EIF1AX	0	1.17399	0.927	0.148	0
RPL18	0	1.17073	1	0.971	0
SRSF7	0	1.16915	0.955	0.212	0
RPL22	0	1.16735	1	0.893	0
U2AF1	0	1.16654	0.94	0.217	0
PSMB8	0	1.16269	0.965	0.247	0
MRPL23	0	1.16193	0.936	0.147	0
ATP5D	0	1.16164	0.975	0.292	0
NDUFS5	0	1.15583	0.974	0.349	0
DYNLL1	0	1.15548	0.94	0.16	0
GADD45GIP1	0	1.15425	0.942	0.191	0
ATP5L	0	1.15101	0.998	0.679	0
PSMA5	0	1.14985	0.95	0.157	0
COX6A1P2	0	1.14876	0.957	0.164	0
PCNA	0	1.14849	0.851	0.065	0
HMGA1	0	1.1472	0.902	0.098	0
VDAC1	0	1.14597	0.888	0.092	0
RPS12	0	1.14541	1	0.997	0
SNRPB2	0	1.14499	0.949	0.158	0
RPL19	0	1.14426	1	0.995	0
RPS3A	0	1.14156	1	0.986	0
FAM96B	0	1.13915	0.931	0.134	0
MT-CO2	0	1.13754	1	0.963	0
CD3D	0	1.13676	0.993	0.527	0
SERF2	0	1.13488	1	0.755	0
RPS3	0	1.13435	1	0.995	0
RPL10A	0	1.1343	1	0.959	0
UQCR10	0	1.13298	0.972	0.3	0
CLIC1	0	1.13244	0.924	0.138	0
ATP5B	0	1.13223	0.965	0.258	0
RPL27A	0	1.1314	1	0.995	0
ARPC2	0	1.131	0.988	0.37	0
TCEB1	0	1.13034	0.936	0.121	0
UBL5	0	1.1291	0.983	0.38	0
EEF1A1	0	1.12876	1	0.997	0
WDR43	0	1.12824	0.901	0.114	0
SH3BGRL3	0	1.1251	0.987	0.477	0
NOP56	0	1.12486	0.917	0.129	0
RPS20	0	1.12399	1	0.971	0
CALR	0	1.12188	0.939	0.158	0
RPL41	0	1.12182	1	1	0
PSMB6	0	1.12104	0.94	0.166	0
COX6C	0	1.12042	0.993	0.441	0
MRPL41	0	1.11883	0.919	0.141	0
SEC61G	0	1.117	0.957	0.229	0
RPL13A	0	1.11523	1	1	0
TOMM22	0	1.11226	0.931	0.134	0
DDX39A	0	1.11211	0.932	0.117	0
RPS15	0	1.11132	1	0.999	0
CCT2	0	1.10956	0.919	0.121	0
LSM5	0	1.10598	0.936	0.203	0
TBCA	0	1.10406	0.959	0.339	0
TPM3	0	1.10225	0.959	0.267	0
TUFM	0	1.10139	0.922	0.132	0
PSMA3	0	1.10104	0.934	0.14	0
CMSS1	0	1.09568	0.874	0.093	0
PGK1	0	1.0943	0.937	0.208	0
ZNF593	0	1.09325	0.879	0.072	0
RPS6	0	1.09283	1	0.998	0
XRCC5	0	1.09232	0.932	0.176	0
NDUFA11	0	1.0904	0.955	0.212	0
JTB	0	1.09038	0.932	0.187	0
PSMB5	0	1.08788	0.868	0.091	0
PDCD5	0	1.08745	0.899	0.108	0
MANF	0	1.08707	0.899	0.108	0
NDUFB2	0	1.08575	0.969	0.267	0
RPS19	0	1.08536	1	1	0
SRSF2	0	1.08482	0.896	0.133	0
CCT3	0	1.08381	0.919	0.141	0
MRPL12	0	1.08326	0.876	0.074	0
HNRNPDL	0	1.08284	0.967	0.314	0
RBMX	0	1.08216	0.931	0.23	0
AURKAIP1	0	1.08163	0.942	0.151	0
LAMTOR5	0	1.08156	0.944	0.176	0
TMEM258	0	1.07916	0.977	0.328	0
COX8A	0	1.07625	0.937	0.179	0
RPL35A	0	1.07052	1	0.994	0
CCND2	0	1.07029	0.876	0.084	0
LSM3	0	1.0691	0.922	0.155	0
RPL36AL	0	1.06789	0.997	0.651	0
RPL12	0	1.06787	1	0.987	0
DCTPP1	0	1.06716	0.883	0.092	0
UBE2L3	0	1.06572	0.939	0.146	0
COX5B	0	1.0657	0.98	0.356	0
PSMB2	0	1.0627	0.917	0.118	0
CD7	0	1.06225	0.916	0.191	0
SF3B5	0	1.06141	0.932	0.189	0
PPIB	0	1.06044	0.952	0.242	0
RGS10	0	1.05962	0.944	0.297	0
CCT5	0	1.05959	0.896	0.101	0
RPLP2	0	1.05933	1	0.997	0
GNG5	0	1.05807	0.937	0.169	0
ABRACL	0	1.05733	0.939	0.193	0
RPS4X	0	1.05586	1	0.992	0
C19orf53	0	1.05572	0.95	0.275	0
SOD1	0	1.05526	0.977	0.39	0
SAP18	0	1.05212	0.964	0.273	0
GUK1	0	1.05048	0.947	0.215	0
RPS27A	0	1.05026	1	0.999	0
NDUFV2	0	1.0494	0.919	0.19	0
RPL11	0	1.04937	1	0.997	0
PSMA4	0	1.04935	0.932	0.136	0
SDF2L1	0	1.04902	0.878	0.108	0
ILF2	0	1.04898	0.904	0.106	0
UBE2D3	0	1.04869	0.952	0.226	0
MZT2B	0	1.04794	0.964	0.317	0
B2M	0	1.04724	1	1	0
EIF3I	0	1.04681	0.901	0.124	0
NOP16	0	1.04607	0.866	0.078	0
RPL39	0	1.04532	1	0.996	0
CCT8	0	1.04301	0.898	0.117	0
HLA-A	0	1.04041	1	0.816	0
RPS25	0	1.03967	1	0.995	0
PSMA1	0	1.03948	0.912	0.15	0
MT1X	0	1.03775	0.873	0.133	0
RSL1D1	0	1.03634	0.932	0.234	0
TXNDC17	0	1.03556	0.922	0.082	0
RPS28	0	1.03458	1	0.999	0
CCDC85B	0	1.0323	0.871	0.165	0
PPP1R14B	0	1.03183	0.863	0.058	0
CACYBP	0	1.03155	0.869	0.133	0
ROMO1	0	1.03069	0.931	0.175	0
NPM3	0	1.03047	0.858	0.087	0
MAGOH	0	1.03042	0.914	0.138	0
NEDD8	0	1.02849	0.939	0.259	0
EBNA1BP2	0	1.02833	0.851	0.065	0
DBI	0	1.02742	0.945	0.201	0
DUSP2	0	1.02735	0.76	0.056	0
NDUFC2	0	1.02563	0.907	0.156	0
CNBP	0	1.02453	0.97	0.36	0
C11orf48	0	1.02408	0.904	0.11	0
PSMC3	0	1.02287	0.889	0.112	0
HLA-B	0	1.02081	1	0.882	0
MYEOV2	0	1.02067	0.949	0.221	0
ARPC3	0	1.01912	0.962	0.349	0
SLC25A3	0	1.01876	0.916	0.223	0
PSMB7	0	1.01498	0.899	0.126	0
HSP90B1	0	1.01456	0.931	0.21	0
CCND3	0	1.01302	0.878	0.129	0
EEF1E1	0	1.01226	0.855	0.079	0
PSMB10	0	1.01195	0.916	0.21	0
HNRNPD	0	1.01031	0.906	0.189	0
TIMM8B	0	1.00988	0.888	0.104	0
YWHAE	0	1.00905	0.873	0.11	0
STRA13	0	1.00384	0.855	0.068	0
LY6E	0	1.001	0.937	0.288	0
NDUFB9	0	0.999159	0.942	0.257	0
PTGES3	0	0.999024	0.886	0.138	0
YWHAB	0	0.998644	0.947	0.255	0
GTF3C6	0	0.998349	0.878	0.117	0
NSA2	0	0.997136	0.898	0.153	0
EIF3K	0	0.997101	0.975	0.365	0
MRPL51	0	0.996694	0.894	0.15	0
RPL10	0	0.995793	1	1	0
NBEAL1	0	0.99441	1	0.959	0
HNRNPK	0	0.99405	0.954	0.273	0
FBL	0	0.993449	0.927	0.255	0
MRPS34	0	0.989256	0.848	0.115	0
NDUFA6	0	0.988049	0.873	0.136	0
CCT4	0	0.986755	0.901	0.125	0
HNRNPU	0	0.986633	0.861	0.179	0
MRP63	0	0.984724	0.898	0.155	0
SPCS1	0	0.984172	0.919	0.24	0
FKBP1A	0	0.983398	0.879	0.109	0
ARPC5L	0	0.983194	0.874	0.101	0
SNRPA1	0	0.983061	0.863	0.105	0
RPS29	0	0.981525	1	1	0
POLR2I	0	0.981108	0.869	0.135	0
PSMD8	0	0.977175	0.886	0.141	0
RPL23A	0	0.9763	1	0.999	0
NDUFB7	0	0.972776	0.917	0.159	0
DAD1	0	0.971541	0.929	0.24	0
DEK	0	0.971509	0.798	0.103	0
PDAP1	0	0.966928	0.85	0.1	0
ATP6V0B	0	0.966273	0.853	0.119	0
NOL7	0	0.965203	0.878	0.136	0
SF3B14	0	0.964443	0.901	0.159	0
TOMM40	0	0.963911	0.818	0.068	0
POLR2F	0	0.962631	0.841	0.095	0
C17orf89	0	0.961236	0.853	0.127	0
BOLA3	0	0.95951	0.853	0.067	0
MRPS18C	0	0.959357	0.883	0.101	0
NDUFA3	0	0.959274	0.964	0.357	0
GTF2A2	0	0.957128	0.879	0.129	0
TAF9	0	0.956285	0.869	0.113	0
PSMD7	0	0.955199	0.836	0.102	0
ABCF1	0	0.951217	0.876	0.131	0
STOML2	0	0.950584	0.831	0.075	0
GNL3	0	0.949992	0.84	0.095	0
SNRPD3	0	0.94789	0.86	0.13	0
RPL3	0	0.947163	1	0.996	0
DDX1	0	0.944952	0.823	0.102	0
RPS19BP1	0	0.943489	0.864	0.108	0
UQCRFS1	0	0.941379	0.881	0.142	0
ENY2	0	0.940763	0.879	0.14	0
NDUFB10	0	0.940312	0.873	0.163	0
C19orf70	0	0.940022	0.917	0.196	0
TCP1	0	0.938758	0.878	0.103	0
ATP5C1	0	0.936491	0.871	0.132	0
CDK4	0	0.934843	0.821	0.074	0
GRPEL1	0	0.933374	0.84	0.071	0
RPL32	0	0.932128	1	0.999	0
MRPS12	0	0.931687	0.848	0.088	0
VDAC2	0	0.931581	0.84	0.113	0
NAA10	0	0.930787	0.826	0.089	0
C11orf58	0	0.928706	0.934	0.257	0
EIF6	0	0.928672	0.866	0.141	0
CIB1	0	0.928511	0.871	0.181	0
MYC	0	0.928361	0.79	0.121	0
RBM17	0	0.92772	0.833	0.083	0
RBM3	0	0.927331	0.922	0.219	0
SUPT16H	0	0.926974	0.825	0.081	0
DKC1	0	0.925482	0.846	0.098	0
YWHAQ	0	0.924987	0.855	0.089	0
LSM2	0	0.924939	0.826	0.099	0
FKBP11	0	0.924836	0.864	0.125	0
CCT7	0	0.921446	0.864	0.115	0
RPL13	0	0.921086	1	0.999	0
PHB2	0	0.920831	0.833	0.101	0
GPATCH4	0	0.920718	0.802	0.064	0
TALDO1	0	0.919981	0.861	0.13	0
C8orf33	0	0.919941	0.83	0.092	0
LSM6	0	0.916052	0.864	0.146	0
CALM3	0	0.915725	0.86	0.161	0
BZW1	0	0.915376	0.868	0.116	0
CKS2	0	0.91287	0.774	0.037	0
NUTF2	0	0.911486	0.86	0.108	0
EIF5	0	0.911195	0.845	0.133	0
RPL21	0	0.909326	1	1	0
RPL30	0	0.908376	1	0.988	0
SSSCA1	0	0.906246	0.83	0.083	0
NDUFB3	0	0.904513	0.869	0.149	0
CYC1	0	0.904222	0.826	0.09	0
NIFK	0	0.90336	0.817	0.089	0
NMT1	0	0.902672	0.873	0.172	0
PPM1G	0	0.901717	0.795	0.076	0
POLR2H	0	0.900409	0.782	0.07	0
NDUFB6	0	0.899142	0.86	0.124	0
PSMD14	0	0.896966	0.835	0.07	0
LYAR	0	0.894476	0.851	0.096	0
TIMM10	0	0.892742	0.826	0.089	0
FTH1	0	0.891304	1	0.946	0
MRTO4	0	0.890752	0.812	0.063	0
TAGLN2	0	0.890182	0.863	0.168	0
CSNK2B	0	0.887257	0.836	0.093	0
KPNB1	0	0.886679	0.81	0.096	0
LSM4	0	0.886208	0.823	0.123	0
MRPL14	0	0.884984	0.833	0.097	0
PWP1	0	0.883716	0.8	0.074	0
SNRPC	0	0.882076	0.823	0.121	0
C8orf59	0	0.881677	0.888	0.168	0
TMEM147	0	0.880855	0.818	0.1	0
IMPDH2	0	0.880735	0.82	0.119	0
RPS14	0	0.87946	1	1	0
RPS15A	0	0.879428	1	0.997	0
RPL31	0	0.87752	1	0.997	0
POLR3K	0	0.875893	0.77	0.063	0
TXNL4A	0	0.875007	0.831	0.121	0
ADRM1	0	0.870746	0.803	0.095	0
LAGE3	0	0.869067	0.767	0.097	0
MTDH	0	0.868871	0.85	0.139	0
BRIX1	0	0.868108	0.803	0.072	0
PFDN6	0	0.868023	0.797	0.087	0
C16orf13	0	0.867052	0.823	0.107	0
MRPL33	0	0.866146	0.85	0.157	0
IMP4	0	0.866019	0.798	0.07	0
C14orf166	0	0.86444	0.84	0.161	0
ANAPC11	0	0.86375	0.85	0.134	0
NOP58	0	0.863362	0.807	0.119	0
BANF1	0	0.861578	0.853	0.149	0
HNRNPA3	0	0.860257	0.858	0.153	0
TAP1	0	0.859972	0.808	0.118	0
HNRNPF	0	0.858504	0.836	0.142	0
HSPA5	0	0.857917	0.802	0.126	0
CFLAR	0	0.85572	0.797	0.116	0
UBE2I	0	0.853905	0.838	0.155	0
GSTO1	0	0.853571	0.826	0.114	0
PSMC5	0	0.85341	0.83	0.152	0
TUBB4B	0	0.85315	0.777	0.047	0
UBE2S	0	0.850061	0.732	0.04	0
EIF2S1	0	0.847698	0.772	0.065	0
SFXN1	0	0.847168	0.792	0.103	0
CKS1B	0	0.846192	0.749	0.036	0
NASP	0	0.845884	0.757	0.059	0
FAM136A	0	0.844237	0.755	0.059	0
NDUFA12	0	0.841935	0.881	0.192	0
POLR2K	0	0.840081	0.815	0.069	0
ATOX1	0	0.839379	0.779	0.077	0
MRPL4	0	0.839324	0.779	0.063	0
ZC3H15	0	0.837997	0.826	0.126	0
PSMC1	0	0.837246	0.812	0.086	0
C4orf48	0	0.836688	0.783	0.086	0
UBE2N	0	0.835337	0.805	0.093	0
MDH2	0	0.834536	0.831	0.144	0
TMA16	0	0.833863	0.75	0.051	0
NOLC1	0	0.833101	0.782	0.093	0
MRPL11	0	0.830911	0.774	0.078	0
TIMM17A	0	0.828784	0.783	0.07	0
HDDC2	0	0.827211	0.798	0.091	0
MRPL3	0	0.825687	0.798	0.089	0
COX16	0	0.823692	0.813	0.119	0
SYNCRIP	0	0.821092	0.782	0.077	0
MRPL17	0	0.818106	0.767	0.053	0
HSD17B10	0	0.81803	0.777	0.103	0
RRP7A	0	0.815187	0.76	0.075	0
SRI	0	0.814089	0.82	0.124	0
RPA3	0	0.811273	0.783	0.099	0
CNPY2	0	0.811107	0.817	0.109	0
MRPL1	0	0.810376	0.739	0.065	0
MRPS15	0	0.804405	0.782	0.072	0
STIP1	0	0.803632	0.775	0.085	0
PHPT1	0	0.803104	0.802	0.093	0
RPL26L1	0	0.802171	0.736	0.059	0
HSPA9	0	0.801926	0.749	0.079	0
NDUFS8	0	0.801458	0.845	0.143	0
CDV3	0	0.800951	0.783	0.091	0
ATP1B3	0	0.798639	0.754	0.049	0
POLR2E	0	0.7974	0.79	0.104	0
C19orf10	0	0.796422	0.82	0.12	0
CISD1	0	0.793348	0.734	0.056	0
NAA20	0	0.791276	0.798	0.106	0
NDUFS7	0	0.786541	0.812	0.121	0
MRPS7	0	0.781217	0.788	0.096	0
EMG1	0	0.781049	0.74	0.074	0
C20orf24	0	0.780927	0.762	0.092	0
MCM7	0	0.779642	0.704	0.05	0
GSPT1	0	0.777905	0.729	0.072	0
MRPS23	0	0.777406	0.742	0.076	0
KIAA0020	0	0.776234	0.729	0.065	0
MRPS26	0	0.775101	0.717	0.073	0
BATF	0	0.774536	0.736	0.077	0
EXOSC8	0	0.771355	0.719	0.071	0
MAGOHB	0	0.765912	0.727	0.049	0
PDIA6	0	0.765362	0.736	0.081	0
POLR2J	0	0.764668	0.788	0.115	0
UQCC2	0	0.763116	0.714	0.08	0
PSMC4	0	0.760989	0.722	0.065	0
YBX3	0	0.758149	0.669	0.056	0
PSMD13	0	0.75565	0.769	0.089	0
TRAPPC2L	0	0.755172	0.76	0.084	0
UTP11L	0	0.752956	0.674	0.04	0
GGCT	0	0.747694	0.696	0.044	0
RNASEH2C	0	0.746747	0.747	0.086	0
COX20	0	0.746537	0.719	0.067	0
PRDX3	0	0.7455	0.755	0.084	0
TNFSF14	0	0.745318	0.562	0.021	0
FAM162A	0	0.744983	0.76	0.101	0
DNMT1	0	0.737651	0.717	0.073	0
METTL5	0	0.736989	0.722	0.083	0
TMEM208	0	0.736673	0.731	0.065	0
MRPS24	0	0.736446	0.745	0.096	0
AHSA1	0	0.734713	0.716	0.065	0
CEBPZ	0	0.734228	0.744	0.092	0
TARS	0	0.733258	0.669	0.052	0
MRPL36	0	0.731627	0.706	0.065	0
MRPS16	0	0.731344	0.704	0.074	0
BOLA2B	0	0.730253	0.698	0.045	0
EIF4A3	0	0.728479	0.694	0.065	0
MRPL13	0	0.725883	0.702	0.052	0
NDUFAF4	0	0.723128	0.693	0.064	0
SSRP1	0	0.717818	0.678	0.059	0
LMAN1	0	0.716872	0.717	0.077	0
CCDC124	0	0.716255	0.714	0.068	0
EMC6	0	0.715342	0.731	0.072	0
UBE2T	0	0.714623	0.633	0.019	0
GTPBP4	0	0.714269	0.711	0.058	0
FKBP2	0	0.712584	0.767	0.104	0
HYPK	0	0.704343	0.729	0.053	0
MRPL22	0	0.701081	0.722	0.08	0
DTYMK	0	0.700605	0.645	0.041	0
POP7	0	0.699428	0.673	0.044	0
PNO1	0	0.696706	0.658	0.035	0
DNAJC2	0	0.696697	0.686	0.062	0
TTC1	0	0.692358	0.731	0.085	0
SLBP	0	0.692117	0.646	0.048	0
FAM207A	0	0.69201	0.648	0.041	0
PHF5A	0	0.690216	0.656	0.055	0
HSBP1	0	0.689244	0.673	0.061	0
H2AFY	0	0.688496	0.714	0.079	0
HN1	0	0.683054	0.683	0.059	0
TUBA1C	0	0.682181	0.653	0.038	0
RRP15	0	0.678481	0.678	0.059	0
PSMB4	0	0.677724	0.704	0.073	0
RPL34	0	0.676182	1	1	0
PDCD11	0	0.674835	0.643	0.045	0
MTFP1	0	0.673927	0.651	0.042	0
NTMT1	0	0.673233	0.643	0.042	0
MRPL47	0	0.671741	0.668	0.056	0
PAM16	0	0.670979	0.643	0.036	0
ODC1	0	0.666307	0.638	0.035	0
TMEM126A	0	0.664031	0.673	0.052	0
ELP5	0	0.661744	0.643	0.046	0
SRPK1	0	0.660537	0.641	0.047	0
BATF3	0	0.65902	0.569	0.02	0
FAM195A	0	0.654376	0.608	0.031	0
YIF1A	0	0.651304	0.64	0.046	0
TFAM	0	0.650384	0.653	0.051	0
DCUN1D5	0	0.649631	0.612	0.035	0
RPS27	0	0.646063	1	1	0
GMNN	0	0.645709	0.6	0.016	0
GAR1	0	0.643896	0.631	0.031	0
HDAC2	0	0.643411	0.656	0.05	0
MRPL15	0	0.636213	0.651	0.044	0
CENPV	0	0.632605	0.588	0.027	0
COPRS	0	0.625525	0.582	0.022	0
SNRNP25	0	0.625488	0.613	0.033	0
RRP9	0	0.604034	0.579	0.026	0
YRDC	0	0.60339	0.579	0.028	0
CISD2	0	0.603252	0.62	0.035	0
CLTA	6.56601e-308	0.791414	0.754	0.103	1.05214e-303
SSB	9.4945e-308	0.837276	0.81	0.138	1.5214e-303
SRRM1	9.66275e-308	0.930109	0.907	0.245	1.54836e-303
CHORDC1	1.14979e-307	0.630269	0.608	0.038	1.84242e-303
PAK1IP1	2.47241e-307	0.648999	0.615	0.041	3.9618e-303
CITE-CD278-ICOS-CGCGCACCCATTAAA	3.88325e-307	1.26871	1	1	6.22253e-303
IFITM2	1.14741e-306	0.922823	0.901	0.223	1.83861e-302
NDUFA1	1.39068e-306	0.965609	0.944	0.314	2.22842e-302
EXOSC4	4.13528e-306	0.661619	0.603	0.038	6.62637e-302
CITE-CD25-TTTGTCCTGTACGCC	4.61624e-306	1.96183	1	0.987	7.39706e-302
KRTCAP2	4.98856e-306	0.868243	0.911	0.241	7.99367e-302
TPT1	7.44599e-306	0.868901	1	0.931	1.19315e-301
MT-ND1	8.29106e-306	1.12452	0.993	0.698	1.32856e-301
CD74	1.10483e-305	1.00206	0.99	0.552	1.77037e-301
FKBP4	1.20253e-305	0.670831	0.631	0.048	1.92693e-301
MT-CO1	1.75752e-305	0.998283	1	0.947	2.81625e-301
NKG7	1.90974e-305	0.889355	0.727	0.093	3.06016e-301
MRPL55	2.57491e-305	0.785461	0.727	0.092	4.12604e-301
EEF2	1.35439e-304	1.08377	0.985	0.463	2.17028e-300
SFPQ	3.4618e-304	0.752217	0.727	0.09	5.54719e-300
RUNX3	4.38659e-304	0.688672	0.623	0.046	7.02907e-300
CDC123	6.96572e-304	0.710278	0.702	0.077	1.11619e-299
RAC1	9.20158e-304	0.818965	0.821	0.148	1.47446e-299
MT-ND4	1.04685e-303	1.00418	1	0.876	1.67748e-299
SKP1	1.10501e-303	0.970941	0.952	0.346	1.77067e-299
SIVA1	1.28735e-303	0.868011	0.815	0.149	2.06285e-299
C19orf48	1.60791e-303	0.671892	0.658	0.058	2.57652e-299
PSMD1	4.57221e-303	0.660257	0.655	0.057	7.32651e-299
C19orf24	5.61619e-303	0.762765	0.747	0.101	8.99938e-299
XRCC6	7.6808e-303	0.832429	0.823	0.154	1.23077e-298
GTF3A	1.54359e-302	0.926056	0.912	0.248	2.47345e-298
BUD31	1.63627e-302	0.704928	0.749	0.1	2.62196e-298
NUDT1	1.89198e-302	0.646648	0.626	0.047	3.03171e-298
PPP1CA	2.45816e-302	0.838363	0.841	0.172	3.93896e-298
TSTA3	4.25325e-302	0.621822	0.631	0.049	6.8154e-298
H3F3A	6.36577e-302	1.02574	0.98	0.478	1.02005e-297
CD320	8.29852e-302	0.710818	0.673	0.067	1.32975e-297
MRPL32	1.07346e-301	0.746226	0.696	0.077	1.72012e-297
ATP5F1	1.31433e-301	0.789234	0.795	0.131	2.10609e-297
ATP6V0E1	1.53702e-301	0.848915	0.914	0.251	2.46291e-297
MTCH2	1.54117e-301	0.621279	0.612	0.042	2.46957e-297
HNRNPA1L2	2.135e-301	0.684007	0.706	0.08	3.42112e-297
ARL2	2.45645e-301	0.73767	0.714	0.085	3.93621e-297
PDIA3	4.37777e-301	0.804819	0.817	0.149	7.01494e-297
GINS2	6.50064e-301	0.653464	0.557	0.027	1.04166e-296
GLRX3	1.0641e-300	0.644751	0.651	0.057	1.70511e-296
C11orf31	1.11564e-300	0.963547	0.889	0.227	1.78771e-296
MRPL21	3.04115e-300	0.720111	0.688	0.073	4.87315e-296
POLR2G	3.82677e-300	0.709601	0.731	0.094	6.13202e-296
SSR4	7.3968e-300	0.882853	0.936	0.295	1.18526e-295
NARS	7.44936e-300	0.720618	0.712	0.086	1.19368e-295
AIMP1	9.82598e-300	0.711482	0.694	0.075	1.57452e-295
MRPS21	1.2875e-299	0.889358	0.873	0.21	2.0631e-295
HSPH1	1.57488e-299	0.608371	0.621	0.046	2.52359e-295
NDUFB11	7.1459e-299	0.888085	0.916	0.265	1.14506e-294
LRRC59	2.58571e-298	0.607671	0.582	0.034	4.14334e-294
MRPL18	5.48915e-298	0.712058	0.702	0.081	8.79581e-294
HLA-C	5.5054e-298	0.945643	0.995	0.827	8.82185e-294
NDUFS3	8.21974e-298	0.709696	0.699	0.08	1.31713e-293
OST4	1.24435e-297	0.912097	0.998	0.616	1.99395e-293
NDUFA9	3.90237e-297	0.628032	0.63	0.051	6.25316e-293
NDUFAF3	6.40185e-297	0.753411	0.807	0.143	1.02583e-292
EIF3M	1.77782e-296	0.855985	0.871	0.206	2.84879e-292
IL32	2.15517e-296	1.26837	0.983	0.625	3.45344e-292
CD63	3.38172e-296	0.748081	0.785	0.129	5.41886e-292
CD3EAP	3.59214e-296	0.524231	0.498	0.012	5.75604e-292
ST13	1.05187e-295	0.90829	0.886	0.223	1.68552e-291
STRAP	1.25569e-295	0.629846	0.65	0.059	2.01211e-291
NDUFA2	3.02847e-295	0.796973	0.815	0.157	4.85283e-291
MT-ND5	3.82363e-295	1.07436	0.974	0.455	6.12698e-291
MT-ATP6	5.68512e-295	0.982892	0.998	0.818	9.10983e-291
PSMB9	7.10924e-295	0.976473	0.937	0.311	1.13918e-290
DESI1	1.83232e-294	0.58232	0.577	0.034	2.93611e-290
KIAA0101	1.83902e-294	0.688198	0.512	0.017	2.94685e-290
ARF6	1.99322e-294	0.704055	0.757	0.11	3.19394e-290
LINC00116	2.8766e-294	0.770711	0.742	0.107	4.60946e-290
MTHFD2	3.10114e-294	0.67805	0.712	0.085	4.96927e-290
MT-CO3	4.06985e-294	0.899169	1	0.974	6.52154e-290
GPX1	5.31812e-294	0.849977	0.84	0.173	8.52175e-290
ATPIF1	7.76988e-294	0.895055	0.863	0.207	1.24505e-289
CALM1	8.66321e-294	0.965508	0.96	0.38	1.38819e-289
RPF2	1.05099e-293	0.656916	0.631	0.054	1.68411e-289
PARP1	3.62077e-293	0.744452	0.732	0.1	5.80193e-289
RBM39	6.03034e-293	0.875808	0.906	0.253	9.66301e-289
RARS	2.32207e-292	0.648423	0.64	0.057	3.72089e-288
PEBP1	2.87695e-292	0.850307	0.856	0.195	4.61002e-288
NDFIP2	3.58053e-292	0.529687	0.54	0.024	5.73745e-288
POLE3	7.13847e-292	0.669652	0.668	0.068	1.14387e-287
SNHG15	9.29081e-292	0.646864	0.638	0.056	1.48876e-287
ILF3	1.03964e-291	0.725359	0.74	0.103	1.66593e-287
PIM3	1.10988e-291	0.770647	0.646	0.061	1.77848e-287
UBE2M	1.70156e-291	0.574204	0.539	0.024	2.72658e-287
DNAJC8	1.46008e-290	0.730589	0.807	0.144	2.33963e-286
NFKBIA	1.58166e-290	1.00089	0.82	0.171	2.53446e-286
STMN1	3.25083e-290	0.932151	0.744	0.113	5.20914e-286
HELLS	2.18108e-289	0.53466	0.474	0.009	3.49497e-285
WARS	3.68317e-289	0.803263	0.836	0.175	5.90192e-285
MT-ND2	1.04193e-288	0.99592	1	0.767	1.66959e-284
PSMG1	1.04511e-288	0.583755	0.562	0.032	1.67468e-284
CD27	1.50682e-288	0.935177	0.83	0.179	2.41453e-284
PSMD11	2.6131e-288	0.656266	0.655	0.064	4.18724e-284
ANP32A	2.69201e-288	0.758397	0.747	0.113	4.31368e-284
EIF4G2	2.8235e-288	0.711764	0.717	0.094	4.52438e-284
PPAN	8.99474e-288	0.563947	0.549	0.028	1.44132e-283
RER1	1.08841e-287	0.64939	0.686	0.079	1.74408e-283
SDHB	1.17379e-287	0.695877	0.681	0.078	1.88088e-283
CISD3	2.32638e-287	0.671668	0.653	0.065	3.72778e-283
PRDX4	3.93596e-287	0.663385	0.621	0.053	6.30698e-283
RHOA	6.82181e-287	0.776279	0.866	0.198	1.09313e-282
PSMD6	7.12468e-287	0.668756	0.694	0.083	1.14166e-282
LINC00152	9.0221e-287	0.657312	0.559	0.033	1.4457e-282
DDX46	1.04482e-286	0.754878	0.777	0.13	1.67423e-282
ANP32E	1.12255e-286	0.685205	0.673	0.074	1.79877e-282
TIMM8A	1.2835e-286	0.485647	0.517	0.02	2.05668e-282
CCDC58	1.33337e-286	0.581337	0.562	0.033	2.13659e-282
EIF3A	1.42529e-286	0.73303	0.714	0.095	2.28388e-282
CLPP	1.71385e-286	0.640576	0.65	0.064	2.74628e-282
SRA1	1.82763e-286	0.5852	0.602	0.045	2.92859e-282
CBWD1	1.99512e-286	0.585575	0.567	0.034	3.19699e-282
DNAJB11	3.12935e-286	0.638565	0.676	0.074	5.01447e-282
WDR74	3.38939e-286	0.663688	0.681	0.078	5.43116e-282
PRDX2	3.51596e-286	0.899302	0.846	0.203	5.63398e-282
BRK1	9.63367e-286	0.804339	0.858	0.201	1.5437e-281
SPCS2	1.48967e-285	0.713509	0.792	0.142	2.38705e-281
ADSL	2.43087e-285	0.630024	0.651	0.065	3.89522e-281
TRAPPC4	4.67018e-285	0.693431	0.673	0.076	7.4835e-281
SS18L2	7.22678e-285	0.714971	0.754	0.117	1.15802e-280
CDC37	1.13671e-284	0.717819	0.739	0.108	1.82146e-280
NDUFB4	1.3811e-284	0.814806	0.864	0.212	2.21307e-280
SRGN	1.48311e-284	0.795851	0.818	0.168	2.37654e-280
PAICS	1.9873e-284	0.632083	0.645	0.063	3.18445e-280
POLD2	2.53252e-284	0.604643	0.61	0.05	4.05811e-280
MRPL54	3.82207e-284	0.679451	0.712	0.094	6.12449e-280
COX4I1	5.0267e-284	0.913116	1	0.783	8.05479e-280
KTN1	5.26602e-284	0.798241	0.848	0.192	8.43827e-280
EXOSC3	5.57122e-284	0.594719	0.569	0.036	8.92732e-280
ACP1	5.57172e-284	0.751808	0.744	0.115	8.92813e-280
DNAJC9	8.75086e-284	0.593598	0.57	0.036	1.40224e-279
SMIM4	1.61555e-283	0.616937	0.628	0.056	2.58876e-279
ATP5O	3.91007e-283	0.857923	0.911	0.289	6.26549e-279
DCAF13	2.88974e-282	0.568769	0.564	0.035	4.63051e-278
CENPW	4.85779e-282	0.479912	0.463	0.009	7.78413e-278
PPDPF	5.22278e-282	0.902799	0.962	0.399	8.36897e-278
APEX1	1.16547e-281	0.753854	0.769	0.13	1.86754e-277
LRRFIP1	1.84602e-281	0.74	0.775	0.134	2.95807e-277
GHITM	3.12556e-281	0.718658	0.78	0.135	5.00839e-277
WBSCR22	3.48475e-281	0.669366	0.702	0.091	5.58396e-277
SSNA1	4.30718e-281	0.68839	0.714	0.097	6.90182e-277
MRPL27	4.7061e-281	0.61888	0.648	0.066	7.54105e-277
TMEM167A	6.32484e-281	0.567105	0.597	0.046	1.01349e-276
EDF1	6.37323e-281	0.885936	0.944	0.353	1.02125e-276
SELK	7.24547e-281	0.755008	0.802	0.159	1.16101e-276
RWDD1	1.13566e-280	0.731011	0.787	0.142	1.81978e-276
PSMA6	1.71292e-280	0.619183	0.673	0.075	2.74478e-276
C19orf43	1.88988e-280	0.833917	0.873	0.234	3.02834e-276
SLC25A39	2.27957e-280	0.625905	0.613	0.053	3.65278e-276
RPL7L1	2.6531e-280	0.73402	0.686	0.086	4.25132e-276
RNPS1	3.43286e-280	0.731271	0.762	0.127	5.50081e-276
PUF60	4.64214e-280	0.653718	0.694	0.087	7.43856e-276
TOP1	1.03188e-279	0.625848	0.621	0.057	1.65348e-275
ATP5EP2	1.90086e-279	0.743713	0.843	0.189	3.04594e-275
APOA1BP	1.97674e-279	0.606077	0.617	0.054	3.16753e-275
SMS	3.85486e-279	0.579625	0.554	0.033	6.17703e-275
NUDT5	1.20782e-278	0.618257	0.631	0.06	1.93542e-274
HNRNPR	1.40854e-278	0.670739	0.698	0.091	2.25704e-274
PSMD12	1.63131e-278	0.63606	0.63	0.06	2.614e-274
RPS17	1.87794e-278	0.889774	0.871	0.242	3.00921e-274
TIMM44	1.92617e-278	0.630846	0.603	0.051	3.0865e-274
NCBP2	4.92195e-278	0.674211	0.684	0.084	7.88693e-274
MITD1	2.28855e-277	0.677759	0.696	0.09	3.66717e-273
TXN2	3.3931e-277	0.676633	0.698	0.093	5.43711e-273
ARPC1B	4.42784e-277	0.853047	0.868	0.228	7.09517e-273
MAD2L1	9.94268e-277	0.546465	0.496	0.018	1.59321e-272
GPX4	1.08551e-276	0.89661	0.907	0.295	1.73942e-272
SPCS3	1.7958e-276	0.604485	0.613	0.055	2.87759e-272
GNG8	5.02183e-276	0.691331	0.46	0.01	8.04699e-272
TXNL1	7.55715e-276	0.632706	0.66	0.073	1.21096e-271
PPIH	1.45699e-275	0.56056	0.577	0.042	2.33469e-271
DRAP1	3.89125e-275	0.823642	0.881	0.246	6.23534e-271
PDCD2	4.31424e-275	0.68191	0.669	0.079	6.91314e-271
VAPA	5.32577e-275	0.664324	0.706	0.096	8.53402e-271
EEF1D	6.27077e-275	0.85892	0.993	0.727	1.00483e-270
SERP1	1.52631e-274	0.85531	0.879	0.25	2.44576e-270
ABCE1	3.8127e-274	0.592011	0.618	0.058	6.10947e-270
SRP72	5.2246e-274	0.655829	0.674	0.081	8.3719e-270
KPNA2	8.00119e-274	0.525914	0.526	0.027	1.28211e-269
ARF1	1.20975e-273	0.769837	0.793	0.153	1.9385e-269
IFRD2	1.27332e-273	0.567461	0.555	0.036	2.04037e-269
PSMD4	2.75449e-273	0.749684	0.76	0.137	4.41379e-269
TRMT10C	5.34057e-273	0.641018	0.636	0.066	8.55772e-269
DDX24	6.54373e-273	0.880695	0.876	0.256	1.04857e-268
THOC7	1.2846e-272	0.657708	0.688	0.089	2.05844e-268
PMF1	2.28383e-272	0.664405	0.65	0.073	3.6596e-268
EIF4E	4.58119e-272	0.603218	0.61	0.056	7.3409e-268
LTA	1.1759e-271	1.25151	0.792	0.171	1.88426e-267
ATP5G2	2.20436e-271	0.907388	0.972	0.516	3.53226e-267
NDUFAF2	4.74686e-271	0.622775	0.633	0.065	7.60637e-267
ITGB1BP1	6.04926e-271	0.622392	0.605	0.056	9.69333e-267
MRPL34	1.07734e-270	0.654826	0.663	0.079	1.72633e-266
ATP5A1	2.19107e-270	0.809935	0.846	0.213	3.51097e-266
AK2	3.76296e-270	0.644053	0.612	0.058	6.02977e-266
RAD23A	4.09824e-270	0.739916	0.724	0.114	6.56702e-266
MRPL28	6.52237e-270	0.576593	0.623	0.061	1.04515e-265
TMEM70	2.20685e-269	0.591084	0.597	0.052	3.53625e-265
PSMD2	3.27947e-269	0.637809	0.628	0.064	5.25502e-265
RP11-345J4.5	1.14954e-268	0.552598	0.559	0.039	1.84202e-264
PCBP2	1.31324e-268	0.821508	0.906	0.278	2.10433e-264
TCEA1	2.52893e-268	0.68021	0.702	0.101	4.05236e-264
PET100	3.6538e-268	0.796425	0.886	0.267	5.85485e-264
PLP2	3.7512e-268	0.605714	0.625	0.064	6.01092e-264
NXT1	5.26962e-268	0.591981	0.626	0.063	8.44404e-264
BAZ1A	6.46221e-268	0.719859	0.729	0.115	1.03551e-263
COTL1	6.70794e-267	0.738947	0.737	0.123	1.07488e-262
PRKDC	7.63236e-267	0.677969	0.658	0.079	1.22301e-262
MRPL19	9.85085e-267	0.554307	0.557	0.039	1.5785e-262
CMC2	1.226e-266	0.565806	0.579	0.046	1.96455e-262
SNF8	1.4985e-266	0.640172	0.645	0.073	2.4012e-262
TMEM14B	2.415e-266	0.663372	0.731	0.12	3.86979e-262
CHMP2A	6.76245e-266	0.655473	0.702	0.101	1.08361e-261
MCM3	6.94365e-266	0.560212	0.552	0.038	1.11265e-261
BAX	7.15612e-266	0.75593	0.77	0.147	1.1467e-261
RNF145	2.21186e-265	0.653499	0.664	0.083	3.54429e-261
PTPN6	2.78753e-265	0.639408	0.656	0.078	4.46674e-261
CKLF	3.19664e-265	0.642924	0.683	0.092	5.12229e-261
USP1	3.39982e-265	0.567556	0.572	0.045	5.44787e-261
CYBA	4.16881e-265	0.882464	0.97	0.506	6.6801e-261
SEC11C	5.31357e-265	0.635048	0.693	0.096	8.51447e-261
MYL12B	1.28366e-264	0.828608	0.927	0.347	2.05693e-260
SMC2	1.96855e-264	0.519212	0.483	0.019	3.1544e-260
G3BP1	3.27687e-264	0.623149	0.669	0.085	5.25086e-260
AC010642.1	6.40613e-264	0.554624	0.567	0.044	1.02652e-259
DSTN	8.38358e-264	0.667325	0.683	0.093	1.34338e-259
KRT10	9.47007e-264	0.74123	0.841	0.206	1.51748e-259
ALYREF	1.42249e-263	0.51798	0.506	0.026	2.27939e-259
RAC2	1.67677e-263	0.789969	0.858	0.229	2.68686e-259
IMP3	2.08924e-263	0.708831	0.729	0.123	3.3478e-259
BUB3	2.17268e-263	0.643577	0.673	0.088	3.4815e-259
RSL24D1	3.63129e-263	0.769791	0.808	0.178	5.81878e-259
GPN3	1.62587e-262	0.498948	0.514	0.028	2.6053e-258
RPIA	1.64873e-262	0.545079	0.57	0.045	2.64193e-258
ZWINT	1.87944e-262	0.488493	0.455	0.013	3.01162e-258
TDG	7.99802e-262	0.59711	0.577	0.049	1.2816e-257
IRF8	1.14812e-261	0.694237	0.555	0.042	1.83975e-257
UBE2L6	3.41402e-261	0.739022	0.757	0.137	5.47062e-257
CCDC167	1.50834e-260	0.581004	0.587	0.053	2.41696e-256
BCL2A1	1.7721e-260	0.583335	0.567	0.046	2.83961e-256
HSPB11	2.56821e-260	0.622827	0.613	0.064	4.11529e-256
SRP9	3.00198e-260	0.711404	0.77	0.149	4.81037e-256
BZW2	2.73373e-259	0.576377	0.57	0.048	4.38054e-255
TYMP	2.80938e-259	0.741474	0.736	0.128	4.50176e-255
S100A6	5.41123e-259	0.883265	0.939	0.408	8.67095e-255
RNF181	1.39865e-258	0.666732	0.717	0.116	2.2412e-254
ESF1	1.4614e-258	0.637662	0.661	0.086	2.34175e-254
SAR1A	1.58244e-258	0.610811	0.66	0.084	2.5357e-254
TFDP1	1.7411e-258	0.527635	0.509	0.028	2.78994e-254
UXT	2.20491e-258	0.820703	0.898	0.299	3.53314e-254
AP2S1	2.45605e-258	0.661876	0.731	0.125	3.93557e-254
PRDX5	4.04378e-258	0.698621	0.798	0.171	6.47975e-254
PCBP1	4.20065e-258	0.820627	0.899	0.293	6.73112e-254
NDUFB1	9.20228e-258	0.805241	0.891	0.287	1.47457e-253
VDAC3	1.32219e-257	0.61183	0.636	0.074	2.11867e-253
LSM1	1.98986e-257	0.611494	0.636	0.075	3.18855e-253
CCDC59	2.66862e-257	0.663405	0.673	0.093	4.27619e-253
HIST1H4C	5.42623e-257	1.12692	0.807	0.2	8.69499e-253
RAB7A	6.81748e-257	0.652083	0.689	0.101	1.09243e-252
THRAP3	1.1805e-256	0.694936	0.744	0.135	1.89163e-252
SNRNP40	2.58618e-256	0.561969	0.597	0.058	4.14409e-252
UCHL3	2.7217e-256	0.558825	0.557	0.044	4.36125e-252
ISOC2	5.771e-256	0.520126	0.534	0.037	9.24745e-252
C9orf16	6.05276e-256	0.752315	0.815	0.196	9.69894e-252
HSPB1	6.71459e-256	0.706321	0.679	0.098	1.07595e-251
COPE	9.63806e-256	0.71494	0.82	0.199	1.5444e-251
SRRM2	1.18564e-255	0.820352	0.869	0.263	1.89987e-251
VRK1	1.37584e-255	0.529505	0.527	0.035	2.20465e-251
CHCHD7	1.97867e-255	0.58332	0.607	0.063	3.17062e-251
TRA2B	2.60872e-255	0.752551	0.841	0.219	4.18021e-251
FARSA	3.0309e-255	0.606124	0.621	0.07	4.85672e-251
ETFA	4.58471e-255	0.544273	0.598	0.059	7.34654e-251
TPRKB	7.68247e-255	0.645456	0.636	0.079	1.23104e-250
OSTC	1.24245e-254	0.65872	0.714	0.12	1.9909e-250
TRAP1	1.38299e-254	0.562016	0.549	0.043	2.2161e-250
TMED9	2.5704e-254	0.644425	0.717	0.119	4.11881e-250
SF3B2	3.83914e-254	0.713078	0.702	0.114	6.15184e-250
PSMC2	3.85309e-254	0.557315	0.62	0.068	6.1742e-250
PFDN5	4.17899e-254	0.701698	0.997	0.849	6.69641e-250
ATP6V1F	4.20409e-254	0.713495	0.774	0.158	6.73664e-250
PRR13	5.2917e-254	0.708968	0.797	0.176	8.47942e-250
TMSB4X	6.29698e-254	0.632692	1	1	1.00903e-249
PTPN7	6.46649e-254	0.52585	0.565	0.048	1.03619e-249
RPF1	1.80118e-253	0.611009	0.635	0.076	2.88622e-249
HNRNPA0	2.64306e-253	0.705923	0.764	0.151	4.23523e-249
ETF1	2.89601e-253	0.526943	0.509	0.031	4.64056e-249
SLC43A3	2.98245e-253	0.49973	0.484	0.023	4.77907e-249
TMCO1	3.05947e-253	0.629152	0.679	0.098	4.9025e-249
SELT	3.2599e-253	0.572215	0.663	0.087	5.22367e-249
RBM25	6.76864e-253	0.71334	0.792	0.169	1.08461e-248
RRP1	6.82007e-253	0.510946	0.506	0.03	1.09285e-248
TIMM50	1.11661e-252	0.534053	0.552	0.044	1.78926e-248
TOMM20	5.86173e-252	0.645916	0.709	0.114	9.39284e-248
CREM	6.67714e-252	0.538768	0.55	0.044	1.06995e-247
EIF3G	7.14085e-252	0.783832	0.846	0.233	1.14425e-247
DPM2	1.17244e-251	0.508345	0.521	0.034	1.87872e-247
MPHOSPH6	1.40622e-251	0.489141	0.511	0.031	2.25333e-247
P4HB	1.44493e-251	0.58012	0.626	0.074	2.31536e-247
TOMM7	1.82176e-251	0.826849	0.983	0.625	2.91918e-247
MRPL24	3.44047e-251	0.531695	0.572	0.051	5.51301e-247
VPS29	5.16885e-251	0.655748	0.707	0.115	8.28256e-247
TSR3	5.5628e-251	0.569475	0.582	0.056	8.91383e-247
MTX1	7.17285e-251	0.506707	0.537	0.04	1.14938e-246
CAMTA1	9.93408e-251	0.59448	0.62	0.072	1.59184e-246
KARS	1.15931e-250	0.611941	0.66	0.089	1.85768e-246
NAA38	1.2293e-250	0.668224	0.716	0.12	1.96984e-246
DDX5	1.76459e-250	0.802587	0.967	0.482	2.82758e-246
CD47	1.78111e-250	0.66911	0.719	0.124	2.85404e-246
DPM1	3.04529e-250	0.557816	0.605	0.064	4.87978e-246
ZNRD1	3.39281e-250	0.552085	0.608	0.066	5.43665e-246
CLSPN	4.2606e-250	0.47136	0.418	0.009	6.82719e-246
TNFAIP8	8.82936e-250	0.644699	0.646	0.086	1.41482e-245
CLTB	1.11365e-249	0.551733	0.59	0.059	1.78452e-245
TKT	1.85586e-249	0.61046	0.628	0.077	2.97383e-245
NAA50	2.11265e-249	0.50697	0.502	0.03	3.38531e-245
SLMO2	2.52992e-249	0.554998	0.593	0.06	4.05394e-245
YWHAZ	4.40159e-249	0.783167	0.869	0.267	7.0531e-245
CBX6	4.65209e-249	0.616386	0.579	0.057	7.45452e-245
MCM5	5.51665e-249	0.547413	0.527	0.038	8.83988e-245
TMEM160	8.47083e-249	0.647607	0.702	0.116	1.35737e-244
CHCHD3	1.48405e-248	0.482201	0.471	0.022	2.37804e-244
HLA-E	1.6496e-248	0.831472	0.979	0.625	2.64332e-244
TRAPPC1	1.69298e-248	0.672101	0.764	0.155	2.71284e-244
EED	2.39696e-248	0.553984	0.498	0.029	3.84089e-244
SRP19	4.18309e-248	0.578009	0.605	0.068	6.70298e-244
TGFB1	4.39204e-248	0.546742	0.559	0.049	7.03781e-244
PABPC1	2.22359e-247	0.829022	0.982	0.645	3.56308e-243
PGP	3.03985e-247	0.53449	0.527	0.039	4.87105e-243
SUMO1	4.841e-247	0.621288	0.702	0.115	7.75721e-243
MDH1	8.24525e-247	0.609984	0.678	0.101	1.32122e-242
IFI16	1.79665e-246	0.670077	0.764	0.153	2.87895e-242
BCCIP	1.98791e-246	0.587497	0.64	0.082	3.18543e-242
NELFE	6.34803e-246	0.51935	0.559	0.049	1.01721e-241
UBE2V2	7.9277e-246	0.541474	0.552	0.048	1.27034e-241
RNF126	8.1335e-246	0.566231	0.564	0.052	1.30331e-241
SYNGR2	1.10165e-244	0.64269	0.698	0.114	1.76528e-240
PFDN4	1.43216e-244	0.604627	0.661	0.095	2.2949e-240
MZT2A	1.58058e-244	0.679765	0.724	0.132	2.53273e-240
SMC3	1.74519e-244	0.58153	0.626	0.078	2.79649e-240
RUVBL1	2.31614e-244	0.573904	0.532	0.042	3.71139e-240
SUPT4H1	3.1665e-244	0.664262	0.681	0.109	5.07399e-240
MPHOSPH10	4.61853e-244	0.532135	0.592	0.062	7.40073e-240
CD82	6.84708e-244	0.532543	0.519	0.038	1.09718e-239
KDELR2	9.97745e-244	0.52213	0.572	0.056	1.59879e-239
HSPA4	1.32938e-243	0.494438	0.499	0.031	2.1302e-239
PTP4A2	3.01261e-243	0.688188	0.749	0.15	4.82741e-239
PRPF40A	7.30103e-243	0.610465	0.631	0.081	1.16992e-238
NDUFC1	9.9252e-243	0.717645	0.769	0.166	1.59041e-238
LAP3	1.1785e-242	0.573319	0.612	0.072	1.88843e-238
SNRNP70	2.0311e-242	0.569742	0.579	0.059	3.25464e-238
EMC4	2.52797e-242	0.58108	0.625	0.079	4.05082e-238
FRG1	3.42516e-242	0.635522	0.711	0.122	5.48847e-238
DHX15	5.7289e-242	0.515989	0.522	0.039	9.17999e-238
PDCD6	9.80043e-242	0.61783	0.693	0.114	1.57042e-237
ARHGDIA	1.57344e-241	0.655424	0.712	0.127	2.52128e-237
FDPS	5.51352e-241	0.616059	0.638	0.088	8.83486e-237
SLC38A5	6.96675e-241	0.501803	0.488	0.029	1.11635e-236
GRWD1	7.2756e-241	0.503617	0.501	0.033	1.16584e-236
PRRC2C	8.34826e-241	0.738992	0.808	0.203	1.33773e-236
NUCKS1	1.14721e-240	0.698741	0.793	0.185	1.83828e-236
SDHC	1.55892e-240	0.573192	0.645	0.089	2.49801e-236
RRP1B	3.42997e-240	0.511613	0.527	0.042	5.49619e-236
PSMD9	3.9022e-240	0.525707	0.542	0.047	6.25288e-236
USP16	1.60559e-239	0.567242	0.623	0.079	2.5728e-235
SURF6	5.60589e-239	0.519111	0.557	0.052	8.98288e-235
COPS3	6.16736e-239	0.477648	0.527	0.042	9.88258e-235
MRPL37	7.58405e-239	0.528488	0.524	0.042	1.21527e-234
MCTS1	7.66607e-239	0.534691	0.544	0.049	1.22841e-234
AMD1	1.09359e-238	0.534143	0.554	0.051	1.75237e-234
PCMT1	1.13216e-238	0.509832	0.569	0.057	1.81417e-234
RSRC2	3.20308e-238	0.641286	0.721	0.133	5.13262e-234
CAPZA1	3.32148e-238	0.562307	0.613	0.075	5.32234e-234
CHCHD1	3.63105e-238	0.493029	0.516	0.039	5.81839e-234
RPA2	4.72938e-238	0.583422	0.635	0.086	7.57836e-234
TRIAP1	5.59594e-238	0.513406	0.527	0.043	8.96693e-234
ACTR3	7.00774e-238	0.621435	0.679	0.109	1.12292e-233
NDUFV1	8.37585e-238	0.590718	0.631	0.085	1.34215e-233
NOP14	1.87151e-237	0.480979	0.493	0.032	2.9989e-233
CWC15	8.32325e-237	0.614015	0.671	0.105	1.33372e-232
TNFRSF9	1.01456e-236	0.535912	0.453	0.022	1.62573e-232
ITGAE	1.86221e-236	0.563991	0.575	0.061	2.984e-232
TIPIN	2.27294e-236	0.491579	0.493	0.032	3.64216e-232
C9orf78	3.14697e-236	0.633406	0.712	0.13	5.04271e-232
LAMTOR2	3.92054e-236	0.567832	0.63	0.085	6.28228e-232
MT-ND4L	4.22815e-236	0.820726	0.939	0.438	6.77518e-232
CYB5A	4.64755e-236	0.515483	0.577	0.061	7.44723e-232
DENR	5.31083e-236	0.593028	0.59	0.068	8.51008e-232
2020-09-07	7.50941e-236	0.701148	0.785	0.194	1.20331e-231
DPY30	9.79437e-236	0.583422	0.681	0.11	1.56945e-231
CCDC137	2.43671e-235	0.528346	0.504	0.037	3.90459e-231
SLC3A2	3.41547e-235	0.589096	0.595	0.071	5.47295e-231
GDI2	6.90551e-235	0.592589	0.645	0.094	1.10654e-230
IRF1	8.4018e-235	0.739265	0.744	0.157	1.3463e-230
FEN1	8.63551e-235	0.45954	0.438	0.018	1.38375e-230
HIGD1A	1.78764e-234	0.52171	0.524	0.044	2.86451e-230
CDC42	1.91119e-234	0.749023	0.825	0.233	3.06248e-230
UBC	2.61968e-234	0.755045	0.899	0.329	4.19777e-230
BTG3	5.39184e-234	0.456783	0.43	0.016	8.63988e-230
LLPH	8.50076e-234	0.504053	0.55	0.053	1.36216e-229
C20orf27	1.08408e-233	0.50274	0.507	0.038	1.73713e-229
BAG1	1.20231e-233	0.543385	0.55	0.053	1.92659e-229
AP2B1	1.71616e-233	0.625551	0.681	0.116	2.74998e-229
RFC3	2.40525e-233	0.418084	0.405	0.011	3.85417e-229
NAMPT	7.25523e-233	0.507123	0.501	0.037	1.16258e-228
MRPS6	1.42605e-232	0.594562	0.655	0.099	2.2851e-228
PBDC1	1.48355e-232	0.504659	0.54	0.05	2.37724e-228
UQCRB	3.51418e-232	0.76685	0.985	0.67	5.63113e-228
PSME3	3.96469e-232	0.524866	0.57	0.061	6.35302e-228
AUP1	4.59261e-232	0.56315	0.575	0.064	7.35919e-228
DNAJC15	4.64887e-232	0.530317	0.569	0.06	7.44935e-228
SVIP	2.0745e-231	0.780173	0.81	0.226	3.32417e-227
PABPN1	2.77913e-231	0.520918	0.572	0.062	4.45328e-227
WDR83OS	3.42271e-231	0.640634	0.752	0.164	5.48456e-227
LAG3	6.21005e-231	0.549454	0.514	0.042	9.95099e-227
BSG	6.25716e-231	0.603238	0.655	0.102	1.00265e-226
COA4	6.33062e-231	0.52917	0.555	0.057	1.01442e-226
EZR	8.32536e-231	0.588668	0.645	0.096	1.33406e-226
MALSU1	1.45973e-230	0.522761	0.536	0.049	2.33906e-226
MEA1	1.54716e-230	0.520621	0.557	0.057	2.47916e-226
UBE2D2	2.3194e-230	0.688507	0.767	0.178	3.7166e-226
EEF1G	5.36266e-230	0.770565	0.874	0.319	8.59313e-226
SRSF4	6.57667e-230	0.48394	0.547	0.053	1.05385e-225
AIMP2	8.28947e-230	0.485974	0.464	0.027	1.3283e-225
VAMP8	9.23936e-230	0.660378	0.77	0.18	1.48051e-225
C11orf73	1.01995e-229	0.53531	0.579	0.066	1.63436e-225
RRS1	3.53938e-229	0.460806	0.481	0.032	5.6715e-225
TFRC	3.97506e-229	0.535009	0.536	0.05	6.36963e-225
U2SURP	5.93232e-229	0.624191	0.681	0.118	9.50595e-225
IFI27L2	6.20309e-228	0.503672	0.588	0.069	9.93983e-224
MLEC	7.46064e-228	0.522336	0.542	0.053	1.19549e-223
ESD	8.8253e-228	0.543447	0.58	0.067	1.41417e-223
RABGGTB	1.04178e-227	0.468898	0.466	0.028	1.66935e-223
MRPS36	1.60085e-227	0.572938	0.621	0.087	2.5652e-223
RFC4	3.26173e-227	0.441941	0.433	0.02	5.22659e-223
UFD1L	6.48072e-227	0.533917	0.564	0.063	1.03847e-222
ARPC4	8.41656e-227	0.559664	0.598	0.077	1.34867e-222
PPP4C	2.91914e-226	0.595149	0.65	0.101	4.67763e-222
HPRT1	1.75301e-225	0.50962	0.506	0.042	2.80902e-221
PYCR1	2.06393e-225	0.424679	0.433	0.02	3.30724e-221
EPRS	2.78698e-225	0.528486	0.536	0.053	4.46585e-221
CHEK1	4.00589e-225	0.362062	0.372	0.006	6.41904e-221
WDR46	4.38988e-225	0.444122	0.479	0.033	7.03435e-221
ATP5H	1.12077e-224	0.657994	0.787	0.2	1.79592e-220
UCHL5	1.44349e-224	0.455909	0.478	0.033	2.31306e-220
MRPL50	1.59148e-224	0.510979	0.519	0.047	2.55019e-220
EIF3F	5.71906e-224	0.751695	0.846	0.278	9.16422e-220
H2AFV	1.29567e-223	0.628389	0.689	0.129	2.07618e-219
SRSF11	1.3858e-223	0.660749	0.727	0.154	2.22061e-219
SFT2D1	1.57793e-223	0.535576	0.562	0.063	2.52847e-219
NFKBIB	2.69129e-223	0.449812	0.456	0.027	4.31252e-219
MPDU1	2.87155e-223	0.436834	0.456	0.027	4.60136e-219
VIMP	3.06498e-223	0.523944	0.582	0.071	4.91132e-219
UQCRC1	3.92093e-223	0.554294	0.598	0.079	6.2829e-219
ATIC	4.40198e-223	0.492329	0.537	0.053	7.05373e-219
LSM10	4.58441e-223	0.506618	0.549	0.058	7.34606e-219
DDX27	4.61165e-223	0.564588	0.565	0.065	7.38971e-219
PTBP1	5.10848e-223	0.526975	0.569	0.066	8.18583e-219
GARS	1.16486e-222	0.466065	0.507	0.043	1.86658e-218
GLRX5	1.91294e-222	0.525983	0.575	0.069	3.0653e-218
CANX	2.23776e-222	0.556802	0.555	0.062	3.58579e-218
NPW	2.60899e-222	0.58816	0.37	0.007	4.18065e-218
ENSA	5.53486e-222	0.609049	0.671	0.12	8.86906e-218
MRPL16	8.43211e-222	0.544814	0.565	0.066	1.35116e-217
FUBP1	1.06862e-221	0.4885	0.499	0.041	1.71235e-217
ZNF511	1.83397e-221	0.456205	0.481	0.035	2.93875e-217
FERMT3	2.04215e-221	0.488223	0.484	0.037	3.27233e-217
VBP1	2.34973e-221	0.533533	0.529	0.052	3.76521e-217
FIS1	2.37369e-221	0.595933	0.707	0.137	3.80361e-217
TUBA4A	2.96965e-221	0.542965	0.575	0.07	4.75856e-217
SNHG8	4.08996e-221	0.781521	0.871	0.324	6.55376e-217
RUVBL2	6.43064e-221	0.509527	0.524	0.05	1.03045e-216
RAD51C	6.86564e-221	0.467262	0.474	0.034	1.10015e-216
UBE2C	8.79975e-221	0.413346	0.365	0.006	1.41007e-216
PSMC6	9.82065e-221	0.527613	0.534	0.055	1.57366e-216
TGS1	1.17857e-220	0.504046	0.542	0.057	1.88854e-216
NONO	2.21982e-220	0.596178	0.638	0.101	3.55703e-216
DDIT4	2.32243e-220	0.583462	0.516	0.049	3.72146e-216
CITE-CD27-GCACTCCTGCATGTA	4.25232e-220	0.664212	1	1	6.81391e-216
MORF4L1	5.53075e-220	0.708341	0.838	0.267	8.86248e-216
FUOM	7.65318e-220	0.46819	0.471	0.034	1.22635e-215
ELAVL1	8.80007e-220	0.497328	0.519	0.049	1.41012e-215
TWISTNB	1.37867e-219	0.513269	0.514	0.048	2.20918e-215
MRPS28	1.41183e-219	0.436745	0.494	0.04	2.26231e-215
SH2D2A	1.71913e-219	0.487642	0.509	0.046	2.75473e-215
MRPS33	1.78445e-219	0.572438	0.638	0.1	2.85941e-215
EIF4EBP1	1.84164e-219	0.459666	0.43	0.022	2.95104e-215
TSR1	2.12041e-219	0.466144	0.464	0.031	3.39775e-215
AIF1	2.85792e-219	0.711184	0.716	0.152	4.57954e-215
GNL2	3.76992e-219	0.434746	0.453	0.028	6.04092e-215
TEX30	4.69256e-219	0.425709	0.421	0.02	7.51936e-215
EXOSC7	6.93199e-219	0.483261	0.517	0.048	1.11078e-214
AKR1A1	2.01822e-218	0.510253	0.545	0.059	3.234e-214
ARL5A	6.32125e-218	0.506486	0.55	0.061	1.01292e-213
FAM173A	6.37999e-218	0.547213	0.527	0.053	1.02233e-213
CLNS1A	8.0048e-218	0.578747	0.658	0.113	1.28269e-213
NT5C	8.64714e-218	0.527962	0.554	0.064	1.38562e-213
ISG20	5.25576e-217	0.889365	0.828	0.283	8.42184e-213
LAMTOR1	5.37194e-217	0.591933	0.653	0.112	8.608e-213
GNPDA1	8.63592e-217	0.486449	0.476	0.036	1.38382e-212
ZBED2	8.8605e-217	0.655198	0.514	0.051	1.41981e-212
MRPL9	1.03658e-216	0.541055	0.565	0.069	1.66102e-212
DAZAP1	1.38053e-216	0.488362	0.504	0.045	2.21216e-212
RTF1	1.45947e-216	0.618374	0.704	0.141	2.33866e-212
SUMO3	1.52645e-216	0.540685	0.593	0.081	2.44598e-212
DCXR	1.6082e-216	0.555452	0.575	0.073	2.57698e-212
MIEN1	2.27368e-216	0.486975	0.544	0.06	3.64335e-212
PARL	2.81237e-216	0.473321	0.509	0.047	4.50654e-212
MOB1A	4.3994e-216	0.520083	0.557	0.066	7.0496e-212
SDHD	1.10777e-215	0.542681	0.585	0.079	1.77508e-211
MALAT1	3.04349e-215	0.288117	1	1	4.87689e-211
ETFB	4.09332e-215	0.579569	0.621	0.098	6.55914e-211
HNRNPH3	6.90312e-215	0.55918	0.577	0.075	1.10616e-210
EZH2	1.27625e-214	0.4001	0.37	0.009	2.04507e-210
PNN	2.14705e-214	0.599227	0.633	0.103	3.44043e-210
CD69	3.06813e-214	0.54141	0.471	0.036	4.91638e-210
KHDRBS1	3.25945e-214	0.6269	0.671	0.125	5.22294e-210
BCLAF1	6.84677e-214	0.586941	0.641	0.107	1.09713e-209
PABPC4	1.17898e-213	0.484957	0.511	0.049	1.88919e-209
FDX1	1.46723e-213	0.475641	0.512	0.05	2.35109e-209
SON	2.19086e-213	0.738412	0.922	0.444	3.51064e-209
TMBIM6	2.47791e-213	0.664891	0.765	0.194	3.9706e-209
RQCD1	6.16479e-213	0.498421	0.542	0.061	9.87846e-209
SNRPA	7.75543e-213	0.500913	0.539	0.06	1.24273e-208
MRPS10	1.22167e-212	0.494306	0.514	0.051	1.9576e-208
EIF3L	1.56609e-212	0.682527	0.782	0.217	2.50951e-208
CHMP4B	2.40087e-212	0.539763	0.59	0.083	3.84716e-208
SOCS1	2.42832e-212	0.563233	0.536	0.06	3.89114e-208
COA6	3.72079e-212	0.462821	0.493	0.043	5.9622e-208
DNTTIP2	4.41249e-212	0.545553	0.569	0.074	7.07057e-208
DDT	5.54534e-212	0.637824	0.696	0.144	8.88586e-208
C12orf45	1.37083e-211	0.402935	0.417	0.021	2.19661e-207
DNLZ	1.70646e-211	0.474927	0.493	0.044	2.73444e-207
LTV1	2.47964e-211	0.482512	0.486	0.042	3.97338e-207
NABP2	4.71216e-211	0.412285	0.402	0.017	7.55076e-207
POLR1D	7.43487e-211	0.599798	0.651	0.117	1.19136e-206
SSU72	8.66207e-211	0.660346	0.732	0.175	1.38801e-206
NDUFA8	1.35657e-210	0.507892	0.545	0.064	2.17377e-206
AFG3L2	1.49408e-210	0.461327	0.474	0.038	2.39411e-206
PRDX6	1.54807e-210	0.588367	0.666	0.124	2.48064e-206
CENPH	1.86083e-210	0.391202	0.41	0.02	2.98179e-206
ORMDL1	2.32188e-210	0.552281	0.623	0.1	3.72059e-206
UFM1	3.64199e-210	0.458646	0.502	0.048	5.83592e-206
REXO4	4.45578e-210	0.51989	0.537	0.061	7.13994e-206
MRPS5	6.12453e-210	0.525988	0.567	0.074	9.81394e-206
SLC1A5	6.56948e-210	0.408405	0.433	0.026	1.05269e-205
POLR3H	7.35324e-210	0.445155	0.435	0.027	1.17828e-205
PSMG2	1.1669e-209	0.530374	0.56	0.072	1.86984e-205
MT-ND3	1.21758e-209	0.657272	0.993	0.902	1.95106e-205
LMAN2	2.59187e-209	0.53337	0.612	0.095	4.15322e-205
TRMT6	3.17328e-209	0.401432	0.428	0.025	5.08486e-205
POP4	3.26454e-209	0.489178	0.526	0.057	5.23109e-205
NME2	8.25394e-209	0.359677	0.352	0.007	1.32261e-204
ITPA	8.3889e-209	0.491225	0.512	0.053	1.34424e-204
BMS1	1.2795e-208	0.479817	0.483	0.042	2.05027e-204
OLA1	1.7461e-208	0.468515	0.466	0.037	2.79796e-204
BYSL	1.8647e-208	0.387025	0.397	0.017	2.988e-204
ECHDC1	2.78767e-208	0.430389	0.476	0.039	4.46696e-204
DYNC1LI1	3.0944e-208	0.388726	0.398	0.017	4.95846e-204
ATAD2	5.0875e-208	0.415868	0.392	0.016	8.15221e-204
AP2M1	7.12228e-208	0.544938	0.592	0.087	1.14127e-203
RPP30	8.28397e-208	0.44223	0.474	0.039	1.32742e-203
GEMIN6	8.42181e-208	0.427575	0.431	0.027	1.34951e-203
PPIF	9.1876e-208	0.407734	0.417	0.022	1.47222e-203
C9orf142	1.23252e-207	0.58772	0.671	0.13	1.97499e-203
MESDC2	1.31191e-207	0.504493	0.562	0.073	2.1022e-203
PSMD3	1.77988e-207	0.477851	0.494	0.047	2.85207e-203
STAT1	2.92809e-207	0.681477	0.765	0.197	4.69197e-203
SMC1A	1.50661e-206	0.507044	0.517	0.056	2.41419e-202
C7orf50	1.66477e-206	0.441208	0.469	0.038	2.66762e-202
FUS	1.72935e-206	0.681569	0.764	0.205	2.77111e-202
MRPS11	2.09263e-206	0.461582	0.496	0.047	3.35323e-202
CENPN	3.23864e-206	0.36463	0.365	0.01	5.1896e-202
SNHG9	3.6953e-206	0.688937	0.731	0.175	5.92136e-202
AMICA1	4.29393e-206	0.572617	0.562	0.075	6.8806e-202
SLTM	4.63155e-206	0.525907	0.585	0.085	7.4216e-202
HSPA14	5.8191e-206	0.402202	0.41	0.021	9.32453e-202
RHEB	6.17642e-206	0.446631	0.507	0.052	9.89709e-202
MRPL46	8.54854e-206	0.424079	0.456	0.035	1.36982e-201
MRPS35	9.17957e-206	0.478278	0.514	0.055	1.47093e-201
SMARCA5	1.00018e-205	0.485213	0.517	0.056	1.60269e-201
CITE-CD28-ATTCTGTCTTTCCCA	1.03442e-205	0.580735	1	1	1.65755e-201
PPP1CC	1.29534e-205	0.492627	0.564	0.074	2.07565e-201
STUB1	1.61745e-205	0.532636	0.588	0.086	2.59181e-201
C12orf57	2.57781e-205	0.709745	0.792	0.231	4.13068e-201
MMADHC	3.14793e-205	0.513515	0.565	0.075	5.04424e-201
SMC4	3.6265e-205	0.406991	0.39	0.017	5.8111e-201
SMIM12	3.90916e-205	0.467977	0.504	0.051	6.26403e-201
PPA2	8.48933e-205	0.468388	0.529	0.06	1.36033e-200
PDCL3	9.40582e-205	0.491013	0.531	0.061	1.50719e-200
HNRNPH1	1.70494e-204	0.836063	0.779	0.227	2.732e-200
PIN1	2.63746e-204	0.538176	0.554	0.072	4.22627e-200
TYW3	6.02292e-204	0.427846	0.428	0.027	9.65113e-200
YWHAH	6.89898e-204	0.421408	0.425	0.026	1.10549e-199
TIMM9	7.45827e-204	0.490188	0.514	0.056	1.19511e-199
MYL12A	8.13484e-204	0.702827	0.934	0.514	1.30353e-199
PMAIP1	1.51999e-203	0.390507	0.379	0.014	2.43563e-199
NOB1	4.07031e-203	0.524739	0.534	0.065	6.52226e-199
TMEM126B	2.97229e-202	0.491343	0.542	0.067	4.7628e-198
LRR1	3.33369e-202	0.390576	0.383	0.016	5.34191e-198
RHOG	3.69252e-202	0.505295	0.547	0.071	5.91689e-198
SUGT1	3.9242e-202	0.442378	0.481	0.044	6.28814e-198
PPP2CA	1.5116e-201	0.497827	0.547	0.071	2.42219e-197
EBP	1.65768e-201	0.440143	0.474	0.043	2.65626e-197
ELOF1	1.80164e-201	0.423994	0.491	0.048	2.88694e-197
TCERG1	1.88674e-201	0.490528	0.542	0.068	3.02331e-197
XRN2	2.4029e-201	0.582286	0.607	0.101	3.85041e-197
ACOT7	5.03563e-201	0.403237	0.398	0.02	8.06909e-197
CHAC2	5.79427e-201	0.370177	0.364	0.012	9.28475e-197
GTF2H2	6.8503e-201	0.395523	0.375	0.015	1.09769e-196
ECHS1	7.61605e-201	0.492561	0.554	0.073	1.2204e-196
TYMS	1.00161e-200	0.444226	0.377	0.015	1.60498e-196
MRPS31	1.31794e-200	0.497903	0.55	0.072	2.11187e-196
DNAJC19	1.98271e-200	0.54589	0.615	0.104	3.17709e-196
FKBP3	2.02143e-200	0.485216	0.519	0.06	3.23913e-196
CBWD2	2.77319e-200	0.425725	0.44	0.032	4.44375e-196
UQCRC2	5.64242e-200	0.531479	0.6	0.096	9.04141e-196
ZMAT2	5.84207e-200	0.552803	0.612	0.103	9.36133e-196
RAB8A	8.65444e-200	0.44953	0.468	0.041	1.38679e-195
SF3B4	9.27146e-200	0.444582	0.488	0.048	1.48566e-195
DDX56	9.60501e-200	0.450054	0.456	0.038	1.53911e-195
DIMT1	1.01703e-199	0.426813	0.458	0.038	1.62968e-195
LYPLA1	1.91817e-199	0.484123	0.489	0.049	3.07368e-195
C1orf131	2.27209e-199	0.479403	0.542	0.069	3.64079e-195
TIMM23	2.7578e-199	0.395085	0.418	0.026	4.4191e-195
GPI	3.32896e-199	0.478825	0.545	0.07	5.33433e-195
DUSP23	3.73575e-199	0.400409	0.44	0.032	5.98617e-195
ASNA1	5.1897e-199	0.448228	0.501	0.053	8.31598e-195
COX14	6.45921e-199	0.576654	0.696	0.153	1.03502e-194
PTPMT1	1.04736e-198	0.406456	0.433	0.031	1.67828e-194
C16orf80	1.21092e-198	0.405316	0.418	0.027	1.94038e-194
MRPS25	1.24947e-198	0.482233	0.514	0.059	2.00216e-194
LSMD1	1.70792e-198	0.58681	0.621	0.111	2.73677e-194
ZFAS1	1.78542e-198	0.717473	0.869	0.361	2.86095e-194
RILPL2	2.10651e-198	0.453917	0.45	0.036	3.37546e-194
ZBTB32	2.49148e-198	0.359089	0.345	0.009	3.99235e-194
PTS	3.00318e-198	0.396372	0.405	0.023	4.81229e-194
IRF4	4.16774e-198	0.536656	0.555	0.078	6.67839e-194
EMC7	5.67262e-198	0.462071	0.494	0.052	9.08981e-194
CISH	6.58256e-198	0.429712	0.438	0.033	1.05479e-193
PPIG	6.5889e-198	0.553839	0.658	0.127	1.0558e-193
NIP7	7.86598e-198	0.43207	0.448	0.036	1.26044e-193
COX7A2L	9.48576e-198	0.552966	0.699	0.153	1.52e-193
SRPRB	3.01779e-197	0.434863	0.463	0.041	4.83571e-193
COA3	3.2647e-197	0.458736	0.499	0.054	5.23135e-193
ZNHIT1	3.79426e-197	0.530915	0.607	0.102	6.07992e-193
RNH1	3.97854e-197	0.524416	0.613	0.104	6.37521e-193
BCAP31	5.47787e-197	0.489512	0.577	0.086	8.77774e-193
ASNSD1	5.74671e-197	0.457004	0.491	0.051	9.20853e-193
PDCD10	6.19669e-197	0.477251	0.519	0.061	9.92957e-193
NUDT21	6.93092e-197	0.447581	0.464	0.042	1.11061e-192
BLOC1S1	1.31647e-196	0.541119	0.636	0.118	2.10951e-192
C21orf59	1.68039e-196	0.427336	0.45	0.037	2.69266e-192
TMEM141	2.66198e-196	0.431096	0.461	0.041	4.26556e-192
MED28	4.51538e-196	0.488136	0.559	0.079	7.23544e-192
SARS	8.13788e-196	0.502971	0.612	0.105	1.30401e-191
SURF4	9.12502e-196	0.415604	0.493	0.051	1.46219e-191
SSR3	1.0265e-195	0.474615	0.514	0.06	1.64486e-191
FIBP	1.35664e-195	0.467344	0.532	0.067	2.17388e-191
LAMTOR4	2.62169e-195	0.625945	0.777	0.231	4.201e-191
DNAJC7	3.46359e-195	0.5241	0.603	0.102	5.55006e-191
UTP18	4.24861e-195	0.442582	0.468	0.044	6.80797e-191
RPAIN	6.67493e-195	0.492958	0.514	0.061	1.06959e-190
RAD23B	6.93552e-195	0.417805	0.464	0.042	1.11135e-190
KRR1	1.0123e-194	0.457369	0.483	0.049	1.6221e-190
CENPM	1.3598e-194	0.410907	0.403	0.024	2.17895e-190
SNRNP27	2.57933e-194	0.500226	0.537	0.071	4.13312e-190
ZNHIT3	2.88872e-194	0.501454	0.534	0.07	4.62888e-190
EIF4G1	3.48938e-194	0.510859	0.549	0.077	5.59139e-190
MCM6	3.82554e-194	0.404992	0.435	0.033	6.13004e-190
ZCRB1	4.36604e-194	0.466755	0.524	0.065	6.99614e-190
SCO2	5.04149e-194	0.411622	0.43	0.032	8.07848e-190
VPS25	7.59106e-194	0.437389	0.463	0.043	1.21639e-189
YDJC	7.72635e-194	0.429454	0.456	0.041	1.23807e-189
COPS6	9.68021e-194	0.527389	0.595	0.099	1.55116e-189
UFC1	1.20582e-193	0.562904	0.676	0.146	1.9322e-189
IFITM1	1.69484e-193	0.757183	0.969	0.623	2.71581e-189
DPH3	4.55396e-193	0.390823	0.407	0.026	7.29726e-189
DYNLT1	4.97815e-193	0.463521	0.512	0.061	7.97699e-189
EIF3E	5.12697e-193	0.694124	0.826	0.309	8.21546e-189
MRPL42	5.28019e-193	0.385321	0.41	0.026	8.46098e-189
HAX1	8.17075e-193	0.491935	0.58	0.09	1.30928e-188
CDK2AP2	1.05612e-192	0.515402	0.6	0.101	1.69232e-188
JUNB	1.31273e-192	0.600778	0.664	0.139	2.10353e-188
VCP	2.11773e-192	0.516939	0.58	0.093	3.39345e-188
TRIM28	3.65649e-192	0.474102	0.486	0.052	5.85916e-188
MAPKAPK3	4.45743e-192	0.385985	0.403	0.025	7.14259e-188
TAF1D	6.15519e-192	0.552777	0.595	0.101	9.86307e-188
POLE4	7.16958e-192	0.515598	0.575	0.09	1.14885e-187
MLF2	9.03665e-192	0.45043	0.498	0.056	1.44803e-187
SLC25A11	1.26186e-191	0.445868	0.455	0.041	2.022e-187
URM1	1.2992e-191	0.447698	0.488	0.052	2.08184e-187
SURF2	1.55628e-191	0.430834	0.441	0.037	2.49378e-187
MT2A	1.58793e-191	0.972172	0.83	0.303	2.5445e-187
PRPF31	2.03292e-191	0.445312	0.443	0.037	3.25755e-187
RABEP1	2.11892e-191	0.455528	0.455	0.041	3.39535e-187
EIF4H	2.26715e-191	0.500801	0.554	0.081	3.63288e-187
EXOSC5	3.08289e-191	0.412088	0.445	0.038	4.94002e-187
PYURF	3.57744e-191	0.542093	0.626	0.119	5.73249e-187
MATR3	3.58495e-191	0.506096	0.608	0.107	5.74452e-187
SRSF6	4.85047e-191	0.498704	0.498	0.057	7.77239e-187
GMPS	6.76862e-191	0.402368	0.407	0.027	1.0846e-186
PSMG3	7.26782e-191	0.435608	0.46	0.043	1.1646e-186
CORO1B	4.6071e-190	0.491138	0.451	0.041	7.38242e-186
SRRT	5.60496e-190	0.41123	0.44	0.037	8.98139e-186
WDR18	7.90634e-190	0.430435	0.45	0.04	1.26691e-185
MKKS	9.73623e-190	0.427992	0.474	0.048	1.56013e-185
FTSJ3	1.01591e-189	0.409164	0.397	0.024	1.6279e-185
CENPU	1.0541e-189	0.373234	0.344	0.011	1.68908e-185
UMPS	1.5393e-189	0.422888	0.436	0.036	2.46657e-185
SCAMP3	1.70365e-189	0.441777	0.494	0.056	2.72993e-185
IMMT	2.9171e-189	0.403712	0.435	0.036	4.67436e-185
EIF2B3	3.69045e-189	0.378846	0.383	0.021	5.91358e-185
DPP7	6.63106e-189	0.46603	0.512	0.064	1.06256e-184
CCDC86	6.69641e-189	0.36083	0.388	0.022	1.07303e-184
TMEM50A	8.62663e-189	0.532362	0.631	0.123	1.38233e-184
REEP5	8.74156e-189	0.430938	0.493	0.056	1.40075e-184
AHCY	1.11483e-188	0.446981	0.445	0.039	1.78641e-184
REXO2	1.12176e-188	0.495113	0.555	0.083	1.79751e-184
MRPS2	1.22695e-188	0.386054	0.408	0.028	1.96606e-184
MT-CYB	1.25657e-188	0.626744	0.979	0.784	2.01353e-184
LCP1	1.45732e-188	0.569219	0.653	0.138	2.33521e-184
AIP	1.64975e-188	0.524456	0.579	0.094	2.64355e-184
RP1-241P17.4	1.99891e-188	0.389647	0.425	0.033	3.20305e-184
AAMP	2.69955e-188	0.458664	0.478	0.051	4.32575e-184
GMFG	3.41841e-188	0.67761	0.888	0.419	5.47766e-184
PRPF4B	7.48319e-188	0.503935	0.564	0.087	1.19911e-183
DNAJB6	9.05883e-188	0.51493	0.587	0.1	1.45159e-183
DRG1	1.47257e-187	0.443866	0.481	0.052	2.35965e-183
NAE1	2.17942e-187	0.458899	0.489	0.056	3.4923e-183
PAFAH1B3	2.22073e-187	0.415438	0.438	0.037	3.5585e-183
MRPL35	2.8048e-187	0.373521	0.387	0.022	4.49441e-183
LYPLA2	3.02698e-187	0.38614	0.408	0.028	4.85043e-183
EIF3B	3.45411e-187	0.43699	0.486	0.054	5.53486e-183
CCL3	4.12032e-187	0.884585	0.835	0.316	6.60239e-183
CHURC1	4.36441e-187	0.638997	0.747	0.218	6.99353e-183
FAM96A	5.44414e-187	0.446306	0.494	0.057	8.72368e-183
FAM216A	5.48203e-187	0.386757	0.375	0.02	8.78441e-183
DNPEP	6.45324e-187	0.451378	0.473	0.05	1.03407e-182
CHD4	6.45508e-187	0.456062	0.511	0.064	1.03436e-182
ATG3	6.85019e-187	0.485793	0.534	0.074	1.09767e-182
ICT1	9.09028e-187	0.374216	0.405	0.028	1.45663e-182
RBM28	1.14407e-186	0.388976	0.425	0.034	1.83326e-182
BRD7	1.58445e-186	0.476326	0.519	0.068	2.53892e-182
TMPO	2.50213e-186	0.43321	0.463	0.046	4.00941e-182
MYCBP	5.49497e-186	0.386487	0.417	0.031	8.80515e-182
PES1	5.56754e-186	0.429839	0.464	0.047	8.92143e-182
TUSC2	1.33486e-185	0.44753	0.474	0.051	2.13898e-181
EXOSC9	2.23731e-185	0.403552	0.412	0.03	3.58507e-181
RNF7	2.67369e-185	0.496571	0.59	0.103	4.28432e-181
MRPL40	3.08804e-185	0.483749	0.496	0.06	4.94827e-181
LARS	4.33456e-185	0.494036	0.545	0.081	6.9457e-181
UTP14A	6.53042e-185	0.360907	0.377	0.021	1.04643e-180
SOD2	7.97264e-185	0.597368	0.714	0.186	1.27754e-180
CAP1	8.36116e-185	0.507253	0.597	0.105	1.33979e-180
TRAF1	8.93112e-185	0.489154	0.493	0.059	1.43112e-180
RPP21	1.21487e-184	0.464555	0.531	0.074	1.94671e-180
UTP6	1.4966e-184	0.392434	0.41	0.03	2.39815e-180
FUNDC2	1.65953e-184	0.457257	0.524	0.071	2.65923e-180
UBBP4	2.17842e-184	0.447901	0.486	0.056	3.49069e-180
FAM60A	2.1987e-184	0.479107	0.498	0.061	3.5232e-180
SHMT2	2.36153e-184	0.452501	0.473	0.051	3.78412e-180
VTI1B	2.48885e-184	0.423668	0.506	0.063	3.98813e-180
CITE-CD38-ATCCTTTGCCGTGTT	4.27662e-184	0.791044	1	0.999	6.85286e-180
SF3A3	4.64196e-184	0.434592	0.464	0.048	7.43828e-180
TSFM	5.10885e-184	0.37397	0.412	0.031	8.18642e-180
GNB2	5.32929e-184	0.499206	0.545	0.082	8.53965e-180
CBR1	8.48112e-184	0.404389	0.451	0.043	1.35901e-179
PDHA1	1.31741e-183	0.433229	0.433	0.038	2.11102e-179
NANS	1.76969e-183	0.380257	0.4	0.028	2.83575e-179
MCUR1	1.8393e-183	0.383905	0.375	0.021	2.9473e-179
EIF3D	1.84559e-183	0.578041	0.673	0.158	2.95738e-179
POP5	2.13019e-183	0.458765	0.499	0.063	3.41342e-179
EID1	4.38407e-183	0.574471	0.612	0.119	7.02504e-179
BST2	1.17568e-182	0.586508	0.663	0.149	1.8839e-178
CSTB	1.52459e-182	0.608894	0.721	0.197	2.44301e-178
C1D	2.40398e-182	0.405125	0.451	0.044	3.85213e-178
RBM27	2.63494e-182	0.445523	0.504	0.064	4.22223e-178
RAP1A	4.87224e-182	0.476049	0.574	0.095	7.80728e-178
C4orf32	6.78563e-182	0.413762	0.428	0.037	1.08733e-177
RPN2	8.11687e-182	0.452928	0.531	0.075	1.30065e-177
NUDCD2	1.23308e-181	0.459585	0.501	0.063	1.97589e-177
TRAPPC3	1.2401e-181	0.490272	0.507	0.067	1.98714e-177
MAP2K3	1.67345e-181	0.365779	0.387	0.025	2.68154e-177
MFNG	1.74131e-181	0.474285	0.532	0.077	2.79028e-177
CCDC25	1.82424e-181	0.455035	0.489	0.06	2.92317e-177
RPS17L	1.96927e-181	0.529307	0.567	0.095	3.15556e-177
ORC6	3.09209e-181	0.3492	0.322	0.009	4.95476e-177
CD81	8.03975e-181	0.44029	0.473	0.053	1.28829e-176
CHCHD5	8.39038e-181	0.466076	0.536	0.079	1.34447e-176
MTPN	1.02938e-180	0.433714	0.468	0.051	1.64947e-176
TMX2	1.07784e-180	0.388267	0.405	0.03	1.72712e-176
MRPS14	1.5031e-180	0.42292	0.46	0.049	2.40857e-176
CTC-524C5.2	1.87228e-180	0.343173	0.336	0.012	3.00014e-176
PAPOLA	2.02797e-180	0.486876	0.59	0.106	3.24961e-176
SEC11A	2.06848e-180	0.460625	0.529	0.077	3.31454e-176
ARL1	2.37502e-180	0.358467	0.397	0.028	3.80574e-176
RALA	2.48265e-180	0.422039	0.468	0.051	3.97821e-176
GLRX2	2.96731e-180	0.345092	0.347	0.015	4.75482e-176
GTF2H5	3.39164e-180	0.455719	0.496	0.062	5.43476e-176
TUBG1	3.56722e-180	0.330162	0.332	0.012	5.71612e-176
NUBP2	5.01511e-180	0.43236	0.463	0.05	8.03622e-176
SUCLG1	6.41635e-180	0.42517	0.471	0.053	1.02816e-175
PDXK	8.81168e-180	0.374373	0.395	0.028	1.41198e-175
TNFRSF4	1.3596e-179	0.588152	0.511	0.071	2.17862e-175
DDOST	1.58178e-179	0.456392	0.511	0.069	2.53465e-175
C1orf122	3.67445e-179	0.425161	0.441	0.043	5.88794e-175
WDR4	5.01361e-179	0.322639	0.331	0.012	8.03381e-175
SMARCB1	5.33708e-179	0.410996	0.428	0.039	8.55214e-175
GART	5.85284e-179	0.388505	0.435	0.04	9.3786e-175
SRPR	7.01821e-179	0.416342	0.451	0.046	1.1246e-174
PTRH1	1.81585e-178	0.347382	0.387	0.026	2.90971e-174
MRPL39	2.46281e-178	0.380695	0.393	0.028	3.94641e-174
TMED2	3.08262e-178	0.47144	0.517	0.074	4.93959e-174
TNIP2	3.4861e-178	0.41446	0.423	0.037	5.58612e-174
SRSF10	4.59558e-178	0.435984	0.476	0.056	7.36395e-174
PRICKLE4	6.85386e-178	0.3834	0.402	0.031	1.09826e-173
RP11-386I14.4	7.58702e-178	0.426016	0.408	0.033	1.21574e-173
PNP	9.95414e-178	0.364321	0.39	0.027	1.59505e-173
SLC39A4	2.81496e-177	0.360821	0.362	0.02	4.51069e-173
DHX36	2.99313e-177	0.490863	0.577	0.103	4.7962e-173
EIF3H	1.07191e-176	0.631231	0.798	0.294	1.71763e-172
CSNK2A1	1.24053e-176	0.415186	0.408	0.034	1.98782e-172
SDAD1	1.43005e-176	0.419669	0.431	0.041	2.29151e-172
RALY	1.54519e-176	0.469859	0.517	0.074	2.47601e-172
MED10	1.76721e-176	0.502806	0.592	0.111	2.83177e-172
LRPAP1	2.19309e-176	0.426373	0.489	0.062	3.51421e-172
CDC26	2.38478e-176	0.496779	0.577	0.104	3.82138e-172
RBBP4	2.90071e-176	0.469316	0.526	0.078	4.6481e-172
RBCK1	4.05998e-176	0.462082	0.481	0.06	6.50571e-172
CCAR1	5.07708e-176	0.415909	0.469	0.055	8.13551e-172
IFT57	5.43101e-176	0.364293	0.385	0.027	8.70265e-172
MAZ	5.82961e-176	0.420664	0.418	0.037	9.34136e-172
NDUFA5	6.46559e-176	0.46029	0.516	0.074	1.03605e-171
IDH3B	8.16598e-176	0.451094	0.501	0.068	1.30852e-171
ALKBH2	9.09941e-176	0.385838	0.37	0.023	1.45809e-171
TCOF1	9.33051e-176	0.38284	0.4	0.031	1.49512e-171
SREK1IP1	1.29282e-175	0.440767	0.493	0.065	2.07162e-171
PPP4R2	1.58537e-175	0.408675	0.446	0.046	2.5404e-171
RAB10	1.62698e-175	0.384985	0.425	0.039	2.60707e-171
EIF2B1	2.50769e-175	0.378535	0.412	0.035	4.01833e-171
NSRP1	3.31725e-175	0.465486	0.554	0.091	5.31556e-171
HIGD2A	3.41607e-175	0.600275	0.702	0.191	5.47392e-171
PPID	4.3557e-175	0.400876	0.405	0.033	6.97957e-171
RBPJ	5.75108e-175	0.449592	0.484	0.062	9.21553e-171
NOL10	5.93464e-175	0.33953	0.342	0.016	9.50967e-171
GRSF1	6.39699e-175	0.406019	0.433	0.042	1.02505e-170
MSN	6.88694e-175	0.491058	0.575	0.103	1.10356e-170
ARF4	8.98265e-175	0.394745	0.436	0.043	1.43938e-170
MAD2L2	1.31697e-174	0.38545	0.4	0.032	2.11031e-170
POLR1C	1.58605e-174	0.39118	0.4	0.032	2.54149e-170
LYRM4	1.70052e-174	0.442553	0.507	0.071	2.72491e-170
C7orf55-LUC7L2	1.8146e-174	0.42316	0.433	0.043	2.90772e-170
CHMP5	1.85261e-174	0.454863	0.491	0.065	2.96862e-170
SLC25A33	1.86689e-174	0.34014	0.35	0.018	2.9915e-170
TBCB	2.2172e-174	0.501095	0.565	0.101	3.55284e-170
C9orf114	2.74882e-174	0.362065	0.385	0.027	4.40471e-170
EWSR1	3.80334e-174	0.500865	0.557	0.095	6.09448e-170
CD8A	4.57618e-174	0.501307	0.547	0.09	7.33287e-170
ARL6IP4	8.62943e-174	0.596254	0.77	0.255	1.38278e-169
COMMD1	1.57365e-173	0.392038	0.448	0.048	2.52161e-169
POLDIP2	1.66896e-173	0.386396	0.43	0.042	2.67433e-169
CSK	1.94279e-173	0.479123	0.545	0.089	3.11313e-169
ARMC10	2.10367e-173	0.344671	0.364	0.022	3.37091e-169
C1orf86	3.26641e-173	0.446366	0.494	0.066	5.2341e-169
SRSF1	3.8683e-173	0.480974	0.536	0.086	6.19856e-169
CBX1	7.26605e-173	0.42056	0.451	0.049	1.16431e-168
IAH1	8.50111e-173	0.40356	0.461	0.053	1.36222e-168
TIMM17B	8.97746e-173	0.424094	0.476	0.059	1.43855e-168
GCSH	9.04992e-173	0.365969	0.362	0.022	1.45016e-168
KXD1	1.61658e-172	0.420917	0.45	0.049	2.59041e-168
PINX1	1.78322e-172	0.384758	0.375	0.026	2.85744e-168
RRM1	1.876e-172	0.357216	0.367	0.023	3.0061e-168
WBP4	2.54011e-172	0.399126	0.417	0.038	4.07028e-168
MCM10	3.30615e-172	0.282739	0.279	0.003	5.29777e-168
TSPO	3.33485e-172	0.542107	0.65	0.149	5.34377e-168
MAT2A	4.14749e-172	0.388626	0.436	0.044	6.64593e-168
CHTOP	4.17733e-172	0.401617	0.42	0.039	6.69376e-168
URI1	9.07076e-172	0.436966	0.534	0.083	1.4535e-167
MAP7D3	9.42782e-172	0.371354	0.387	0.029	1.51071e-167
RSRC1	1.02588e-171	0.506758	0.565	0.102	1.64387e-167
BCAS2	1.83288e-171	0.444551	0.486	0.064	2.93701e-167
NOC4L	2.85879e-171	0.335905	0.345	0.018	4.58092e-167
TNF	3.73519e-171	0.560485	0.473	0.06	5.98527e-167
S100A11	1.10563e-170	0.602715	0.696	0.194	1.77166e-166
BEST1	1.56438e-170	0.595862	0.717	0.208	2.50677e-166
ISCA1	1.72572e-170	0.388902	0.408	0.036	2.7653e-166
MCM4	1.84709e-170	0.356615	0.334	0.015	2.95978e-166
CTPS1	2.11184e-170	0.341866	0.344	0.018	3.38401e-166
ATP6V1E1	2.14662e-170	0.436377	0.476	0.061	3.43974e-166
EXOSC1	2.33205e-170	0.414013	0.455	0.052	3.73688e-166
UNG	2.7126e-170	0.359854	0.347	0.019	4.34667e-166
ARF5	2.9486e-170	0.488104	0.575	0.109	4.72483e-166
GOSR2	4.01281e-170	0.327587	0.332	0.015	6.43013e-166
SUZ12	5.87571e-170	0.40429	0.443	0.048	9.41524e-166
GRB2	6.96843e-170	0.463142	0.514	0.078	1.11662e-165
TAPBP	9.50723e-170	0.558389	0.669	0.169	1.52344e-165
ACN9	1.32812e-169	0.412682	0.443	0.049	2.12819e-165
SLC25A19	1.85858e-169	0.318681	0.324	0.013	2.97819e-165
CCNC	1.96344e-169	0.365515	0.417	0.039	3.14622e-165
MED4	2.02314e-169	0.453424	0.545	0.091	3.24188e-165
SNW1	2.09301e-169	0.438757	0.511	0.075	3.35384e-165
AATF	2.14685e-169	0.396431	0.415	0.039	3.44012e-165
STAU1	2.61446e-169	0.378229	0.408	0.037	4.18941e-165
EIF1B	2.78083e-169	0.434955	0.502	0.072	4.456e-165
HSPBP1	4.20872e-169	0.362148	0.388	0.031	6.74406e-165
UPF2	6.47608e-169	0.523434	0.656	0.158	1.03773e-164
DNAJA2	6.87398e-169	0.374543	0.431	0.044	1.10149e-164
SSR2	7.49775e-169	0.575534	0.78	0.271	1.20144e-164
VKORC1	9.78533e-169	0.368284	0.382	0.029	1.568e-164
ZRANB2	1.06198e-168	0.497187	0.579	0.11	1.70172e-164
ATAD3B	1.10066e-168	0.304184	0.312	0.011	1.7637e-164
HDGF	1.10273e-168	0.375268	0.402	0.035	1.76702e-164
ZNF259	1.95881e-168	0.340341	0.357	0.022	3.1388e-164
METTL1	3.53996e-168	0.347132	0.355	0.022	5.67243e-164
LTB	5.3268e-168	1.23929	0.919	0.686	8.53566e-164
CRELD2	6.20356e-168	0.374207	0.393	0.033	9.94059e-164
RAB27A	9.60773e-168	0.372476	0.405	0.036	1.53954e-163
C1orf43	1.05848e-167	0.456871	0.502	0.074	1.6961e-163
DYNLRB1	1.29616e-167	0.438666	0.507	0.075	2.07696e-163
HRAS	1.93716e-167	0.341982	0.342	0.019	3.10411e-163
CMC1	2.08206e-167	0.403628	0.43	0.045	3.33629e-163
DERL2	3.41952e-167	0.361816	0.418	0.041	5.47944e-163
GADD45B	3.60562e-167	0.530789	0.56	0.104	5.77765e-163
ACIN1	3.72663e-167	0.40424	0.433	0.046	5.97155e-163
NDUFS2	4.68541e-167	0.422773	0.481	0.064	7.50789e-163
DBF4	4.76806e-167	0.363814	0.369	0.026	7.64034e-163
IDH3A	5.13033e-167	0.341406	0.339	0.018	8.22084e-163
CS	5.75168e-167	0.406699	0.474	0.061	9.21649e-163
CAPZB	5.8443e-167	0.536425	0.688	0.183	9.36491e-163
REL	8.69886e-167	0.468018	0.423	0.044	1.3939e-162
SBDS	1.46607e-166	0.430601	0.469	0.06	2.34922e-162
ISG15	1.73675e-166	0.709307	0.779	0.271	2.78296e-162
NOC3L	1.82622e-166	0.381017	0.383	0.03	2.92634e-162
RAB2A	1.89937e-166	0.438328	0.476	0.064	3.04355e-162
SLC35B1	2.72477e-166	0.36233	0.372	0.027	4.36617e-162
ZNF207	3.8236e-166	0.443284	0.511	0.078	6.12694e-162
HM13	4.76915e-166	0.464409	0.511	0.079	7.64209e-162
LETM1	8.42989e-166	0.344575	0.35	0.021	1.35081e-161
LYST	9.88327e-166	0.379483	0.35	0.022	1.58369e-161
ABCF2	1.20062e-165	0.360216	0.369	0.027	1.92387e-161
RNASEH2A	1.2145e-165	0.326404	0.336	0.017	1.94611e-161
TMBIM4	1.23067e-165	0.461036	0.587	0.116	1.97202e-161
TRUB2	3.59749e-165	0.33298	0.362	0.024	5.76461e-161
RNASEH2B	3.77713e-165	0.412191	0.433	0.048	6.05247e-161
C4orf3	4.15224e-165	0.557073	0.75	0.246	6.65354e-161
KIF5B	4.29355e-165	0.42814	0.474	0.064	6.87998e-161
ENOPH1	6.13949e-165	0.323983	0.345	0.02	9.83792e-161
RWDD4	1.18347e-164	0.336755	0.355	0.023	1.89639e-160
NIT2	1.52696e-164	0.366751	0.382	0.031	2.4468e-160
NAA15	1.57694e-164	0.400608	0.412	0.041	2.52689e-160
BAZ1B	2.3182e-164	0.407768	0.413	0.041	3.71468e-160
CXCR3	3.98217e-164	0.427917	0.405	0.039	6.38102e-160
ANAPC16	5.05309e-164	0.554066	0.693	0.196	8.09707e-160
APITD1	5.54934e-164	0.279545	0.271	0.004	8.89226e-160
NDUFS4	5.77686e-164	0.428565	0.493	0.072	9.25684e-160
PPIL1	6.89083e-164	0.292747	0.321	0.014	1.10419e-159
UBE2A	7.8016e-164	0.361289	0.39	0.034	1.25013e-159
UBE2K	8.12705e-164	0.420196	0.451	0.055	1.30228e-159
USP14	9.73233e-164	0.379573	0.405	0.038	1.55951e-159
ABT1	1.06493e-163	0.389098	0.425	0.045	1.70644e-159
GLO1	1.11788e-163	0.389158	0.407	0.039	1.7913e-159
IER3	1.2454e-163	0.463596	0.369	0.028	1.99563e-159
SAMM50	1.62426e-163	0.33956	0.383	0.031	2.60271e-159
PCNP	2.25764e-163	0.456006	0.529	0.089	3.61764e-159
ALG5	2.5034e-163	0.394708	0.423	0.045	4.01145e-159
MRPS18A	3.29562e-163	0.372532	0.397	0.036	5.2809e-159
CLEC2D	5.44651e-163	0.484631	0.54	0.097	8.72748e-159
NDUFB5	5.4941e-163	0.488204	0.549	0.101	8.80374e-159
ALG13	6.88226e-163	0.349999	0.379	0.03	1.10281e-158
PTPLAD1	7.72212e-163	0.348466	0.355	0.024	1.23739e-158
MCM2	8.74925e-163	0.359734	0.387	0.033	1.40198e-158
CBWD5	9.15858e-163	0.39031	0.426	0.046	1.46757e-158
DCTN6	9.56825e-163	0.370885	0.408	0.04	1.53322e-158
MT-ND6	1.07162e-162	0.512446	0.574	0.114	1.71717e-158
MAPRE1	1.13578e-162	0.38579	0.41	0.041	1.81997e-158
DHFR	1.21075e-162	0.348884	0.352	0.023	1.9401e-158
HAUS1	1.36392e-162	0.369667	0.393	0.035	2.18555e-158
CSNK1A1	1.90421e-162	0.458448	0.522	0.087	3.05131e-158
MRPL53	2.09239e-162	0.425296	0.484	0.07	3.35285e-158
LCK	2.85593e-162	0.553631	0.693	0.197	4.57634e-158
DNPH1	3.51331e-162	0.549134	0.66	0.172	5.62973e-158
EFHD2	5.85944e-162	0.420979	0.511	0.081	9.38917e-158
RP11-386G11.10	6.99193e-162	0.544706	0.669	0.181	1.12039e-157
WDR77	8.44898e-162	0.36721	0.382	0.032	1.35386e-157
FARSB	9.61267e-162	0.387587	0.425	0.046	1.54033e-157
DFFA	1.88114e-161	0.358694	0.374	0.03	3.01434e-157
RFXANK	1.89312e-161	0.360799	0.388	0.034	3.03354e-157
CAPRIN1	3.1288e-161	0.367083	0.413	0.042	5.01359e-157
MLX	3.15526e-161	0.4067	0.451	0.056	5.056e-157
JAGN1	3.75109e-161	0.389103	0.451	0.056	6.01075e-157
DGUOK	4.19276e-161	0.500124	0.62	0.143	6.71848e-157
TRMT61A	4.37642e-161	0.287598	0.309	0.013	7.01278e-157
C12orf44	7.15697e-161	0.325724	0.354	0.024	1.14683e-156
CDCA4	9.53838e-161	0.315406	0.342	0.021	1.52843e-156
DNAJC21	1.02787e-160	0.419388	0.445	0.055	1.64706e-156
YWHAG	1.23532e-160	0.363769	0.4	0.038	1.97948e-156
PFKP	1.24557e-160	0.32007	0.332	0.019	1.9959e-156
HARS	1.27224e-160	0.369503	0.413	0.043	2.03863e-156
NUBP1	1.50168e-160	0.368617	0.408	0.041	2.40628e-156
PGLS	2.08971e-160	0.402029	0.478	0.067	3.34855e-156
CLINT1	2.28437e-160	0.369049	0.431	0.049	3.66047e-156
SLA	3.50808e-160	0.433028	0.415	0.044	5.62134e-156
GPR171	4.34529e-160	0.386782	0.385	0.034	6.96289e-156
SMIM11	7.70752e-160	0.400317	0.456	0.059	1.23505e-155
DIS3	1.32422e-159	0.328979	0.337	0.02	2.12193e-155
ASXL1	1.44042e-159	0.354216	0.408	0.042	2.30813e-155
TPR	2.25127e-159	0.521486	0.61	0.139	3.60743e-155
EBPL	2.45176e-159	0.395587	0.456	0.059	3.9287e-155
MSH6	2.47663e-159	0.349303	0.345	0.023	3.96855e-155
NUDT22	2.63827e-159	0.348659	0.407	0.041	4.22756e-155
E2F4	3.05819e-159	0.369026	0.375	0.031	4.90044e-155
PTGES2	3.12546e-159	0.3355	0.364	0.028	5.00824e-155
MAK16	3.54526e-159	0.309781	0.337	0.02	5.68093e-155
LARP1	3.7624e-159	0.39476	0.415	0.045	6.02887e-155
WDR12	4.05887e-159	0.349905	0.388	0.035	6.50393e-155
ARPC5	4.10522e-159	0.496676	0.643	0.16	6.57821e-155
RPAP3	4.39466e-159	0.369192	0.435	0.051	7.042e-155
IL2RG	4.40026e-159	0.531826	0.699	0.203	7.05098e-155
ALG3	4.72992e-159	0.340793	0.367	0.029	7.57922e-155
ADSS	6.48274e-159	0.397239	0.425	0.049	1.03879e-154
VPS35	7.7823e-159	0.394466	0.464	0.063	1.24704e-154
ATG12	8.51748e-159	0.400575	0.484	0.071	1.36484e-154
TRMT1	1.15926e-158	0.336809	0.359	0.027	1.8576e-154
MRPS9	1.17532e-158	0.363167	0.375	0.031	1.88333e-154
TXLNG	1.19938e-158	0.347101	0.367	0.029	1.92189e-154
CHAF1A	1.41642e-158	0.289028	0.286	0.008	2.26967e-154
VMA21	1.50762e-158	0.361307	0.407	0.042	2.4158e-154
NOL12	1.65742e-158	0.318799	0.355	0.026	2.65584e-154
WDR61	1.69834e-158	0.370678	0.42	0.046	2.72142e-154
UBE2J2	2.05166e-158	0.369608	0.41	0.043	3.28758e-154
PHF14	2.29304e-158	0.43295	0.483	0.072	3.67436e-154
TERF2IP	3.58582e-158	0.453465	0.512	0.086	5.74592e-154
BRMS1	4.16308e-158	0.361072	0.405	0.041	6.67092e-154
POLR2C	5.09672e-158	0.427465	0.469	0.066	8.16698e-154
FXR1	1.17683e-157	0.37963	0.45	0.058	1.88575e-153
SEH1L	1.22821e-157	0.33709	0.362	0.028	1.96809e-153
NAP1L4	1.43819e-157	0.507835	0.645	0.162	2.30455e-153
CD97	1.65273e-157	0.360563	0.359	0.027	2.64834e-153
PTPRCAP	1.84303e-157	0.632867	0.863	0.449	2.95328e-153
GNAS	2.09961e-157	0.423823	0.54	0.098	3.36441e-153
YEATS4	2.10931e-157	0.391586	0.413	0.045	3.37996e-153
CDKN2AIPNL	2.38421e-157	0.326205	0.367	0.029	3.82045e-153
SNX5	3.15022e-157	0.337451	0.369	0.03	5.04791e-153
MATK	3.58238e-157	0.318515	0.302	0.013	5.7404e-153
DYNC1I2	4.46768e-157	0.434627	0.519	0.089	7.15901e-153
ORMDL2	4.86493e-157	0.3933	0.453	0.06	7.79557e-153
CIRBP	5.09372e-157	0.574543	0.792	0.3	8.16217e-153
SAFB	5.13892e-157	0.371872	0.425	0.049	8.2346e-153
DUS1L	5.15236e-157	0.366812	0.388	0.037	8.25614e-153
CIAPIN1	1.79863e-156	0.35736	0.374	0.032	2.88212e-152
RN7SL1	2.93544e-156	0.420497	0.46	0.063	4.70375e-152
GBP2	3.61861e-156	0.51706	0.6	0.135	5.79846e-152
ATF4	5.1772e-156	0.433354	0.455	0.062	8.29595e-152
NENF	5.78244e-156	0.390028	0.456	0.061	9.26578e-152
KHSRP	5.93711e-156	0.306094	0.316	0.016	9.51363e-152
THOC6	8.71284e-156	0.361811	0.37	0.031	1.39615e-151
CCL4	8.95256e-156	0.904761	0.742	0.258	1.43456e-151
RAD1	1.84851e-155	0.325723	0.326	0.019	2.96205e-151
DDA1	1.93946e-155	0.330302	0.374	0.032	3.10779e-151
FXYD5	2.09544e-155	0.601643	0.876	0.44	3.35773e-151
RPS27L	2.41646e-155	0.561301	0.691	0.209	3.87213e-151
EXOC2	2.52011e-155	0.417985	0.364	0.03	4.03823e-151
WDR1	2.56887e-155	0.465917	0.511	0.089	4.11636e-151
MRPS30	2.81036e-155	0.351133	0.382	0.035	4.50332e-151
C16orf91	3.25037e-155	0.30162	0.317	0.017	5.20839e-151
SMARCA4	3.43196e-155	0.352592	0.367	0.031	5.49938e-151
ZC3H8	3.49285e-155	0.421641	0.466	0.066	5.59694e-151
NSFL1C	6.0768e-155	0.394811	0.436	0.055	9.73746e-151
YAF2	7.77732e-155	0.358795	0.402	0.042	1.24624e-150
C12orf10	8.49113e-155	0.405507	0.438	0.056	1.36062e-150
UCK2	8.80097e-155	0.312708	0.298	0.012	1.41027e-150
GOT2	1.76979e-154	0.390156	0.392	0.039	2.83591e-150
TBX21	1.82352e-154	0.337526	0.352	0.027	2.922e-150
PITPNB	2.06069e-154	0.37295	0.413	0.046	3.30205e-150
CDK11A	2.15256e-154	0.464083	0.504	0.086	3.44926e-150
NSMCE4A	2.77616e-154	0.331585	0.357	0.028	4.44851e-150
NUDCD1	3.09439e-154	0.300972	0.317	0.017	4.95845e-150
NFKB1	5.7893e-154	0.390563	0.418	0.049	9.27677e-150
FAM50A	6.67061e-154	0.333462	0.388	0.038	1.0689e-149
BLOC1S2	7.6739e-154	0.413435	0.446	0.06	1.22967e-149
HMOX2	8.62383e-154	0.434489	0.506	0.085	1.38188e-149
CDCA7L	8.71889e-154	0.310156	0.327	0.02	1.39711e-149
CNIH4	1.4276e-153	0.366205	0.421	0.05	2.28759e-149
COPS5	2.40511e-153	0.375782	0.44	0.057	3.85395e-149
RFC2	2.58775e-153	0.333895	0.34	0.024	4.14661e-149
PSMC3IP	3.41629e-153	0.286483	0.269	0.007	5.47427e-149
UBE2V1	1.08219e-152	0.401183	0.473	0.071	1.7341e-148
RABAC1	1.58924e-152	0.522999	0.656	0.182	2.54659e-148
SPRY1	1.76871e-152	0.339798	0.291	0.012	2.83418e-148
PQBP1	1.96834e-152	0.409948	0.474	0.072	3.15407e-148
TXNDC9	2.06242e-152	0.332882	0.385	0.037	3.30483e-148
C4orf27	2.22773e-152	0.347035	0.377	0.035	3.56972e-148
LAT	4.72038e-152	0.531317	0.63	0.161	7.56394e-148
PMVK	5.44851e-152	0.341932	0.388	0.039	8.7307e-148
OTUB1	5.80347e-152	0.389918	0.456	0.064	9.29948e-148
PHF19	6.17743e-152	0.319453	0.309	0.016	9.89871e-148
CDKN2D	7.32933e-152	0.425377	0.398	0.043	1.17445e-147
ACYP1	8.1521e-152	0.31469	0.327	0.021	1.30629e-147
IFNG	8.16212e-152	0.670354	0.727	0.241	1.3079e-147
ATAD3A	1.05889e-151	0.298974	0.298	0.013	1.69676e-147
GBP4	1.06855e-151	0.464136	0.491	0.081	1.71225e-147
BCL7C	1.3389e-151	0.374034	0.431	0.055	2.14546e-147
EIF2A	1.92308e-151	0.397937	0.456	0.065	3.08154e-147
VPS28	2.22306e-151	0.453815	0.598	0.137	3.56223e-147
PNPT1	3.34212e-151	0.341138	0.359	0.03	5.35541e-147
PPP1CB	4.39901e-151	0.413864	0.453	0.064	7.04898e-147
FAM103A1	5.05718e-151	0.34369	0.375	0.035	8.10362e-147
SREK1	5.58854e-151	0.356637	0.39	0.04	8.95507e-147
RFC1	5.70482e-151	0.40222	0.451	0.063	9.1414e-147
LINC00998	6.12321e-151	0.325373	0.345	0.026	9.81184e-147
DAP3	8.36267e-151	0.423677	0.479	0.076	1.34003e-146
MRPS22	1.03488e-150	0.351497	0.362	0.031	1.65829e-146
EIF2S3	1.03908e-150	0.485003	0.549	0.111	1.66502e-146
ARGLU1	1.09856e-150	0.54877	0.676	0.204	1.76033e-146
CHMP4A	1.74755e-150	0.469884	0.598	0.141	2.80028e-146
RHOF	1.85431e-150	0.37769	0.473	0.072	2.97135e-146
TMEM18	2.43753e-150	0.332741	0.365	0.032	3.9059e-146
KPNA3	2.49107e-150	0.310127	0.329	0.022	3.99169e-146
PDIA4	2.74266e-150	0.391017	0.407	0.047	4.39484e-146
TMEM183A	3.30669e-150	0.369976	0.4	0.044	5.29863e-146
RPP38	3.97216e-150	0.346176	0.388	0.04	6.36498e-146
SMARCE1	3.97377e-150	0.411946	0.46	0.067	6.36756e-146
SIAH2	4.94173e-150	0.343139	0.347	0.027	7.91862e-146
AP000350.4	5.37267e-150	0.333797	0.402	0.044	8.60916e-146
THUMPD3	6.25799e-150	0.348733	0.369	0.034	1.00278e-145
SMARCC1	9.01884e-150	0.373064	0.41	0.048	1.44518e-145
DBNL	9.42574e-150	0.409393	0.491	0.081	1.51038e-145
DDX3X	9.57829e-150	0.421778	0.479	0.076	1.53482e-145
SNX3	1.40995e-149	0.442316	0.534	0.104	2.25931e-145
RCC1	1.68847e-149	0.31582	0.342	0.026	2.7056e-145
RNASEK	1.89647e-149	0.487785	0.608	0.149	3.0389e-145
TK1	2.44687e-149	0.327622	0.286	0.012	3.92087e-145
CTC-479C5.12	2.49467e-149	0.324575	0.35	0.028	3.99745e-145
UBA2	3.16969e-149	0.3773	0.412	0.049	5.07911e-145
NOC2L	4.67901e-149	0.394511	0.453	0.065	7.49765e-145
DDX55	7.04086e-149	0.290257	0.299	0.015	1.12823e-144
ERI3	8.60723e-149	0.324254	0.367	0.034	1.37922e-144
AKR1B1	9.3e-149	0.401434	0.476	0.075	1.49023e-144
PLEKHJ1	9.93556e-149	0.373588	0.405	0.047	1.59207e-144
PRPF19	1.20313e-148	0.330028	0.364	0.032	1.9279e-144
GTF2F2	1.51059e-148	0.301537	0.316	0.019	2.42057e-144
GEMIN7	2.60015e-148	0.332322	0.359	0.031	4.16648e-144
LSM12	2.87068e-148	0.346474	0.362	0.032	4.59998e-144
ECH1	4.23655e-148	0.451602	0.564	0.122	6.78865e-144
TMEM97	4.62809e-148	0.304194	0.309	0.017	7.41605e-144
CD164	6.56651e-148	0.401308	0.478	0.076	1.05222e-143
SFXN4	9.62713e-148	0.302184	0.316	0.019	1.54265e-143
NDFIP1	9.66493e-148	0.506563	0.597	0.145	1.54871e-143
MTHFD1L	1.00249e-147	0.281956	0.281	0.011	1.6064e-143
CDC45	1.02259e-147	0.288028	0.26	0.006	1.63861e-143
EMC8	1.18181e-147	0.33469	0.355	0.031	1.89373e-143
YTHDF2	1.19974e-147	0.360441	0.383	0.04	1.92247e-143
SEC13	1.28058e-147	0.351981	0.369	0.035	2.052e-143
TCF25	1.33491e-147	0.487607	0.575	0.131	2.13906e-143
OCIAD2	1.36853e-147	0.559056	0.749	0.277	2.19294e-143
PSMG4	1.7657e-147	0.361165	0.418	0.052	2.82936e-143
HMBS	1.93017e-147	0.266157	0.266	0.008	3.0929e-143
SMIM15	2.07616e-147	0.321662	0.331	0.023	3.32683e-143
PTRH2	2.69232e-147	0.305817	0.345	0.028	4.31418e-143
FAM177A1	4.65634e-147	0.397653	0.436	0.06	7.46132e-143
S100A10	5.385e-147	0.553795	0.742	0.267	8.62893e-143
LARP7	5.7833e-147	0.431481	0.506	0.091	9.26716e-143
MRPL48	6.93474e-147	0.341484	0.387	0.041	1.11122e-142
CLDND1	7.96543e-147	0.380357	0.44	0.061	1.27638e-142
ZCCHC10	1.02294e-146	0.353158	0.413	0.05	1.63915e-142
SNAPC5	1.34269e-146	0.383184	0.402	0.047	2.15152e-142
HDAC1	1.55341e-146	0.40279	0.453	0.067	2.48919e-142
PLGRKT	1.71741e-146	0.352154	0.398	0.045	2.75198e-142
PSMF1	1.93929e-146	0.370263	0.421	0.054	3.10752e-142
RTFDC1	2.12216e-146	0.385096	0.453	0.067	3.40054e-142
TMEM14C	2.16729e-146	0.402548	0.453	0.067	3.47287e-142
CNOT7	2.64223e-146	0.380347	0.456	0.068	4.23391e-142
RAB11A	2.97935e-146	0.379337	0.423	0.055	4.77412e-142
MRPL2	3.30931e-146	0.386631	0.393	0.045	5.30284e-142
SSBP4	3.99638e-146	0.379463	0.402	0.048	6.40381e-142
DHX9	4.11548e-146	0.349162	0.38	0.039	6.59465e-142
GNB1	6.51737e-146	0.362415	0.398	0.046	1.04434e-141
SNX17	9.7125e-146	0.37446	0.438	0.061	1.55633e-141
TAF10	1.11992e-145	0.386618	0.451	0.067	1.79456e-141
SEC62	2.03264e-145	0.54839	0.759	0.289	3.25711e-141
NDUFAF6	2.08171e-145	0.257935	0.283	0.012	3.33574e-141
MORF4L2	2.32449e-145	0.349788	0.39	0.043	3.72476e-141
LINC00493	2.43795e-145	0.484774	0.623	0.164	3.90657e-141
MAP2K2	2.6714e-145	0.379255	0.405	0.049	4.28065e-141
IK	7.42451e-145	0.484779	0.607	0.154	1.1897e-140
RNMT	7.55574e-145	0.409411	0.527	0.102	1.21073e-140
2020-09-15	8.03529e-145	0.470965	0.59	0.142	1.28757e-140
MPC2	1.36744e-144	0.338968	0.39	0.043	2.19118e-140
TPM4	1.75282e-144	0.404451	0.426	0.058	2.80871e-140
TLN1	3.37198e-144	0.395582	0.494	0.087	5.40326e-140
EIF4E2	5.25437e-144	0.368413	0.395	0.046	8.4196e-140
CSDE1	6.98396e-144	0.476462	0.567	0.13	1.11911e-139
DYNLL2	7.95373e-144	0.327286	0.362	0.035	1.27451e-139
ANXA7	9.92718e-144	0.387472	0.461	0.072	1.59073e-139
KNOP1	1.22164e-143	0.377661	0.433	0.06	1.95755e-139
IDH3G	1.34839e-143	0.348699	0.388	0.044	2.16066e-139
EXOSC2	1.4096e-143	0.305545	0.337	0.027	2.25874e-139
NFE2L2	1.58986e-143	0.402432	0.463	0.074	2.54759e-139
SCAND1	2.03095e-143	0.454382	0.597	0.143	3.25439e-139
MRPS18B	3.04615e-143	0.40823	0.474	0.079	4.88114e-139
TIPRL	3.2662e-143	0.317578	0.359	0.034	5.23375e-139
RGS16	4.38327e-143	0.388138	0.306	0.019	7.02375e-139
MIER1	4.59899e-143	0.394768	0.468	0.076	7.36943e-139
BTF3L4	5.27298e-143	0.349287	0.395	0.046	8.44943e-139
WBP11	6.26779e-143	0.371868	0.413	0.053	1.00435e-138
DTD1	6.79298e-143	0.308718	0.332	0.026	1.08851e-138
METRN	7.23433e-143	0.317395	0.301	0.017	1.15923e-138
LPXN	7.38632e-143	0.396921	0.478	0.08	1.18358e-138
C1orf35	7.90729e-143	0.357074	0.383	0.043	1.26706e-138
ARIH2	8.69829e-143	0.365342	0.403	0.05	1.39381e-138
FXN	9.84715e-143	0.354251	0.388	0.044	1.57791e-138
UBXN4	1.05118e-142	0.462966	0.602	0.152	1.68441e-138
PPP2R1A	1.0731e-142	0.405983	0.46	0.073	1.71953e-138
CDC5L	1.16368e-142	0.367679	0.379	0.041	1.86468e-138
RIOK1	1.41522e-142	0.349788	0.35	0.032	2.26775e-138
PDCD2L	1.81835e-142	0.302183	0.312	0.021	2.91373e-138
HERPUD1	3.23964e-142	0.366027	0.393	0.046	5.19121e-138
ATRAID	2.62259e-141	0.435853	0.511	0.099	4.20243e-137
COMMD4	2.98252e-141	0.300486	0.302	0.019	4.7792e-137
PITHD1	4.20488e-141	0.347102	0.392	0.046	6.7379e-137
RBM42	4.85396e-141	0.344988	0.369	0.038	7.77798e-137
ATAD5	5.48618e-141	0.267203	0.273	0.011	8.79105e-137
PRR7	6.7026e-141	0.266123	0.261	0.009	1.07402e-136
MZT1	7.67726e-141	0.295257	0.314	0.022	1.2302e-136
CIRH1A	8.08211e-141	0.338812	0.374	0.04	1.29508e-136
BCL2L12	9.3188e-141	0.297247	0.329	0.026	1.49324e-136
TIMMDC1	1.36101e-140	0.348084	0.375	0.041	2.18089e-136
UBXN1	1.3846e-140	0.514602	0.679	0.219	2.21869e-136
ETHE1	1.752e-140	0.340253	0.39	0.046	2.80741e-136
C7orf73	2.20304e-140	0.346485	0.412	0.054	3.53015e-136
NDUFV3	3.45925e-140	0.357004	0.385	0.045	5.54311e-136
SZRD1	5.91906e-140	0.363719	0.408	0.053	9.4847e-136
TMED3	7.83867e-140	0.328159	0.34	0.03	1.25607e-135
MPLKIP	1.34943e-139	0.395322	0.45	0.071	2.16232e-135
COPZ1	2.70154e-139	0.339304	0.385	0.045	4.32894e-135
WDR3	3.08376e-139	0.319966	0.306	0.02	4.94142e-135
GTPBP6	3.18172e-139	0.32713	0.334	0.028	5.09839e-135
FAM86A	4.11083e-139	0.275939	0.294	0.017	6.58719e-135
UTP23	4.18459e-139	0.319994	0.367	0.038	6.70539e-135
CDT1	6.10308e-139	0.278359	0.266	0.01	9.77958e-135
RABEPK	8.61237e-139	0.301455	0.304	0.02	1.38005e-134
TMX1	8.91504e-139	0.301482	0.322	0.025	1.42855e-134
NUP93	9.64274e-139	0.293082	0.304	0.02	1.54515e-134
NUP37	1.35081e-138	0.293974	0.302	0.02	2.16453e-134
TCEAL8	1.59233e-138	0.414867	0.483	0.087	2.55154e-134
DOHH	1.73142e-138	0.272559	0.291	0.016	2.77443e-134
QTRT1	2.57213e-138	0.324278	0.354	0.035	4.12158e-134
C1orf228	2.60427e-138	0.408067	0.375	0.043	4.17308e-134
TIAL1	2.64744e-138	0.327502	0.36	0.037	4.24226e-134
DDRGK1	3.70854e-138	0.320723	0.355	0.035	5.94256e-134
MFAP1	4.34096e-138	0.319957	0.319	0.024	6.95596e-134
SCNM1	4.86233e-138	0.379597	0.417	0.058	7.7914e-134
PTPRE	7.6696e-138	0.357648	0.375	0.043	1.22898e-133
SKIV2L2	8.04746e-138	0.345356	0.385	0.046	1.28952e-133
HNRNPL	9.30468e-138	0.413976	0.463	0.079	1.49098e-133
CD99	1.01633e-137	0.397432	0.451	0.074	1.62856e-133
CIAO1	1.15212e-137	0.350979	0.364	0.039	1.84616e-133
CRTAM	1.54233e-137	0.474192	0.365	0.041	2.47143e-133
APOBEC3C	1.81243e-137	0.354951	0.365	0.039	2.90424e-133
CTNNBL1	2.16934e-137	0.342525	0.392	0.049	3.47615e-133
CRLS1	2.91863e-137	0.29558	0.311	0.022	4.67682e-133
ME2	3.23126e-137	0.287092	0.312	0.023	5.17777e-133
PPT1	3.31909e-137	0.371795	0.433	0.065	5.31852e-133
AP3S1	3.93379e-137	0.320285	0.382	0.045	6.3035e-133
GTF2H2C	4.51216e-137	0.297865	0.298	0.019	7.23029e-133
TMEM106C	5.25692e-137	0.30894	0.317	0.024	8.4237e-133
STARD7	5.32385e-137	0.321625	0.375	0.043	8.53093e-133
CD3E	6.5544e-137	0.495291	0.729	0.266	1.05028e-132
QDPR	7.24675e-137	0.297262	0.317	0.024	1.16122e-132
ANKRD39	1.4067e-136	0.295442	0.331	0.028	2.25409e-132
NUP62	1.43085e-136	0.308886	0.344	0.032	2.2928e-132
ARPP19	1.56884e-136	0.35842	0.398	0.052	2.51391e-132
MED30	2.0523e-136	0.344758	0.392	0.049	3.2886e-132
2020-09-02	2.42284e-136	0.366821	0.421	0.061	3.88236e-132
PRKAR1B	3.6231e-136	0.296754	0.319	0.025	5.80566e-132
TARDBP	3.88249e-136	0.320916	0.372	0.042	6.2213e-132
CCDC12	4.45582e-136	0.403351	0.527	0.111	7.14e-132
HMGN3	4.55825e-136	0.43352	0.544	0.122	7.30414e-132
TRAPPC5	5.18835e-136	0.37708	0.415	0.059	8.3138e-132
ANAPC5	5.31544e-136	0.406466	0.451	0.075	8.51747e-132
MAP1LC3B	5.71663e-136	0.355445	0.448	0.072	9.16033e-132
PTCH2	5.92036e-136	0.250353	0.231	0.004	9.48678e-132
TBL3	7.03721e-136	0.308147	0.337	0.031	1.12764e-131
DARS	8.4785e-136	0.396946	0.455	0.076	1.35859e-131
NOP2	1.22239e-135	0.312025	0.339	0.031	1.95875e-131
ISY1	1.52839e-135	0.345405	0.349	0.035	2.44908e-131
PHAX	1.59178e-135	0.338252	0.392	0.05	2.55067e-131
DDX49	1.62687e-135	0.283753	0.316	0.024	2.60689e-131
GZMM	1.6769e-135	0.458128	0.59	0.152	2.68707e-131
DDX52	2.20007e-135	0.324592	0.35	0.035	3.52539e-131
UBAP2	2.30701e-135	0.285924	0.304	0.021	3.69675e-131
SLC29A1	2.31814e-135	0.273685	0.284	0.016	3.71459e-131
FAM204A	2.50533e-135	0.355444	0.43	0.065	4.01454e-131
CYB5B	2.61999e-135	0.339957	0.388	0.049	4.19827e-131
HMGB2	3.30309e-135	0.491176	0.488	0.095	5.29288e-131
ZDHHC12	3.66374e-135	0.342877	0.374	0.043	5.87078e-131
MT-ATP8	4.08008e-135	0.426245	0.522	0.11	6.53792e-131
MRPL38	7.63487e-135	0.291592	0.322	0.027	1.22341e-130
THOC3	7.66062e-135	0.337885	0.374	0.043	1.22754e-130
PPP1R7	9.04898e-135	0.389566	0.456	0.078	1.45001e-130
HIF1A	1.24042e-134	0.369155	0.421	0.062	1.98766e-130
FTSJ2	1.31653e-134	0.309618	0.327	0.028	2.1096e-130
NEAT1	1.72602e-134	0.512785	0.75	0.288	2.76577e-130
GNL1	1.93243e-134	0.291294	0.317	0.026	3.09652e-130
TMEM243	2.73872e-134	0.41302	0.481	0.091	4.38853e-130
NOL8	3.36755e-134	0.316917	0.347	0.035	5.39615e-130
AGFG1	4.0899e-134	0.279016	0.289	0.018	6.55366e-130
FH	4.11251e-134	0.286109	0.312	0.024	6.58988e-130
RRP36	4.62238e-134	0.271409	0.289	0.018	7.4069e-130
WDR75	6.3811e-134	0.295658	0.309	0.023	1.02251e-129
CAPNS1	8.7558e-134	0.366747	0.433	0.067	1.40303e-129
G3BP2	9.05338e-134	0.392335	0.455	0.078	1.45071e-129
BRD9	1.94206e-133	0.338861	0.392	0.051	3.11196e-129
SCP2	2.31097e-133	0.344471	0.417	0.06	3.7031e-129
RP11-138A9.2	2.50988e-133	0.385836	0.415	0.06	4.02183e-129
LRPPRC	2.52946e-133	0.297365	0.332	0.03	4.0532e-129
DDX10	3.45645e-133	0.302299	0.309	0.024	5.53861e-129
CINP	3.64842e-133	0.297865	0.324	0.028	5.84622e-129
RAP1B	3.6998e-133	0.421114	0.521	0.113	5.92856e-129
FAM98A	3.91597e-133	0.272745	0.279	0.016	6.27495e-129
MTX2	4.98525e-133	0.307143	0.312	0.025	7.98837e-129
PPP2R3C	5.02801e-133	0.31893	0.331	0.03	8.05688e-129
ACAT2	5.21889e-133	0.351181	0.375	0.045	8.36274e-129
RBM38	7.50094e-133	0.322688	0.352	0.037	1.20195e-128
RNASEH1	1.38672e-132	0.274744	0.306	0.023	2.22209e-128
TMEM109	1.50875e-132	0.348386	0.359	0.04	2.41761e-128
SPTSSA	1.90673e-132	0.284196	0.296	0.02	3.05534e-128
SLC39A3	2.45761e-132	0.282456	0.289	0.019	3.93808e-128
PYCR2	2.81615e-132	0.345259	0.39	0.051	4.5126e-128
RBFA	3.07373e-132	0.260737	0.273	0.014	4.92535e-128
RAE1	3.38795e-132	0.296544	0.326	0.029	5.42885e-128
FIP1L1	3.43191e-132	0.310424	0.359	0.039	5.49929e-128
GTF2I	3.54582e-132	0.324408	0.379	0.046	5.68183e-128
CD2BP2	3.88613e-132	0.320148	0.37	0.044	6.22714e-128
PRMT5	5.23175e-132	0.311477	0.332	0.031	8.38336e-128
RPN1	6.42178e-132	0.349071	0.428	0.066	1.02903e-127
RANGRF	8.787e-132	0.346341	0.359	0.041	1.40803e-127
SF3B1	9.01808e-132	0.401222	0.501	0.101	1.44506e-127
NIPA2	1.0028e-131	0.280119	0.302	0.022	1.60689e-127
CTSC	1.24687e-131	0.35991	0.39	0.052	1.99798e-127
HMGXB4	1.25289e-131	0.294296	0.316	0.026	2.00764e-127
TMED10	1.25875e-131	0.340112	0.413	0.06	2.01701e-127
RBBP7	1.28047e-131	0.377467	0.417	0.063	2.05183e-127
GRHPR	1.3221e-131	0.315118	0.352	0.038	2.11853e-127
ZFP36L1	1.49103e-131	0.479473	0.645	0.196	2.38922e-127
RPP40	1.87591e-131	0.256608	0.273	0.015	3.00596e-127
MTIF2	1.99337e-131	0.278914	0.279	0.016	3.19418e-127
CAST	2.0634e-131	0.350756	0.426	0.066	3.3064e-127
CDK11B	2.16939e-131	0.339116	0.362	0.042	3.47623e-127
PSENEN	2.22293e-131	0.335441	0.402	0.056	3.56203e-127
CWC27	3.65065e-131	0.301362	0.326	0.029	5.84981e-127
CCDC47	4.97494e-131	0.331143	0.345	0.036	7.97184e-127
PRPS2	5.2411e-131	0.266963	0.278	0.016	8.39834e-127
MCMBP	7.82746e-131	0.296487	0.314	0.026	1.25427e-126
EXOC3	8.84205e-131	0.290427	0.288	0.019	1.41685e-126
CD3G	9.48648e-131	0.51763	0.651	0.212	1.52011e-126
LONP1	1.33258e-130	0.27886	0.288	0.019	2.13533e-126
NGDN	1.55761e-130	0.38327	0.417	0.064	2.49592e-126
HAT1	2.22684e-130	0.313112	0.347	0.037	3.56829e-126
U2AF2	2.31413e-130	0.319805	0.359	0.041	3.70816e-126
NR2C2AP	2.88992e-130	0.260818	0.288	0.019	4.63081e-126
PLRG1	2.89172e-130	0.275549	0.322	0.029	4.63369e-126
SMAP2	2.97421e-130	0.416404	0.529	0.119	4.76587e-126
RTCB	3.62055e-130	0.343596	0.387	0.052	5.80156e-126
FBXO6	7.09338e-130	0.277732	0.281	0.017	1.13664e-125
PRPS1	7.49249e-130	0.336842	0.367	0.044	1.2006e-125
RBM19	8.25096e-130	0.296664	0.312	0.026	1.32213e-125
EMC3	9.89512e-130	0.312067	0.357	0.041	1.58559e-125
PFDN1	1.09351e-129	0.370256	0.443	0.075	1.75225e-125
COMTD1	1.23039e-129	0.259195	0.263	0.013	1.97158e-125
MPV17L2	1.52578e-129	0.264028	0.271	0.015	2.4449e-125
THYN1	1.54043e-129	0.387936	0.481	0.093	2.46839e-125
SYAP1	2.14358e-129	0.322599	0.365	0.044	3.43488e-125
EMD	3.11616e-129	0.358959	0.39	0.053	4.99334e-125
CD6	3.32914e-129	0.347941	0.417	0.063	5.33462e-125
PEF1	4.26912e-129	0.31664	0.329	0.032	6.84084e-125
HUWE1	4.8415e-129	0.350621	0.412	0.062	7.75802e-125
CNIH1	7.24799e-129	0.277477	0.317	0.028	1.16142e-124
IARS	8.24842e-129	0.334286	0.364	0.044	1.32173e-124
G6PD	8.7408e-129	0.291743	0.319	0.029	1.40063e-124
ADAR	1.14892e-128	0.402574	0.54	0.126	1.84103e-124
SDF4	1.19955e-128	0.332108	0.367	0.045	1.92215e-124
KIAA1430	1.30429e-128	0.360552	0.388	0.053	2.09e-124
UBAP2L	1.96837e-128	0.284415	0.336	0.034	3.15411e-124
[truncated: 534 more rows]

## Sheet: CD8T_Mem_AntiCD3
	p_val	avg_logFC	pct.1	pct.2	p_val_adj
CITE-CD69-GTCTCTTGGCTTAAA	0	2.49274	1	0.995	0
GZMB	6.67449e-287	2.82947	0.965	0.538	1.06952e-282
LAG3	2.76999e-280	0.997723	0.768	0.073	4.43863e-276
CCL3	4.68982e-270	2.88511	0.889	0.259	7.51497e-266
HSP90AB1	2.40081e-264	1.28571	0.956	0.455	3.84705e-260
IL2RA	8.36172e-259	1.091	0.767	0.104	1.33988e-254
MIF	4.42902e-251	1.18729	0.936	0.448	7.09706e-247
CITE-CD25-TTTGTCCTGTACGCC	1.63698e-250	1.90935	0.999	0.989	2.6231e-246
GAPDH	7.89855e-237	1.26783	0.954	0.616	1.26566e-232
NME1	5.91066e-236	0.975549	0.733	0.104	9.47124e-232
DDX21	1.09169e-233	0.877354	0.734	0.106	1.74933e-229
TMSB10	1.15546e-233	0.926123	0.988	0.918	1.8515e-229
CCL4	2.54836e-233	2.93935	0.869	0.339	4.0835e-229
CITE-CD278-ICOS-CGCGCACCCATTAAA	1.69015e-231	0.970656	1	1	2.70829e-227
PSME2	1.10739e-229	0.963383	0.868	0.312	1.77449e-225
ACTB	1.10205e-227	0.92692	0.996	0.941	1.76593e-223
ENO1	4.78194e-227	1.11141	0.91	0.422	7.66257e-223
NME1-NME2	8.72594e-225	0.938524	0.76	0.153	1.39824e-220
SEC61B	1.42653e-216	0.976509	0.813	0.24	2.28587e-212
PTMA	2.42524e-216	1.00813	0.997	0.955	3.88621e-212
HSP90AA1	6.00357e-214	1.05461	0.881	0.35	9.62012e-210
RPLP0	1.97789e-209	0.964938	0.975	0.782	3.16938e-205
RPS2	4.27708e-209	0.853964	0.997	0.98	6.85359e-205
RBM8A	5.85255e-209	0.921753	0.802	0.22	9.37813e-205
B2M	3.87764e-208	0.597979	0.999	1	6.21353e-204
NKG7	3.9016e-208	1.1383	0.917	0.472	6.25192e-204
RPL37A	1.86373e-206	0.92022	0.992	0.935	2.98645e-202
EIF4A1	1.1678e-205	1.04983	0.883	0.398	1.87128e-201
SEC61G	2.28414e-205	1.01258	0.794	0.238	3.66011e-201
PKM	9.73909e-205	0.872435	0.821	0.261	1.56059e-200
FABP5	1.39583e-204	1.14903	0.723	0.145	2.23667e-200
HSPE1	2.01148e-204	1.14119	0.824	0.282	3.2232e-200
TUBA1B	2.44236e-202	1.04162	0.853	0.333	3.91363e-198
RAN	3.47845e-202	1.05443	0.843	0.318	5.57387e-198
POMP	1.53777e-201	0.868197	0.79	0.226	2.46412e-197
RPS24	1.00907e-200	0.912417	0.981	0.827	1.61693e-196
SNRPG	6.91762e-200	0.945666	0.808	0.259	1.10848e-195
POLR2L	1.30966e-199	0.849326	0.806	0.258	2.0986e-195
AC017002.1	8.57835e-199	0.775007	0.593	0.052	1.3746e-194
TXN	3.35768e-198	1.01039	0.82	0.284	5.38034e-194
H3F3B	5.7463e-198	0.877125	0.939	0.637	9.20787e-194
EIF5B	1.74643e-196	0.752298	0.752	0.173	2.79847e-192
NPM1	3.35686e-196	1.12667	0.925	0.586	5.37903e-192
PARK7	3.39474e-196	0.803081	0.814	0.259	5.43974e-192
SNRPE	3.50354e-194	0.870262	0.763	0.203	5.61408e-190
SDF2L1	1.72825e-193	0.765383	0.656	0.099	2.76935e-189
NCL	2.31121e-193	1.06837	0.835	0.34	3.70348e-189
SUB1	1.31909e-192	0.854387	0.813	0.281	2.11371e-188
ATP5E	2.48928e-192	0.80515	0.954	0.684	3.98883e-188
IFNG	5.1155e-192	2.5938	0.748	0.203	8.19708e-188
PSMA7	1.48953e-191	0.89901	0.813	0.286	2.38682e-187
SLIRP	6.9894e-191	0.876745	0.719	0.157	1.11998e-186
CYCS	1.15976e-190	0.904482	0.704	0.153	1.8584e-186
RPLP1	2.59924e-190	0.742208	0.997	0.995	4.16502e-186
RPSA	1.19459e-188	0.815086	0.93	0.603	1.9142e-184
RPL18A	2.08976e-188	0.738366	0.997	0.987	3.34863e-184
RPL27	4.1765e-188	0.836693	0.955	0.795	6.69242e-184
RPL12	7.05102e-188	0.686051	0.988	0.889	1.12986e-183
CHCHD2	8.60421e-188	1.01347	0.859	0.408	1.37874e-183
HOPX	9.45578e-188	0.879445	0.61	0.076	1.51519e-183
RPL15	1.61844e-187	0.823612	0.984	0.927	2.59338e-183
RPL35	1.7846e-187	0.838795	0.996	0.949	2.85965e-183
COX17	2.58083e-187	0.698988	0.723	0.164	4.13552e-183
PFN1	3.80502e-187	0.856913	0.975	0.791	6.09716e-183
TPI1	4.61794e-187	0.908145	0.853	0.355	7.39978e-183
HSPA8	9.92389e-187	0.845741	0.861	0.369	1.5902e-182
RPSAP58	1.15709e-186	0.815641	0.892	0.45	1.85413e-182
GZMH	3.82911e-186	1.01687	0.685	0.132	6.13576e-182
SERBP1	8.70589e-186	1.00831	0.767	0.237	1.39503e-181
SERF2	1.75196e-185	0.685223	0.951	0.701	2.80734e-181
RANBP1	5.64015e-185	0.844295	0.711	0.164	9.03777e-181
CALR	1.30083e-184	0.725931	0.688	0.134	2.08445e-180
RPS5	1.58351e-184	0.838334	0.967	0.829	2.53742e-180
YBX1	1.29136e-183	1.04433	0.865	0.441	2.06928e-179
RPS8	6.17291e-183	0.768386	0.993	0.934	9.89147e-179
EIF2S2	6.49999e-183	0.797418	0.742	0.196	1.04156e-178
PSMB3	1.3584e-181	0.79355	0.757	0.234	2.1767e-177
NHP2	4.17996e-181	0.723814	0.659	0.121	6.69796e-177
RPS6	6.21938e-181	0.751025	0.996	0.976	9.96593e-177
RPL28	8.82131e-181	0.739387	0.99	0.945	1.41353e-176
UQCRQ	1.12832e-179	0.880691	0.799	0.3	1.80802e-175
HNRNPA1	1.80341e-179	0.869266	0.9	0.524	2.88979e-175
PGAM1	2.30764e-179	0.803001	0.688	0.149	3.69776e-175
RPS9	5.06576e-178	0.732149	0.985	0.911	8.11737e-174
EIF1	6.08059e-178	0.825203	0.945	0.75	9.74354e-174
HSPD1	1.25909e-177	0.899102	0.712	0.177	2.01756e-173
LDHA	3.16197e-176	0.886998	0.827	0.334	5.06675e-172
RPL10A	5.13471e-175	0.734414	0.973	0.788	8.22787e-171
EIF5A	6.77615e-175	0.912034	0.714	0.182	1.08581e-170
UBB	9.9458e-174	0.773775	0.88	0.477	1.59371e-169
COX6A1	3.74381e-173	0.753644	0.779	0.262	5.99908e-169
RPL5	6.39419e-173	0.881999	0.924	0.656	1.02461e-168
LTA	1.19221e-172	0.961806	0.662	0.143	1.91039e-168
SEC11C	1.54901e-172	0.634517	0.634	0.11	2.48213e-168
RPL10	2.17857e-172	0.618374	1	0.996	3.49094e-168
NDUFB2	2.94839e-171	0.687363	0.741	0.215	4.72449e-167
PTMS	9.40645e-171	0.620533	0.487	0.027	1.50729e-166
SNRPD1	2.22522e-170	0.838967	0.692	0.172	3.56569e-166
RPL8	3.61085e-170	0.750496	0.98	0.876	5.78603e-166
C19orf10	1.14585e-169	0.705819	0.63	0.113	1.83611e-165
MANF	2.96288e-169	0.748258	0.644	0.126	4.74772e-165
PRDX1	3.13989e-169	0.837445	0.703	0.185	5.03137e-165
PA2G4	3.14841e-169	0.896601	0.722	0.21	5.04502e-165
HLA-A	9.50953e-169	0.619652	0.981	0.886	1.52381e-164
SNRPF	3.42599e-168	0.781061	0.697	0.185	5.48981e-164
RPL29	5.09694e-168	0.785247	0.975	0.853	8.16733e-164
EEF1A1	7.27299e-168	0.644393	0.995	0.963	1.16542e-163
RPS26	9.93767e-168	0.913065	0.973	0.768	1.59241e-163
APRT	1.19499e-167	0.754186	0.805	0.314	1.91485e-163
RPS16	1.40268e-167	0.775089	0.974	0.9	2.24765e-163
ACTG1	7.18546e-167	0.884976	0.874	0.478	1.1514e-162
NDUFA13	9.97637e-167	0.684846	0.804	0.308	1.59861e-162
PSME1	1.21013e-166	0.726928	0.858	0.435	1.93911e-162
RPL6	1.47506e-166	0.804838	0.958	0.848	2.36364e-162
RPS15	4.78587e-166	0.651895	0.993	0.984	7.66887e-162
SRSF3	1.0723e-165	0.709865	0.694	0.172	1.71825e-161
EIF5AL1	2.32141e-165	0.698754	0.546	0.062	3.71983e-161
C1QBP	2.32933e-164	0.838592	0.707	0.204	3.73253e-160
PPIB	2.55059e-164	0.77615	0.753	0.257	4.08706e-160
SNRPB	6.79896e-164	0.748966	0.69	0.18	1.08947e-159
TMA7	2.18219e-163	0.726168	0.935	0.729	3.49673e-159
SSBP1	9.41472e-163	0.747058	0.677	0.167	1.50861e-158
MYL6	1.06913e-162	0.686444	0.939	0.668	1.71317e-158
EIF3J	2.4719e-162	0.716088	0.633	0.128	3.96097e-158
RPL7A	4.31563e-162	0.862193	0.928	0.666	6.91537e-158
ROMO1	4.65387e-162	0.621453	0.667	0.151	7.45736e-158
TMEM258	5.38688e-162	0.753163	0.802	0.336	8.63194e-158
TOMM5	8.56949e-162	0.722977	0.63	0.125	1.37317e-157
RPL14	1.44262e-161	0.733157	0.981	0.885	2.31166e-157
RPL36A	2.77513e-161	0.753063	0.952	0.845	4.44687e-157
PPIA	3.38061e-161	0.821272	0.857	0.467	5.41709e-157
USMG5	4.19253e-161	0.785525	0.779	0.303	6.71811e-157
NACA	4.35376e-161	0.783056	0.92	0.641	6.97646e-157
SSR4	6.33674e-161	0.683964	0.794	0.312	1.0154e-156
RPS13	1.18603e-160	0.722386	0.98	0.921	1.90049e-156
PPA1	1.78109e-160	0.710265	0.622	0.121	2.85401e-156
MRPL52	2.32918e-160	0.683031	0.623	0.122	3.73228e-156
SRP14	4.50236e-160	0.759853	0.87	0.505	7.21458e-156
SHFM1	2.3204e-159	0.699212	0.709	0.204	3.71821e-155
NBEAL1	2.45374e-159	0.634008	0.941	0.712	3.93187e-155
RPS7	2.50636e-159	0.824179	0.96	0.846	4.01619e-155
GNB2L1	3.75359e-159	0.770136	0.94	0.715	6.01475e-155
RPL22	4.92338e-159	0.716095	0.925	0.623	7.88922e-155
COX6A1P2	6.20227e-159	0.649981	0.685	0.174	9.93852e-155
COX7B	7.81958e-159	0.686374	0.741	0.242	1.25301e-154
ATP5J2	2.16375e-158	0.715903	0.76	0.265	3.46719e-154
RPL23	2.58935e-158	0.869868	0.917	0.658	4.14917e-154
PSMB6	6.06059e-158	0.625688	0.664	0.156	9.71149e-154
RPS23	7.68429e-158	0.716637	0.984	0.949	1.23133e-153
SET	1.81338e-157	0.802207	0.742	0.256	2.90576e-153
COX7A2	2.22397e-157	0.789444	0.82	0.41	3.56369e-153
SRM	2.48446e-157	0.771248	0.619	0.126	3.9811e-153
RPS21	3.79012e-157	0.771093	0.96	0.856	6.0733e-153
RPL19	4.26274e-157	0.66555	0.989	0.966	6.83062e-153
ATP5J	5.26069e-157	0.712311	0.729	0.229	8.42972e-153
COX6C	2.506e-156	0.673817	0.808	0.358	4.01562e-152
HLA-B	3.86605e-156	0.596418	0.981	0.925	6.19495e-152
RPL9	6.43963e-156	0.668709	0.967	0.828	1.03189e-151
TRMT112	7.57269e-156	0.736306	0.769	0.283	1.21345e-151
NDUFS6	1.10501e-155	0.628237	0.651	0.148	1.77066e-151
CCL4L2	1.42349e-155	1.70901	0.422	0.015	2.281e-151
NDUFA4	1.97191e-155	0.714243	0.817	0.376	3.15978e-151
RPL37	2.01748e-155	0.763416	0.984	0.923	3.23281e-151
ARPC5L	2.2161e-155	0.618638	0.617	0.12	3.55108e-151
HNRNPM	2.74293e-155	0.708854	0.7	0.2	4.39527e-151
PSMB1	5.94198e-155	0.76691	0.742	0.258	9.52142e-151
MT-CO2	7.76591e-155	0.587132	0.985	0.915	1.24441e-150
RBX1	1.30947e-154	0.659679	0.72	0.228	2.0983e-150
NOP10	2.76981e-154	0.739778	0.707	0.21	4.43835e-150
RPS12	4.16048e-154	0.658879	0.989	0.978	6.66675e-150
IL32	6.25477e-154	0.828211	0.936	0.708	1.00227e-149
RPL24	7.53657e-154	0.79272	0.926	0.716	1.20766e-149
TNFRSF9	9.95918e-154	0.541838	0.428	0.018	1.59586e-149
WDR43	1.10431e-153	0.60952	0.535	0.07	1.76955e-149
FAU	2.00647e-153	0.737386	0.973	0.898	3.21516e-149
RPL18	1.87544e-152	0.699088	0.96	0.869	3.0052e-148
RPS29	2.36284e-152	0.539538	0.999	0.999	3.78621e-148
HSPA5	3.2782e-152	0.624727	0.599	0.113	5.25299e-148
NDUFV2	4.25234e-152	0.724225	0.679	0.183	6.81396e-148
PFDN2	4.657e-151	0.700025	0.618	0.135	7.46237e-147
MRPL20	6.78784e-151	0.659125	0.652	0.159	1.08768e-146
RPS18	7.2493e-151	0.676143	0.999	0.998	1.16163e-146
TUBB	8.17355e-151	0.691136	0.742	0.259	1.30973e-146
RPL32	3.73615e-150	0.591707	0.993	0.994	5.98681e-146
PSMA3	5.04641e-150	0.589775	0.608	0.12	8.08636e-146
RPL38	9.92207e-150	0.732754	0.966	0.844	1.58991e-145
PDCD5	1.2002e-149	0.616683	0.553	0.087	1.92321e-145
EEF1B2	2.57494e-149	0.690421	0.851	0.459	4.12609e-145
ATP5G3	3.82284e-149	0.760212	0.683	0.199	6.12571e-145
SRGN	1.45511e-148	0.730993	0.79	0.352	2.33166e-144
UBE2L3	1.7225e-148	0.623214	0.64	0.151	2.76013e-144
TIMM13	5.64125e-148	0.646434	0.629	0.143	9.03955e-144
PRMT1	3.17824e-147	0.641144	0.622	0.137	5.09281e-143
ATP5I	9.28705e-147	0.725681	0.82	0.422	1.48816e-142
ATP5L	2.99603e-146	0.678183	0.884	0.563	4.80084e-142
RPL36AL	3.01697e-146	0.678187	0.914	0.692	4.83439e-142
RPL17	4.105e-146	0.794109	0.959	0.846	6.57785e-142
RPLP2	4.7268e-146	0.573767	0.995	0.987	7.57423e-142
NHP2L1	5.46988e-146	0.724329	0.685	0.202	8.76494e-142
CD3D	7.6153e-146	0.64393	0.899	0.595	1.22028e-141
TCEB2	1.40331e-145	0.666694	0.832	0.43	2.24866e-141
PDIA6	2.08041e-145	0.599391	0.559	0.095	3.33366e-141
HSP90B1	2.43874e-144	0.599394	0.671	0.182	3.90784e-140
FKBP11	4.67062e-144	0.671479	0.593	0.12	7.4842e-140
GNG5	4.80602e-144	0.600409	0.632	0.151	7.70117e-140
PSMB2	6.31772e-144	0.560199	0.559	0.095	1.01235e-139
NDUFAB1	7.60883e-144	0.661066	0.607	0.134	1.21924e-139
ZBED2	9.07284e-144	0.600134	0.45	0.037	1.45383e-139
DDX39A	1.20746e-143	0.555564	0.553	0.091	1.93483e-139
SNRPD2	2.16245e-143	0.698475	0.831	0.453	3.46511e-139
CCT6A	3.05752e-143	0.606363	0.561	0.098	4.89937e-139
COX5A	3.06262e-143	0.675127	0.643	0.169	4.90754e-139
LSM7	3.42408e-143	0.642347	0.663	0.182	5.48674e-139
RPL36	3.48285e-143	0.677268	0.993	0.973	5.58092e-139
RPS10	4.54455e-143	0.710517	0.932	0.732	7.28219e-139
UBL5	4.80203e-143	0.635782	0.795	0.361	7.69477e-139
PRELID1	1.23454e-142	0.686448	0.659	0.184	1.97822e-138
LINC00152	2.12462e-142	0.671341	0.584	0.114	3.40449e-138
GADD45GIP1	2.17008e-142	0.592794	0.626	0.146	3.47733e-138
RPS25	2.9101e-142	0.603696	0.982	0.962	4.66314e-138
ALDOA	3.59938e-142	0.814998	0.795	0.385	5.76765e-138
CFL1	4.64491e-142	0.699086	0.887	0.566	7.44301e-138
SELK	6.27577e-142	0.640576	0.653	0.178	1.00563e-137
GSTP1	9.40366e-142	0.716183	0.69	0.222	1.50684e-137
UBA52	1.00789e-141	0.672172	0.955	0.822	1.61504e-137
RBM3	1.84241e-141	0.58961	0.651	0.169	2.95228e-137
PSMB8	2.03335e-141	0.630757	0.693	0.217	3.25824e-137
CLIC1	2.70225e-141	0.625678	0.719	0.248	4.33009e-137
RPS27A	1.09494e-140	0.564025	0.989	0.986	1.75454e-136
HNRNPDL	1.95951e-140	0.594364	0.723	0.25	3.13992e-136
METAP2	2.09026e-140	0.614285	0.591	0.126	3.34944e-136
MIR155HG	5.22228e-140	0.716845	0.551	0.098	8.36817e-136
PSMA1	7.07632e-140	0.58386	0.581	0.119	1.13391e-135
COX6B1	1.59057e-139	0.660755	0.808	0.385	2.54873e-135
PSMA5	2.35511e-139	0.574523	0.617	0.144	3.77382e-135
RPL7	3.45097e-139	0.667937	0.978	0.954	5.52983e-135
SSSCA1	4.50002e-139	0.506341	0.488	0.059	7.21083e-135
PSMA4	2.1227e-138	0.523391	0.58	0.115	3.40142e-134
SRSF7	4.07152e-138	0.606446	0.66	0.187	6.52421e-134
FKBP2	5.29418e-138	0.51994	0.588	0.12	8.48339e-134
RPL41	5.63511e-138	0.60491	1	1	9.0297e-134
HNRNPAB	6.3363e-138	0.627799	0.55	0.1	1.01533e-133
RPL26	6.71023e-138	0.67909	0.984	0.96	1.07525e-133
RPL4	2.19058e-137	0.686227	0.894	0.61	3.51019e-133
ID2	5.4165e-137	0.609368	0.538	0.093	8.6794e-133
RPL22L1	5.85533e-137	0.612249	0.555	0.104	9.38258e-133
ATP5G1	6.70734e-137	0.611595	0.581	0.125	1.07478e-132
CITE-CD38-ATCCTTTGCCGTGTT	7.23615e-137	0.823023	0.999	0.998	1.15952e-132
TCEB1	1.29294e-136	0.599103	0.576	0.12	2.0718e-132
RPL39	2.67025e-136	0.612396	0.971	0.962	4.27881e-132
RPS11	6.96355e-136	0.721358	0.933	0.739	1.11584e-131
CMSS1	1.41287e-135	0.518668	0.457	0.048	2.26399e-131
MINOS1	1.75722e-135	0.602689	0.638	0.171	2.81576e-131
MRPL12	8.41583e-135	0.535753	0.446	0.043	1.34855e-130
SLC25A5	2.22704e-134	0.734888	0.656	0.203	3.56861e-130
HINT1	6.92918e-134	0.676583	0.834	0.461	1.11033e-129
MRPL23	7.80172e-134	0.571201	0.559	0.112	1.25015e-129
SNRPB2	9.02196e-134	0.544125	0.576	0.122	1.44568e-129
PHB	9.74635e-134	0.605688	0.547	0.105	1.56176e-129
PSMD8	1.26543e-133	0.588112	0.595	0.138	2.02772e-129
RPS19	1.40375e-133	0.516784	1	1	2.24937e-129
DNAJA1	1.44099e-133	0.579922	0.569	0.116	2.30904e-129
RPL11	2.47727e-133	0.579292	0.989	0.97	3.96958e-129
BATF3	2.9943e-133	0.478592	0.381	0.016	4.79807e-129
OSTC	4.4354e-133	0.525599	0.533	0.093	7.10729e-129
PSMC3	6.07657e-133	0.538334	0.553	0.106	9.7371e-129
UBE2D3	6.84545e-133	0.574738	0.649	0.187	1.09691e-128
MRPL33	1.78213e-132	0.547351	0.598	0.138	2.85568e-128
HLA-C	1.95368e-132	0.540009	0.966	0.878	3.13057e-128
TMED9	2.43296e-132	0.52463	0.546	0.101	3.89858e-128
ATP6V0B	6.86145e-132	0.592607	0.57	0.121	1.09948e-127
ATP1B3	1.10185e-131	0.484303	0.453	0.049	1.76561e-127
BTF3	1.3824e-131	0.701613	0.872	0.58	2.21516e-127
OAZ1	1.78998e-131	0.693172	0.877	0.596	2.86826e-127
BOLA2B	2.45638e-131	0.44074	0.43	0.038	3.93611e-127
C19orf53	5.47714e-131	0.573986	0.668	0.214	8.77657e-127
SPCS2	3.67419e-130	0.558771	0.643	0.184	5.88752e-126
RPL27A	6.99026e-130	0.589798	0.982	0.984	1.12012e-125
TIMM8B	8.77884e-130	0.537908	0.516	0.087	1.40672e-125
LAMTOR5	1.41349e-129	0.555755	0.611	0.158	2.26498e-125
TXNDC17	2.27533e-129	0.569469	0.518	0.09	3.64599e-125
PSMD14	2.58518e-129	0.504557	0.465	0.059	4.14248e-125
ZNF593	4.04386e-129	0.439973	0.437	0.044	6.47989e-125
RPL35A	6.22033e-129	0.61472	0.98	0.97	9.96745e-125
RPS20	1.99284e-128	0.627394	0.962	0.889	3.19333e-124
PSMB7	7.77872e-128	0.555171	0.55	0.113	1.24646e-123
YWHAB	1.12567e-127	0.532185	0.675	0.22	1.80377e-123
RBPJ	1.28014e-127	0.555088	0.495	0.077	2.05129e-123
CCND2	1.7352e-127	0.520095	0.495	0.077	2.78048e-123
MT-ND5	3.98143e-127	0.630644	0.797	0.419	6.37985e-123
LSM5	6.88446e-127	0.523484	0.558	0.12	1.10317e-122
BATF	8.55801e-127	0.489014	0.477	0.067	1.37134e-122
CCT3	9.98278e-127	0.507078	0.518	0.092	1.59964e-122
DBI	3.4066e-126	0.597198	0.649	0.206	5.45874e-122
SRSF9	4.18667e-126	0.619581	0.629	0.185	6.70872e-122
ATP5D	4.75656e-126	0.613262	0.701	0.254	7.62191e-122
RPL13	4.77579e-126	0.508414	0.997	0.998	7.65272e-122
ERH	5.3861e-126	0.66452	0.651	0.215	8.63069e-122
U2AF1	6.49807e-126	0.571715	0.613	0.167	1.04125e-121
NOP56	6.73757e-126	0.533505	0.492	0.079	1.07963e-121
UQCRH	7.56806e-126	0.614652	0.662	0.225	1.21271e-121
CCT2	8.44838e-126	0.536574	0.48	0.072	1.35377e-121
TOMM22	1.91061e-125	0.531033	0.527	0.099	3.06156e-121
CALM2	2.25565e-125	0.626693	0.767	0.35	3.61445e-121
MRTO4	5.40155e-125	0.447404	0.417	0.039	8.65545e-121
CD63	3.33134e-124	0.529068	0.626	0.175	5.33814e-120
HMGN1	3.41946e-124	0.562722	0.63	0.189	5.47934e-120
ILF2	1.30089e-123	0.498478	0.516	0.096	2.08454e-119
SNRPA1	1.89282e-123	0.502032	0.498	0.085	3.03306e-119
CBX3	4.54941e-123	0.647216	0.651	0.216	7.28998e-119
ZNF706	5.75657e-123	0.529218	0.572	0.134	9.22433e-119
MRPS12	1.1268e-122	0.443557	0.48	0.072	1.80558e-118
NDUFC2	1.47732e-122	0.541491	0.591	0.155	2.36725e-118
MRPL51	1.93124e-122	0.511233	0.569	0.133	3.09462e-118
PSMB9	2.07439e-122	0.597484	0.759	0.364	3.32401e-118
GBP2	2.81948e-122	0.458155	0.536	0.109	4.51793e-118
HNRNPA2B1	2.88667e-122	0.615347	0.715	0.285	4.6256e-118
ENY2	2.92777e-122	0.502062	0.558	0.124	4.69145e-118
COX7C	3.13307e-122	0.67274	0.874	0.592	5.02043e-118
RPS4X	1.24918e-121	0.538322	0.989	0.957	2.00169e-117
COX8A	2.251e-121	0.538035	0.649	0.201	3.60701e-117
EIF3I	3.21722e-121	0.498762	0.523	0.104	5.15527e-117
HNRNPC	5.06145e-121	0.589766	0.662	0.225	8.11047e-117
NOL7	5.99984e-121	0.492128	0.536	0.108	9.61415e-117
ATP5G2	6.34233e-121	0.633768	0.787	0.411	1.01629e-116
MT-ND4	6.49698e-121	0.521036	0.936	0.767	1.04108e-116
STIP1	7.06981e-121	0.437463	0.435	0.052	1.13287e-116
CCT4	7.08057e-121	0.500072	0.501	0.089	1.13459e-116
TBCA	8.16079e-121	0.582577	0.692	0.26	1.30769e-116
FTL	1.10148e-120	0.682217	0.969	0.908	1.765e-116
MAGOH	1.2869e-120	0.539826	0.566	0.138	2.06213e-116
EIF6	1.63476e-120	0.482989	0.531	0.107	2.61955e-116
PDIA3	1.77132e-120	0.549419	0.596	0.159	2.83836e-116
ARPC2	8.6696e-120	0.596915	0.79	0.397	1.38922e-115
SLC25A3	8.83822e-120	0.510224	0.593	0.157	1.41624e-115
VDAC1	9.28253e-120	0.494253	0.499	0.089	1.48743e-115
DAD1	1.0401e-119	0.592094	0.647	0.215	1.66665e-115
C19orf70	1.5814e-119	0.511432	0.565	0.137	2.53403e-115
RPS3A	1.71549e-119	0.619499	0.966	0.914	2.7489e-115
FAM96B	2.43175e-119	0.540378	0.572	0.145	3.89664e-115
CCT8	3.27023e-119	0.499433	0.506	0.095	5.24021e-115
SF3B5	7.25391e-119	0.585697	0.613	0.183	1.16237e-114
BOLA3	1.54383e-118	0.43993	0.441	0.057	2.47383e-114
SNRPC	2.54895e-118	0.439415	0.483	0.079	4.08444e-114
SRI	3.45649e-118	0.541311	0.551	0.129	5.53869e-114
MTDH	3.60346e-118	0.540502	0.563	0.137	5.77419e-114
RPL13A	5.24128e-118	0.584571	0.997	0.998	8.39863e-114
CCT7	8.60218e-118	0.483794	0.484	0.084	1.37841e-113
NDUFA1	9.19869e-118	0.550661	0.733	0.321	1.474e-113
AURKAIP1	1.80604e-117	0.550078	0.558	0.136	2.894e-113
DCTPP1	2.45153e-117	0.475885	0.454	0.067	3.92834e-113
EEF1E1	2.68829e-117	0.45136	0.452	0.065	4.30771e-113
NDUFS5	3.72471e-117	0.592991	0.737	0.328	5.96847e-113
SUMO2	8.6655e-117	0.579229	0.694	0.271	1.38856e-112
BZW1	1.00324e-116	0.484886	0.497	0.092	1.60758e-112
SPCS3	1.79801e-116	0.431408	0.431	0.054	2.88113e-112
JTB	5.31788e-116	0.533247	0.602	0.171	8.52137e-112
PTGES3	7.24306e-116	0.500313	0.506	0.1	1.16063e-111
TPM3	1.03686e-115	0.610271	0.674	0.254	1.66146e-111
SLC25A6	1.48485e-115	0.6479	0.771	0.384	2.37932e-111
C14orf2	2.64623e-115	0.586597	0.719	0.313	4.24031e-111
TUFM	4.58041e-115	0.555139	0.509	0.104	7.33965e-111
ARPC3	5.31853e-115	0.564913	0.744	0.353	8.52242e-111
XRCC5	6.77601e-115	0.549217	0.573	0.152	1.08579e-110
NPM3	6.84604e-115	0.470373	0.404	0.044	1.09701e-110
FKBP1A	6.98576e-115	0.480124	0.469	0.079	1.1194e-110
CD2	7.14345e-115	0.588734	0.703	0.284	1.14467e-110
PSMC1	2.30618e-114	0.457636	0.472	0.079	3.69542e-110
NDUFB7	5.57641e-114	0.50283	0.598	0.173	8.93563e-110
HNRNPA3	1.0509e-113	0.487751	0.565	0.143	1.68395e-109
CCT5	1.82862e-113	0.48454	0.476	0.084	2.93018e-109
YWHAQ	7.09305e-113	0.505675	0.528	0.121	1.13659e-108
C9orf16	8.2345e-113	0.466792	0.591	0.163	1.3195e-108
COX20	1.10606e-112	0.41517	0.437	0.061	1.77236e-108
SAP18	1.23146e-112	0.548402	0.667	0.247	1.97329e-108
MRPL41	1.48816e-112	0.521462	0.577	0.159	2.38463e-108
OST4	1.91437e-112	0.581454	0.828	0.519	3.06758e-108
SRSF2	3.74039e-112	0.512343	0.535	0.126	5.9936e-108
TIMM10	4.02827e-112	0.447717	0.431	0.06	6.4549e-108
DDX18	4.2339e-112	0.544441	0.619	0.201	6.7844e-108
UBE2N	5.17416e-112	0.442332	0.472	0.082	8.29108e-108
ATP5B	6.7667e-112	0.569422	0.637	0.221	1.0843e-107
XCL2	2.4469e-111	1.13041	0.34	0.021	3.92092e-107
EBNA1BP2	3.20975e-111	0.460065	0.426	0.059	5.14331e-107
KRTCAP2	3.55832e-111	0.512431	0.655	0.233	5.70185e-107
TMA16	4.191e-111	0.399394	0.372	0.033	6.71566e-107
NDUFA11	5.00965e-111	0.518598	0.592	0.176	8.02747e-107
NEDD8	6.63476e-111	0.556033	0.66	0.252	1.06315e-106
EIF1AX	1.36412e-110	0.472714	0.471	0.085	2.18587e-106
HMGB1	1.54722e-110	0.641327	0.794	0.453	2.47927e-106
LSM6	1.78257e-110	0.428557	0.499	0.101	2.8564e-106
DKC1	2.15906e-110	0.4487	0.445	0.07	3.45967e-106
GNL3	2.78908e-110	0.440195	0.43	0.061	4.46922e-106
HYPK	2.95624e-110	0.345873	0.352	0.025	4.73707e-106
C4orf48	4.30034e-110	0.495419	0.517	0.115	6.89087e-106
EEF2	4.46374e-110	0.649386	0.735	0.347	7.15269e-106
MRPL14	5.409e-110	0.443092	0.457	0.077	8.66739e-106
C11orf31	1.41361e-109	0.490673	0.577	0.16	2.26518e-105
LMAN1	1.84504e-109	0.446894	0.439	0.068	2.9565e-105
SF3B14	2.10829e-109	0.516293	0.565	0.154	3.37833e-105
BANF1	2.93347e-109	0.437527	0.498	0.103	4.7006e-105
RPL23A	3.26624e-109	0.47975	0.985	0.994	5.23382e-105
RPS3	3.79524e-109	0.576694	0.993	0.985	6.0815e-105
C8orf33	5.31971e-109	0.41936	0.423	0.06	8.52431e-105
SSR2	5.39758e-109	0.500228	0.632	0.207	8.64909e-105
RPS28	5.42836e-109	0.54269	0.99	0.987	8.6984e-105
LSM3	6.46996e-109	0.485825	0.532	0.129	1.03675e-104
NFKBIA	6.50314e-109	0.58058	0.565	0.156	1.04206e-104
COPE	1.23054e-108	0.479665	0.598	0.179	1.97182e-104
CALM1	1.26605e-108	0.597613	0.741	0.363	2.02873e-104
CCDC167	1.86423e-108	0.420234	0.426	0.061	2.98724e-104
EIF3K	2.70153e-108	0.525472	0.69	0.289	4.32893e-104
GRPEL1	3.53505e-108	0.432656	0.426	0.061	5.66456e-104
PSMB5	4.19465e-108	0.469886	0.445	0.073	6.72151e-104
CD48	4.25674e-108	0.595565	0.563	0.164	6.821e-104
DYNLL1	6.27541e-108	0.595798	0.617	0.208	1.00557e-103
TARS	6.63161e-108	0.402858	0.396	0.047	1.06265e-103
MT-ND4L	1.11747e-107	0.481341	0.719	0.3	1.79064e-103
TOMM40	1.40251e-107	0.410684	0.39	0.045	2.24738e-103
ANP32B	3.91235e-107	0.496603	0.539	0.138	6.26915e-103
GTF3C6	4.57599e-107	0.477019	0.479	0.095	7.33256e-103
MT1X	7.92407e-107	0.521851	0.497	0.109	1.26975e-102
TOP1	1.88543e-106	0.360927	0.374	0.037	3.02122e-102
RPL21	2.3437e-106	0.440291	0.996	0.998	3.75555e-102
EDF1	3.60486e-106	0.506127	0.709	0.311	5.77643e-102
MRPS18C	7.07034e-106	0.473179	0.479	0.098	1.13295e-101
COX5B	9.24611e-106	0.540599	0.701	0.307	1.4816e-101
RGS16	9.25227e-106	0.455246	0.325	0.019	1.48258e-101
NDUFA6	1.05532e-105	0.475457	0.536	0.137	1.69105e-101
SNRPD3	1.81402e-105	0.461037	0.503	0.114	2.90678e-101
UBE2S	2.05625e-105	0.402646	0.387	0.046	3.29494e-101
PFDN6	2.16479e-105	0.4404	0.446	0.077	3.46886e-101
NDUFB11	2.92494e-105	0.47439	0.611	0.2	4.68693e-101
GSTO1	2.94249e-105	0.489003	0.492	0.107	4.71504e-101
TAP1	1.53137e-104	0.427763	0.488	0.103	2.45387e-100
HSD17B10	1.83638e-104	0.411858	0.456	0.082	2.94261e-100
RPS15A	1.84474e-104	0.473955	0.982	0.988	2.95602e-100
MAGOHB	2.01405e-104	0.386564	0.386	0.046	3.22731e-100
MT-ND1	2.14655e-104	0.570211	0.885	0.653	3.43963e-100
NDUFB9	2.20287e-104	0.515411	0.589	0.183	3.52988e-100
SOD1	3.14176e-104	0.529631	0.678	0.285	5.03436e-100
RSL1D1	3.32342e-104	0.500386	0.538	0.142	5.32544e-100
NDUFB4	3.9702e-104	0.459146	0.574	0.169	6.36185e-100
C17orf89	7.15915e-104	0.481402	0.445	0.08	1.14718e-99
TMEM208	8.52847e-104	0.378829	0.423	0.065	1.3666e-99
NAA10	1.21318e-103	0.427256	0.452	0.082	1.944e-99
VIMP	1.2726e-103	0.467609	0.477	0.099	2.03921e-99
NUDC	1.28506e-103	0.533881	0.497	0.114	2.05918e-99
MZT2B	1.83654e-103	0.508601	0.658	0.258	2.94287e-99
ABCF1	3.05134e-103	0.445845	0.497	0.112	4.88947e-99
PNO1	5.65809e-103	0.340101	0.312	0.016	9.06652e-99
PSMD7	8.41375e-103	0.434817	0.465	0.092	1.34822e-98
HNRNPU	9.51252e-103	0.467442	0.542	0.145	1.52429e-98
MIR4435-1HG	9.60553e-103	0.367727	0.327	0.022	1.53919e-98
RPL31	9.9454e-103	0.466037	0.985	0.977	1.59365e-98
MTHFD2	1.09364e-102	0.413155	0.432	0.071	1.75244e-98
NSA2	1.70469e-102	0.475478	0.498	0.113	2.7316e-98
CHCHD10	2.41012e-102	0.473738	0.445	0.082	3.86198e-98
TPT1	2.743e-102	0.458387	0.937	0.803	4.39539e-98
MT-ATP6	5.14674e-102	0.474756	0.917	0.72	8.24714e-98
ZC3H15	5.85071e-102	0.426565	0.484	0.104	9.37518e-98
POLR2K	6.37444e-102	0.408622	0.423	0.068	1.02144e-97
ADRM1	8.67448e-102	0.448031	0.476	0.099	1.39e-97
WARS	9.25007e-102	0.454612	0.512	0.124	1.48223e-97
NIFK	1.1033e-101	0.40932	0.385	0.049	1.76793e-97
TNFAIP8	1.38194e-101	0.405689	0.424	0.069	2.21442e-97
NDUFAF2	2.50235e-101	0.344033	0.357	0.035	4.00977e-97
RRP7A	3.80222e-101	0.417969	0.409	0.062	6.09267e-97
NOP16	4.32375e-101	0.440276	0.404	0.059	6.92837e-97
GTF2A2	1.51584e-100	0.464906	0.495	0.117	2.42898e-96
MRPL3	2.49727e-100	0.389574	0.393	0.055	4.00163e-96
GPATCH4	2.99089e-100	0.424694	0.37	0.044	4.7926e-96
UQCC2	6.72858e-100	0.377043	0.402	0.059	1.07819e-95
SSB	7.80305e-100	0.416779	0.48	0.105	1.25036e-95
CORO1A	1.31317e-99	0.588598	0.738	0.381	2.10422e-95
EIF5	1.4202e-99	0.437353	0.469	0.098	2.27573e-95
PSMC4	1.42726e-99	0.401135	0.407	0.062	2.28705e-95
NAA20	1.50347e-99	0.39123	0.432	0.076	2.40917e-95
NMT1	3.01681e-99	0.447873	0.547	0.154	4.83414e-95
C14orf166	4.31392e-99	0.437155	0.502	0.12	6.91262e-95
ATP5EP2	4.5171e-99	0.440843	0.558	0.163	7.2382e-95
C11orf48	6.1372e-99	0.452953	0.458	0.095	9.83426e-95
COX16	1.34443e-98	0.434168	0.486	0.11	2.15431e-94
NUTF2	1.3684e-98	0.41289	0.43	0.076	2.19272e-94
SERP1	2.37082e-98	0.517223	0.568	0.178	3.799e-94
NDFIP2	2.46859e-98	0.292127	0.3	0.016	3.95566e-94
NDUFA3	3.04042e-98	0.523081	0.698	0.325	4.87196e-94
CCDC124	4.59773e-98	0.378986	0.387	0.053	7.36741e-94
CDV3	4.70587e-98	0.421756	0.417	0.07	7.54069e-94
ABRACL	4.83299e-98	0.441519	0.559	0.165	7.74439e-94
MRPS34	5.31088e-98	0.44753	0.437	0.081	8.51016e-94
HNRNPK	7.31786e-98	0.475755	0.636	0.246	1.17261e-93
NCBP2	1.00799e-97	0.368968	0.382	0.051	1.6152e-93
NDUFB3	1.25916e-97	0.420948	0.495	0.12	2.01768e-93
TUBA1C	1.60365e-97	0.329852	0.322	0.025	2.56968e-93
YWHAE	2.21183e-97	0.455987	0.467	0.102	3.54424e-93
LSM2	2.39406e-97	0.422149	0.439	0.084	3.83624e-93
NOP58	2.44266e-97	0.407427	0.441	0.084	3.91412e-93
KIAA0020	3.7923e-97	0.35652	0.371	0.046	6.07678e-93
ATP6V0E1	5.07546e-97	0.478139	0.636	0.241	8.13292e-93
MYEOV2	5.08274e-97	0.500559	0.602	0.211	8.14458e-93
RPS17	8.75393e-97	0.447851	0.509	0.135	1.40273e-92
HNRNPF	1.65902e-96	0.400119	0.482	0.11	2.65841e-92
NDUFB6	1.78463e-96	0.422838	0.438	0.085	2.8597e-92
HN1	2.08076e-96	0.389629	0.387	0.056	3.33421e-92
POLR2F	2.58441e-96	0.459368	0.486	0.117	4.14126e-92
HNRNPD	3.68116e-96	0.460048	0.513	0.138	5.89869e-92
ATP5C1	4.52144e-96	0.430642	0.458	0.099	7.24515e-92
ATP5A1	4.71771e-96	0.431586	0.528	0.145	7.55965e-92
ATOX1	4.83393e-96	0.39559	0.422	0.075	7.7459e-92
TUBB4B	4.93495e-96	0.393343	0.392	0.059	7.90776e-92
HLA-E	6.79692e-96	0.458833	0.858	0.59	1.08914e-91
SPCS1	1.07161e-95	0.491854	0.585	0.204	1.71715e-91
RPL30	1.0785e-95	0.479876	0.96	0.908	1.72819e-91
P4HB	1.54087e-95	0.382535	0.416	0.072	2.46908e-91
H2AFZ	1.56155e-95	0.578839	0.626	0.25	2.50224e-91
RNF181	1.68493e-95	0.412255	0.491	0.12	2.69993e-91
RBMX	1.96725e-95	0.481188	0.569	0.183	3.15232e-91
ANAPC11	2.32468e-95	0.422238	0.503	0.126	3.72506e-91
DDX1	2.43564e-95	0.438133	0.419	0.076	3.90287e-91
RBM17	3.43881e-95	0.403955	0.412	0.071	5.51035e-91
EIF2S1	7.11194e-95	0.393494	0.378	0.054	1.13962e-90
BST2	9.94716e-95	0.483363	0.508	0.135	1.59393e-90
DNAJB11	1.04097e-94	0.387159	0.416	0.073	1.66805e-90
MRP63	1.17971e-94	0.466899	0.514	0.14	1.89037e-90
ATP5F1	1.93956e-94	0.406521	0.471	0.107	3.10795e-90
PMF1	2.93124e-94	0.361882	0.393	0.061	4.69701e-90
CD320	3.03783e-94	0.346846	0.348	0.039	4.86781e-90
TMEM167A	6.48813e-94	0.341594	0.353	0.042	1.03966e-89
TPM4	6.98886e-94	0.391673	0.367	0.049	1.11989e-89
TXNL1	7.085e-94	0.359163	0.375	0.052	1.1353e-89
STOML2	9.11541e-94	0.426667	0.412	0.073	1.46065e-89
LINC00116	1.06245e-93	0.38344	0.415	0.074	1.70247e-89
IMP4	2.64593e-93	0.389402	0.401	0.067	4.23984e-89
H3F3A	3.65607e-93	0.52496	0.739	0.414	5.85849e-89
MRPL47	4.15867e-93	0.3469	0.351	0.041	6.66385e-89
XCL1	4.53777e-93	1.05945	0.314	0.027	7.27131e-89
PGK1	5.12033e-93	0.50289	0.553	0.176	8.20482e-89
TMEM126A	7.97524e-93	0.343953	0.344	0.039	1.27795e-88
MRPS15	9.37122e-93	0.372243	0.381	0.057	1.50164e-88
POLR2H	2.76625e-92	0.411138	0.379	0.057	4.43265e-88
GLRX3	3.6352e-92	0.358013	0.36	0.048	5.82504e-88
NDUFA12	4.50409e-92	0.406601	0.502	0.133	7.21735e-88
HMGN2	9.139e-92	0.480206	0.638	0.267	1.46443e-87
IMPDH2	9.71794e-92	0.411809	0.412	0.076	1.5572e-87
SIVA1	1.29291e-91	0.395502	0.465	0.107	2.07175e-87
LDHB	1.77331e-91	0.620402	0.712	0.364	2.84155e-87
C11orf58	2.14836e-91	0.486096	0.587	0.216	3.44253e-87
TMBIM6	2.32016e-91	0.422307	0.573	0.19	3.71782e-87
DNLZ	2.42795e-91	0.307752	0.338	0.037	3.89055e-87
CDC42	2.95632e-91	0.442415	0.576	0.197	4.7372e-87
PSMD13	3.50421e-91	0.367594	0.401	0.07	5.61514e-87
MT-CO1	6.38904e-91	0.445926	0.98	0.948	1.02378e-86
NDUFS8	1.69809e-90	0.381477	0.442	0.095	2.72101e-86
KDELR2	1.84551e-90	0.345047	0.392	0.064	2.95725e-86
RPA3	2.13596e-90	0.381885	0.423	0.084	3.42267e-86
TIMM17A	3.60337e-90	0.381437	0.363	0.052	5.77404e-86
PDAP1	4.99464e-90	0.457927	0.454	0.107	8.00341e-86
PWP1	5.36895e-90	0.363723	0.382	0.061	8.60321e-86
CNPY2	1.86528e-89	0.402816	0.43	0.089	2.98893e-85
UQCR10	3.41507e-89	0.51843	0.644	0.294	5.47231e-85
RRP15	3.71042e-89	0.306355	0.319	0.032	5.94558e-85
ARF1	3.91689e-89	0.424324	0.506	0.143	6.27642e-85
MRPL1	6.68204e-89	0.328506	0.319	0.032	1.07073e-84
RPL3	9.49957e-89	0.482134	0.995	0.973	1.52221e-84
SKP1	1.14407e-88	0.469318	0.666	0.309	1.83326e-84
LY6E	1.28803e-88	0.492345	0.659	0.303	2.06393e-84
RAC2	1.44743e-88	0.410532	0.561	0.185	2.31937e-84
MYC	1.50052e-88	0.408153	0.368	0.057	2.40444e-84
PSMB10	4.43947e-88	0.428458	0.551	0.184	7.11381e-84
EMP3	4.58683e-88	0.554625	0.72	0.406	7.34993e-84
MT-ND2	5.30417e-88	0.476833	0.907	0.711	8.4994e-84
DNAJC15	6.54633e-88	0.31211	0.341	0.043	1.04898e-83
CCL3L1	6.78855e-88	1.07144	0.254	0.009	1.0878e-83
STRA13	6.79124e-88	0.372067	0.382	0.064	1.08823e-83
GTPBP4	7.7536e-88	0.32472	0.338	0.041	1.24244e-83
PSMC5	8.32825e-88	0.40271	0.473	0.118	1.33452e-83
TXNL4A	1.28748e-87	0.389944	0.446	0.101	2.06305e-83
GTF3A	1.36063e-87	0.482269	0.529	0.17	2.18027e-83
WDR83OS	2.42612e-87	0.397472	0.524	0.157	3.88761e-83
HSPA9	7.25562e-87	0.337391	0.368	0.057	1.16264e-82
LAGE3	1.20028e-86	0.340755	0.397	0.073	1.92333e-82
RSL24D1	1.3773e-86	0.413115	0.479	0.129	2.20698e-82
PHPT1	1.8313e-86	0.347065	0.42	0.086	2.93447e-82
RPS14	1.84184e-86	0.441356	0.995	0.998	2.95136e-82
APOBEC3G	2.60153e-86	0.473143	0.509	0.15	4.1687e-82
GUK1	2.66378e-86	0.44514	0.595	0.225	4.26844e-82
RPS19BP1	3.91403e-86	0.436946	0.452	0.109	6.27184e-82
PRF1	4.40554e-86	0.388107	0.42	0.087	7.05943e-82
EIF3A	5.20376e-86	0.368302	0.396	0.074	8.3385e-82
AIMP1	5.31512e-86	0.380052	0.393	0.073	8.51695e-82
FBL	6.27365e-86	0.452929	0.509	0.153	1.00529e-81
NDUFS7	7.68479e-86	0.3634	0.453	0.107	1.23141e-81
MRPL13	1.20245e-85	0.335586	0.336	0.043	1.9268e-81
TCP1	1.78939e-85	0.405484	0.409	0.084	2.86733e-81
ACP1	2.29113e-85	0.353472	0.405	0.08	3.67131e-81
PARP1	2.37213e-85	0.37259	0.423	0.09	3.80111e-81
PRDX4	2.86555e-85	0.328508	0.323	0.038	4.59175e-81
CSNK2B	4.43788e-85	0.389236	0.428	0.095	7.11126e-81
SURF4	6.10899e-85	0.356513	0.37	0.061	9.78905e-81
SUPT16H	6.59292e-85	0.407823	0.379	0.067	1.05645e-80
BUD31	8.00264e-85	0.371024	0.447	0.108	1.28234e-80
NAP1L1	8.73971e-85	0.528092	0.596	0.242	1.40045e-80
RNF19A	9.96924e-85	0.304856	0.362	0.055	1.59747e-80
BRIX1	1.61687e-84	0.340604	0.349	0.051	2.59087e-80
CDC37	1.76999e-84	0.399042	0.434	0.099	2.83624e-80
TAF9	1.79877e-84	0.363633	0.417	0.088	2.88235e-80
CCDC85B	2.23559e-84	0.453597	0.46	0.117	3.58231e-80
CDK4	2.40639e-84	0.344595	0.336	0.045	3.85599e-80
C8orf59	3.23197e-84	0.423665	0.467	0.124	5.17891e-80
HNRNPA1L2	4.06573e-84	0.338019	0.372	0.063	6.51493e-80
TMEM147	7.96758e-84	0.386143	0.411	0.087	1.27672e-79
HSBP1	1.07961e-83	0.351871	0.397	0.078	1.72997e-79
DESI1	1.34883e-83	0.2783	0.281	0.022	2.16137e-79
RHOA	1.43353e-83	0.40941	0.517	0.16	2.29708e-79
ANP32E	1.80033e-83	0.357349	0.385	0.071	2.88486e-79
MDH2	2.10103e-83	0.386534	0.428	0.099	3.36669e-79
ARF6	2.18691e-83	0.360841	0.465	0.12	3.5043e-79
VCP	2.3946e-83	0.362148	0.415	0.088	3.8371e-79
SSR3	2.76175e-83	0.352407	0.368	0.062	4.42542e-79
MRPS23	2.79376e-83	0.336915	0.347	0.051	4.47673e-79
SRP19	2.93374e-83	0.324383	0.362	0.058	4.70102e-79
CD74	3.29928e-83	0.465535	0.81	0.536	5.28677e-79
SRP72	3.35289e-83	0.330421	0.36	0.059	5.37267e-79
CNBP	4.81476e-83	0.465711	0.662	0.316	7.71517e-79
CYC1	5.43054e-83	0.411909	0.394	0.079	8.7019e-79
CLTA	1.80619e-82	0.377335	0.412	0.088	2.89424e-78
PSMD11	2.1125e-82	0.33009	0.342	0.051	3.38508e-78
NDUFC1	2.1154e-82	0.387229	0.46	0.12	3.38971e-78
ARPC1B	2.23382e-82	0.408536	0.566	0.204	3.57948e-78
ARHGDIA	5.15445e-82	0.373868	0.453	0.115	8.25949e-78
UFM1	6.02451e-82	0.32959	0.34	0.049	9.65367e-78
TPRKB	6.2008e-82	0.319685	0.347	0.052	9.93616e-78
TMED2	9.11487e-82	0.317006	0.377	0.067	1.46057e-77
EIF3M	1.0705e-81	0.412196	0.505	0.156	1.71537e-77
NDUFA2	1.23716e-81	0.371785	0.482	0.136	1.98243e-77
VDAC2	1.52939e-81	0.385983	0.401	0.084	2.45069e-77
RPF2	2.69474e-81	0.296436	0.302	0.032	4.31805e-77
CKS2	5.86139e-81	0.342429	0.307	0.036	9.39229e-77
MRPS24	6.14022e-81	0.333239	0.357	0.06	9.83908e-77
CACYBP	6.64745e-81	0.42376	0.432	0.106	1.06519e-76
POLR2J	7.22916e-81	0.361611	0.427	0.098	1.1584e-76
MRPL4	1.75447e-80	0.323361	0.333	0.048	2.81136e-76
TMCO1	1.86064e-80	0.354594	0.439	0.107	2.98149e-76
PSMB4	2.47041e-80	0.304485	0.347	0.054	3.95858e-76
KPNB1	3.39891e-80	0.369774	0.382	0.074	5.44641e-76
XRCC6	7.33658e-80	0.398021	0.479	0.138	1.17561e-75
CRTAM	8.15934e-80	0.343951	0.27	0.021	1.30745e-75
FRG1	1.74891e-79	0.342176	0.432	0.104	2.80245e-75
YRDC	3.60162e-79	0.308722	0.271	0.023	5.77123e-75
MTFP1	3.71368e-79	0.28762	0.293	0.031	5.95081e-75
GGCT	3.74204e-79	0.302925	0.304	0.036	5.99625e-75
NDUFAF4	4.45918e-79	0.294259	0.308	0.038	7.14538e-75
S100A10	7.45219e-79	0.453921	0.606	0.261	1.19414e-74
UBC	9.547e-79	0.481075	0.707	0.389	1.52981e-74
IFI16	9.92722e-79	0.375117	0.498	0.154	1.59074e-74
TRAPPC4	1.11333e-78	0.3443	0.386	0.079	1.78399e-74
RPL34	1.4712e-78	0.360348	0.993	0.998	2.35744e-74
UTP11L	1.49755e-78	0.324215	0.312	0.041	2.39968e-74
MRPL32	1.64915e-78	0.305129	0.341	0.054	2.6426e-74
POLR3K	1.84373e-78	0.329586	0.312	0.041	2.9544e-74
POLR2I	2.37047e-78	0.414218	0.482	0.146	3.79844e-74
AK2	2.66359e-78	0.312294	0.317	0.043	4.26814e-74
NOLC1	3.22636e-78	0.34893	0.372	0.071	5.16991e-74
MRPS16	3.47034e-78	0.298795	0.336	0.052	5.56087e-74
CISD2	3.84886e-78	0.297052	0.299	0.035	6.16741e-74
PSMD1	4.00522e-78	0.300514	0.307	0.038	6.41797e-74
GHITM	4.53996e-78	0.35978	0.43	0.107	7.27484e-74
MRPL27	5.72584e-78	0.293853	0.321	0.045	9.17508e-74
PPM1G	1.03766e-77	0.376492	0.363	0.068	1.66274e-73
PSMA6	1.20701e-77	0.322981	0.344	0.057	1.93412e-73
PRRC2C	1.37775e-77	0.382007	0.492	0.153	2.20771e-73
C4orf32	1.63092e-77	0.271962	0.263	0.021	2.61339e-73
EMC6	3.14986e-77	0.335984	0.36	0.067	5.04733e-73
NDUFAF3	3.32361e-77	0.367925	0.456	0.126	5.32575e-73
SFPQ	3.60156e-77	0.346549	0.381	0.077	5.77114e-73
PPP1R14B	4.38943e-77	0.423736	0.482	0.143	7.03362e-73
SRPRB	5.2766e-77	0.293247	0.295	0.034	8.45523e-73
PET100	6.47555e-77	0.424906	0.614	0.276	1.03764e-72
THOC7	6.9917e-77	0.329918	0.389	0.083	1.12035e-72
COA4	8.915e-77	0.300663	0.302	0.037	1.42854e-72
C12orf57	9.3773e-77	0.374181	0.479	0.142	1.50262e-72
PSMD6	1.08168e-76	0.314647	0.345	0.059	1.73329e-72
CDK2AP2	1.51337e-76	0.342978	0.405	0.093	2.42502e-72
MRPL22	1.67445e-76	0.322468	0.356	0.065	2.68313e-72
MRPS36	2.34463e-76	0.326142	0.366	0.07	3.75704e-72
PRDM1	2.84512e-76	0.311377	0.306	0.04	4.55902e-72
SYNCRIP	3.31738e-76	0.328585	0.351	0.063	5.31576e-72
C19orf24	3.58643e-76	0.341941	0.362	0.068	5.7469e-72
CISD3	5.06695e-76	0.347559	0.34	0.057	8.11928e-72
CITE-CD279-PD1-ACAGCGCCGTATTTA	6.56285e-76	0.5016	0.999	1	1.05163e-71
MRPL17	6.71931e-76	0.322601	0.307	0.041	1.0767e-71
SNHG15	9.01831e-76	0.292715	0.292	0.035	1.44509e-71
PRDX2	1.19288e-75	0.391334	0.486	0.153	1.91147e-71
DRAP1	1.23587e-75	0.402274	0.568	0.228	1.98036e-71
SRRM2	1.90627e-75	0.387056	0.558	0.212	3.05461e-71
MRPL15	2.09605e-75	0.278265	0.286	0.032	3.35871e-71
NAMPT	2.19636e-75	0.285653	0.304	0.04	3.51945e-71
PCBP1	2.60197e-75	0.433656	0.589	0.246	4.1694e-71
BAX	2.6951e-75	0.3824	0.457	0.131	4.31863e-71
NDUFB10	3.05974e-75	0.403021	0.494	0.157	4.90293e-71
C20orf24	3.20876e-75	0.386099	0.427	0.11	5.14172e-71
SNF8	3.33802e-75	0.321131	0.351	0.063	5.34884e-71
PIM3	3.81526e-75	0.339358	0.302	0.04	6.11357e-71
RPL26L1	4.49703e-75	0.338984	0.327	0.052	7.20604e-71
PHB2	6.02274e-75	0.363167	0.392	0.088	9.65084e-71
SSNA1	7.17101e-75	0.328499	0.382	0.081	1.14908e-70
EIF4A3	7.9733e-75	0.277505	0.321	0.048	1.27764e-70
TNF	8.93102e-75	0.384118	0.315	0.046	1.43111e-70
MYL12B	1.27058e-74	0.415964	0.703	0.381	2.03598e-70
UQCRFS1	1.29286e-74	0.367047	0.437	0.119	2.07168e-70
TYMP	1.62552e-74	0.380463	0.467	0.138	2.60473e-70
PSMD4	2.02421e-74	0.372552	0.431	0.117	3.24359e-70
RER1	2.47304e-74	0.33863	0.381	0.082	3.9628e-70
NASP	2.57606e-74	0.321321	0.326	0.052	4.12789e-70
ST13	3.25963e-74	0.393224	0.464	0.14	5.22323e-70
RUVBL1	3.61473e-74	0.272358	0.273	0.028	5.79225e-70
CTSC	5.52157e-74	0.354537	0.377	0.08	8.84776e-70
CHMP2A	6.92845e-74	0.325722	0.393	0.09	1.11022e-69
AP2B1	8.40642e-74	0.337317	0.432	0.113	1.34704e-69
RAB27A	1.09302e-73	0.321719	0.352	0.066	1.75146e-69
SH3BGRL3	1.85363e-73	0.493306	0.817	0.598	2.97025e-69
ACTR3	2.05355e-73	0.317075	0.374	0.079	3.29061e-69
FAM136A	2.37115e-73	0.306779	0.31	0.045	3.79953e-69
H2AFY	2.55739e-73	0.310274	0.352	0.067	4.09796e-69
MDH1	3.34914e-73	0.311751	0.37	0.077	5.36666e-69
MRPS21	4.09317e-73	0.404679	0.499	0.168	6.5589e-69
AHSA1	4.21553e-73	0.315914	0.326	0.054	6.75496e-69
POLR2E	4.36326e-73	0.3261	0.389	0.089	6.99168e-69
EXOSC8	4.52036e-73	0.321334	0.321	0.051	7.24342e-69
APEX1	6.50253e-73	0.335376	0.378	0.083	1.04197e-68
PCNA	6.96427e-73	0.346288	0.337	0.06	1.11596e-68
DDX5	8.01007e-73	0.408028	0.734	0.439	1.28353e-68
ATP5O	1.07635e-72	0.360736	0.542	0.204	1.72474e-68
NOP14	1.31307e-72	0.252368	0.244	0.018	2.10407e-68
CFLAR	1.4768e-72	0.345145	0.464	0.14	2.36643e-68
SRRM1	2.53252e-72	0.41524	0.533	0.206	4.05811e-68
BRK1	2.61888e-72	0.385996	0.531	0.2	4.19649e-68
SON	3.11934e-72	0.402265	0.718	0.417	4.99843e-68
ILF3	3.25804e-72	0.341427	0.368	0.078	5.22069e-68
MRPL21	3.43428e-72	0.327399	0.341	0.063	5.50309e-68
POLE3	5.67312e-72	0.317944	0.312	0.049	9.09061e-68
SELT	6.81868e-72	0.318249	0.393	0.093	1.09262e-67
LARS	8.81608e-72	0.272337	0.3	0.042	1.41269e-67
CALM3	8.97812e-72	0.349799	0.447	0.13	1.43865e-67
HM13	1.1015e-71	0.296789	0.355	0.07	1.76505e-67
PABPC1	1.1552e-71	0.423724	0.763	0.462	1.85109e-67
YIF1A	1.31333e-71	0.281316	0.292	0.039	2.10448e-67
NDUFA9	1.46877e-71	0.271944	0.303	0.044	2.35355e-67
WBSCR22	1.50017e-71	0.302147	0.351	0.068	2.40388e-67
PPAN	1.51098e-71	0.263419	0.25	0.021	2.4212e-67
EMG1	1.86973e-71	0.348616	0.337	0.063	2.99605e-67
STRAP	2.20685e-71	0.289964	0.31	0.048	3.53625e-67
TRA2B	2.2532e-71	0.366204	0.497	0.168	3.61053e-67
BCL7C	2.33144e-71	0.292095	0.337	0.061	3.7359e-67
IRF4	2.48759e-71	0.295632	0.325	0.055	3.98612e-67
SLC3A2	4.40948e-71	0.338038	0.371	0.082	7.06575e-67
RNASEH2C	5.08316e-71	0.316573	0.367	0.079	8.14525e-67
PRDX3	6.88052e-71	0.304144	0.349	0.069	1.10253e-66
DCUN1D5	7.14461e-71	0.259551	0.261	0.026	1.14485e-66
CKS1B	1.02227e-70	0.29522	0.276	0.033	1.63809e-66
PPDPF	1.13567e-70	0.396065	0.681	0.364	1.8198e-66
EEF1G	1.17717e-70	0.381679	0.495	0.174	1.8863e-66
PDIA4	1.20673e-70	0.288439	0.3	0.044	1.93367e-66
PDCD11	1.63108e-70	0.281983	0.288	0.038	2.61364e-66
GPR171	1.94711e-70	0.307608	0.349	0.068	3.12005e-66
RAD23A	2.05436e-70	0.326988	0.377	0.085	3.2919e-66
PAM16	2.2665e-70	0.292042	0.255	0.025	3.63184e-66
MT-CO3	2.856e-70	0.370777	0.981	0.949	4.57646e-66
METTL5	3.75712e-70	0.318535	0.334	0.062	6.0204e-66
GSPT1	1.79784e-69	0.30085	0.338	0.065	2.88087e-65
COPRS	2.32287e-69	0.256916	0.252	0.024	3.72216e-65
RPF1	4.36125e-69	0.274391	0.318	0.054	6.98847e-65
MRPL24	6.55292e-69	0.26968	0.285	0.039	1.05004e-64
MRPL11	6.60777e-69	0.324679	0.345	0.07	1.05883e-64
DNAJC2	7.56569e-69	0.259811	0.295	0.043	1.21233e-64
ARF4	7.68165e-69	0.27284	0.282	0.038	1.23091e-64
NDUFB1	8.8995e-69	0.376849	0.584	0.253	1.42606e-64
EED	1.33351e-68	0.292513	0.265	0.031	2.13682e-64
PUF60	1.3653e-68	0.312392	0.363	0.08	2.18776e-64
EIF3E	1.40232e-68	0.358729	0.486	0.166	2.24708e-64
ORMDL2	1.57325e-68	0.255202	0.31	0.05	2.52097e-64
CEBPZ	2.17434e-68	0.315005	0.36	0.079	3.48416e-64
RP11-345J4.5	2.41598e-68	0.276135	0.286	0.04	3.87136e-64
NARS	2.61836e-68	0.310861	0.327	0.061	4.19567e-64
COX4I1	2.64031e-68	0.414937	0.805	0.598	4.23083e-64
SUPT4H1	2.65429e-68	0.334579	0.396	0.1	4.25323e-64
FAM162A	2.89285e-68	0.32415	0.356	0.077	4.6355e-64
LRRFIP1	3.01398e-68	0.315496	0.437	0.126	4.8296e-64
TNFRSF18	4.13156e-68	0.313618	0.288	0.041	6.62041e-64
ATP5H	5.2259e-68	0.34338	0.484	0.166	8.37399e-64
CSF2	5.92857e-68	1.38935	0.231	0.018	9.49994e-64
RWDD1	6.04007e-68	0.337357	0.417	0.117	9.67861e-64
SS18L2	6.5187e-68	0.341064	0.409	0.111	1.04456e-63
LYST	8.62816e-68	0.289011	0.321	0.057	1.38258e-63
AUP1	9.48671e-68	0.305679	0.325	0.06	1.52015e-63
KRT10	1.05613e-67	0.372323	0.518	0.195	1.69235e-63
RBM39	1.18682e-67	0.395282	0.559	0.238	1.90175e-63
CANX	1.29108e-67	0.279781	0.321	0.057	2.06883e-63
SMS	1.51835e-67	0.265986	0.255	0.027	2.43301e-63
REEP5	1.79409e-67	0.307191	0.398	0.102	2.87485e-63
SDHB	1.82247e-67	0.291234	0.334	0.065	2.92032e-63
ESF1	2.1416e-67	0.274546	0.315	0.055	3.43171e-63
RUVBL2	2.84073e-67	0.265106	0.251	0.026	4.55198e-63
PPP1CA	3.70698e-67	0.385808	0.521	0.203	5.94006e-63
MRPS7	3.72312e-67	0.313127	0.363	0.082	5.96592e-63
HNRNPR	5.23978e-67	0.313906	0.347	0.074	8.39623e-63
C11orf73	1.14133e-66	0.268121	0.297	0.048	1.82886e-62
LMAN2	1.14766e-66	0.300694	0.409	0.111	1.83901e-62
RNPS1	1.82232e-66	0.32297	0.386	0.098	2.92009e-62
FDPS	1.86684e-66	0.294483	0.334	0.067	2.99143e-62
POLD2	2.03112e-66	0.276112	0.276	0.038	3.25467e-62
SF3B2	2.05989e-66	0.333726	0.422	0.12	3.30077e-62
TKT	2.35738e-66	0.265424	0.282	0.041	3.77747e-62
MCTS1	2.82111e-66	0.264033	0.295	0.046	4.52055e-62
RAC1	3.27773e-66	0.366164	0.437	0.134	5.25223e-62
MRPL36	3.28622e-66	0.287939	0.337	0.068	5.26584e-62
TIMM44	3.36971e-66	0.26212	0.278	0.039	5.39962e-62
RPN2	3.83055e-66	0.280676	0.325	0.062	6.13808e-62
ARPC4	7.14901e-66	0.306313	0.368	0.087	1.14556e-61
ITGB1BP1	7.44456e-66	0.273378	0.311	0.056	1.19292e-61
PTPN7	8.49697e-66	0.303044	0.342	0.073	1.36155e-61
MRPL18	8.84226e-66	0.3055	0.338	0.07	1.41688e-61
ODC1	8.90124e-66	0.271335	0.273	0.037	1.42634e-61
DPY30	1.23047e-65	0.282284	0.352	0.077	1.97171e-61
UXT	1.791e-65	0.363165	0.528	0.214	2.86991e-61
TTC1	1.84206e-65	0.31403	0.359	0.082	2.95172e-61
SRPK1	1.91358e-65	0.265364	0.282	0.042	3.06632e-61
PEBP1	2.00116e-65	0.362948	0.424	0.13	3.20667e-61
PSMC2	2.89292e-65	0.286802	0.327	0.065	4.63561e-61
DDT	4.08239e-65	0.302374	0.371	0.09	6.54163e-61
ENSA	4.20241e-65	0.306871	0.404	0.11	6.73394e-61
FAM207A	4.52011e-65	0.257831	0.277	0.04	7.24303e-61
CISD1	5.70062e-65	0.274455	0.267	0.036	9.13467e-61
PAICS	6.93127e-65	0.268962	0.286	0.045	1.11067e-60
SNRNP27	1.05255e-64	0.268821	0.327	0.065	1.6866e-60
PFDN4	1.23647e-64	0.286153	0.33	0.067	1.98133e-60
TDG	1.33108e-64	0.264266	0.28	0.041	2.13293e-60
MLEC	1.38978e-64	0.268694	0.285	0.044	2.22698e-60
BAZ1A	1.52639e-64	0.279682	0.33	0.067	2.44588e-60
GDI2	1.63429e-64	0.28649	0.329	0.067	2.61878e-60
MTCH2	1.65922e-64	0.257658	0.265	0.035	2.65874e-60
CDC123	1.95638e-64	0.323204	0.33	0.069	3.1349e-60
RPA2	1.98733e-64	0.282333	0.337	0.071	3.1845e-60
FIS1	2.02619e-64	0.282507	0.383	0.097	3.24676e-60
SRP9	2.17118e-64	0.324651	0.426	0.128	3.4791e-60
UBE2I	2.31973e-64	0.357451	0.446	0.145	3.71714e-60
RAP1B	2.80816e-64	0.313732	0.385	0.101	4.49979e-60
SNRNP70	3.07401e-64	0.250095	0.282	0.043	4.92579e-60
LSM1	3.24736e-64	0.280218	0.327	0.066	5.20356e-60
LSM4	3.40447e-64	0.360938	0.396	0.109	5.45532e-60
SMIM4	4.28556e-64	0.254832	0.296	0.049	6.86718e-60
ADSL	4.64504e-64	0.251426	0.277	0.041	7.44321e-60
HDDC2	4.71563e-64	0.296451	0.356	0.082	7.55633e-60
XBP1	4.90393e-64	0.28963	0.344	0.076	7.85806e-60
GPX4	4.99922e-64	0.329112	0.529	0.209	8.01075e-60
DCXR	6.80972e-64	0.258771	0.293	0.049	1.09119e-59
MRPL54	7.05054e-64	0.292284	0.381	0.096	1.12978e-59
CREM	8.82533e-64	0.302266	0.33	0.068	1.41417e-59
EXOSC4	9.37492e-64	0.269197	0.27	0.038	1.50224e-59
EIF4G2	1.25512e-63	0.298349	0.353	0.082	2.0112e-59
TXN2	1.94846e-63	0.287064	0.322	0.065	3.12221e-59
NUDT5	2.14054e-63	0.296509	0.303	0.056	3.43e-59
PRDX5	2.75712e-63	0.335323	0.497	0.184	4.41801e-59
REXO2	2.83246e-63	0.251419	0.306	0.056	4.53874e-59
PPP4C	4.97498e-63	0.291366	0.356	0.085	7.97191e-59
YBX3	5.70571e-63	0.280069	0.255	0.033	9.14283e-59
ATPIF1	9.09873e-63	0.389096	0.532	0.226	1.45798e-58
ANP32A	9.10086e-63	0.31833	0.363	0.092	1.45832e-58
WDR74	1.29117e-62	0.268725	0.289	0.049	2.06897e-58
APOBEC3C	1.40063e-62	0.329604	0.381	0.1	2.24437e-58
CD47	1.90586e-62	0.288717	0.372	0.096	3.05394e-58
C19orf43	2.45978e-62	0.390735	0.536	0.227	3.94154e-58
YWHAZ	4.67935e-62	0.371542	0.561	0.25	7.49819e-58
DNAJC7	5.80553e-62	0.288491	0.347	0.08	9.30278e-58
POP7	6.12359e-62	0.274465	0.276	0.043	9.81244e-58
GADD45B	1.19045e-61	0.353833	0.378	0.103	1.90757e-57
KTN1	1.28162e-61	0.349854	0.468	0.168	2.05367e-57
EIF1AY	1.41172e-61	0.298805	0.277	0.045	2.26214e-57
RPL7L1	1.90889e-61	0.289671	0.295	0.054	3.05881e-57
EEF1D	1.9498e-61	0.404933	0.842	0.661	3.12436e-57
PIM2	2.21083e-61	0.300978	0.314	0.063	3.54264e-57
TNIP3	2.21231e-61	0.264997	0.214	0.018	3.54501e-57
UFD1L	2.24828e-61	0.263335	0.308	0.06	3.60265e-57
TRAPPC2L	2.96768e-61	0.310941	0.362	0.092	4.75541e-57
EIF3G	2.98862e-61	0.368638	0.48	0.182	4.78897e-57
COA3	3.20605e-61	0.25016	0.284	0.048	5.13737e-57
POLE4	3.27703e-61	0.2724	0.318	0.066	5.25112e-57
SARS	3.79021e-61	0.301937	0.355	0.088	6.07344e-57
CD99	3.99489e-61	0.407084	0.525	0.227	6.40141e-57
UFC1	4.26135e-61	0.297347	0.404	0.117	6.82838e-57
ZFAS1	5.98017e-61	0.408518	0.527	0.228	9.58263e-57
PRKDC	6.53956e-61	0.278942	0.306	0.06	1.0479e-56
SLA	1.62967e-60	0.266583	0.299	0.056	2.61138e-56
EIF3H	2.20698e-60	0.336372	0.465	0.168	3.53646e-56
TAGLN2	2.33452e-60	0.38293	0.449	0.159	3.74083e-56
KHDRBS1	3.13389e-60	0.264369	0.353	0.087	5.02174e-56
SUMO1	3.52867e-60	0.302709	0.396	0.115	5.65433e-56
PSMD12	3.88877e-60	0.269889	0.291	0.053	6.23136e-56
UBE2D2	4.21246e-60	0.319101	0.426	0.137	6.75005e-56
RP11-138A9.2	1.38028e-59	0.272811	0.285	0.051	2.21176e-55
VAPA	1.41384e-59	0.261999	0.341	0.081	2.26554e-55
PHF5A	1.62729e-59	0.274843	0.278	0.048	2.60757e-55
CAPZA1	2.14095e-59	0.287533	0.359	0.092	3.43066e-55
IRF1	2.46376e-59	0.324984	0.447	0.157	3.94793e-55
PRDX6	5.653e-59	0.278086	0.348	0.087	9.05837e-55
RNF213	6.24032e-59	0.361284	0.542	0.236	9.99949e-55
S100A6	7.39176e-59	0.509284	0.791	0.588	1.18446e-54
SEC11A	7.47542e-59	0.283197	0.356	0.092	1.19786e-54
AP2S1	8.71251e-59	0.322058	0.394	0.119	1.39609e-54
PRR13	1.21214e-58	0.349415	0.476	0.181	1.94233e-54
S100A11	1.22537e-58	0.415743	0.615	0.331	1.96353e-54
TALDO1	1.67497e-58	0.321475	0.387	0.116	2.68398e-54
U2SURP	1.93466e-58	0.285564	0.367	0.1	3.10009e-54
EMC4	3.7794e-58	0.277181	0.325	0.074	6.0561e-54
2020-09-07	4.1168e-58	0.339117	0.561	0.262	6.59676e-54
SSRP1	4.38149e-58	0.273168	0.282	0.052	7.02091e-54
LAMTOR2	4.82168e-58	0.296424	0.342	0.085	7.72626e-54
MRPL55	5.21148e-58	0.303034	0.356	0.095	8.35088e-54
KARS	5.62376e-58	0.263337	0.314	0.068	9.01151e-54
2020-09-15	5.88599e-58	0.289656	0.375	0.105	9.43172e-54
IMP3	9.56826e-58	0.299002	0.364	0.099	1.53322e-53
ATP6V1F	1.47046e-57	0.329488	0.411	0.134	2.35627e-53
C4orf3	1.63587e-57	0.305547	0.525	0.219	2.62132e-53
LRRC59	2.07639e-57	0.273137	0.27	0.046	3.32721e-53
NDUFS3	2.59922e-57	0.285417	0.318	0.073	4.16499e-53
HSPB11	2.97894e-57	0.281078	0.326	0.077	4.77345e-53
EWSR1	3.77471e-57	0.259157	0.329	0.077	6.04859e-53
BSG	4.1311e-57	0.292765	0.378	0.11	6.61967e-53
CAMTA1	4.39728e-57	0.252392	0.311	0.067	7.04621e-53
DDOST	4.88148e-57	0.277919	0.326	0.077	7.82209e-53
PAPOLA	6.85842e-57	0.265546	0.329	0.078	1.09899e-52
PSMG2	2.04163e-56	0.254458	0.277	0.051	3.27151e-52
TRMT10C	2.38906e-56	0.260478	0.269	0.048	3.82822e-52
CYTIP	3.01573e-56	0.35296	0.36	0.101	4.83241e-52
IL2RG	3.03966e-56	0.319557	0.506	0.208	4.87075e-52
CLPP	5.70025e-56	0.254832	0.276	0.051	9.13409e-52
MESDC2	6.36919e-56	0.253638	0.311	0.069	1.0206e-51
SAR1A	9.13177e-56	0.277036	0.322	0.077	1.46327e-51
POLR2G	9.18758e-56	0.297341	0.364	0.104	1.47222e-51
PTP4A2	9.24239e-56	0.307003	0.439	0.157	1.481e-51
RNF145	9.25637e-56	0.263258	0.315	0.073	1.48324e-51
VPS29	1.07657e-55	0.290642	0.366	0.104	1.7251e-51
NSRP1	1.45583e-55	0.254686	0.317	0.073	2.33282e-51
PCBP2	1.71235e-55	0.367265	0.517	0.231	2.74386e-51
G3BP1	1.93648e-55	0.250917	0.306	0.068	3.10302e-51
NUCKS1	4.1475e-55	0.314416	0.4	0.13	6.64595e-51
SNHG8	4.61641e-55	0.362996	0.443	0.167	7.39734e-51
JUNB	5.84464e-55	0.342416	0.396	0.126	9.36546e-51
UBE2L6	8.90637e-55	0.298017	0.383	0.119	1.42716e-50
HNRNPA0	9.90473e-55	0.315497	0.396	0.128	1.58713e-50
UBXN4	1.32068e-54	0.276695	0.398	0.126	2.11625e-50
TMED10	1.41118e-54	0.26518	0.288	0.06	2.26128e-50
DNAJC8	1.48722e-54	0.310314	0.413	0.142	2.38311e-50
CD7	1.57045e-54	0.322308	0.49	0.193	2.51648e-50
SDHC	1.96282e-54	0.268027	0.334	0.086	3.14522e-50
GBP1	2.33999e-54	0.252199	0.276	0.053	3.7496e-50
CCND3	2.59339e-54	0.278359	0.325	0.082	4.15565e-50
ORMDL1	2.77781e-54	0.27997	0.341	0.091	4.45116e-50
SFXN1	4.74724e-54	0.270292	0.327	0.082	7.60697e-50
TRAPPC3	5.4355e-54	0.25242	0.28	0.056	8.70985e-50
XRN2	5.52218e-54	0.255778	0.3	0.067	8.84873e-50
RAB7A	6.66766e-54	0.253508	0.325	0.081	1.06843e-49
C16orf13	9.05999e-54	0.277856	0.36	0.105	1.45177e-49
ARID5B	9.91183e-54	0.26228	0.307	0.071	1.58827e-49
USP16	1.11844e-53	0.25188	0.303	0.068	1.79219e-49
LAMTOR1	1.1593e-53	0.271407	0.338	0.09	1.85766e-49
MSN	1.71348e-53	0.297972	0.385	0.12	2.74569e-49
TNFRSF4	1.80511e-53	0.297964	0.296	0.067	2.8925e-49
TOMM20	1.91274e-53	0.275803	0.333	0.087	3.06497e-49
BUB3	2.22787e-53	0.275882	0.336	0.09	3.56994e-49
CIB1	3.23636e-53	0.368994	0.468	0.195	5.18595e-49
CWC15	3.3985e-53	0.255957	0.323	0.081	5.44576e-49
RBM25	4.15679e-53	0.287864	0.382	0.12	6.66085e-49
CKLF	5.34949e-53	0.338997	0.464	0.186	8.57202e-49
EFHD2	5.47444e-53	0.280288	0.372	0.113	8.77224e-49
ANXA2	5.642e-53	0.315572	0.37	0.113	9.04075e-49
NEAT1	6.16132e-53	0.374687	0.566	0.281	9.87291e-49
DNMT1	6.82296e-53	0.265288	0.293	0.065	1.09331e-48
CBX6	7.5225e-53	0.255615	0.295	0.066	1.20541e-48
CAP1	1.38166e-52	0.263498	0.356	0.103	2.21398e-48
SH2D2A	2.11297e-52	0.269058	0.307	0.073	3.38582e-48
BCLAF1	2.84319e-52	0.257552	0.319	0.081	4.55593e-48
CCL3L3	9.19541e-52	0.469595	0.192	0.019	1.47347e-47
TMEM160	9.94793e-52	0.274391	0.36	0.107	1.59406e-47
SEC62	2.07393e-51	0.29525	0.509	0.228	3.32327e-47
MCM7	2.26952e-51	0.272134	0.254	0.047	3.63669e-47
DUSP2	3.50501e-51	0.329252	0.338	0.097	5.61643e-47
PSMD2	4.48865e-51	0.256978	0.269	0.055	7.19261e-47
DEK	4.75469e-51	0.312818	0.375	0.12	7.61891e-47
SLTM	7.14773e-51	0.251734	0.306	0.075	1.14535e-46
PYURF	9.15095e-51	0.27612	0.37	0.116	1.46635e-46
MYL12A	1.59341e-50	0.347449	0.726	0.488	2.55329e-46
DSTN	8.22859e-50	0.301349	0.378	0.123	1.31855e-45
LCP1	1.16698e-49	0.300976	0.423	0.157	1.86997e-45
FUS	1.43428e-49	0.29745	0.441	0.171	2.29829e-45
WDR1	1.79218e-49	0.250309	0.321	0.087	2.87179e-45
COPS6	3.51044e-49	0.259064	0.33	0.094	5.62514e-45
DDX46	6.49994e-49	0.312852	0.381	0.131	1.04155e-44
TAPBP	2.18744e-48	0.263315	0.368	0.121	3.50516e-44
FXYD5	2.34069e-48	0.328507	0.585	0.315	3.75073e-44
CAPZB	3.52551e-48	0.279461	0.386	0.135	5.64927e-44
NAA38	4.56007e-48	0.280277	0.372	0.125	7.30705e-44
UQCRB	9.94834e-48	0.338386	0.738	0.559	1.59412e-43
EIF3F	1.04412e-47	0.327439	0.49	0.222	1.67309e-43
RSRC2	1.15073e-47	0.285073	0.37	0.123	1.84394e-43
TLN1	3.82252e-47	0.256312	0.371	0.123	6.12521e-43
ARF5	5.27752e-47	0.254642	0.321	0.092	8.45669e-43
TOMM7	5.38096e-47	0.373695	0.724	0.523	8.62245e-43
DNAJB6	8.60885e-47	0.255878	0.377	0.127	1.37948e-42
VAMP8	8.85478e-47	0.284102	0.475	0.207	1.41889e-42
SRSF11	1.03154e-46	0.272837	0.374	0.128	1.65294e-42
LTB	2.02764e-46	0.658902	0.652	0.426	3.24909e-42
SOD2	2.92058e-46	0.271715	0.402	0.149	4.67993e-42
MORF4L1	5.47652e-46	0.314372	0.449	0.193	8.77558e-42
HNRNPH1	6.93182e-46	0.354947	0.447	0.191	1.11076e-41
DDX24	8.38183e-46	0.319772	0.503	0.242	1.34311e-41
HMGA1	4.3212e-45	0.270032	0.3	0.083	6.9243e-41
TRAPPC1	1.25593e-44	0.276553	0.4	0.153	2.01249e-40
EIF3D	1.35615e-44	0.267455	0.367	0.128	2.17309e-40
ZFP36L1	1.69803e-44	0.257527	0.415	0.162	2.72092e-40
PLEK	1.89161e-44	0.313349	0.271	0.068	3.03112e-40
SNHG9	3.57981e-44	0.285022	0.379	0.138	5.73629e-40
SYNGR2	3.92041e-44	0.268889	0.319	0.098	6.28206e-40
SSU72	3.93083e-44	0.270141	0.375	0.135	6.29876e-40
PFDN5	1.12991e-43	0.29543	0.854	0.755	1.81056e-39
IFITM1	1.69195e-43	0.357317	0.716	0.509	2.71119e-39
KLRD1	6.75794e-43	0.254085	0.304	0.089	1.08289e-38
LINC00493	7.6596e-43	0.272563	0.36	0.129	1.22737e-38
THRAP3	1.12646e-42	0.258856	0.356	0.124	1.80504e-38
ZNHIT1	1.37088e-42	0.262368	0.355	0.123	2.1967e-38
IFI6	1.75836e-42	0.333489	0.431	0.181	2.81759e-38
MT-CYB	1.90664e-42	0.281625	0.865	0.731	3.0552e-38
RGCC	8.80295e-42	0.350408	0.337	0.118	1.41058e-37
BEST1	1.31036e-41	0.26547	0.401	0.162	2.09972e-37
BIRC3	2.08829e-41	0.266508	0.28	0.077	3.34628e-37
GPX1	3.40014e-41	0.272864	0.337	0.115	5.44838e-37
DUT	1.4722e-40	0.36458	0.344	0.125	2.35906e-36
CCL4L1	1.72284e-40	0.521554	0.141	0.011	2.76067e-36
GMFG	2.57815e-40	0.294655	0.599	0.364	4.13123e-36
RGS10	2.67894e-40	0.288182	0.411	0.179	4.29274e-36
MT2A	4.7876e-40	0.420523	0.554	0.309	7.67164e-36
ARL6IP4	1.81219e-39	0.286244	0.437	0.199	2.90386e-35
POLR1D	3.98671e-39	0.261959	0.308	0.102	6.3883e-35
HCST	5.32319e-39	0.302344	0.57	0.327	8.52988e-35
UCP2	6.89715e-39	0.264528	0.303	0.099	1.1052e-34
EID1	9.83575e-39	0.281481	0.364	0.14	1.57608e-34
CHURC1	2.53603e-38	0.273601	0.404	0.177	4.06373e-34
TSPO	3.31069e-38	0.261187	0.352	0.135	5.30504e-34
RP11-386G11.10	8.14303e-38	0.253368	0.352	0.134	1.30484e-33
RPS27L	5.18764e-37	0.2515	0.412	0.182	8.31268e-33
PLP2	6.44753e-37	0.273105	0.382	0.16	1.03315e-32
AC092580.4	3.06013e-36	0.566423	0.495	0.288	4.90355e-32
MT-ND3	3.87709e-36	0.27173	0.902	0.827	6.21265e-32
UBXN1	1.69082e-35	0.259705	0.39	0.17	2.70937e-31
IFITM2	3.35701e-35	0.284751	0.467	0.237	5.37928e-31
LAMTOR4	1.17047e-34	0.273375	0.445	0.222	1.87557e-30
ISG20	1.39005e-34	0.261796	0.502	0.266	2.22742e-30
RPS4Y1	1.72891e-34	0.377761	0.51	0.297	2.7704e-30
CIRBP	3.30512e-32	0.259532	0.509	0.293	5.29612e-28
ISG15	1.22935e-31	0.292077	0.465	0.245	1.96991e-27
HIGD2A	1.62019e-30	0.257047	0.383	0.181	2.59619e-26
HIST1H4C	5.53323e-28	0.265047	0.338	0.153	8.86645e-24
CCL20	8.64664e-22	0.268728	0.102	0.016	1.38554e-17
GNLY	7.86861e-16	0.359846	0.568	0.398	1.26087e-11

## Sheet: CD4T_Naive_AntiCD3
	p_val	avg_logFC	pct.1	pct.2	p_val_adj
CITE-CD69-GTCTCTTGGCTTAAA	0	3.27708	1	0.996	0
GAPDH	0	1.93968	0.999	0.634	0
CITE-CD25-TTTGTCCTGTACGCC	0	1.78504	1	0.995	0
HSP90AA1	0	1.71743	0.996	0.391	0
HSP90AB1	0	1.70416	1	0.583	0
HSPE1	0	1.69722	0.992	0.333	0
MIF	0	1.67415	0.999	0.618	0
TUBA1B	0	1.64703	0.993	0.376	0
ENO1	0	1.62575	0.998	0.499	0
YBX1	0	1.58541	1	0.572	0
NCL	0	1.54302	0.98	0.449	0
NPM1	0	1.52836	1	0.778	0
RAN	0	1.52293	0.993	0.396	0
CITE-CD278-ICOS-CGCGCACCCATTAAA	0	1.49506	1	1	0
CHCHD2	0	1.49505	0.997	0.407	0
SERBP1	0	1.49439	0.985	0.305	0
ACTG1	0	1.47847	0.995	0.478	0
FABP5	0	1.47772	0.924	0.157	0
ACTB	0	1.46282	1	0.967	0
PTMA	0	1.45791	1	0.982	0
PFN1	0	1.4519	1	0.808	0
SNRPG	0	1.44223	0.987	0.301	0
PSME2	0	1.43503	0.996	0.396	0
HSPD1	0	1.42688	0.971	0.262	0
EIF4A1	0	1.42449	0.998	0.461	0
LDHA	0	1.41764	0.994	0.333	0
TPI1	0	1.39947	0.992	0.404	0
SNRPE	0	1.39684	0.968	0.258	0
RPLP0	0	1.38319	1	0.894	0
POMP	0	1.38314	0.979	0.221	0
RPL37A	0	1.38183	1	0.99	0
TXN	0	1.3744	0.986	0.277	0
RANBP1	0	1.37315	0.962	0.206	0
RPS26	0	1.36497	1	0.797	0
NME1-NME2	0	1.36286	0.981	0.28	0
PSMA7	0	1.34963	0.988	0.32	0
EIF5A	0	1.3399	0.918	0.218	0
HNRNPA1	0	1.33194	1	0.643	0
SLC25A5	0	1.33064	0.965	0.245	0
C1QBP	0	1.33005	0.977	0.315	0
ALDOA	0	1.32382	0.993	0.435	0
UQCRQ	0	1.31336	0.979	0.324	0
TUBB	0	1.31036	0.972	0.29	0
NME1	0	1.30943	0.932	0.135	0
RPL7A	0	1.30083	0.999	0.827	0
PA2G4	0	1.29377	0.959	0.274	0
ATP5G3	0	1.28244	0.964	0.237	0
PPIA	0	1.27995	0.997	0.544	0
TMSB10	0	1.27721	1	0.984	0
PSME1	0	1.27671	0.994	0.486	0
SLIRP	0	1.27081	0.948	0.192	0
SNRPD1	0	1.27028	0.959	0.199	0
RPL5	0	1.26268	1	0.87	0
RPS24	0	1.26196	1	0.949	0
HMGB1	0	1.24184	0.97	0.471	0
SET	0	1.24073	0.964	0.355	0
HSPA8	0	1.24068	0.99	0.452	0
SUB1	0	1.24013	0.988	0.309	0
PRDX1	0	1.23926	0.956	0.196	0
SNRPF	0	1.23848	0.957	0.216	0
CYCS	0	1.23457	0.932	0.19	0
RPL23	0	1.23205	1	0.849	0
RPSA	0	1.23045	0.999	0.824	0
H3F3B	0	1.23007	0.996	0.59	0
USMG5	0	1.2297	0.988	0.318	0
MYL6	0	1.22864	0.996	0.588	0
RPSAP58	0	1.22825	0.998	0.717	0
RBM8A	0	1.22449	0.953	0.22	0
CFL1	0	1.22173	0.995	0.586	0
OAZ1	0	1.21622	0.994	0.556	0
TMA7	0	1.21563	1	0.751	0
RPS11	0	1.2121	1	0.851	0
PPA1	0	1.21156	0.941	0.207	0
PKM	0	1.20821	0.979	0.318	0
RPS5	0	1.20607	1	0.968	0
H2AFZ	0	1.20592	0.908	0.273	0
NDUFA4	0	1.20423	0.988	0.399	0
PSMB3	0	1.20078	0.976	0.232	0
RPS7	0	1.20003	1	0.931	0
RPL6	0	1.19425	1	0.937	0
GSTP1	0	1.18707	0.956	0.226	0
RPS16	0	1.18471	1	0.967	0
PSMB1	0	1.1804	0.961	0.271	0
DDX21	0	1.17832	0.911	0.153	0
POLR2L	0	1.17754	0.97	0.299	0
RPLP1	0	1.16225	1	1	0
COX7A2	0	1.15976	0.986	0.41	0
RPS2	0	1.15924	1	0.999	0
TCEB2	0	1.15833	0.993	0.436	0
RPL29	0	1.1575	1	0.96	0
UBB	0	1.15725	0.98	0.449	0
APRT	0	1.15701	0.988	0.409	0
RPL27	0	1.15561	1	0.94	0
ERH	0	1.15503	0.949	0.238	0
COX6A1	0	1.1545	0.976	0.272	0
RPL15	0	1.15389	1	0.98	0
ATP5I	0	1.14967	0.987	0.443	0
TRMT112	0	1.14943	0.952	0.289	0
HNRNPM	0	1.1452	0.949	0.249	0
GNB2L1	0	1.14518	1	0.882	0
SNRPB	0	1.14403	0.926	0.185	0
RPL35	0	1.14219	1	0.99	0
EIF2S2	0	1.1389	0.958	0.286	0
SRP14	0	1.13727	0.992	0.534	0
RPL17	0	1.13535	1	0.955	0
RPS10	0	1.1323	1	0.867	0
RPL28	0	1.12605	1	0.989	0
RPL24	0	1.12598	1	0.865	0
PGAM1	0	1.12194	0.916	0.182	0
NHP2L1	0	1.12074	0.936	0.239	0
BTF3	0	1.11961	0.998	0.745	0
SRM	0	1.11826	0.898	0.161	0
DUT	0	1.11796	0.787	0.132	0
RPS21	0	1.11784	1	0.969	0
NHP2	0	1.11775	0.934	0.19	0
MIR155HG	0	1.11553	0.82	0.094	0
RPS8	0	1.11532	1	0.996	0
ATP5J2	0	1.11061	0.958	0.28	0
RPL18A	0	1.10878	1	0.999	0
CBX3	0	1.1083	0.937	0.257	0
NACA	0	1.10707	1	0.804	0
EIF5B	0	1.10647	0.949	0.236	0
RPL36A	0	1.10325	1	0.957	0
EIF1	0	1.10284	0.998	0.779	0
FAU	0	1.10122	1	0.95	0
HNRNPA2B1	0	1.09969	0.961	0.317	0
RPL37	0	1.09673	1	0.99	0
LDHB	0	1.09466	0.99	0.629	0
SRSF3	0	1.09221	0.932	0.195	0
ATP5G1	0	1.08856	0.906	0.165	0
ATP5J	0	1.08822	0.93	0.256	0
COX6B1	0	1.08737	0.976	0.418	0
ATP5E	0	1.08708	1	0.728	0
SSBP1	0	1.08442	0.932	0.201	0
RPL14	0	1.08423	1	0.965	0
HINT1	0	1.08371	0.991	0.592	0
COX7B	0	1.08295	0.971	0.269	0
NOP10	0	1.0825	0.94	0.221	0
HMGN1	0	1.07701	0.948	0.26	0
RPL26	0	1.07612	1	0.995	0
NDUFA13	0	1.07553	0.966	0.31	0
RPS23	0	1.07504	1	0.996	0
PRMT1	0	1.07222	0.921	0.16	0
SNRPD2	0	1.07221	0.982	0.504	0
COX7C	0	1.07153	0.998	0.702	0
EIF5AL1	0	1.06914	0.782	0.084	0
RPL4	0	1.06855	0.999	0.817	0
NDUFAB1	0	1.06627	0.922	0.161	0
SUMO2	0	1.0654	0.953	0.312	0
TOMM5	0	1.06042	0.878	0.149	0
PARK7	0	1.06032	0.959	0.266	0
TIMM13	0	1.05843	0.908	0.168	0
RPS18	0	1.05781	1	1	0
ATP5L	0	1.05617	0.996	0.633	0
DYNLL1	0	1.05559	0.892	0.15	0
PHB	0	1.05549	0.904	0.137	0
MRPL23	0	1.05298	0.906	0.152	0
RPL8	0	1.05205	1	0.973	0
SLC25A6	0	1.05171	0.984	0.517	0
RPS9	0	1.05082	1	0.981	0
SEC61B	0	1.04993	0.932	0.185	0
MRPL20	0	1.04924	0.919	0.196	0
SERF2	0	1.04744	0.999	0.726	0
PRELID1	0	1.04604	0.915	0.204	0
RBX1	0	1.04518	0.956	0.28	0
MINOS1	0	1.04423	0.946	0.235	0
ARPC2	0	1.0437	0.968	0.352	0
CORO1A	0	1.04234	0.956	0.38	0
SH3BGRL3	0	1.04064	0.968	0.41	0
COX17	0	1.03961	0.917	0.148	0
IL32	0	1.03708	0.947	0.584	0
MT-CO2	0	1.03561	0.998	0.925	0
NDUFS5	0	1.03551	0.971	0.357	0
CCT6A	0	1.03462	0.866	0.11	0
COX5A	0	1.03283	0.904	0.156	0
CD3D	0	1.03098	0.978	0.476	0
UQCRH	0	1.03052	0.943	0.301	0
EEF1B2	0	1.03045	0.998	0.711	0
CALM2	0	1.03036	0.962	0.37	0
NFKBIA	0	1.03018	0.835	0.157	0
COX6C	0	1.02956	0.98	0.448	0
RPL9	0	1.02906	1	0.963	0
HMGN2	0	1.02885	0.928	0.329	0
IL2RA	0	1.02182	0.824	0.14	0
EMP3	0	1.02097	0.959	0.321	0
RPL7	0	1.02031	1	0.993	0
SEC61G	0	1.01981	0.933	0.22	0
CLIC1	0	1.0198	0.916	0.135	0
COX6A1P2	0	1.01849	0.921	0.167	0
RPS12	0	1.01495	1	0.999	0
UBA52	0	1.01105	1	0.913	0
NDUFS6	0	1.00871	0.905	0.152	0
DNAJA1	0	1.00724	0.884	0.137	0
EEF1A1	0	1.00701	1	0.992	0
RPS13	0	1.0065	1	0.994	0
HNRNPC	0	1.00592	0.932	0.275	0
RPS19	0	1.00522	1	1	0
PSMB6	0	1.00362	0.904	0.159	0
UBL5	0	1.00335	0.968	0.365	0
MT2A	0	1.0033	0.775	0.256	0
RPL22L1	0	0.999226	0.836	0.11	0
ATP5D	0	0.998325	0.943	0.289	0
C14orf2	0	0.995146	0.952	0.354	0
SHFM1	0	0.995136	0.924	0.204	0
LSM7	0	0.992878	0.907	0.233	0
RPL22	0	0.990651	0.999	0.897	0
EIF3J	0	0.990007	0.873	0.155	0
MT-ND1	0	0.987262	0.983	0.607	0
S100A6	0	0.987139	0.942	0.377	0
RPL18	0	0.986478	1	0.971	0
RPL19	0	0.986181	1	0.996	0
NDUFB2	0	0.984749	0.929	0.245	0
CD2	0	0.983818	0.919	0.257	0
RPL27A	0	0.983569	1	0.997	0
MRPL52	0	0.982847	0.884	0.141	0
PSMB8	0	0.9808	0.907	0.248	0
RPL10A	0	0.980035	1	0.97	0
NDUFV2	0	0.975712	0.907	0.191	0
SRSF9	0	0.975002	0.908	0.197	0
RPS3A	0	0.974063	1	0.989	0
PFDN2	0	0.973814	0.855	0.157	0
B2M	0	0.973133	1	1	0
PSMB9	0	0.972523	0.92	0.303	0
RPL13A	0	0.969865	1	1	0
SRSF7	0	0.967615	0.908	0.223	0
MT-ND5	0	0.966533	0.948	0.38	0
RPL36	0	0.965315	1	0.997	0
HNRNPAB	0	0.963447	0.815	0.128	0
ABRACL	0	0.962288	0.892	0.18	0
TMEM258	0	0.961858	0.95	0.332	0
MT-ND4	0	0.961144	0.995	0.781	0
GADD45GIP1	0	0.960807	0.885	0.179	0
COX8A	0	0.960089	0.9	0.176	0
CD7	0	0.957125	0.861	0.193	0
SNRPB2	0	0.956729	0.889	0.153	0
U2AF1	0	0.956279	0.879	0.208	0
RPS3	0	0.955743	1	0.996	0
METAP2	0	0.954686	0.864	0.158	0
ZNF706	0	0.952935	0.855	0.162	0
COX5B	0	0.951661	0.952	0.339	0
PSMB10	0	0.949769	0.922	0.198	0
PCNA	0	0.948729	0.721	0.07	0
PSMA5	0	0.948707	0.892	0.165	0
RPL38	0	0.947922	1	0.964	0
YWHAB	0	0.945998	0.925	0.244	0
NAP1L1	0	0.945113	0.949	0.395	0
RPS20	0	0.944524	1	0.977	0
LTA	0	0.944336	0.684	0.169	0
XRCC5	0	0.943254	0.874	0.162	0
TNFRSF4	0	0.94167	0.69	0.074	0
RPS15	0	0.941124	1	0.999	0
RPL41	0	0.94017	1	1	0
RPS6	0	0.940034	1	0.998	0
TPM3	0	0.937618	0.904	0.264	0
NUDC	0	0.937051	0.844	0.142	0
RPL12	0	0.936832	1	0.991	0
MT-ATP6	0	0.935283	0.996	0.707	0
MT-CO1	0	0.933103	0.997	0.905	0
PSMA4	0	0.931009	0.86	0.142	0
UQCR10	0	0.93014	0.92	0.286	0
PSMA1	0	0.928901	0.855	0.132	0
MZT2B	0	0.925377	0.924	0.32	0
ANP32B	0	0.925259	0.877	0.208	0
NEDD8	0	0.92521	0.922	0.24	0
H3F3A	0	0.924146	0.969	0.441	0
GNG5	0	0.9222	0.903	0.164	0
PSMA3	0	0.921957	0.848	0.139	0
LSM5	0	0.921143	0.859	0.175	0
CACYBP	0	0.919327	0.826	0.127	0
NDUFA11	0	0.915294	0.896	0.211	0
C19orf53	0	0.914836	0.909	0.256	0
SOD1	0	0.914461	0.96	0.422	0
SLC25A3	0	0.913317	0.87	0.191	0
HLA-A	0	0.913266	0.993	0.758	0
ATP5B	0	0.912199	0.88	0.249	0
HNRNPDL	0	0.911645	0.924	0.311	0
FAM96B	0	0.910781	0.857	0.124	0
AURKAIP1	0	0.910496	0.835	0.139	0
NDUFA1	0	0.910231	0.936	0.307	0
TCEB1	0	0.90939	0.835	0.122	0
VDAC1	0	0.90886	0.816	0.095	0
PGK1	0	0.90867	0.865	0.193	0
FTL	0	0.907915	1	0.957	0
MT-ND2	0	0.906397	0.992	0.685	0
DDX18	0	0.905017	0.892	0.259	0
HLA-B	0	0.903664	1	0.875	0
TOMM22	0	0.903373	0.842	0.112	0
RPLP2	0	0.902253	1	1	0
RPS4X	0	0.902162	1	0.993	0
DDX39A	0	0.899672	0.803	0.108	0
CHCHD10	0	0.898557	0.782	0.098	0
UBE2L3	0	0.898222	0.847	0.15	0
NBEAL1	0	0.897407	1	0.956	0
RPL35A	0	0.896886	1	0.996	0
CCND3	0	0.896451	0.801	0.118	0
RGS10	0	0.891942	0.879	0.268	0
EIF1AX	0	0.891557	0.812	0.14	0
ROMO1	0	0.890375	0.873	0.164	0
RPS28	0	0.889775	1	1	0
EIF3I	0	0.888604	0.849	0.133	0
RPS25	0	0.887512	1	0.997	0
LSM3	0	0.886808	0.853	0.152	0
TBCA	0	0.884935	0.911	0.293	0
CALM1	0	0.884829	0.936	0.363	0
NOP56	0	0.882401	0.801	0.123	0
NDUFB7	0	0.882307	0.867	0.159	0
MRPL41	0	0.881837	0.844	0.135	0
RPL36AL	0	0.88173	0.99	0.674	0
ARPC3	0	0.881341	0.948	0.334	0
PDCD5	0	0.879503	0.819	0.119	0
PSMB2	0	0.879067	0.82	0.109	0
RPL39	0	0.87652	1	0.998	0
HNRNPD	0	0.875379	0.843	0.168	0
DBI	0	0.874871	0.866	0.189	0
RPS27A	0	0.873876	1	0.999	0
CALR	0	0.871401	0.852	0.161	0
MYEOV2	0	0.867222	0.891	0.201	0
TXNDC17	0	0.867012	0.804	0.092	0
IFITM2	0	0.866608	0.867	0.236	0
LAMTOR5	0	0.864943	0.887	0.186	0
PPIB	0	0.863329	0.886	0.252	0
RBMX	0	0.863287	0.842	0.215	0
WDR43	0	0.862838	0.78	0.119	0
PPDPF	0	0.862716	0.937	0.373	0
SAP18	0	0.862349	0.913	0.273	0
PSMC3	0	0.86076	0.811	0.114	0
CCT2	0	0.860072	0.803	0.115	0
STMN1	0	0.859999	0.691	0.097	0
RPL11	0	0.859951	1	0.998	0
UBE2D3	0	0.859479	0.868	0.221	0
TUFM	0	0.859095	0.822	0.138	0
OST4	0	0.857921	0.984	0.572	0
SKP1	0	0.856536	0.925	0.35	0
RBM3	0	0.85372	0.895	0.221	0
SRSF2	0	0.853557	0.814	0.149	0
JTB	0	0.853283	0.815	0.179	0
RPL10	0	0.852042	1	1	0
NDUFA3	0	0.85171	0.915	0.317	0
RPL23A	0	0.850499	1	0.998	0
CCT3	0	0.850385	0.802	0.131	0
DEK	0	0.849733	0.711	0.1	0
ARPC1B	0	0.849232	0.859	0.194	0
MT-CO3	0	0.849133	1	0.942	0
NDUFC2	0	0.847909	0.864	0.154	0
MRPL51	0	0.846147	0.836	0.14	0
PSMD8	0	0.845409	0.828	0.143	0
GZMB	0	0.845325	0.919	0.504	0
MRPL12	0	0.844483	0.743	0.064	0
HMGA1	0	0.843644	0.745	0.099	0
FKBP1A	0	0.843229	0.809	0.109	0
COX4I1	0	0.842824	0.988	0.738	0
DAD1	0	0.840633	0.86	0.24	0
EEF2	0	0.8406	0.939	0.477	0
LY6E	0	0.839446	0.9	0.296	0
DCTPP1	0	0.838783	0.754	0.089	0
YWHAE	0	0.838301	0.804	0.118	0
CD74	0	0.837829	0.978	0.579	0
PPP1R14B	0	0.83711	0.74	0.062	0
RPS29	0	0.836726	1	1	0
CALM3	0	0.835603	0.844	0.159	0
POLR2I	0	0.834918	0.812	0.151	0
CMSS1	0	0.834845	0.748	0.074	0
NDUFB9	0	0.834776	0.87	0.259	0
SF3B5	0	0.83388	0.842	0.195	0
MAGOH	0	0.831105	0.818	0.133	0
HNRNPK	0	0.830848	0.9	0.285	0
PSMB7	0	0.828935	0.822	0.142	0
ILF2	0	0.827233	0.772	0.117	0
HLA-C	0	0.825191	0.996	0.803	0
PSMB5	0	0.824006	0.748	0.098	0
GPX4	0	0.823735	0.858	0.254	0
PRDX2	0	0.822304	0.838	0.208	0
LINC00152	0	0.821557	0.675	0.034	0
SF3B14	0	0.820871	0.848	0.174	0
DUSP2	0	0.818898	0.606	0.06	0
NSA2	0	0.818313	0.796	0.152	0
CCT8	0	0.818272	0.785	0.115	0
GUK1	0	0.818149	0.858	0.196	0
C11orf31	0	0.817954	0.825	0.207	0
CCT5	0	0.81739	0.781	0.108	0
EIF3K	0	0.817381	0.908	0.375	0
TIMM8B	0	0.8156	0.789	0.112	0
RPL13	0	0.814618	1	1	0
NDUFA6	0	0.812815	0.81	0.129	0
BATF	0	0.811846	0.738	0.081	0
CNBP	0	0.809374	0.908	0.353	0
NDUFB3	0	0.808693	0.778	0.122	0
ATP5G2	0	0.80825	0.961	0.534	0
RPL3	0	0.807582	1	0.995	0
NDUFB1	0	0.807397	0.874	0.279	0
SPCS1	0	0.807092	0.851	0.227	0
PDAP1	0	0.807057	0.766	0.098	0
CCDC85B	0	0.80703	0.779	0.152	0
RSL1D1	0	0.806215	0.855	0.221	0
CCT4	0	0.805726	0.764	0.114	0
PTGES3	0	0.805189	0.805	0.139	0
HSP90B1	0	0.8048	0.845	0.207	0
NDUFB11	0	0.804263	0.877	0.246	0
ZNF593	0	0.802226	0.74	0.068	0
CYBA	0	0.802193	0.948	0.473	0
EDF1	0	0.801103	0.913	0.338	0
NOL7	0	0.79999	0.763	0.126	0
MT1X	0	0.798996	0.765	0.121	0
GTF3C6	0	0.798846	0.788	0.096	0
DRAP1	0	0.798757	0.847	0.21	0
HNRNPU	0	0.798499	0.799	0.172	0
FBL	0	0.796247	0.857	0.234	0
GTF2A2	0	0.795417	0.789	0.126	0
C19orf70	0	0.795406	0.834	0.188	0
MRPS34	0	0.794341	0.772	0.122	0
NPM3	0	0.794197	0.711	0.07	0
TMSB4X	0	0.791971	1	1	0
ENY2	0	0.790664	0.81	0.134	0
ATP5C1	0	0.790537	0.793	0.124	0
ATPIF1	0	0.78885	0.817	0.199	0
EIF6	0	0.788046	0.762	0.109	0
MANF	0	0.785603	0.753	0.105	0
SNRPD3	0	0.785399	0.778	0.123	0
TALDO1	0	0.784856	0.773	0.123	0
MYL12B	0	0.783661	0.926	0.351	0
EEF1E1	0	0.783113	0.73	0.071	0
CIB1	0	0.779774	0.809	0.18	0
PSMD7	0	0.77771	0.76	0.099	0
SRRM1	0	0.776434	0.841	0.242	0
BOLA3	0	0.776017	0.737	0.069	0
EBNA1BP2	0	0.773397	0.712	0.067	0
GSTO1	0	0.773214	0.762	0.102	0
STRA13	0	0.773118	0.716	0.068	0
RPL21	0	0.772967	1	1	0
ABCF1	0	0.77294	0.772	0.117	0
C11orf58	0	0.772906	0.855	0.243	0
C11orf48	0	0.770922	0.756	0.104	0
FTH1	0	0.770918	1	0.945	0
BANF1	0	0.770362	0.796	0.131	0
GNL3	0	0.769638	0.731	0.109	0
UBC	0	0.767196	0.888	0.32	0
CFLAR	0	0.767026	0.73	0.118	0
IMPDH2	0	0.766936	0.745	0.113	0
C17orf89	0	0.766868	0.759	0.126	0
SNRPA1	0	0.766777	0.736	0.114	0
ANAPC11	0	0.766761	0.778	0.118	0
ATP6V0E1	0	0.765829	0.864	0.232	0
NDUFB6	0	0.765774	0.771	0.097	0
SSR4	0	0.765746	0.894	0.299	0
MRP63	0	0.765642	0.806	0.159	0
RPS14	0	0.764985	1	0.999	0
ARPC5L	0	0.76493	0.771	0.099	0
DKC1	0	0.763264	0.725	0.085	0
PHPT1	0	0.762223	0.764	0.089	0
RPL32	0	0.760866	1	0.999	0
HNRNPF	0	0.760182	0.796	0.142	0
MRPS18C	0	0.759509	0.752	0.11	0
CYC1	0	0.757884	0.726	0.092	0
GTF3A	0	0.757514	0.813	0.222	0
RPS17	0	0.757241	0.847	0.222	0
GNG8	0	0.757181	0.511	0.017	0
HLA-E	0	0.756279	0.952	0.584	0
CCND2	0	0.756033	0.701	0.087	0
NDUFB10	0	0.755977	0.786	0.149	0
TPT1	0	0.755455	1	0.93	0
RPL31	0	0.751963	1	0.996	0
MRPL14	0	0.751888	0.736	0.091	0
HNRNPA3	0	0.751199	0.794	0.161	0
LSM4	0	0.748651	0.736	0.116	0
ST13	0	0.74833	0.825	0.227	0
LSM6	0	0.747944	0.771	0.123	0
SDF2L1	0	0.74683	0.749	0.115	0
TCP1	0	0.746095	0.727	0.094	0
SRGN	0	0.744073	0.764	0.17	0
POLR2F	0	0.743637	0.744	0.098	0
RPA3	0	0.743501	0.731	0.092	0
C16orf13	0	0.742776	0.749	0.115	0
SIVA1	0	0.742551	0.714	0.139	0
NUTF2	0	0.742379	0.745	0.104	0
DDX1	0	0.742289	0.743	0.095	0
MRPS12	0	0.741596	0.713	0.079	0
NOP16	0	0.740754	0.697	0.07	0
MDH2	0	0.740407	0.77	0.123	0
PCBP1	0	0.740256	0.87	0.26	0
UQCRFS1	0	0.737624	0.77	0.133	0
NMT1	0	0.736966	0.779	0.156	0
NDUFB4	0	0.736683	0.821	0.201	0
STOML2	0	0.736532	0.696	0.079	0
SSSCA1	0	0.734959	0.708	0.077	0
RAC2	0	0.734793	0.825	0.191	0
NDUFA2	0	0.732297	0.775	0.149	0
MRPS21	0	0.731976	0.808	0.201	0
LSM2	0	0.731762	0.731	0.09	0
RAC1	0	0.730822	0.761	0.142	0
KRTCAP2	0	0.730046	0.838	0.225	0
TAF9	0	0.728517	0.738	0.102	0
RPS15A	0	0.728063	1	0.998	0
GPATCH4	0	0.726436	0.676	0.06	0
C14orf166	0	0.726222	0.791	0.156	0
TAGLN2	0	0.725444	0.768	0.158	0
PSMD14	0	0.724926	0.709	0.069	0
RPL30	0	0.724789	1	0.991	0
SSB	0	0.724096	0.763	0.148	0
ATP5O	0	0.724085	0.852	0.297	0
CSNK2B	0	0.723921	0.716	0.101	0
BZW1	0	0.721891	0.73	0.1	0
SUPT16H	0	0.721111	0.685	0.078	0
CCT7	0	0.719816	0.716	0.114	0
ATP6V0B	0	0.715269	0.722	0.122	0
TXNL4A	0	0.715063	0.721	0.109	0
CDK4	0	0.71494	0.668	0.071	0
ATP5A1	0	0.713508	0.803	0.206	0
SNRPC	0	0.711086	0.747	0.113	0
MT-ND4L	0	0.709149	0.887	0.347	0
TOMM40	0	0.707993	0.649	0.064	0
C8orf59	0	0.706758	0.763	0.148	0
DDX5	0	0.706393	0.942	0.478	0
PPP1CA	0	0.706029	0.763	0.165	0
PEBP1	0	0.704858	0.764	0.181	0
PHB2	0	0.70428	0.7	0.103	0
DDX24	0	0.701528	0.79	0.244	0
PSMC5	0	0.701295	0.735	0.128	0
XRCC6	0	0.701238	0.766	0.154	0
COTL1	0	0.699818	0.706	0.115	0
YWHAQ	0	0.699059	0.707	0.09	0
CD27	0	0.699009	0.687	0.169	0
LAGE3	0	0.697325	0.703	0.096	0
VDAC2	0	0.695946	0.726	0.113	0
SON	0	0.694673	0.913	0.436	0
ATOX1	0	0.694664	0.697	0.079	0
PET100	0	0.694471	0.828	0.249	0
TYMP	0	0.694291	0.707	0.133	0
COX16	0	0.693819	0.73	0.11	0
EIF3M	0	0.693658	0.781	0.202	0
PSMC1	0	0.693615	0.693	0.093	0
NDUFS8	0	0.693458	0.713	0.133	0
TOMM7	0	0.692408	0.965	0.654	0
EEF1D	0	0.692365	0.981	0.745	0
MRPS26	0	0.691504	0.643	0.084	0
PCBP2	0	0.69129	0.82	0.28	0
HSD17B10	0	0.689911	0.69	0.092	0
STAT1	0	0.689518	0.77	0.207	0
UQCC2	0	0.689394	0.698	0.081	0
NAA10	0	0.689086	0.679	0.081	0
PRDX5	0	0.68908	0.749	0.156	0
GPX1	0	0.687998	0.759	0.167	0
YWHAZ	0	0.687857	0.836	0.26	0
UQCRB	0	0.687325	0.961	0.645	0
TUBB4B	0	0.687322	0.655	0.057	0
C19orf43	0	0.687195	0.794	0.222	0
CKS1B	0	0.686677	0.606	0.042	0
BRK1	0	0.686331	0.794	0.207	0
TAP1	0	0.685946	0.708	0.114	0
ADRM1	0	0.685689	0.709	0.092	0
RHOA	0	0.685561	0.769	0.182	0
C4orf48	0	0.685451	0.716	0.085	0
UXT	0	0.685303	0.825	0.282	0
LYAR	0	0.684911	0.643	0.059	0
NDUFA12	0	0.683835	0.811	0.207	0
COPE	0	0.682887	0.762	0.176	0
C9orf16	0	0.682832	0.76	0.169	0
SVIP	0	0.682427	0.734	0.209	0
CDC42	0	0.681421	0.795	0.227	0
RBM39	0	0.681308	0.815	0.25	0
MYL12A	0	0.679766	0.931	0.512	0
ANP32A	0	0.67937	0.698	0.112	0
POLR2H	0	0.679183	0.657	0.068	0
NDUFS7	0	0.677563	0.697	0.114	0
NOP58	0	0.675006	0.708	0.109	0
C8orf33	0	0.674964	0.667	0.105	0
IMP4	0	0.674914	0.674	0.079	0
UBE2I	0	0.673202	0.732	0.154	0
ATP5F1	0	0.672719	0.714	0.121	0
EEF1G	0	0.672708	0.851	0.32	0
TMEM147	0	0.672164	0.673	0.104	0
UBE2N	0	0.671403	0.737	0.1	0
GRPEL1	0	0.671333	0.676	0.082	0
PFDN6	0	0.667886	0.662	0.078	0
RPS19BP1	0	0.667106	0.694	0.118	0
NDUFAF3	0	0.666537	0.729	0.137	0
SRI	0	0.666123	0.708	0.111	0
RRP7A	0	0.663323	0.653	0.069	0
TIMM10	0	0.662554	0.689	0.088	0
WARS	0	0.662516	0.748	0.172	0
AC017002.1	0	0.660632	0.519	0.026	0
SRRM2	0	0.660278	0.796	0.238	0
MRPL11	0	0.659898	0.666	0.081	0
NDUFC1	0	0.659229	0.74	0.159	0
RBM17	0	0.658612	0.663	0.092	0
DSTN	0	0.658461	0.701	0.103	0
TRAPPC2L	0	0.658139	0.68	0.084	0
PABPC1	0	0.657571	0.967	0.648	0
CD63	0	0.657505	0.711	0.119	0
NASP	0	0.656472	0.634	0.061	0
ATP5EP2	0	0.65643	0.77	0.189	0
PDIA3	0	0.65541	0.736	0.16	0
UBE2L6	0	0.653363	0.733	0.141	0
POLR2E	0	0.653311	0.673	0.086	0
MRPL3	0	0.652624	0.645	0.063	0
PSMC4	0	0.652305	0.658	0.071	0
EIF5	0	0.652173	0.686	0.133	0
CKS2	0	0.651804	0.58	0.042	0
SRP9	0	0.651613	0.711	0.144	0
IRF1	0	0.650715	0.702	0.174	0
BRIX1	0	0.650585	0.652	0.078	0
EIF3G	0	0.649904	0.769	0.223	0
MRPS7	0	0.649295	0.659	0.088	0
S100A11	0	0.648804	0.77	0.206	0
TMA16	0	0.64805	0.61	0.051	0
MRTO4	0	0.647876	0.658	0.065	0
MTDH	0	0.644773	0.701	0.133	0
KPNB1	0	0.642295	0.66	0.101	0
TRAPPC1	0	0.642028	0.741	0.148	0
SERP1	0	0.641155	0.783	0.252	0
NOLC1	0	0.640298	0.653	0.098	0
CSTB	0	0.639244	0.753	0.19	0
ZC3H15	0	0.636262	0.708	0.122	0
HDDC2	0	0.635731	0.668	0.09	0
HSPB1	0	0.634481	0.628	0.103	0
EIF2S1	0	0.631689	0.639	0.066	0
ATP5H	0	0.629569	0.757	0.195	0
MRPL33	0	0.629207	0.711	0.14	0
NIFK	0	0.628613	0.645	0.09	0
KTN1	0	0.627701	0.725	0.171	0
PWP1	0	0.627091	0.649	0.073	0
KRT10	0	0.627015	0.739	0.193	0
MORF4L1	0	0.626721	0.772	0.252	0
LRRFIP1	0	0.625245	0.702	0.133	0
GHITM	0	0.62493	0.683	0.123	0
PARP1	0	0.624491	0.636	0.096	0
BAX	0	0.624395	0.676	0.132	0
PPM1G	0	0.623695	0.612	0.065	0
DNMT1	0	0.623386	0.593	0.08	0
MRPL1	0	0.623152	0.604	0.048	0
ARF1	0	0.623084	0.693	0.127	0
EIF3F	0	0.621969	0.813	0.293	0
POLR2J	0	0.621767	0.668	0.106	0
HSPA9	0	0.621715	0.629	0.078	0
BUD31	0	0.620294	0.676	0.088	0
HNRNPA1L2	0	0.618875	0.651	0.087	0
TIMM17A	0	0.618613	0.619	0.066	0
TRA2B	0	0.618466	0.77	0.209	0
LMAN1	0	0.618306	0.644	0.072	0
CHMP2A	0	0.617722	0.682	0.105	0
ARF6	0	0.617416	0.702	0.118	0
DNAJC8	0	0.616741	0.706	0.149	0
MRPL4	0	0.615283	0.626	0.058	0
AP2S1	0	0.614483	0.68	0.109	0
RPL26L1	0	0.614236	0.607	0.056	0
RPS27L	0	0.614083	0.723	0.194	0
POLR3K	0	0.613547	0.581	0.053	0
MRPL32	0	0.612873	0.659	0.078	0
CLTA	0	0.61231	0.659	0.11	0
MRPS15	0	0.61191	0.631	0.067	0
PSMD4	0	0.61164	0.693	0.121	0
ACP1	0	0.610451	0.644	0.109	0
VAMP8	0	0.610284	0.735	0.173	0
C19orf10	0	0.60938	0.693	0.115	0
APEX1	0	0.609332	0.665	0.128	0
C20orf24	0	0.608825	0.652	0.091	0
PSMD13	0	0.607527	0.628	0.082	0
POLR2K	0	0.607194	0.618	0.068	0
COX20	0	0.606795	0.639	0.074	0
RAD23A	0	0.606	0.634	0.104	0
PRDX3	0	0.604773	0.625	0.084	0
MZT2A	0	0.603849	0.684	0.137	0
MRPL13	0	0.603634	0.623	0.056	0
RNF181	0	0.601296	0.684	0.106	0
SYNCRIP	0	0.60098	0.619	0.076	0
ATP1B3	0	0.600494	0.582	0.051	0
IFI16	0	0.599829	0.688	0.167	0
TMEM208	0	0.59831	0.62	0.065	0
LINC00116	0	0.598304	0.599	0.093	0
ARHGDIA	0	0.597493	0.656	0.122	0
CORO1B	0	0.596929	0.5	0.047	0
PIM3	0	0.596519	0.543	0.061	0
BLOC1S1	0	0.594831	0.637	0.108	0
SNF8	0	0.594646	0.622	0.071	0
PRRC2C	0	0.594308	0.717	0.184	0
C19orf24	0	0.594056	0.62	0.087	0
CCDC124	0	0.592474	0.606	0.063	0
SSNA1	0	0.592465	0.636	0.088	0
MCM7	0	0.592145	0.566	0.059	0
TMBIM6	0	0.591484	0.745	0.188	0
CNPY2	0	0.591353	0.644	0.099	0
MRPS16	0	0.590826	0.628	0.069	0
THOC7	0	0.590744	0.64	0.087	0
RSL24D1	0	0.590733	0.715	0.18	0
MRPL21	0	0.589437	0.612	0.069	0
RNPS1	0	0.589289	0.659	0.119	0
AIMP1	0	0.588895	0.654	0.093	0
FKBP11	0	0.588438	0.626	0.111	0
AHSA1	0	0.585009	0.608	0.066	0
MRPS23	0	0.583992	0.602	0.069	0
HNRNPR	0	0.583523	0.635	0.09	0
MDH1	0	0.582929	0.614	0.085	0
MRPL18	0	0.582608	0.605	0.074	0
MRPL17	0	0.582337	0.578	0.053	0
STIP1	0	0.581116	0.634	0.088	0
MRPL22	0	0.580875	0.62	0.068	0
CDV3	0	0.580871	0.598	0.087	0
ATP6V1F	0	0.580537	0.689	0.146	0
SELK	0	0.57985	0.688	0.157	0
MTHFD2	0	0.579747	0.61	0.082	0
PDIA6	0	0.579579	0.623	0.086	0
PFDN5	0	0.579577	0.989	0.846	0
MITD1	0	0.57914	0.61	0.088	0
DDIT4	0	0.578891	0.475	0.044	0
POLR2G	0	0.57707	0.624	0.098	0
VPS29	0	0.576717	0.627	0.1	0
PRR13	0	0.576518	0.708	0.161	0
RWDD1	0	0.576367	0.653	0.134	0
WDR83OS	0	0.575647	0.689	0.145	0
CISD1	0	0.574022	0.575	0.044	0
SPCS2	0	0.573977	0.697	0.157	0
H2AFV	0	0.572617	0.604	0.108	0
FAM136A	0	0.572509	0.581	0.053	0
MRPL55	0	0.572203	0.604	0.081	0
DDX46	0	0.571305	0.631	0.126	0
EMG1	0	0.571131	0.578	0.076	0
SUMO1	0	0.571015	0.675	0.122	0
ILF3	0	0.570292	0.602	0.109	0
METTL5	0	0.570249	0.588	0.068	0
ACTR3	0	0.569337	0.649	0.104	0
GGCT	0	0.56926	0.557	0.045	0
MRPS24	0	0.569129	0.619	0.08	0
RNASEH2C	0	0.567835	0.61	0.074	0
SFPQ	0	0.567756	0.605	0.093	0
SDHB	0	0.567221	0.599	0.071	0
FKBP2	0	0.566932	0.634	0.105	0
PLP2	0	0.56665	0.569	0.056	0
TCEA1	0	0.565868	0.618	0.087	0
HYPK	0	0.565612	0.579	0.045	0
NAA20	0	0.565042	0.604	0.09	0
HN1	0	0.564253	0.579	0.059	0
ARL2	0	0.56374	0.604	0.08	0
PSMA6	0	0.563629	0.595	0.08	0
NDUFS3	0	0.562295	0.613	0.076	0
AP2B1	0	0.561111	0.645	0.116	0
SEC11C	0	0.560567	0.615	0.079	0
MAGOHB	0	0.560026	0.572	0.059	0
EXOSC8	0	0.558458	0.583	0.078	0
PSMD11	0	0.557469	0.589	0.069	0
CDC37	0	0.557409	0.621	0.107	0
GSPT1	0	0.556813	0.592	0.073	0
GTPBP4	0	0.556756	0.557	0.049	0
IRF8	0	0.556257	0.454	0.032	0
RPL34	0	0.555315	1	0.999	0
UBE2S	0	0.554347	0.505	0.039	0
PMF1	0	0.554169	0.571	0.063	0
KIAA0020	0	0.553437	0.576	0.055	0
BOLA2B	0	0.553395	0.548	0.036	0
PSMD6	0	0.553214	0.59	0.07	0
SOCS1	0	0.552898	0.507	0.051	0
EIF3A	0	0.552751	0.593	0.09	0
FDPS	0	0.552152	0.579	0.077	0
FAM162A	0	0.550896	0.625	0.093	0
TMEM14B	0	0.549182	0.641	0.125	0
TMEM160	0	0.548918	0.615	0.101	0
TMED9	0	0.548416	0.627	0.099	0
NCBP2	0	0.548255	0.594	0.077	0
PRKDC	0	0.547445	0.556	0.073	0
TXN2	0	0.546331	0.571	0.072	0
CBX6	0	0.546185	0.541	0.062	0
ANP32E	0	0.545076	0.565	0.075	0
EIF4G2	0	0.54479	0.597	0.093	0
HSBP1	0	0.544421	0.604	0.078	0
TTC1	0	0.544252	0.599	0.089	0
SSRP1	0	0.544038	0.549	0.06	0
CCDC167	0	0.544029	0.565	0.057	0
DTYMK	0	0.543284	0.516	0.035	0
NUDT1	0	0.54265	0.531	0.048	0
FRG1	0	0.542217	0.626	0.116	0
VDAC3	0	0.542066	0.6	0.078	0
MRPL54	0	0.540926	0.612	0.098	0
DNAJC2	0	0.540446	0.543	0.056	0
PRDX4	0	0.540305	0.536	0.056	0
MRPL47	0	0.538334	0.566	0.053	0
NDUFA9	0	0.538129	0.57	0.054	0
TMCO1	0	0.537993	0.626	0.09	0
PSMB4	0	0.53749	0.576	0.077	0
SLBP	0	0.5367	0.515	0.057	0
TPRKB	0	0.535793	0.588	0.067	0
RER1	0	0.534715	0.588	0.077	0
TARS	0	0.533941	0.54	0.053	0
POLE3	0	0.532896	0.568	0.07	0
H2AFY	0	0.532383	0.569	0.087	0
CITE-CD27-GCACTCCTGCATGTA	0	0.531658	1	1	0
CWC15	0	0.531556	0.588	0.095	0
TSTA3	0	0.531482	0.539	0.049	0
CDC123	0	0.530844	0.566	0.082	0
CLPP	0	0.529797	0.561	0.061	0
GINS2	0	0.528778	0.467	0.021	0
RPS27	0	0.528461	1	1	0
PPP4C	0	0.527604	0.605	0.096	0
ENSA	0	0.527391	0.607	0.107	0
RAB7A	0	0.526723	0.596	0.095	0
SFXN1	0	0.52645	0.572	0.084	0
LAP3	0	0.523717	0.568	0.065	0
MRPS6	0	0.523427	0.597	0.092	0
NUDT5	0	0.52295	0.522	0.047	0
HSPB11	0	0.522532	0.559	0.066	0
ETFB	0	0.521914	0.552	0.08	0
POLD2	0	0.521783	0.539	0.049	0
TOP1	0	0.521713	0.562	0.051	0
FAM207A	0	0.521565	0.517	0.043	0
EIF4A3	0	0.521238	0.542	0.061	0
CITE-CD28-ATTCTGTCTTTCCCA	0	0.520944	1	1	0
TRAPPC4	0	0.520664	0.567	0.083	0
SDHC	0	0.520174	0.596	0.086	0
PDCD11	0	0.518051	0.524	0.048	0
GLRX3	0	0.517408	0.544	0.053	0
ITGB1BP1	0	0.516969	0.538	0.054	0
LAMTOR2	0	0.516763	0.572	0.079	0
PHF5A	0	0.516151	0.531	0.055	0
PUF60	0	0.516075	0.567	0.085	0
TUBA1C	0	0.513897	0.524	0.038	0
CD320	0	0.513825	0.523	0.055	0
PDCD2	0	0.511408	0.548	0.076	0
UTP11L	0	0.511326	0.508	0.045	0
KARS	0	0.511111	0.586	0.088	0
MRPL36	0	0.51078	0.555	0.063	0
CEBPZ	0	0.50926	0.581	0.09	0
EMC6	0	0.508984	0.545	0.072	0
CISD3	0	0.508312	0.513	0.053	0
VAPA	0	0.508059	0.589	0.093	0
TMEM126A	0	0.507267	0.53	0.047	0
WDR74	0	0.50723	0.536	0.064	0
RPF2	0	0.505475	0.523	0.049	0
IFI35	0	0.503473	0.543	0.075	0
CREM	0	0.501176	0.512	0.041	0
RARS	0	0.501104	0.52	0.047	0
PSMD2	0	0.500362	0.543	0.062	0
FKBP4	0	0.499671	0.505	0.045	0
C19orf48	0	0.49953	0.494	0.05	0
CISD2	0	0.49691	0.511	0.038	0
ITGAE	0	0.495123	0.499	0.048	0
POP7	0	0.494181	0.481	0.042	0
DNAJC15	0	0.493592	0.517	0.057	0
NDUFAF4	0	0.493423	0.528	0.064	0
NDUFV1	0	0.493331	0.533	0.068	0
GAR1	0	0.491532	0.486	0.041	0
MRPL27	0	0.49135	0.534	0.058	0
EXOSC4	0	0.491103	0.497	0.039	0
PNO1	0	0.490837	0.489	0.034	0
YIF1A	0	0.488376	0.525	0.052	0
MRPL28	0	0.486792	0.527	0.051	0
GMNN	0	0.486555	0.447	0.02	0
PSMD1	0	0.48641	0.517	0.057	0
FUOM	0	0.485813	0.489	0.03	0
ADSL	0	0.485189	0.522	0.06	0
GTF2H5	0	0.484838	0.516	0.055	0
MRPL15	0	0.484462	0.516	0.047	0
LSM1	0	0.482048	0.536	0.063	0
TIMM44	0	0.481429	0.477	0.039	0
PAK1IP1	0	0.480006	0.516	0.041	0
SLC25A39	0	0.479635	0.505	0.054	0
PSMC2	0	0.479308	0.516	0.058	0
SRPK1	0	0.478579	0.506	0.05	0
RRP15	0	0.474426	0.514	0.051	0
TXNL1	0	0.472	0.514	0.06	0
CHCHD7	0	0.470678	0.523	0.063	0
STRAP	0	0.465199	0.505	0.057	0
FIBP	0	0.459611	0.486	0.047	0
SNRNP25	0	0.4577	0.471	0.035	0
SNHG15	0	0.454655	0.489	0.05	0
MCTS1	0	0.453905	0.499	0.041	0
ODC1	0	0.452497	0.475	0.042	0
MTCH2	0	0.452221	0.475	0.04	0
DCUN1D5	0	0.451895	0.447	0.034	0
TMEM167A	0	0.448872	0.492	0.046	0
SMS	0	0.447631	0.446	0.034	0
MTFP1	0	0.447435	0.462	0.034	0
PAM16	0	0.447347	0.457	0.035	0
DESI1	0	0.446136	0.439	0.028	0
HPRT1	0	0.444072	0.476	0.038	0
FAM195A	0	0.443963	0.442	0.027	0
NTMT1	0	0.438766	0.487	0.047	0
COPRS	0	0.437847	0.427	0.028	0
EXOSC3	0	0.433701	0.46	0.039	0
CBWD1	0	0.431884	0.446	0.032	0
TFDP1	0	0.422597	0.435	0.028	0
MALAT1	0	0.304915	1	1	0
WBSCR22	1.21628e-307	0.495843	0.569	0.088	2.08519e-303
C12orf57	2.11792e-307	0.635499	0.72	0.198	3.63096e-303
LAMTOR1	6.80281e-307	0.490955	0.586	0.096	1.16627e-302
BUB3	1.49178e-306	0.496932	0.56	0.085	2.5575e-302
TUBA4A	1.8921e-306	0.4909	0.542	0.075	3.24382e-302
OSTC	2.66039e-306	0.539083	0.624	0.122	4.56098e-302
NDUFAF2	2.74383e-306	0.469337	0.503	0.057	4.70401e-302
LCP1	4.26157e-306	0.542275	0.636	0.13	7.30603e-302
2020-09-07	3.37745e-305	0.571232	0.712	0.188	5.7903e-301
MRPL34	6.89754e-305	0.489216	0.541	0.076	1.18251e-300
MCM5	1.01139e-304	0.450731	0.429	0.031	1.73393e-300
HIST1H4C	1.15371e-304	0.94775	0.692	0.181	1.97792e-300
UBE2D2	1.20108e-304	0.593518	0.687	0.169	2.05913e-300
SRP19	2.02804e-304	0.437868	0.512	0.061	3.47687e-300
PPIH	2.64413e-304	0.459565	0.464	0.043	4.5331e-300
RNF145	4.97423e-304	0.50698	0.554	0.083	8.52781e-300
RGCC	4.98498e-304	0.974055	0.637	0.148	8.54625e-300
HSPA5	1.31839e-303	0.560897	0.628	0.128	2.26025e-299
PSMD9	1.45433e-303	0.448744	0.463	0.043	2.4933e-299
NXT1	8.20329e-303	0.485148	0.513	0.064	1.40637e-298
UBE2T	1.26088e-302	0.456615	0.407	0.025	2.16166e-298
EIF3E	2.10538e-302	0.613454	0.816	0.311	3.60946e-298
THRAP3	2.28072e-302	0.562384	0.628	0.13	3.91006e-298
EIF3L	4.45264e-302	0.595799	0.73	0.213	7.6336e-298
MT-ND3	2.09531e-301	0.589078	0.985	0.851	3.59219e-297
SRP72	7.1468e-301	0.50019	0.539	0.077	1.22525e-296
PSMD12	8.9137e-301	0.438807	0.476	0.049	1.52816e-296
PAICS	1.5463e-299	0.493931	0.516	0.067	2.65098e-295
SYNGR2	1.67053e-299	0.525101	0.617	0.121	2.86396e-295
UCHL3	2.06061e-299	0.412588	0.436	0.035	3.5327e-295
SF3B2	2.93852e-299	0.537456	0.628	0.127	5.03779e-295
CYB5A	3.36923e-299	0.430028	0.444	0.038	5.77621e-295
SMC2	1.26696e-298	0.417364	0.402	0.024	2.17208e-294
PTPN6	1.0504e-297	0.49146	0.545	0.082	1.80081e-293
ELP5	1.33546e-297	0.44411	0.452	0.041	2.28951e-293
GMFG	6.23184e-297	0.599843	0.877	0.43	1.06839e-292
ARF5	2.16068e-296	0.495303	0.576	0.098	3.70427e-292
CHORDC1	1.1393e-295	0.418665	0.432	0.034	1.95321e-291
ISG20	1.8203e-295	0.718186	0.762	0.258	3.12072e-291
RPL7L1	3.46519e-295	0.512426	0.542	0.082	5.94073e-291
HIGD1A	3.59634e-295	0.420588	0.461	0.045	6.16557e-291
ABCE1	4.13228e-295	0.447875	0.47	0.049	7.08438e-291
NARS	4.33818e-295	0.522243	0.558	0.091	7.43737e-291
VBP1	6.15416e-295	0.436084	0.476	0.052	1.05507e-290
MRPS36	9.70435e-295	0.46741	0.523	0.071	1.66371e-290
HDAC2	1.06342e-294	0.465574	0.477	0.052	1.82313e-290
RBM25	1.43192e-294	0.547245	0.652	0.148	2.45488e-290
DPY30	2.65254e-294	0.50034	0.582	0.103	4.54752e-290
SUPT4H1	6.99908e-294	0.540564	0.588	0.108	1.19992e-289
HSPH1	9.55004e-294	0.430672	0.466	0.047	1.63726e-289
TRMT10C	1.23576e-293	0.45855	0.498	0.061	2.11859e-289
ARPC4	2.28832e-293	0.507713	0.545	0.085	3.92309e-289
RPF1	3.399e-293	0.464648	0.537	0.078	5.82724e-289
AK2	4.93218e-293	0.45695	0.491	0.058	8.45574e-289
SMIM4	2.40933e-292	0.446144	0.492	0.059	4.13056e-288
TRAP1	3.94741e-291	0.416443	0.453	0.044	6.76745e-287
EZR	5.83795e-291	0.50748	0.558	0.092	1.00086e-286
NDFIP2	1.21838e-290	0.383708	0.397	0.025	2.08879e-286
IMP3	1.92065e-290	0.527121	0.603	0.118	3.29275e-286
DENR	2.96186e-290	0.496867	0.497	0.063	5.07782e-286
SRA1	7.46029e-290	0.418949	0.465	0.049	1.27899e-285
RPA2	1.26886e-289	0.489358	0.545	0.085	2.17534e-285
TNFAIP8	3.88363e-289	0.533241	0.548	0.089	6.6581e-285
UFD1L	7.00889e-289	0.448949	0.498	0.063	1.2016e-284
SUMO3	8.99696e-289	0.49523	0.558	0.092	1.54244e-284
TSPO	1.40746e-288	0.556821	0.633	0.143	2.41294e-284
SLC38A5	1.93285e-288	0.389266	0.389	0.023	3.31367e-284
DNAJB11	2.03312e-288	0.452301	0.507	0.067	3.48558e-284
ESD	5.81887e-288	0.457182	0.508	0.068	9.97587e-284
LAMTOR4	6.45392e-288	0.581004	0.746	0.237	1.10646e-283
LSMD1	7.31942e-288	0.545787	0.587	0.11	1.25484e-283
HIGD2A	7.60673e-288	0.539899	0.682	0.174	1.3041e-283
PFDN4	1.11951e-287	0.495381	0.544	0.086	1.91928e-283
C11orf73	1.14699e-287	0.440444	0.484	0.057	1.9664e-283
CHMP5	1.17308e-287	0.433799	0.497	0.062	2.01112e-283
MT-CYB	3.74712e-287	0.575167	0.956	0.693	6.42406e-283
CCDC58	4.81435e-287	0.412414	0.414	0.031	8.25372e-283
LTB	6.51194e-287	1.02553	0.945	0.728	1.11641e-282
TIMM50	9.93994e-287	0.410587	0.45	0.044	1.7041e-282
RP11-345J4.5	3.15135e-286	0.403454	0.429	0.037	5.40267e-282
VCP	2.47374e-285	0.474338	0.552	0.091	4.24098e-281
PSMG1	3.93895e-285	0.40432	0.417	0.033	6.75294e-281
SELT	6.39544e-285	0.462146	0.55	0.089	1.09643e-280
NELFE	1.02566e-284	0.435869	0.485	0.059	1.75839e-280
CAPZB	1.70545e-284	0.527687	0.648	0.152	2.92382e-280
BCCIP	2.74797e-284	0.458288	0.511	0.071	4.71112e-280
MRPL19	4.44931e-284	0.401533	0.435	0.039	7.6279e-280
PDCD6	7.84719e-284	0.491741	0.606	0.121	1.34532e-279
CKLF	8.26834e-284	0.503798	0.546	0.091	1.41752e-279
HELLS	2.96818e-283	0.404969	0.332	0.008	5.08864e-279
DNAJC19	4.25183e-283	0.475223	0.56	0.097	7.28933e-279
KIAA0101	4.2657e-283	0.511202	0.361	0.016	7.31311e-279
TMEM70	5.8339e-283	0.415799	0.44	0.042	1.00016e-278
ZNRD1	1.04193e-282	0.44363	0.493	0.064	1.78628e-278
TPM4	2.35977e-282	0.466699	0.489	0.063	4.04558e-278
PPAN	4.29078e-282	0.406407	0.407	0.031	7.35611e-278
MCM3	1.28683e-281	0.431954	0.439	0.042	2.20614e-277
APOA1BP	2.05662e-281	0.451445	0.505	0.07	3.52586e-277
DNPH1	4.47753e-281	0.554376	0.638	0.149	7.67628e-277
SNRNP70	4.93686e-281	0.455844	0.482	0.06	8.46376e-277
SPCS3	5.5773e-281	0.429017	0.468	0.054	9.56172e-277
GDI2	5.88773e-281	0.475785	0.548	0.092	1.00939e-276
DNAJC9	7.88783e-281	0.456354	0.437	0.042	1.35229e-276
RUVBL1	8.28148e-281	0.427749	0.455	0.049	1.41978e-276
MEA1	8.52648e-281	0.431878	0.459	0.05	1.46178e-276
PTP4A2	1.01763e-280	0.536725	0.641	0.151	1.74462e-276
RABAC1	1.5451e-280	0.523327	0.64	0.149	2.64892e-276
ZCRB1	2.75628e-280	0.433543	0.469	0.055	4.72537e-276
IFRD2	3.68791e-280	0.419817	0.425	0.037	6.32255e-276
POP4	3.77508e-280	0.420484	0.451	0.047	6.47199e-276
MRPL37	1.68268e-279	0.408478	0.43	0.04	2.88479e-275
ZMAT2	3.47193e-279	0.455467	0.54	0.087	5.95227e-275
ZNHIT1	4.24236e-279	0.492719	0.572	0.106	7.27311e-275
SS18L2	1.53661e-278	0.498692	0.573	0.109	2.63436e-274
PPP1CC	2.1022e-278	0.458884	0.5	0.069	3.60402e-274
CDC26	8.89298e-278	0.478114	0.557	0.098	1.52461e-273
WDR18	1.69704e-277	0.398833	0.431	0.04	2.90941e-273
TFAM	3.68996e-277	0.45128	0.447	0.047	6.32607e-273
TSR3	4.17675e-277	0.443707	0.477	0.059	7.16062e-273
ETFA	6.08635e-277	0.419056	0.456	0.05	1.04344e-272
CDK2AP2	1.51267e-276	0.459357	0.532	0.085	2.59331e-272
NDUFA8	2.62598e-276	0.433898	0.486	0.063	4.50198e-272
ISG15	3.19015e-276	0.745614	0.785	0.289	5.4692e-272
BAG1	3.29127e-276	0.417774	0.46	0.052	5.64256e-272
U2SURP	3.38768e-276	0.506009	0.58	0.114	5.80783e-272
HNRNPA0	4.08757e-276	0.55484	0.637	0.156	7.00773e-272
G3BP1	1.12894e-275	0.464206	0.552	0.096	1.93545e-271
FIS1	2.07143e-275	0.507883	0.612	0.133	3.55125e-271
PSMG2	3.44249e-275	0.447793	0.508	0.074	5.9018e-271
SEC11A	3.63679e-275	0.445295	0.517	0.079	6.23491e-271
TAPBP	5.22476e-275	0.519938	0.627	0.144	8.95733e-271
KHDRBS1	5.28588e-275	0.511919	0.578	0.112	9.06212e-271
DNAJC7	7.42914e-275	0.460417	0.535	0.088	1.27365e-270
IRF4	1.28919e-274	0.471298	0.512	0.077	2.21019e-270
GADD45B	2.41586e-274	0.535613	0.508	0.076	4.14175e-270
DNLZ	4.25636e-274	0.405589	0.428	0.041	7.2971e-270
COA6	4.78397e-274	0.396373	0.438	0.044	8.20164e-270
NAA38	2.2533e-273	0.492747	0.576	0.112	3.86305e-269
TGFB1	2.44348e-273	0.424035	0.467	0.056	4.1891e-269
COX7A2L	2.47981e-273	0.488862	0.643	0.154	4.25138e-269
BAZ1A	2.49039e-273	0.528291	0.62	0.139	4.26952e-269
CITE-CD38-ATCCTTTGCCGTGTT	1.16214e-272	0.685904	1	1	1.99237e-268
SRSF11	2.41455e-272	0.548139	0.636	0.154	4.13951e-268
CHMP4B	2.95722e-271	0.447386	0.509	0.076	5.06986e-267
VRK1	3.25911e-271	0.392438	0.4	0.032	5.58743e-267
NDUFB5	7.16782e-271	0.447633	0.532	0.087	1.22885e-266
GBP2	7.97749e-271	0.504753	0.601	0.128	1.36766e-266
ECHS1	1.00434e-270	0.450259	0.489	0.067	1.72183e-266
TNFSF14	1.18083e-270	0.464694	0.369	0.022	2.02442e-266
COA3	1.34844e-270	0.400562	0.446	0.049	2.31177e-266
VIMP	1.71716e-270	0.443948	0.487	0.066	2.9439e-266
CD47	2.02857e-270	0.508194	0.594	0.126	3.47777e-266
FUNDC2	3.37939e-270	0.401299	0.465	0.056	5.79363e-266
SNHG9	3.69631e-270	0.551289	0.626	0.149	6.33696e-266
TMEM50A	1.14813e-269	0.454435	0.566	0.107	1.96835e-265
DPM2	1.35052e-269	0.408586	0.411	0.036	2.31533e-265
EIF3H	3.09437e-269	0.554649	0.777	0.286	5.30498e-265
ANAPC16	3.52006e-269	0.525555	0.667	0.177	6.0348e-265
MRPL24	6.89248e-269	0.420016	0.467	0.058	1.18165e-264
C7orf50	1.34996e-268	0.379617	0.422	0.04	2.31438e-264
LRRC59	2.5671e-268	0.37883	0.412	0.037	4.40104e-264
LTV1	2.98236e-268	0.379905	0.404	0.034	5.11296e-264
SDHD	4.1394e-268	0.451292	0.516	0.081	7.09659e-264
CCDC137	4.54021e-268	0.385747	0.402	0.033	7.78373e-264
UQCRC2	5.61837e-268	0.462951	0.532	0.089	9.63214e-264
RUVBL2	3.96644e-267	0.391473	0.418	0.039	6.80006e-263
ARL6IP4	4.24221e-267	0.567319	0.74	0.252	7.27284e-263
PRPF4B	4.55494e-267	0.432458	0.515	0.08	7.80898e-263
IFI27L2	7.43436e-267	0.431914	0.464	0.058	1.27455e-262
DCAF13	7.90854e-267	0.39788	0.413	0.038	1.35584e-262
TMEM126B	1.2816e-266	0.433484	0.499	0.073	2.19718e-262
CLSPN	1.65588e-266	0.359613	0.308	0.007	2.83884e-262
RPS17L	1.74233e-266	0.487392	0.528	0.09	2.98704e-262
SFT2D1	1.93271e-266	0.444952	0.488	0.069	3.31343e-262
MMADHC	4.14553e-266	0.428289	0.483	0.066	7.1071e-262
CMC2	4.82193e-266	0.387718	0.444	0.049	8.26671e-262
PYCR1	7.1576e-266	0.330804	0.335	0.014	1.2271e-261
AKR1A1	2.72541e-265	0.413273	0.482	0.066	4.67244e-261
PAPOLA	3.3607e-265	0.434551	0.514	0.081	5.76158e-261
MYC	3.58883e-265	0.629288	0.6	0.137	6.15268e-261
NONO	3.61716e-265	0.467898	0.532	0.091	6.20126e-261
TKT	4.31501e-265	0.446639	0.492	0.071	7.39765e-261
UBE2V2	1.12846e-264	0.412301	0.446	0.051	1.93464e-260
DPM1	1.26044e-264	0.434832	0.472	0.063	2.16089e-260
BSG	2.64909e-264	0.472728	0.55	0.102	4.5416e-260
ITPA	7.9624e-264	0.3757	0.422	0.042	1.36507e-259
AP2M1	9.48148e-264	0.450474	0.522	0.087	1.62551e-259
REEP5	1.03765e-263	0.380566	0.446	0.051	1.77895e-259
RRP9	1.08259e-263	0.3876	0.4	0.034	1.85599e-259
CAPZA1	1.09806e-263	0.436735	0.479	0.067	1.88251e-259
NFKB1	1.21335e-263	0.396327	0.395	0.033	2.08017e-259
TNIP2	1.34129e-262	0.377272	0.415	0.04	2.2995e-258
ALYREF	2.27505e-262	0.374333	0.377	0.027	3.90034e-258
OLA1	4.5104e-262	0.365669	0.402	0.035	7.73263e-258
UQCRC1	8.44424e-262	0.452865	0.519	0.086	1.44768e-257
MKKS	1.04362e-261	0.395317	0.43	0.046	1.78917e-257
NUCKS1	1.26736e-261	0.587274	0.66	0.183	2.17277e-257
SNRNP40	1.72654e-261	0.434959	0.468	0.063	2.95998e-257
CAMTA1	1.75645e-261	0.442485	0.502	0.078	3.01126e-257
PRPF40A	2.15662e-261	0.463005	0.498	0.077	3.69731e-257
DHX15	3.10753e-261	0.379675	0.404	0.037	5.32756e-257
BST2	3.87578e-261	0.554863	0.6	0.138	6.64464e-257
UFC1	5.70323e-261	0.465625	0.622	0.146	9.77761e-257
TBCB	1.44045e-260	0.464321	0.539	0.098	2.46952e-256
SAR1A	4.25435e-260	0.442472	0.508	0.082	7.29366e-256
CENPW	7.91229e-260	0.338282	0.309	0.008	1.35648e-255
CLTB	1.09917e-259	0.420219	0.473	0.065	1.88442e-255
MRPS10	1.8137e-259	0.391486	0.433	0.048	3.1094e-255
CHCHD1	2.55097e-259	0.401682	0.424	0.045	4.37339e-255
SSU72	6.71964e-259	0.524791	0.623	0.154	1.15201e-254
YRDC	9.12775e-259	0.398129	0.391	0.033	1.56486e-254
DYNLRB1	9.39255e-259	0.422378	0.523	0.088	1.61026e-254
TWISTNB	1.31054e-258	0.38067	0.416	0.042	2.24679e-254
MRPL50	1.94958e-258	0.394918	0.428	0.046	3.34237e-254
DCXR	2.42049e-258	0.461902	0.498	0.078	4.14969e-254
ISOC2	3.02426e-258	0.351191	0.374	0.027	5.18478e-254
NT5C	6.24191e-258	0.392033	0.431	0.048	1.07011e-253
ETHE1	8.13654e-258	0.384007	0.416	0.042	1.39493e-253
EPRS	1.1034e-257	0.398374	0.435	0.049	1.89168e-253
CHURC1	2.45465e-257	0.557639	0.701	0.223	4.20824e-253
RILPL2	3.15992e-256	0.39803	0.394	0.035	5.41737e-252
P4HB	7.13853e-256	0.433151	0.491	0.075	1.22383e-251
CLNS1A	8.43036e-256	0.4624	0.538	0.1	1.4453e-251
PMVK	1.01643e-255	0.353559	0.393	0.034	1.74256e-251
TOMM20	2.03133e-255	0.483942	0.579	0.125	3.48252e-251
RPP30	2.8604e-255	0.367973	0.38	0.03	4.90387e-251
CD3EAP	3.46232e-255	0.352268	0.351	0.021	5.9358e-251
MRPL16	5.20317e-255	0.415598	0.469	0.065	8.92032e-251
PIN1	6.80628e-255	0.439664	0.489	0.075	1.16687e-250
GRWD1	7.90509e-255	0.361951	0.398	0.037	1.35525e-250
TFRC	2.30912e-254	0.404401	0.435	0.051	3.95875e-250
C9orf142	3.51889e-254	0.479555	0.532	0.098	6.03278e-250
SLC3A2	4.76357e-254	0.459938	0.501	0.082	8.16667e-250
EIF4E	1.34598e-253	0.389698	0.433	0.05	2.30755e-249
RNH1	1.4868e-253	0.436575	0.516	0.089	2.54897e-249
TGS1	2.34256e-253	0.391582	0.447	0.056	4.01608e-249
TRIAP1	3.24595e-253	0.378779	0.414	0.043	5.56485e-249
MPHOSPH6	5.73022e-253	0.375261	0.387	0.033	9.82388e-249
BZW2	1.41306e-252	0.388644	0.426	0.048	2.42256e-248
PCMT1	1.58439e-252	0.396926	0.439	0.054	2.71627e-248
POLR1D	2.41821e-252	0.489014	0.561	0.116	4.14577e-248
PRDX6	4.1052e-252	0.468534	0.54	0.104	7.03795e-248
ATIC	4.4386e-252	0.405194	0.432	0.051	7.60954e-248
EXOSC1	2.86654e-251	0.409826	0.445	0.057	4.9144e-247
LMAN2	3.64328e-251	0.422045	0.518	0.09	6.24604e-247
CD69	2.10803e-250	0.518755	0.411	0.044	3.614e-246
EID1	2.12139e-250	0.472471	0.588	0.132	3.63692e-246
UBE2M	2.31578e-250	0.369111	0.364	0.027	3.97018e-246
ARPC5	3.25749e-250	0.494171	0.612	0.15	5.58464e-246
MAD2L1	4.32992e-250	0.337289	0.332	0.017	7.42321e-246
PSME3	5.88832e-250	0.399769	0.428	0.05	1.00949e-245
CHMP4A	7.1268e-250	0.470391	0.583	0.132	1.22182e-245
FERMT3	8.80572e-250	0.370968	0.404	0.041	1.50965e-245
DGUOK	9.27518e-250	0.472335	0.588	0.134	1.59014e-245
TIPIN	9.91565e-250	0.360185	0.366	0.028	1.69994e-245
EMC4	1.29812e-249	0.441412	0.499	0.082	2.2255e-245
FUS	1.97045e-249	0.522338	0.684	0.209	3.37815e-245
MPDU1	3.62073e-249	0.350048	0.365	0.027	6.20738e-245
RTF1	3.84453e-249	0.48177	0.603	0.143	6.59106e-245
GPI	4.01863e-249	0.420221	0.484	0.075	6.88955e-245
LLPH	1.79715e-248	0.38832	0.438	0.054	3.08104e-244
FEN1	2.15029e-248	0.362893	0.349	0.023	3.68646e-244
SH2D2A	3.55999e-248	0.366143	0.412	0.044	6.10324e-244
C4orf3	3.62221e-248	0.516493	0.714	0.241	6.20992e-244
PABPN1	5.15015e-248	0.418269	0.447	0.059	8.82942e-244
NOB1	5.19098e-248	0.397395	0.443	0.057	8.89941e-244
SMC3	5.23512e-248	0.444113	0.498	0.083	8.97509e-244
ACOT7	7.13229e-248	0.341804	0.342	0.021	1.22276e-243
RSRC2	9.97572e-248	0.504205	0.584	0.135	1.71024e-243
SARS	3.99484e-247	0.440718	0.542	0.107	6.84875e-243
MRPS33	4.52735e-247	0.461343	0.529	0.101	7.76169e-243
TRAPPC3	5.72899e-247	0.405903	0.461	0.066	9.82179e-243
RBPJ	9.56278e-247	0.432659	0.457	0.064	1.63944e-242
C9orf78	9.87078e-247	0.48759	0.579	0.131	1.69225e-242
SRSF4	1.90288e-246	0.390035	0.435	0.054	3.26229e-242
FARSA	2.68539e-246	0.417754	0.454	0.063	4.60383e-242
SNHG8	3.55248e-246	0.598735	0.753	0.286	6.09038e-242
CENPV	4.5983e-246	0.355741	0.352	0.024	7.88333e-242
EIF4EBP1	5.20619e-246	0.33629	0.336	0.019	8.9255e-242
MTX1	6.11863e-246	0.363077	0.392	0.038	1.04898e-241
CLEC2D	1.14584e-245	0.440043	0.476	0.074	1.96442e-241
CHEK1	1.34449e-245	0.305416	0.294	0.008	2.30499e-241
GNL2	3.23879e-245	0.318083	0.356	0.025	5.55258e-241
PTPN7	3.41349e-245	0.384031	0.427	0.051	5.85208e-241
GLRX5	6.49957e-245	0.414006	0.461	0.067	1.11429e-240
LSM10	8.065e-245	0.376159	0.437	0.056	1.38266e-240
IFITM1	1.30529e-244	0.594377	0.954	0.658	2.23779e-240
RPIA	1.63492e-244	0.383323	0.414	0.047	2.80291e-240
SRPRB	2.97337e-244	0.349588	0.392	0.038	5.09754e-240
DDX27	3.58628e-244	0.419806	0.453	0.064	6.14832e-240
TNF	4.34787e-244	0.52551	0.431	0.055	7.45399e-240
COPS6	5.02005e-244	0.441701	0.524	0.099	8.60637e-240
SLC25A11	9.44013e-244	0.36893	0.404	0.043	1.61842e-239
MRPL40	1.49749e-243	0.399485	0.428	0.053	2.56729e-239
RSRC1	1.94897e-243	0.44383	0.505	0.089	3.34131e-239
ECHDC1	2.26532e-243	0.347671	0.39	0.038	3.88366e-239
SLMO2	3.04596e-243	0.380139	0.434	0.055	5.222e-239
NSRP1	6.41894e-243	0.424281	0.5	0.085	1.10046e-238
MALSU1	9.82592e-243	0.371665	0.408	0.045	1.68456e-238
UBBP4	1.09392e-242	0.375171	0.402	0.043	1.87541e-238
ZFAS1	1.10238e-242	0.551942	0.807	0.365	1.88991e-238
PPIG	1.33984e-242	0.460133	0.572	0.128	2.29703e-238
KDELR2	2.46208e-242	0.396768	0.458	0.066	4.221e-238
POLR3H	2.74372e-242	0.340057	0.346	0.024	4.70383e-238
EED	2.94984e-242	0.421116	0.384	0.037	5.0572e-238
MRPL9	4.12071e-242	0.412303	0.47	0.072	7.06455e-238
ZWINT	5.62031e-242	0.355778	0.314	0.014	9.63547e-238
HNRNPH3	1.05765e-241	0.431262	0.461	0.069	1.81323e-237
PDCD10	2.24531e-241	0.382238	0.433	0.056	3.84937e-237
ORMDL2	4.13161e-241	0.375898	0.445	0.06	7.08323e-237
MPHOSPH10	4.30367e-241	0.382618	0.442	0.059	7.37822e-237
USP1	5.04245e-241	0.446497	0.416	0.05	8.64478e-237
DUSP4	7.29527e-241	0.372687	0.324	0.018	1.2507e-236
NAA50	9.08405e-241	0.363923	0.373	0.033	1.55737e-236
DNAJB6	1.20429e-240	0.421829	0.518	0.096	2.06463e-236
UBXN4	1.38709e-240	0.460419	0.57	0.129	2.37804e-236
ESF1	1.39917e-240	0.430631	0.502	0.089	2.39874e-236
PDCL3	1.67841e-240	0.403689	0.451	0.064	2.87746e-236
AIMP2	1.81931e-240	0.340108	0.368	0.031	3.11903e-236
ZNF511	2.80731e-240	0.338793	0.379	0.035	4.81285e-236
C21orf59	3.51238e-240	0.35092	0.372	0.033	6.02162e-236
USP14	3.73734e-240	0.332795	0.367	0.031	6.40729e-236
TIMM8A	4.07925e-240	0.334415	0.353	0.026	6.99346e-236
DDT	7.55227e-240	0.477333	0.577	0.135	1.29476e-235
ETF1	7.62093e-240	0.352053	0.358	0.028	1.30653e-235
ATG3	8.9203e-240	0.378137	0.432	0.056	1.5293e-235
RRP1	2.94717e-239	0.365061	0.385	0.038	5.05262e-235
SNRNP27	9.88422e-239	0.430704	0.484	0.08	1.69455e-234
DNTTIP2	2.53442e-238	0.389683	0.441	0.06	4.34501e-234
SOD2	8.98256e-238	0.491006	0.63	0.174	1.53997e-233
DAZAP1	1.73669e-237	0.369056	0.43	0.056	2.97739e-233
PGP	1.88786e-237	0.353139	0.37	0.033	3.23654e-233
RHEB	1.44309e-236	0.365215	0.416	0.05	2.47404e-232
RNF126	5.74468e-236	0.375342	0.42	0.052	9.84867e-232
CCDC59	7.93414e-236	0.439846	0.488	0.085	1.36023e-231
AUP1	1.00967e-235	0.391928	0.452	0.066	1.73098e-231
MRPL35	1.02646e-235	0.311985	0.324	0.019	1.75976e-231
DYNC1I2	1.46694e-235	0.424361	0.507	0.094	2.51492e-231
C20orf27	2.10133e-235	0.350537	0.384	0.039	3.60253e-231
HAX1	3.48195e-235	0.422157	0.498	0.089	5.96945e-231
MYCBP	4.87429e-235	0.338251	0.355	0.029	8.35649e-231
MCM6	4.89589e-235	0.354306	0.358	0.03	8.39351e-231
MAPKAPK3	9.94285e-235	0.323528	0.337	0.023	1.7046e-230
PSMD3	1.11966e-234	0.362884	0.389	0.041	1.91954e-230
EIF3D	1.57593e-234	0.482373	0.591	0.148	2.70177e-230
BMS1	2.76891e-234	0.341581	0.371	0.034	4.74702e-230
RNASEK	5.53811e-234	0.438725	0.564	0.129	9.49453e-230
COMMD1	1.13912e-233	0.360598	0.392	0.042	1.95291e-229
COX14	1.40395e-233	0.451657	0.567	0.131	2.40693e-229
MRPS5	1.58607e-233	0.392438	0.437	0.061	2.71916e-229
PTBP1	2.59547e-233	0.403101	0.439	0.062	4.44968e-229
NIP7	4.9485e-233	0.335191	0.364	0.032	8.48371e-229
ARL5A	9.87354e-233	0.395649	0.423	0.056	1.69272e-228
PBDC1	3.59338e-232	0.354105	0.396	0.044	6.1605e-228
GPN3	6.08011e-232	0.341169	0.354	0.029	1.04237e-227
EIF4H	1.30243e-231	0.411514	0.472	0.079	2.23288e-227
CAP1	1.77639e-231	0.436101	0.542	0.117	3.04544e-227
HSPA4	2.22504e-231	0.337263	0.372	0.035	3.81461e-227
UBE2V1	1.58603e-230	0.388572	0.449	0.068	2.71909e-226
ELAVL1	1.76342e-230	0.37255	0.412	0.052	3.02321e-226
UMPS	3.90314e-230	0.320631	0.352	0.029	6.69154e-226
TUSC2	4.28277e-230	0.348688	0.391	0.043	7.34238e-226
DNPEP	4.3823e-230	0.370012	0.396	0.045	7.51301e-226
STUB1	5.29759e-230	0.424208	0.489	0.089	9.08219e-226
COPS3	5.72896e-230	0.358393	0.372	0.036	9.82173e-226
IL2RG	5.83262e-230	0.475847	0.661	0.206	9.99944e-226
CRIP1	7.86371e-230	0.579729	0.601	0.161	1.34815e-225
RQCD1	7.96699e-230	0.390651	0.419	0.055	1.36586e-225
NDFIP1	1.09104e-229	0.459746	0.562	0.131	1.87048e-225
SHMT2	2.85759e-229	0.368842	0.393	0.045	4.89905e-225
PPP2CA	3.15477e-229	0.380426	0.436	0.062	5.40854e-225
COA4	3.46359e-229	0.386893	0.412	0.053	5.93798e-225
CSK	7.66868e-229	0.409295	0.473	0.08	1.31472e-224
CTC-479C5.12	1.19694e-228	0.311861	0.346	0.028	2.05204e-224
RBBP4	1.35715e-228	0.389941	0.476	0.081	2.3267e-224
SCO2	2.55426e-228	0.325218	0.355	0.031	4.37902e-224
FKBP3	3.24168e-228	0.38383	0.428	0.059	5.55753e-224
GARS	5.32563e-228	0.367256	0.404	0.049	9.13025e-224
HAUS1	1.00141e-227	0.343485	0.347	0.029	1.71682e-223
SUGT1	1.02612e-227	0.363051	0.382	0.041	1.75918e-223
USP16	1.15468e-227	0.418832	0.475	0.082	1.97959e-223
RAB8A	1.18894e-227	0.353818	0.391	0.044	2.03831e-223
XRN2	1.37092e-227	0.415375	0.508	0.098	2.3503e-223
CIRBP	1.79061e-227	0.524223	0.749	0.301	3.06983e-223
HNRNPH1	1.81522e-227	0.642524	0.672	0.23	3.11201e-223
MIEN1	2.16662e-227	0.38206	0.428	0.06	3.71446e-223
PYURF	3.43672e-227	0.440242	0.538	0.117	5.89191e-223
CMC1	3.74456e-227	0.33195	0.36	0.033	6.41968e-223
SMIM12	4.48078e-227	0.357921	0.387	0.043	7.68184e-223
DDOST	4.70038e-227	0.385537	0.463	0.075	8.05833e-223
RFC4	6.16179e-227	0.319205	0.32	0.02	1.05638e-222
POP5	7.29263e-227	0.371823	0.41	0.052	1.25025e-222
RPAIN	1.06258e-226	0.386098	0.436	0.064	1.82169e-222
SMC1A	1.46762e-226	0.402255	0.415	0.055	2.51608e-222
KPNA2	2.72023e-226	0.322162	0.331	0.024	4.66356e-222
SUCLG1	3.95863e-226	0.357845	0.406	0.051	6.78667e-222
REL	4.97983e-226	0.419145	0.372	0.039	8.53743e-222
UBE2K	6.86732e-226	0.332865	0.378	0.04	1.17733e-221
PSMC6	7.86849e-226	0.378173	0.428	0.061	1.34897e-221
TPR	7.92652e-226	0.497713	0.603	0.163	1.35892e-221
TDG	1.00221e-225	0.385173	0.404	0.05	1.71819e-221
EMC7	1.01819e-225	0.352081	0.415	0.055	1.74559e-221
PSMG3	1.39071e-225	0.346925	0.371	0.038	2.38424e-221
MRPS28	5.47399e-225	0.330167	0.362	0.034	9.3846e-221
EZH2	9.03447e-225	0.2932	0.277	0.009	1.54887e-220
PAFAH1B3	2.27513e-224	0.36473	0.383	0.043	3.90049e-220
SURF2	2.32771e-224	0.336345	0.364	0.036	3.99063e-220
UFM1	3.1294e-224	0.357403	0.404	0.051	5.36505e-220
MOB1A	3.60667e-224	0.368682	0.42	0.058	6.18328e-220
NME4	6.76493e-224	0.332872	0.34	0.027	1.15978e-219
VTI1B	1.35986e-223	0.357791	0.407	0.053	2.33134e-219
AC010642.1	1.36266e-223	0.338788	0.372	0.039	2.33614e-219
MRPS25	1.39001e-223	0.372732	0.42	0.058	2.38304e-219
PCNP	3.30871e-223	0.394332	0.466	0.08	5.67246e-219
CISH	5.10234e-223	0.336797	0.338	0.027	8.74744e-219
ATAD2	9.33991e-223	0.321013	0.308	0.018	1.60123e-218
GPR171	1.01268e-222	0.381779	0.388	0.045	1.73614e-218
BCL2A1	1.07141e-222	0.411233	0.388	0.046	1.83682e-218
MRPS11	1.44215e-222	0.341452	0.373	0.04	2.47243e-218
DBNL	2.70054e-222	0.396008	0.454	0.074	4.6298e-218
POLR2C	2.73046e-222	0.379692	0.414	0.057	4.6811e-218
CBWD2	2.93526e-222	0.320525	0.352	0.032	5.03221e-218
SSR3	4.24958e-222	0.361948	0.412	0.056	7.28548e-218
LARS	5.08912e-222	0.406645	0.443	0.069	8.72478e-218
MESDC2	1.06023e-221	0.378668	0.452	0.073	1.81767e-217
MLEC	2.18837e-221	0.380478	0.432	0.064	3.75173e-217
LAT	9.64221e-221	0.500493	0.574	0.151	1.65306e-216
IMMT	1.4974e-220	0.330046	0.371	0.039	2.56714e-216
FUBP1	1.76869e-220	0.357629	0.387	0.046	3.03225e-216
WDR1	2.76612e-220	0.411711	0.466	0.082	4.74223e-216
FDX1	3.21398e-220	0.39088	0.401	0.052	5.51005e-216
AHCY	3.50516e-220	0.32703	0.35	0.032	6.00924e-216
TMBIM4	6.06573e-220	0.406202	0.531	0.116	1.03991e-215
WDR46	6.7077e-220	0.326741	0.348	0.032	1.14997e-215
EXOSC9	8.81762e-220	0.303492	0.312	0.02	1.51169e-215
MRPS35	1.37872e-219	0.346303	0.383	0.045	2.36368e-215
SLC39A4	1.68897e-219	0.321026	0.326	0.025	2.89558e-215
RPN2	1.79049e-219	0.370229	0.459	0.077	3.06961e-215
REXO4	2.45319e-219	0.370517	0.428	0.064	4.20575e-215
NDUFA5	2.81106e-219	0.369458	0.429	0.064	4.81928e-215
GNB2	2.90152e-219	0.404912	0.465	0.082	4.97436e-215
NOP14	2.93282e-219	0.332626	0.337	0.028	5.02803e-215
LYPLA2	3.86797e-219	0.311022	0.352	0.033	6.63125e-215
RNF7	5.98911e-219	0.402498	0.491	0.095	1.02677e-214
AAMP	6.43352e-219	0.356251	0.395	0.049	1.10296e-214
RAD51C	1.33084e-218	0.317587	0.335	0.028	2.28159e-214
NUDT21	2.27969e-218	0.355368	0.388	0.047	3.9083e-214
PRPF19	3.18726e-218	0.326569	0.346	0.032	5.46423e-214
RP11-386G11.10	3.51475e-218	0.47832	0.594	0.166	6.02568e-214
IDH3B	7.39983e-218	0.364205	0.419	0.06	1.26863e-213
CSDE1	8.73539e-218	0.409222	0.503	0.103	1.4976e-213
SNRPA	4.35558e-217	0.375098	0.422	0.063	7.46721e-213
ASNA1	4.5026e-217	0.347812	0.396	0.051	7.71925e-213
RABGGTB	4.92894e-217	0.328532	0.34	0.03	8.45017e-213
PPA2	5.87232e-217	0.347385	0.388	0.048	1.00675e-212
NDUFS2	6.38603e-217	0.354404	0.42	0.061	1.09482e-212
DPH3	7.00114e-217	0.299388	0.327	0.025	1.20028e-212
UBE2A	7.33866e-217	0.294272	0.319	0.023	1.25814e-212
RAB2A	9.88535e-217	0.365374	0.42	0.061	1.69474e-212
UPF2	1.02924e-216	0.454444	0.595	0.165	1.76453e-212
BLOC1S2	1.26202e-216	0.344619	0.39	0.049	2.16361e-212
ASNSD1	7.66841e-216	0.328739	0.364	0.039	1.31467e-211
FAM173A	1.1901e-215	0.325457	0.332	0.028	2.04031e-211
DPP7	1.28595e-215	0.386844	0.434	0.068	2.20463e-211
CENPH	2.38839e-215	0.310146	0.306	0.02	4.09465e-211
SRSF10	3.54492e-215	0.341601	0.388	0.048	6.07741e-211
YEATS4	3.56806e-215	0.321378	0.348	0.033	6.11708e-211
AIP	8.47159e-215	0.395916	0.452	0.078	1.45237e-210
BCAP31	1.12728e-214	0.395228	0.492	0.098	1.93261e-210
SLC1A5	1.22829e-214	0.29667	0.309	0.021	2.10579e-210
RAB11A	1.95062e-214	0.33883	0.398	0.052	3.34414e-210
SREK1IP1	2.03288e-214	0.356407	0.423	0.063	3.48517e-210
DRG1	4.24465e-214	0.345413	0.377	0.045	7.27702e-210
SURF6	8.66602e-214	0.369797	0.404	0.056	1.4857e-209
AIF1	2.04869e-213	0.477012	0.565	0.147	3.51227e-209
VPS25	3.79487e-213	0.321061	0.355	0.036	6.50593e-209
PARL	4.77858e-213	0.356765	0.386	0.049	8.19239e-209
DAP3	4.79738e-213	0.360423	0.43	0.067	8.22463e-209
2020-09-15	7.25205e-213	0.411862	0.547	0.131	1.24329e-208
CD3G	1.13275e-212	0.499672	0.64	0.204	1.94199e-208
REXO2	1.23533e-212	0.387775	0.464	0.084	2.11784e-208
GCHFR	1.24577e-212	0.319328	0.349	0.034	2.13575e-208
RHOG	1.50191e-212	0.394483	0.445	0.076	2.57487e-208
RIOK1	1.56036e-212	0.304321	0.319	0.025	2.67508e-208
EBP	1.73678e-212	0.332586	0.356	0.037	2.97753e-208
ANXA11	3.89488e-212	0.388972	0.46	0.082	6.67737e-208
C1orf86	7.53022e-212	0.372062	0.438	0.072	1.29098e-207
TYW3	1.14416e-211	0.305753	0.317	0.024	1.96154e-207
BCLAF1	1.98507e-211	0.428301	0.527	0.123	3.4032e-207
RP1-241P17.4	2.07243e-211	0.318143	0.34	0.032	3.55298e-207
MSN	2.07433e-211	0.406005	0.493	0.101	3.55623e-207
AMD1	2.50721e-211	0.367738	0.415	0.062	4.29835e-207
ICT1	2.63612e-211	0.294525	0.326	0.027	4.51937e-207
MED4	2.87568e-211	0.39069	0.479	0.092	4.93007e-207
SYF2	3.19151e-211	0.460796	0.675	0.236	5.47153e-207
SMARCE1	4.2844e-211	0.362471	0.419	0.064	7.34518e-207
C4orf32	4.57335e-211	0.309888	0.331	0.029	7.84056e-207
DUSP23	5.97555e-211	0.312479	0.334	0.03	1.02445e-206
CHCHD5	1.81001e-210	0.381278	0.456	0.081	3.10308e-206
PDHA1	2.35723e-210	0.316494	0.353	0.037	4.04123e-206
GRB2	3.84663e-210	0.37964	0.472	0.09	6.59466e-206
LRR1	4.66986e-210	0.281828	0.292	0.017	8.00601e-206
COMMD4	5.1135e-210	0.2847	0.289	0.016	8.76659e-206
PPP2R1A	6.82228e-210	0.361477	0.421	0.065	1.16961e-205
PPP1R7	1.39856e-209	0.356078	0.418	0.064	2.39769e-205
SRSF6	1.73015e-209	0.364322	0.404	0.058	2.96616e-205
LYPLA1	1.99587e-209	0.332286	0.375	0.046	3.42172e-205
RABEP1	2.17892e-209	0.326334	0.362	0.041	3.73554e-205
PTPN1	2.74938e-209	0.359422	0.407	0.059	4.71354e-205
C19orf60	2.97012e-209	0.425587	0.511	0.113	5.09197e-205
MTPN	1.75053e-208	0.355244	0.4	0.056	3.00111e-204
FAM96A	2.03964e-208	0.352726	0.405	0.058	3.49675e-204
NIT2	2.5265e-208	0.30996	0.334	0.031	4.33144e-204
DNAJC21	3.53128e-208	0.33276	0.372	0.045	6.05403e-204
TMED2	3.84628e-208	0.353426	0.427	0.068	6.59406e-204
PNN	4.1752e-208	0.41126	0.49	0.101	7.15796e-204
MRPS31	6.45994e-208	0.338929	0.426	0.067	1.10749e-203
OCIAD2	8.67185e-208	0.48434	0.737	0.308	1.4867e-203
TMEM14C	9.47944e-208	0.355287	0.388	0.052	1.62515e-203
TMEM141	1.01542e-207	0.347498	0.38	0.049	1.74083e-203
RAD23B	1.08762e-207	0.332403	0.365	0.042	1.86461e-203
CD82	1.10669e-207	0.367921	0.363	0.042	1.8973e-203
MRPL39	1.6162e-207	0.296558	0.308	0.023	2.77081e-203
MED28	4.10435e-207	0.365647	0.432	0.071	7.03649e-203
AFG3L2	4.77262e-207	0.299169	0.321	0.027	8.18219e-203
NFKBIB	9.46737e-207	0.299256	0.303	0.022	1.62309e-202
CHCHD3	9.60673e-207	0.311517	0.32	0.027	1.64698e-202
RUNX3	1.04137e-206	0.324116	0.34	0.034	1.78533e-202
SLC43A3	1.11063e-206	0.316852	0.313	0.025	1.90406e-202
SEC62	1.13793e-206	0.464669	0.728	0.291	1.95087e-202
NANS	1.77888e-206	0.294858	0.319	0.026	3.04971e-202
C1orf43	1.91661e-206	0.371948	0.411	0.063	3.28584e-202
C1orf122	2.10462e-206	0.349751	0.363	0.042	3.60815e-202
UTP18	2.14756e-206	0.339774	0.37	0.045	3.68178e-202
HAT1	2.28103e-206	0.306349	0.326	0.029	3.9106e-202
SZRD1	2.43705e-206	0.318223	0.38	0.049	4.17808e-202
TRIM28	2.62411e-206	0.348754	0.395	0.055	4.49878e-202
EIF1B	2.98206e-206	0.365903	0.444	0.077	5.11244e-202
RP11-386I14.4	4.88559e-206	0.316482	0.325	0.029	8.37585e-202
CANX	4.88561e-206	0.358306	0.405	0.06	8.3759e-202
C16orf80	5.08063e-206	0.300747	0.324	0.028	8.71023e-202
EWSR1	8.20651e-206	0.39693	0.468	0.091	1.40692e-201
SF3B4	1.06948e-205	0.337037	0.382	0.05	1.83352e-201
PDXK	1.24689e-205	0.308043	0.318	0.027	2.13767e-201
HMGB2	1.28733e-205	0.515032	0.476	0.098	2.20699e-201
MRPL42	1.6239e-205	0.298237	0.319	0.027	2.78401e-201
URM1	3.0957e-205	0.344481	0.402	0.058	5.30727e-201
SMARCA5	3.74334e-205	0.348506	0.394	0.055	6.41759e-201
PFDN1	4.07906e-205	0.352792	0.424	0.068	6.99314e-201
SLA	1.257e-204	0.370334	0.348	0.038	2.15501e-200
BEST1	1.30343e-204	0.463011	0.616	0.19	2.2346e-200
EIF4G1	1.62655e-204	0.361243	0.412	0.063	2.78856e-200
KRR1	1.86875e-204	0.346883	0.378	0.049	3.20379e-200
ECH1	2.08482e-204	0.405068	0.486	0.102	3.57421e-200
NME2	2.54054e-204	0.25657	0.257	0.009	4.35551e-200
TMEM256	2.6528e-204	0.390318	0.5	0.108	4.54796e-200
TSR1	3.49942e-204	0.313589	0.332	0.032	5.9994e-200
CD99	1.24583e-203	0.398611	0.474	0.095	2.13585e-199
MIR4435-1HG	1.39097e-203	0.319089	0.262	0.011	2.38468e-199
DIMT1	1.48642e-203	0.298936	0.336	0.033	2.54831e-199
TLN1	3.34191e-203	0.372312	0.455	0.085	5.72936e-199
TMEM106C	3.54462e-203	0.294103	0.293	0.02	6.07689e-199
RAP1B	4.95746e-203	0.366696	0.455	0.085	8.49907e-199
HDAC1	5.55182e-203	0.359838	0.408	0.063	9.51804e-199
TIMM23	1.54402e-202	0.298227	0.309	0.025	2.64706e-198
DYNLT1	1.84511e-202	0.35119	0.408	0.063	3.16326e-198
MATR3	2.09166e-202	0.394877	0.495	0.108	3.58594e-198
TIMM9	2.14144e-202	0.344519	0.388	0.054	3.67128e-198
CHD4	3.28282e-202	0.344438	0.388	0.054	5.62807e-198
SNW1	3.8098e-202	0.364548	0.443	0.079	6.53153e-198
GNPDA1	6.10032e-202	0.331799	0.351	0.04	1.04584e-197
CLDND1	1.20721e-201	0.317725	0.382	0.051	2.06964e-197
CENPU	4.98939e-201	0.266955	0.253	0.009	8.55382e-197
BYSL	7.49394e-201	0.260766	0.269	0.013	1.28476e-196
YBX3	1.67819e-200	0.318971	0.305	0.024	2.87708e-196
RPP21	1.78386e-200	0.360617	0.433	0.075	3.05824e-196
DNAJA2	1.91315e-200	0.322058	0.357	0.042	3.2799e-196
HSPA14	1.92555e-200	0.284914	0.289	0.019	3.30116e-196
CYTIP	2.13673e-200	0.437942	0.519	0.126	3.66322e-196
NDUFS4	3.60264e-200	0.353769	0.417	0.068	6.17636e-196
BCAS2	4.7125e-200	0.338982	0.397	0.059	8.07911e-196
CD81	1.52361e-199	0.3332	0.391	0.057	2.61207e-195
RALA	1.56525e-199	0.304211	0.361	0.044	2.68346e-195
CSNK2A1	3.06964e-199	0.301128	0.329	0.033	5.26259e-195
ATRAID	4.25266e-199	0.392692	0.474	0.098	7.29076e-195
RRS1	7.26554e-199	0.319266	0.337	0.036	1.2456e-194
PPP1CB	1.4176e-198	0.35296	0.421	0.071	2.43034e-194
EXOSC7	1.50313e-198	0.327463	0.364	0.046	2.57696e-194
RBCK1	1.76802e-198	0.354459	0.415	0.068	3.03109e-194
GLRX2	2.04175e-198	0.259066	0.271	0.015	3.50037e-194
KXD1	2.10975e-198	0.328861	0.37	0.048	3.61696e-194
RTFDC1	2.4002e-198	0.349218	0.413	0.067	4.11491e-194
UROD	2.88158e-198	0.30956	0.321	0.03	4.94017e-194
TRMT6	3.1661e-198	0.285493	0.3	0.023	5.42797e-194
VPS28	5.13134e-198	0.427766	0.542	0.144	8.79717e-194
RRP1B	6.69018e-198	0.331016	0.367	0.048	1.14696e-193
NUDCD2	9.28161e-198	0.351611	0.408	0.065	1.59124e-193
PRPF31	1.06615e-197	0.327825	0.364	0.046	1.82781e-193
ARGLU1	1.12394e-197	0.451619	0.588	0.174	1.92688e-193
MRPS14	1.5174e-197	0.336347	0.381	0.053	2.60144e-193
CD48	3.66466e-197	0.608618	0.587	0.186	6.28269e-193
PSENEN	4.65998e-197	0.315838	0.388	0.056	7.98908e-193
COPZ1	4.84145e-197	0.32299	0.372	0.05	8.30019e-193
CCL3	1.2324e-196	0.506496	0.738	0.316	2.11283e-192
NAE1	2.4986e-196	0.335925	0.396	0.06	4.2836e-192
SNX3	3.37309e-196	0.389804	0.486	0.107	5.78283e-192
MED10	3.6551e-196	0.388089	0.487	0.107	6.26631e-192
RNF19A	1.93191e-195	0.322651	0.349	0.042	3.31207e-191
MCUR1	3.26158e-195	0.267382	0.288	0.02	5.59166e-191
MLF2	3.31252e-195	0.337164	0.385	0.056	5.67899e-191
LYRM4	3.44179e-195	0.348262	0.425	0.074	5.9006e-191
SLTM	5.21383e-195	0.392244	0.466	0.097	8.93859e-191
PABPC4	6.98129e-195	0.32558	0.371	0.05	1.19687e-190
NAMPT	7.04558e-195	0.310281	0.327	0.034	1.20789e-190
GART	8.14349e-195	0.308626	0.34	0.038	1.39612e-190
JUNB	8.72014e-195	0.498637	0.551	0.152	1.49498e-190
THYN1	1.8273e-194	0.353771	0.414	0.07	3.13273e-190
CDK11A	1.9968e-194	0.356232	0.42	0.072	3.42332e-190
ATF4	2.06276e-194	0.344951	0.4	0.063	3.5364e-190
PGLS	6.04398e-194	0.325534	0.388	0.058	1.03618e-189
SMC4	7.37535e-194	0.301046	0.296	0.024	1.26443e-189
WBP4	1.28435e-193	0.304951	0.332	0.035	2.20189e-189
UBA2	1.94072e-193	0.305349	0.356	0.044	3.32716e-189
MPC2	2.70535e-193	0.321364	0.364	0.048	4.63805e-189
CITE-CD279-PD1-ACAGCGCCGTATTTA	3.43445e-193	0.369087	0.998	0.999	5.88801e-189
NAPA	2.57848e-192	0.333742	0.397	0.063	4.42055e-188
TIMM17B	2.95694e-192	0.332284	0.384	0.057	5.06937e-188
ACIN1	3.77203e-192	0.316175	0.344	0.041	6.46677e-188
PPP4R2	4.6986e-192	0.316753	0.365	0.049	8.05528e-188
MAP2K3	5.08787e-192	0.29648	0.312	0.029	8.72264e-188
EFHD2	6.7806e-192	0.340652	0.41	0.069	1.16247e-187
CAPRIN1	8.61018e-192	0.288141	0.323	0.033	1.47613e-187
GRHPR	1.7411e-191	0.303898	0.347	0.042	2.98494e-187
CBX1	2.20561e-191	0.335674	0.368	0.051	3.78131e-187
SRRT	4.09409e-191	0.286983	0.316	0.031	7.0189e-187
NAP1L4	4.41068e-191	0.419074	0.518	0.132	7.56167e-187
MRPS18A	5.37265e-191	0.287745	0.324	0.033	9.21087e-187
EXOC2	5.51656e-191	0.314545	0.282	0.02	9.45758e-187
ARHGDIB	7.36066e-191	0.479504	0.82	0.454	1.26191e-186
BCL7C	1.1241e-190	0.321993	0.366	0.05	1.92716e-186
GABARAP	1.2425e-190	0.420701	0.594	0.185	2.13014e-186
CBR1	1.26326e-190	0.328079	0.363	0.049	2.16573e-186
TUBG1	1.29676e-190	0.254703	0.265	0.015	2.22316e-186
SRSF1	1.68523e-190	0.371717	0.433	0.082	2.88916e-186
TRAF1	1.95419e-190	0.330383	0.371	0.052	3.35027e-186
BLVRA	2.72441e-190	0.270808	0.296	0.025	4.67073e-186
HARS	2.75284e-190	0.300992	0.335	0.038	4.71947e-186
HM13	2.88405e-190	0.348946	0.412	0.071	4.94441e-186
YTHDF2	3.09973e-190	0.306113	0.345	0.042	5.31417e-186
SURF4	3.44437e-190	0.309109	0.366	0.05	5.90504e-186
TCOF1	4.8393e-190	0.291602	0.307	0.028	8.2965e-186
RNASEH2A	5.66946e-190	0.278812	0.284	0.021	9.71972e-186
HMOX2	9.2391e-190	0.351084	0.426	0.078	1.58395e-185
FXN	1.07008e-189	0.306745	0.335	0.039	1.83454e-185
RFC3	4.13828e-189	0.269376	0.255	0.013	7.09467e-185
NAA15	7.21841e-189	0.309793	0.331	0.037	1.23752e-184
CAPNS1	9.44029e-189	0.323913	0.385	0.059	1.61844e-184
CENPM	2.03157e-188	0.307322	0.29	0.024	3.48293e-184
OTUB1	2.82365e-188	0.354601	0.413	0.073	4.84086e-184
FAM50A	2.86934e-188	0.295509	0.327	0.036	4.9192e-184
GNAS	3.51545e-188	0.369467	0.463	0.099	6.02689e-184
MRPL53	4.6432e-188	0.344765	0.422	0.077	7.96031e-184
MFNG	4.86492e-188	0.3564	0.412	0.072	8.34042e-184
NABP2	6.45641e-188	0.272981	0.289	0.023	1.10689e-183
ZBTB8OS	1.27574e-187	0.325486	0.38	0.057	2.18712e-183
NSFL1C	1.41773e-187	0.307604	0.351	0.046	2.43056e-183
SF3A3	2.36003e-187	0.319097	0.356	0.048	4.04603e-183
C1D	2.58566e-187	0.307068	0.345	0.043	4.43286e-183
TCERG1	3.1572e-187	0.336033	0.399	0.066	5.41271e-183
BATF3	3.37604e-187	0.31275	0.282	0.021	5.78789e-183
ZDHHC12	5.16467e-187	0.286312	0.323	0.034	8.85431e-183
PTS	1.15447e-186	0.267244	0.284	0.022	1.97922e-182
LPIN2	1.42181e-186	0.330843	0.361	0.05	2.43755e-182
MAPRE1	1.57182e-186	0.298325	0.34	0.042	2.69473e-182
HRAS	1.94062e-186	0.27047	0.29	0.024	3.32699e-182
RELB	2.51856e-186	0.297116	0.333	0.039	4.31783e-182
SCAMP3	7.5018e-186	0.314597	0.39	0.062	1.28611e-181
NOC3L	1.31232e-185	0.277402	0.293	0.025	2.24985e-181
CRELD2	1.42821e-185	0.293907	0.317	0.034	2.44852e-181
RDX	3.73508e-185	0.289149	0.276	0.02	6.40342e-181
RNF213	4.06687e-185	0.458843	0.631	0.224	6.97223e-181
PTRH1	4.20929e-185	0.274052	0.293	0.025	7.2164e-181
NUBP2	5.69042e-185	0.319441	0.361	0.051	9.75565e-181
C9orf114	5.94156e-185	0.267344	0.29	0.024	1.01862e-180
ANXA7	1.4527e-184	0.345221	0.418	0.077	2.4905e-180
MPG	1.74013e-184	0.279644	0.332	0.039	2.98327e-180
PRIM1	2.15591e-184	0.268234	0.274	0.02	3.69609e-180
VKORC1	2.68288e-184	0.27928	0.3	0.028	4.59953e-180
IFNG	6.05805e-184	0.467432	0.644	0.235	1.03859e-179
RFXANK	6.8875e-184	0.296507	0.332	0.04	1.18079e-179
EMD	7.54336e-184	0.296687	0.349	0.046	1.29323e-179
SMARCB1	1.04072e-183	0.298104	0.334	0.041	1.78421e-179
RBBP7	1.27987e-183	0.312691	0.354	0.048	2.19421e-179
C12orf10	1.30543e-183	0.305902	0.363	0.052	2.23803e-179
RBM27	1.59746e-183	0.335393	0.397	0.067	2.73869e-179
SEC13	1.79523e-183	0.27844	0.324	0.036	3.07775e-179
C7orf55-LUC7L2	2.99725e-183	0.30555	0.338	0.042	5.13848e-179
CD164	4.5409e-183	0.336532	0.428	0.082	7.78492e-179
CD3E	4.60913e-183	0.421486	0.654	0.244	7.9019e-179
MIER1	4.77341e-183	0.340265	0.396	0.067	8.18354e-179
NOC2L	9.16952e-183	0.325576	0.388	0.064	1.57202e-178
PPID	9.49964e-183	0.288949	0.306	0.031	1.62862e-178
PRICKLE4	1.05646e-182	0.278004	0.315	0.033	1.8112e-178
GSTK1	1.69048e-182	0.452163	0.624	0.221	2.89816e-178
PTPRCAP	2.36159e-182	0.486619	0.79	0.418	4.04871e-178
UTP6	3.51053e-182	0.273279	0.286	0.024	6.01845e-178
RCC1	4.69648e-182	0.255755	0.276	0.021	8.05165e-178
POLE4	5.39961e-182	0.35801	0.456	0.098	9.2571e-178
C17orf49	6.47389e-182	0.308541	0.351	0.048	1.10988e-177
GEMIN6	6.97824e-182	0.275017	0.287	0.025	1.19635e-177
EIF3B	1.55202e-181	0.323652	0.361	0.053	2.66078e-177
HUWE1	2.02992e-181	0.334097	0.38	0.061	3.4801e-177
TNIP3	2.05013e-181	0.334827	0.239	0.011	3.51474e-177
ISY1	2.45693e-181	0.284115	0.314	0.034	4.21215e-177
TEX30	2.80744e-181	0.258929	0.268	0.019	4.81308e-177
SAT1	3.38785e-181	0.438589	0.573	0.179	5.80813e-177
BAZ1B	5.14954e-181	0.313862	0.345	0.046	8.82838e-177
ADK	5.48053e-181	0.30985	0.324	0.038	9.39582e-177
LCK	7.96119e-181	0.420145	0.554	0.166	1.36487e-176
SUZ12	8.87928e-181	0.313353	0.352	0.049	1.52226e-176
SSR2	9.75272e-181	0.436123	0.677	0.273	1.67201e-176
C1orf228	1.50447e-180	0.308753	0.308	0.032	2.57927e-176
DBF4	1.6266e-180	0.260798	0.286	0.025	2.78864e-176
BTG3	1.70666e-180	0.270063	0.267	0.019	2.92589e-176
CDKN2AIPNL	1.86498e-180	0.272319	0.299	0.029	3.19733e-176
PPT1	2.75541e-180	0.306459	0.368	0.056	4.72387e-176
THOC6	2.95796e-180	0.284415	0.308	0.032	5.07114e-176
RAP1A	3.4683e-180	0.36149	0.42	0.082	5.94605e-176
MED30	4.16176e-180	0.285663	0.343	0.045	7.13493e-176
C21orf33	6.1662e-180	0.300791	0.332	0.041	1.05713e-175
2020-09-02	6.2647e-180	0.298467	0.356	0.051	1.07402e-175
CSNK1A1	1.36254e-179	0.346494	0.425	0.083	2.33594e-175
AMICA1	3.19147e-179	0.345474	0.352	0.05	5.47145e-175
GEMIN7	7.12534e-179	0.258796	0.286	0.025	1.22157e-174
UBE2J2	9.10604e-179	0.298463	0.343	0.046	1.56114e-174
HMGN3	1.11139e-178	0.378483	0.45	0.098	1.90537e-174
VAMP5	1.39998e-178	0.398049	0.428	0.088	2.40012e-174
CAST	1.41283e-178	0.339575	0.397	0.071	2.42215e-174
CTSB	2.13953e-178	0.402825	0.516	0.139	3.66801e-174
2020-09-01	2.16969e-178	0.379978	0.492	0.123	3.71972e-174
TMEM18	3.5951e-178	0.275578	0.308	0.033	6.16344e-174
MRPL2	4.56776e-178	0.305018	0.319	0.038	7.83097e-174
PRPF6	5.11442e-178	0.333436	0.422	0.082	8.76816e-174
MRPS2	5.82791e-178	0.272763	0.296	0.029	9.99138e-174
NEAT1	7.37451e-178	0.431659	0.676	0.275	1.26429e-173
TMEM183A	9.63983e-178	0.305521	0.32	0.038	1.65265e-173
DDX56	1.24751e-177	0.298545	0.32	0.038	2.13873e-173
EIF4E2	1.54668e-177	0.300459	0.34	0.045	2.65163e-173
MRPS18B	2.14238e-177	0.336105	0.42	0.082	3.6729e-173
NFE2L2	2.31309e-177	0.325721	0.397	0.071	3.96557e-173
ARID5B	3.91475e-177	0.407682	0.463	0.108	6.71144e-173
SYAP1	4.1625e-177	0.301223	0.322	0.039	7.13618e-173
SAMM50	4.96337e-177	0.266452	0.3	0.03	8.50921e-173
TCF25	5.02624e-177	0.364873	0.51	0.133	8.61699e-173
TMPO	5.88181e-177	0.308617	0.329	0.042	1.00838e-172
ZBED2	7.89094e-177	0.406682	0.336	0.046	1.35282e-172
ZCCHC10	5.37387e-176	0.28924	0.363	0.055	9.21296e-172
RAB10	7.28803e-176	0.284201	0.325	0.04	1.24946e-171
BRD7	8.15691e-176	0.342185	0.404	0.075	1.39842e-171
MAD2L2	1.14073e-175	0.283818	0.321	0.039	1.95566e-171
GNAI2	1.30978e-175	0.33876	0.444	0.095	2.24549e-171
PDHB	1.92233e-175	0.315361	0.366	0.057	3.29564e-171
NENF	2.2131e-175	0.327629	0.392	0.07	3.79414e-171
ARF4	2.56835e-175	0.30724	0.352	0.052	4.40319e-171
THUMPD3	3.09315e-175	0.277127	0.293	0.029	5.30289e-171
C12orf45	4.94774e-175	0.254033	0.267	0.02	8.48241e-171
POLDIP2	6.10517e-175	0.30099	0.316	0.038	1.04667e-170
TRUB2	6.1553e-175	0.262036	0.291	0.028	1.05526e-170
TRAPPC5	8.77042e-175	0.317098	0.363	0.057	1.5036e-170
GBP4	9.70764e-175	0.372231	0.413	0.082	1.66428e-170
VMA21	1.15506e-174	0.271665	0.304	0.033	1.98024e-170
CCDC12	1.16427e-174	0.348119	0.454	0.102	1.99603e-170
AATF	1.28232e-174	0.288875	0.314	0.037	2.19841e-170
POLR1C	1.46029e-174	0.291512	0.325	0.041	2.50351e-170
FXYD5	1.52796e-174	0.451426	0.8	0.45	2.61954e-170
GLO1	2.10445e-174	0.296507	0.316	0.038	3.60787e-170
COPS5	2.46337e-174	0.296754	0.331	0.043	4.22321e-170
YAF2	3.2411e-174	0.310203	0.336	0.046	5.55654e-170
SCAND1	3.46127e-174	0.398021	0.513	0.141	5.93399e-170
YDJC	3.46981e-174	0.29212	0.324	0.041	5.94863e-170
SNX5	5.02349e-174	0.264165	0.308	0.035	8.61228e-170
GTF2H2	7.93536e-174	0.253982	0.26	0.019	1.36044e-169
CINP	1.27046e-173	0.251516	0.279	0.025	2.17808e-169
PPIF	1.31194e-173	0.261765	0.265	0.02	2.24918e-169
TSFM	1.43939e-173	0.263227	0.282	0.026	2.46769e-169
UBXN1	1.4687e-173	0.421677	0.607	0.216	2.51793e-169
PES1	1.63312e-173	0.29108	0.329	0.043	2.79982e-169
MLX	1.66519e-173	0.296666	0.338	0.047	2.8548e-169
NOSIP	1.99719e-173	0.410493	0.548	0.165	3.42399e-169
SP100	5.12507e-173	0.384043	0.497	0.131	8.78643e-169
DHX9	5.38788e-173	0.269167	0.305	0.034	9.23699e-169
SMARCA4	5.62782e-173	0.27481	0.308	0.035	9.64833e-169
FTSJ3	6.71407e-173	0.266054	0.282	0.026	1.15106e-168
IER2	6.86742e-173	0.417378	0.476	0.12	1.17735e-168
LIMD2	7.64273e-173	0.484571	0.755	0.381	1.31027e-168
ASXL1	9.19137e-173	0.297714	0.329	0.043	1.57577e-168
RHOF	1.10863e-172	0.329613	0.388	0.069	1.90064e-168
SNAPIN	1.47874e-172	0.295577	0.34	0.048	2.53516e-168
WDR77	1.97384e-172	0.275948	0.302	0.033	3.38395e-168
MT-ND6	2.3845e-172	0.371344	0.458	0.107	4.08799e-168
LINC00493	3.29822e-172	0.386999	0.53	0.154	5.65447e-168
PTPMT1	5.08004e-172	0.284661	0.32	0.04	8.70921e-168
ZNF259	5.26679e-172	0.254872	0.28	0.026	9.02938e-168
MAP2K2	5.38101e-172	0.305007	0.345	0.05	9.2252e-168
FKBP8	5.40129e-172	0.370217	0.484	0.123	9.25996e-168
PTPRC	5.44123e-172	0.446077	0.736	0.35	9.32845e-168
GMPS	5.70352e-172	0.268579	0.285	0.027	9.77811e-168
CDC5L	5.82995e-172	0.281695	0.319	0.04	9.99487e-168
BRMS1	7.44356e-172	0.268651	0.32	0.04	1.27612e-167
ELOF1	9.01421e-172	0.298786	0.349	0.052	1.5454e-167
ATP6V1E1	1.17998e-171	0.300871	0.372	0.062	2.02296e-167
ACAT2	1.23015e-171	0.303528	0.328	0.044	2.10898e-167
LAG3	1.37326e-171	0.322891	0.318	0.04	2.35432e-167
CD53	1.84588e-171	0.34993	0.441	0.098	3.16457e-167
SAE1	3.17965e-171	0.277962	0.295	0.031	5.45119e-167
KIAA1143	6.28008e-171	0.303685	0.346	0.051	1.07666e-166
ANAPC15	7.27581e-171	0.288971	0.332	0.045	1.24736e-166
IAH1	1.4936e-170	0.297891	0.359	0.057	2.56062e-166
BCL2L12	1.75597e-170	0.251686	0.262	0.021	3.01044e-166
TAF11	2.99219e-170	0.303409	0.352	0.054	5.12981e-166
SNX6	3.215e-170	0.32564	0.428	0.09	5.51179e-166
MRPL46	3.44523e-170	0.27222	0.308	0.036	5.90651e-166
CCL4	3.97658e-170	0.490333	0.629	0.238	6.81745e-166
C4orf27	4.09504e-170	0.277085	0.297	0.032	7.02053e-166
ERI3	7.11465e-170	0.264671	0.288	0.029	1.21974e-165
IDH3G	1.03364e-169	0.286359	0.331	0.045	1.77207e-165
SBDS	1.30028e-169	0.294657	0.35	0.054	2.2292e-165
MT-ATP8	1.60406e-169	0.33775	0.398	0.077	2.74999e-165
UTP14A	2.47266e-169	0.251503	0.26	0.02	4.23912e-165
SNX17	2.59866e-169	0.317992	0.372	0.064	4.45514e-165
MAP7D3	3.33526e-169	0.269128	0.293	0.031	5.71796e-165
G3BP2	4.08734e-169	0.307047	0.372	0.063	7.00734e-165
SUPT5H	4.26465e-169	0.303196	0.371	0.063	7.31131e-165
APOBEC3C	4.43664e-169	0.281244	0.295	0.032	7.60618e-165
RP11-138A9.2	6.0232e-169	0.329642	0.339	0.049	1.03262e-164
DCTN6	7.17492e-169	0.266425	0.309	0.037	1.23007e-164
STAT3	1.43092e-168	0.353487	0.419	0.087	2.45317e-164
TNFRSF18	1.86255e-168	0.28789	0.3	0.034	3.19315e-164
CPNE1	2.57706e-168	0.320403	0.385	0.07	4.41811e-164
RALY	3.78247e-168	0.357718	0.399	0.079	6.48467e-164
SF3B1	4.69128e-168	0.356915	0.455	0.108	8.04273e-164
TMED10	4.9684e-168	0.305684	0.361	0.059	8.51782e-164
UBE2C	5.21968e-168	0.261842	0.204	0.006	8.94863e-164
TMEM165	7.4792e-168	0.264419	0.31	0.038	1.28223e-163
SAMSN1	1.03101e-167	0.297923	0.345	0.052	1.76757e-163
DUS1L	1.64016e-167	0.259766	0.289	0.03	2.81189e-163
SIAH2	2.16513e-167	0.264206	0.284	0.029	3.71189e-163
TAF1D	2.49113e-167	0.383133	0.47	0.119	4.27079e-163
PLEKHJ1	2.84578e-167	0.289683	0.332	0.047	4.87881e-163
PIM2	3.42561e-167	0.408845	0.499	0.139	5.87286e-163
TMEM205	3.96045e-167	0.257316	0.292	0.032	6.78979e-163
FARSB	5.08404e-167	0.276924	0.309	0.038	8.71607e-163
FAM60A	1.00442e-166	0.320915	0.357	0.059	1.72198e-162
EBPL	1.92239e-166	0.304687	0.388	0.072	3.29575e-162
ARMC10	2.37198e-166	0.264773	0.294	0.033	4.06653e-162
CD2BP2	2.47625e-166	0.276596	0.309	0.038	4.24528e-162
PLGRKT	2.97535e-166	0.283761	0.332	0.048	5.10095e-162
QTRT1	3.01299e-166	0.273145	0.304	0.036	5.16548e-162
HSPBP1	3.18554e-166	0.258865	0.276	0.027	5.46128e-162
CITE-HLA-DR-AATAGCGAGCAAGTA	3.36768e-166	0.295801	1	1	5.77355e-162
AP000350.4	3.49149e-166	0.274749	0.319	0.042	5.98581e-162
UCHL5	4.73149e-166	0.284523	0.31	0.039	8.11167e-162
RPAP3	5.08382e-166	0.29527	0.34	0.051	8.7157e-162
PQBP1	5.4965e-166	0.3061	0.377	0.067	9.42319e-162
DHFR	7.00737e-166	0.269978	0.265	0.023	1.20134e-161
FNBP1	8.43074e-166	0.351143	0.437	0.099	1.44537e-161
RBM42	1.3662e-165	0.274406	0.312	0.04	2.34222e-161
BTF3L4	1.59129e-165	0.279102	0.314	0.041	2.72811e-161
DHX36	1.79786e-165	0.340496	0.426	0.093	3.08226e-161
CHMP2B	1.80153e-165	0.270445	0.314	0.04	3.08855e-161
SNORD3A	1.83948e-165	0.268875	0.267	0.024	3.1536e-161
CD6	1.90814e-165	0.324095	0.378	0.069	3.27131e-161
ACN9	2.5524e-165	0.284152	0.323	0.044	4.37583e-161
HLA-DRA	3.06571e-165	0.396401	0.596	0.21	5.25586e-161
HNRNPL	5.64147e-165	0.305619	0.388	0.073	9.67174e-161
YWHAH	6.56628e-165	0.270832	0.27	0.025	1.12572e-160
CBWD5	8.21532e-165	0.275776	0.308	0.038	1.40843e-160
ATG12	8.73287e-165	0.317504	0.394	0.076	1.49716e-160
TK1	8.85401e-165	0.266573	0.22	0.01	1.51793e-160
FAM177A1	1.2327e-164	0.287442	0.346	0.054	2.11334e-160
C7orf73	1.75671e-164	0.296122	0.36	0.06	3.01171e-160
SCP2	2.3131e-164	0.285988	0.364	0.061	3.96558e-160
PMAIP1	2.60251e-164	0.260949	0.272	0.026	4.46175e-160
KIF5B	3.24604e-164	0.29444	0.364	0.062	5.56502e-160
EXOSC5	3.67433e-164	0.294484	0.322	0.045	6.29927e-160
RNASEH2B	3.83772e-164	0.301763	0.347	0.055	6.57939e-160
COMMD3	4.93568e-164	0.28411	0.32	0.044	8.46172e-160
SPAG7	5.51424e-164	0.319112	0.393	0.076	9.45362e-160
RFC1	5.89128e-164	0.326782	0.371	0.066	1.01e-159
TCEAL8	6.94127e-164	0.331227	0.399	0.08	1.19001e-159
BID	1.25204e-163	0.261309	0.292	0.033	2.14649e-159
ZNF207	1.27648e-163	0.317651	0.404	0.082	2.18839e-159
SMAP2	1.56566e-163	0.36145	0.444	0.105	2.68418e-159
SCNM1	2.42412e-163	0.299197	0.363	0.062	4.15592e-159
ALG5	2.4648e-163	0.277958	0.33	0.048	4.22565e-159
SSBP4	2.7498e-163	0.254503	0.275	0.027	4.71426e-159
ABT1	2.87562e-163	0.295652	0.346	0.055	4.92997e-159
ZFP36L1	5.18468e-163	0.397774	0.56	0.183	8.88862e-159
ALKBH2	5.52837e-163	0.256037	0.263	0.024	9.47783e-159
EIF2B1	6.70832e-163	0.278165	0.303	0.038	1.15007e-158
CD40LG	1.09877e-162	0.377097	0.26	0.023	1.88373e-158
TAF10	1.10146e-162	0.319013	0.377	0.07	1.88834e-158
THOC3	1.21275e-162	0.278393	0.322	0.045	2.07913e-158
RANGRF	1.31783e-162	0.260741	0.287	0.032	2.2593e-158
NGDN	2.14175e-162	0.299108	0.362	0.063	3.67182e-158
NUBP1	6.47403e-162	0.265574	0.299	0.036	1.10991e-157
MRPS9	7.43459e-162	0.271306	0.295	0.035	1.27459e-157
EIF4B	1.10948e-161	0.313354	0.399	0.081	1.9021e-157
TXNDC9	1.6934e-161	0.263822	0.312	0.041	2.90316e-157
OCIAD1	2.46112e-161	0.31262	0.396	0.079	4.21935e-157
RBM28	3.41996e-161	0.253261	0.275	0.028	5.86318e-157
KIAA1430	5.55845e-161	0.288532	0.349	0.057	9.52941e-157
DDA1	6.21106e-161	0.25583	0.287	0.032	1.06482e-156
CCDC25	7.23723e-161	0.311687	0.344	0.056	1.24075e-156
NUDT22	9.42255e-161	0.267244	0.303	0.038	1.6154e-156
HDGF	9.72119e-161	0.273567	0.297	0.036	1.6666e-156
PSMF1	1.7328e-160	0.288086	0.342	0.054	2.97071e-156
CCNC	2.02207e-160	0.253878	0.293	0.035	3.46664e-156
PYCR2	2.47468e-160	0.276501	0.318	0.045	4.2426e-156
JOSD2	2.50824e-160	0.269212	0.298	0.037	4.30013e-156
ZRANB2	2.56856e-159	0.353918	0.45	0.112	4.40354e-155
IFITM3	4.69918e-159	0.362687	0.415	0.091	8.05628e-155
AP3S1	6.72744e-159	0.261255	0.293	0.035	1.15335e-154
IK	9.64826e-159	0.376837	0.511	0.154	1.6541e-154
LARP7	1.02666e-158	0.310132	0.412	0.088	1.76011e-154
HCLS1	1.03827e-158	0.348124	0.49	0.136	1.78001e-154
SQRDL	1.88482e-158	0.259857	0.286	0.033	3.23134e-154
SNAPC5	3.01788e-158	0.276791	0.317	0.045	5.17385e-154
ANAPC5	3.60319e-158	0.315613	0.373	0.07	6.17732e-154
HINT2	7.20894e-158	0.31318	0.342	0.057	1.2359e-153
LTA4H	8.01797e-158	0.284015	0.321	0.047	1.3746e-153
TWF2	8.17739e-158	0.250795	0.285	0.033	1.40193e-153
MEAF6	8.18611e-158	0.299474	0.375	0.071	1.40343e-153
GRSF1	2.22293e-157	0.284313	0.316	0.045	3.811e-153
GNB1	2.27419e-157	0.28287	0.327	0.05	3.89888e-153
STAU1	2.85775e-157	0.264071	0.311	0.043	4.89933e-153
NINJ1	8.95443e-157	0.313524	0.336	0.054	1.53515e-152
ATP6V1G1	1.55188e-156	0.383877	0.7	0.317	2.66054e-152
CCDC47	1.77441e-156	0.250364	0.277	0.031	3.04205e-152
DDX52	2.20181e-156	0.252262	0.295	0.037	3.77478e-152
ALG13	2.27055e-156	0.254911	0.273	0.029	3.89262e-152
LUC7L3	2.50594e-156	0.36515	0.506	0.148	4.29619e-152
WDR12	3.71537e-156	0.251535	0.28	0.032	6.36963e-152
LRPAP1	3.85922e-156	0.297868	0.36	0.065	6.61625e-152
U2AF2	3.904e-156	0.255968	0.292	0.036	6.69301e-152
MAT2A	6.41888e-156	0.278488	0.302	0.041	1.10045e-151
CNIH4	6.68203e-156	0.285379	0.336	0.054	1.14557e-151
FXR1	6.80349e-156	0.285897	0.332	0.053	1.16639e-151
UBE2B	8.65981e-156	0.341393	0.452	0.115	1.48464e-151
MYH9	1.03624e-155	0.311649	0.393	0.082	1.77654e-151
RTCB	1.0811e-155	0.276866	0.325	0.05	1.85344e-151
IFI6	2.90673e-155	0.571102	0.603	0.238	4.9833e-151
ZC3H13	4.89461e-155	0.282694	0.347	0.059	8.39132e-151
PIN4	5.0066e-155	0.303666	0.363	0.067	8.58332e-151
LSM12	7.50857e-155	0.252763	0.266	0.027	1.28727e-150
ARL14EP	8.00068e-155	0.278606	0.331	0.052	1.37164e-150
DERL2	1.17773e-154	0.253576	0.301	0.04	2.0191e-150
UBA1	2.75688e-154	0.259143	0.312	0.045	4.72639e-150
EIF2S3	2.88604e-154	0.340939	0.44	0.108	4.94782e-150
WDR61	3.13891e-154	0.280841	0.323	0.049	5.38135e-150
EIF2A	3.79192e-154	0.304067	0.372	0.072	6.50087e-150
FAM133B	4.7256e-154	0.338667	0.433	0.105	8.10157e-150
DDX3X	1.08466e-153	0.302632	0.35	0.062	1.85954e-149
WTAP	1.4189e-153	0.334044	0.399	0.087	2.43257e-149
RNMT	2.29023e-153	0.321687	0.417	0.096	3.92637e-149
FDFT1	2.9182e-153	0.312178	0.408	0.091	5.00296e-149
CIAO1	3.77553e-153	0.253474	0.288	0.036	6.47277e-149
CHTOP	3.85509e-153	0.275997	0.309	0.045	6.60917e-149
SRSF5	4.15718e-153	0.402699	0.718	0.351	7.12707e-149
PTGES2	4.51717e-153	0.263356	0.293	0.038	7.74424e-149
NUP62	4.72416e-153	0.251664	0.268	0.029	8.0991e-149
CAPZA2	7.9711e-153	0.283445	0.332	0.054	1.36657e-148
PRPF38B	9.33634e-153	0.340361	0.455	0.118	1.60062e-148
CLINT1	1.5603e-152	0.272525	0.3	0.041	2.67498e-148
VPS35	2.26154e-152	0.310261	0.374	0.074	3.87718e-148
PHAX	2.83207e-152	0.271797	0.325	0.051	4.8553e-148
STK4	4.8833e-152	0.376808	0.512	0.159	8.37192e-148
MPLKIP	4.99955e-152	0.279934	0.357	0.066	8.57122e-148
NSMCE1	5.12059e-152	0.349852	0.43	0.105	8.77873e-148
APOL2	6.78801e-152	0.297873	0.307	0.044	1.16374e-147
S100A10	7.50136e-152	0.363141	0.572	0.204	1.28603e-147
ARPP19	1.05135e-151	0.270529	0.332	0.054	1.80243e-147
MCM2	1.23186e-151	0.252074	0.284	0.035	2.1119e-147
UROS	1.3207e-151	0.251628	0.284	0.035	2.26421e-147
TMEM109	1.34932e-151	0.270597	0.284	0.035	2.31327e-147
S100A4	3.29435e-151	0.427167	0.533	0.176	5.64783e-147
RPUSD3	4.00718e-151	0.253695	0.28	0.034	6.86991e-147
C14orf1	4.6439e-151	0.262292	0.303	0.043	7.96151e-147
XXbac-BPG252P9.9	6.20518e-151	0.313371	0.421	0.1	1.06382e-146
SAFB	7.67095e-151	0.269733	0.316	0.048	1.31511e-146
SCAF11	1.33376e-150	0.360871	0.506	0.154	2.2866e-146
KNOP1	2.05461e-150	0.314716	0.364	0.07	3.52242e-146
ERGIC3	2.07867e-150	0.310768	0.412	0.094	3.56367e-146
CBX5	3.03302e-150	0.256977	0.287	0.037	5.19981e-146
RAD21	3.56789e-150	0.285095	0.361	0.068	6.11679e-146
ZNHIT3	3.66621e-150	0.30561	0.369	0.073	6.28534e-146
CDK11B	5.59873e-150	0.258455	0.29	0.038	9.59847e-146
TERF2IP	6.64565e-150	0.324263	0.389	0.084	1.13933e-145
PGD	1.00526e-149	0.257018	0.314	0.048	1.72341e-145
SREK1	1.31266e-149	0.260018	0.292	0.039	2.25042e-145
DARS	1.87291e-149	0.310587	0.376	0.078	3.21092e-145
SMC5	2.74788e-149	0.252918	0.279	0.034	4.71097e-145
MAP1LC3B	2.81411e-149	0.295668	0.357	0.068	4.82451e-145
NOL8	2.36786e-148	0.258038	0.278	0.034	4.05946e-144
MAZ	4.04285e-148	0.263976	0.292	0.04	6.93106e-144
TYMS	4.81001e-148	0.275262	0.223	0.016	8.24629e-144
2020-09-06	5.25126e-148	0.36551	0.531	0.175	9.00276e-144
C1orf131	1.17788e-147	0.324084	0.384	0.083	2.01936e-143
PIH1D1	1.41966e-147	0.267472	0.33	0.056	2.43386e-143
SKIV2L2	1.81653e-147	0.257741	0.307	0.046	3.11425e-143
NMI	2.35242e-147	0.313872	0.38	0.081	4.033e-143
PDIA4	2.78124e-147	0.284535	0.339	0.06	4.76815e-143
METTL9	4.04564e-147	0.264351	0.327	0.055	6.93585e-143
SMIM7	1.0986e-146	0.256218	0.318	0.051	1.88344e-142
SRPR	1.43396e-146	0.271745	0.313	0.049	2.45838e-142
GZMM	1.83787e-146	0.329543	0.416	0.1	3.15084e-142
NDUFA10	3.97539e-146	0.288923	0.337	0.06	6.81541e-142
CCAR1	4.43837e-146	0.274654	0.314	0.05	7.60914e-142
PSAP	5.14876e-146	0.346726	0.486	0.144	8.82703e-142
C1orf35	5.53432e-146	0.282934	0.314	0.05	9.48803e-142
NCBP2-AS2	1.39776e-145	0.276974	0.344	0.063	2.39631e-141
MBNL1	2.85255e-145	0.350471	0.487	0.148	4.8904e-141
ORMDL1	3.55262e-145	0.349629	0.43	0.112	6.09061e-141
HIF1A	9.70332e-145	0.291354	0.366	0.075	1.66354e-140
ARIH2	9.8667e-145	0.266588	0.311	0.049	1.69155e-140
SMIM11	1.48988e-144	0.278684	0.338	0.061	2.55425e-140
FAM204A	1.78853e-144	0.292194	0.333	0.06	3.06626e-140
JAGN1	1.80591e-144	0.268205	0.335	0.059	3.09604e-140
BRD9	4.58038e-144	0.250939	0.313	0.05	7.8526e-140
ADAR	1.37216e-143	0.337276	0.472	0.137	2.35244e-139
CS	1.72147e-143	0.279319	0.34	0.063	2.95128e-139
IL27RA	2.01806e-143	0.278828	0.339	0.062	3.45976e-139
ARL6IP5	2.12273e-143	0.342554	0.472	0.14	3.63921e-139
RAB5C	2.64264e-143	0.284909	0.344	0.065	4.53054e-139
CD44	1.01763e-142	0.378731	0.568	0.212	1.74463e-138
SMDT1	2.49058e-142	0.37399	0.617	0.254	4.26986e-138
NDUFV3	4.45933e-142	0.256539	0.295	0.044	7.64508e-138
PITPNB	4.66204e-142	0.268714	0.316	0.053	7.99261e-138
UBE2G2	1.05249e-141	0.261468	0.304	0.048	1.80438e-137
ADH5	1.85268e-141	0.255335	0.303	0.047	3.17623e-137
ETS1	3.39847e-141	0.338161	0.44	0.12	5.82634e-137
GBP1	4.57117e-141	0.328769	0.408	0.1	7.83681e-137
SDAD1	6.443e-141	0.263025	0.315	0.052	1.10459e-136
GLTSCR2	1.1958e-140	0.39434	0.768	0.437	2.05008e-136
CFDP1	1.306e-140	0.284641	0.356	0.072	2.239e-136
C10orf54	1.95283e-140	0.274215	0.257	0.03	3.34794e-136
ARID5A	2.52759e-140	0.308274	0.382	0.086	4.3333e-136
RPN1	2.13801e-139	0.27219	0.333	0.062	3.6654e-135
LPXN	1.17128e-138	0.281706	0.347	0.069	2.00804e-134
ADI1	2.0861e-138	0.280889	0.34	0.065	3.57641e-134
SMARCC1	4.01008e-138	0.268906	0.314	0.054	6.87488e-134
PMPCB	1.79568e-137	0.27051	0.335	0.064	3.07851e-133
RAB1B	1.9939e-137	0.280535	0.348	0.07	3.41834e-133
TSTD1	2.46464e-137	0.369426	0.511	0.174	4.22538e-133
OXA1L	3.32878e-137	0.266736	0.343	0.067	5.70686e-133
URI1	5.39494e-137	0.31564	0.382	0.09	9.24909e-133
CTNNBL1	5.49719e-137	0.254601	0.275	0.038	9.42439e-133
SP110	6.29374e-137	0.352005	0.492	0.157	1.079e-132
LARP1	7.50451e-137	0.251264	0.288	0.043	1.28657e-132
GTF2F1	1.2824e-136	0.263181	0.316	0.055	2.19854e-132
MRPL43	2.01292e-136	0.266456	0.316	0.056	3.45094e-132
S100A8	2.67142e-136	0.337544	0.552	0.201	4.57988e-132
SSR1	6.39165e-136	0.268294	0.315	0.056	1.09578e-131
PITHD1	6.43506e-136	0.253877	0.286	0.043	1.10323e-131
COMMD6	6.83363e-136	0.358193	0.848	0.572	1.17156e-131
C17orf62	2.70948e-135	0.275537	0.347	0.071	4.64513e-131
ITGB2	4.64577e-135	0.267579	0.34	0.068	7.96471e-131
CCNI	1.44384e-134	0.347409	0.555	0.206	2.47532e-130
RALBP1	1.47551e-134	0.260551	0.308	0.053	2.52962e-130
CD28	1.61735e-134	0.252685	0.293	0.047	2.77278e-130
GSDMD	3.15613e-134	0.252907	0.288	0.045	5.41086e-130
MX1	4.02376e-134	0.337784	0.371	0.085	6.89834e-130
CNOT7	9.00561e-134	0.277326	0.343	0.07	1.54392e-129
TNFRSF14	1.44549e-133	0.259424	0.326	0.062	2.47814e-129
SAP30BP	2.02914e-133	0.267039	0.317	0.058	3.47877e-129
ADSS	5.28702e-133	0.254565	0.296	0.049	9.06406e-129
M6PR	4.84737e-132	0.250766	0.306	0.053	8.31033e-128
2020-09-09	9.94776e-132	0.318858	0.398	0.102	1.70544e-127
NPC2	1.648e-131	0.309245	0.453	0.135	2.82533e-127
TAX1BP1	5.72983e-131	0.30269	0.414	0.111	9.82322e-127
FLNA	6.11192e-131	0.256191	0.295	0.05	1.04783e-126
SEPW1	1.07634e-130	0.294563	0.373	0.088	1.84528e-126
SDF4	1.77517e-130	0.251321	0.292	0.048	3.04335e-126
THOC2	4.56234e-130	0.257401	0.321	0.061	7.82168e-126
UBALD2	1.15428e-129	0.265394	0.34	0.072	1.9789e-125
PAK2	2.17414e-129	0.265393	0.333	0.068	3.72734e-125
LGALS1	2.61094e-128	0.311223	0.389	0.099	4.4762e-124
ACTR2	3.34112e-128	0.290925	0.38	0.094	5.72801e-124
PPHLN1	2.27738e-127	0.253944	0.324	0.064	3.90435e-123
GABARAPL2	4.44779e-127	0.31274	0.459	0.144	7.62529e-123
CCL22	8.78142e-127	0.288205	0.402	0.107	1.50549e-122
GBP5	1.07016e-126	0.280931	0.355	0.081	1.83469e-122
HEBP2	4.69563e-126	0.262601	0.307	0.058	8.05019e-122
HLA-F	2.37235e-125	0.30142	0.422	0.121	4.06716e-121
ANXA2	4.79373e-125	0.259648	0.34	0.074	8.21838e-121
HERPUD1	4.82305e-125	0.264157	0.314	0.062	8.26864e-121
TNFAIP3	7.6854e-125	0.271056	0.332	0.071	1.31759e-120
TBRG1	2.64955e-124	0.258941	0.305	0.058	4.54239e-120
C14orf119	1.21751e-123	0.269209	0.321	0.066	2.0873e-119
CUTA	1.35804e-123	0.325857	0.54	0.206	2.32823e-119
BRD2	3.44562e-123	0.25684	0.321	0.066	5.90717e-119
HADHA	4.14501e-123	0.264201	0.349	0.08	7.10621e-119
RGS16	9.13135e-123	0.25884	0.215	0.023	1.56548e-118
FAM107B	9.49943e-123	0.320818	0.458	0.147	1.62858e-118
PHF14	1.17772e-122	0.268818	0.325	0.069	2.01909e-118
YTHDC1	3.74049e-122	0.288928	0.389	0.104	6.4127e-118
SERPINB1	4.30045e-122	0.273607	0.356	0.085	7.37268e-118
FAM49B	2.82697e-121	0.268689	0.345	0.08	4.84656e-117
ZC3H8	4.82601e-121	0.276752	0.34	0.077	8.27371e-117
SEC61A1	7.54243e-121	0.252822	0.318	0.066	1.29307e-116
AKR1B1	1.59177e-120	0.28292	0.35	0.084	2.72892e-116
MYCBP2	2.69713e-120	0.285266	0.358	0.087	4.62397e-116
CCDC109B	4.7949e-120	0.305819	0.452	0.144	8.22038e-116
SNRNP200	5.82514e-120	0.256558	0.308	0.062	9.98663e-116
TECR	6.87953e-120	0.311432	0.436	0.135	1.17943e-115
CDKN2D	5.82968e-119	0.263497	0.259	0.041	9.9944e-115
CCL2	7.62468e-119	0.309054	0.467	0.156	1.30718e-114
NKG7	5.25195e-118	0.274119	0.346	0.083	9.00395e-114
KIF2A	8.20426e-118	0.276228	0.37	0.096	1.40654e-113
IDH2	3.29185e-117	0.2507	0.272	0.047	5.64355e-113
TMEM261	4.51777e-117	0.264786	0.345	0.082	7.74526e-113
[truncated: 45 more rows]

## Sheet: CD4T_Mem_AntiCD3
	p_val	avg_logFC	pct.1	pct.2	p_val_adj
CITE-CD69-GTCTCTTGGCTTAAA	0	2.74446	1	0.995	0
CITE-CD25-TTTGTCCTGTACGCC	0	1.8583	0.999	0.996	0
TXN	0	1.36767	0.832	0.325	0
CITE-CD278-ICOS-CGCGCACCCATTAAA	0	1.36017	1	1	0
TNFRSF4	0	1.33059	0.642	0.083	0
GAPDH	0	1.30873	0.942	0.662	0
HSP90AB1	0	1.29191	0.941	0.538	0
IL2RA	0	1.28155	0.697	0.141	0
HSPE1	0	1.24781	0.787	0.315	0
HSP90AA1	0	1.20803	0.874	0.408	0
ENO1	0	1.17192	0.917	0.463	0
MIF	0	1.13668	0.924	0.58	0
NPM1	0	1.10852	0.946	0.719	0
ACTG1	0	1.10281	0.922	0.483	0
PSME2	0	1.08531	0.874	0.354	0
TUBA1B	0	1.07877	0.824	0.356	0
TMSB10	0	1.06583	0.995	0.95	0
EIF4A1	0	1.05825	0.847	0.436	0
CHCHD2	0	1.02817	0.848	0.418	0
ACTB	0	1.02218	0.997	0.963	0
SNRPG	0	0.987409	0.802	0.305	0
PFN1	0	0.981258	0.971	0.804	0
SUB1	0	0.976629	0.848	0.316	0
PSMA7	0	0.961421	0.81	0.335	0
RPL37A	0	0.958187	0.997	0.976	0
H3F3B	0	0.949758	0.928	0.636	0
POMP	0	0.944054	0.763	0.237	0
RPS24	0	0.932073	0.974	0.883	0
NME1-NME2	0	0.930069	0.744	0.227	0
RBM8A	0	0.929481	0.744	0.225	0
RPLP0	0	0.927816	0.982	0.886	0
HNRNPA1	0	0.9261	0.929	0.613	0
PTMA	0	0.922182	0.995	0.981	0
MYL6	0	0.90461	0.939	0.656	0
PSME1	0	0.882248	0.906	0.456	0
PSMB3	0	0.877381	0.771	0.236	0
CITE-CD38-ATCCTTTGCCGTGTT	0	0.846549	1	1	0
CFL1	0	0.840974	0.918	0.598	0
RPSA	0	0.816587	0.955	0.774	0
RPS5	0	0.811325	0.978	0.93	0
RPS2	0	0.796874	0.997	0.994	0
RPL15	0	0.789316	0.984	0.966	0
CLIC1	0	0.789061	0.706	0.185	0
COX6A1	0	0.788202	0.791	0.292	0
AC017002.1	0	0.752905	0.559	0.042	0
RPL28	0	0.746353	0.995	0.986	0
RPS9	0	0.725081	0.987	0.963	0
RPLP1	0	0.72188	0.999	0.999	0
RPS23	0	0.720495	0.993	0.988	0
B2M	0	0.71447	1	1	0
RPL18A	0	0.690484	0.995	0.996	0
HLA-B	0	0.69038	0.989	0.898	0
EEF1A1	0	0.622542	0.995	0.993	0
UBB	6.98925e-308	0.860021	0.843	0.43	1.19824e-303
PRDX1	7.99538e-308	0.886657	0.709	0.2	1.37073e-303
COX6A1P2	2.24384e-307	0.68761	0.702	0.183	3.84684e-303
NME1	4.03184e-307	0.937248	0.621	0.114	6.91219e-303
YBX1	1.27531e-306	1.07754	0.893	0.538	2.18639e-302
RPS8	1.5831e-306	0.730263	0.993	0.984	2.71406e-302
TPI1	2.08871e-306	0.989521	0.826	0.388	3.58088e-302
ATP5E	6.6805e-306	0.800356	0.939	0.744	1.1453e-301
DDX21	6.7734e-304	0.878152	0.657	0.147	1.16123e-299
BATF	2.69534e-303	0.711232	0.588	0.087	4.62089e-299
RPS15	2.45429e-302	0.622699	0.994	0.996	4.20764e-298
RPSAP58	2.72252e-302	0.818789	0.922	0.656	4.66748e-298
HSPA8	9.68324e-302	0.841451	0.852	0.452	1.66009e-297
RPL7A	3.63622e-301	0.880166	0.951	0.792	6.23393e-297
RPL10	7.54382e-301	0.561879	0.998	0.999	1.29331e-296
SERF2	9.81423e-301	0.700424	0.936	0.725	1.68255e-296
PPIA	1.04523e-299	0.866992	0.885	0.528	1.79195e-295
HNRNPM	2.83619e-299	0.787493	0.727	0.225	4.86236e-295
PSMB1	8.56959e-299	0.840049	0.762	0.277	1.46917e-294
MT-CO2	1.16338e-298	0.704442	0.985	0.916	1.9945e-294
RAN	2.12046e-298	1.10242	0.817	0.396	3.63532e-294
PKM	8.43103e-298	0.864935	0.773	0.3	1.44542e-293
RPL5	1.6823e-296	0.855349	0.949	0.81	2.88414e-292
COX7A2	8.00191e-296	0.807644	0.833	0.418	1.37185e-291
UQCRQ	1.56392e-294	0.917908	0.767	0.296	2.68118e-290
HLA-A	8.05158e-294	0.678554	0.964	0.836	1.38036e-289
RPL12	2.24803e-293	0.616756	0.982	0.975	3.85402e-289
RPS19	1.58506e-289	0.632791	0.999	0.999	2.71743e-285
RPS12	1.95206e-288	0.62677	0.986	0.995	3.34661e-284
EIF5A	3.35035e-288	1.00782	0.692	0.204	5.74384e-284
SRSF3	1.70605e-287	0.754686	0.677	0.18	2.92486e-283
GNB2L1	1.7947e-285	0.773727	0.964	0.83	3.07684e-281
RPL23	4.62571e-285	0.862422	0.945	0.782	7.93032e-281
SERBP1	1.99422e-284	1.07169	0.727	0.257	3.41889e-280
LDHA	1.83241e-283	0.979182	0.798	0.367	3.14148e-279
SRP14	1.98439e-283	0.802974	0.874	0.551	3.40204e-279
SLIRP	9.14695e-283	0.92273	0.665	0.179	1.56815e-278
RPS29	3.47052e-282	0.527911	0.997	1	5.94987e-278
RPL27	3.57303e-282	0.766722	0.975	0.913	6.12561e-278
EIF5B	1.07919e-281	0.744933	0.713	0.227	1.85017e-277
PSMA4	2.53316e-281	0.608794	0.618	0.125	4.34285e-277
RPS21	9.07921e-281	0.725642	0.979	0.944	1.55654e-276
RANBP1	1.1696e-280	0.909745	0.686	0.205	2.00516e-276
GNG5	7.52377e-280	0.630792	0.667	0.171	1.28988e-275
PPA1	1.80116e-279	0.799372	0.655	0.172	3.08791e-275
NOP10	2.10689e-279	0.790543	0.702	0.217	3.61205e-275
RPL26	4.22369e-279	0.695886	0.986	0.987	7.24109e-275
RPL39	8.59643e-279	0.570404	0.99	0.995	1.47377e-274
RPL35	2.53874e-278	0.758026	0.989	0.986	4.35242e-274
ALDOA	7.57975e-278	0.878098	0.834	0.441	1.29947e-273
RPS18	7.62675e-278	0.665644	0.999	0.999	1.30753e-273
DNAJA1	1.55588e-277	0.708107	0.619	0.136	2.6674e-273
NDUFA13	3.88959e-277	0.737473	0.778	0.324	6.66832e-273
RPL36A	4.47785e-277	0.721193	0.973	0.937	7.67682e-273
RPS26	2.12756e-276	0.947663	0.953	0.782	3.64749e-272
HSPD1	3.78241e-276	0.969942	0.711	0.234	6.48456e-272
NDUFA4	7.2498e-276	0.800479	0.81	0.407	1.24291e-271
PGAM1	9.83804e-274	0.868657	0.657	0.18	1.68663e-269
RPL6	1.12939e-273	0.772512	0.972	0.92	1.93623e-269
CYCS	1.75772e-273	0.894174	0.645	0.169	3.01344e-269
POLR2L	3.41092e-273	0.832501	0.756	0.313	5.84768e-269
SNRPD1	2.40773e-272	0.864948	0.667	0.193	4.12782e-268
PSMB9	1.15185e-270	0.672847	0.774	0.311	1.97474e-266
NDUFV2	1.2612e-270	0.780211	0.675	0.2	2.1622e-266
RPL24	1.54749e-270	0.744637	0.951	0.845	2.65302e-266
EIF2S2	2.34886e-270	0.803339	0.724	0.257	4.02688e-266
COX17	7.51397e-270	0.748217	0.645	0.17	1.28819e-265
RBX1	1.09197e-269	0.693618	0.733	0.265	1.87207e-265
SNRPF	1.21479e-269	0.821272	0.686	0.214	2.08263e-265
COX7B	3.7737e-269	0.722068	0.731	0.268	6.46964e-265
EEF1B2	1.66741e-268	0.749133	0.89	0.613	2.85861e-264
USMG5	1.68674e-268	0.868009	0.762	0.327	2.89174e-264
CALR	5.61594e-268	0.707931	0.638	0.157	9.62796e-264
SEC61G	1.57983e-267	0.809257	0.702	0.241	2.70846e-263
LY6E	2.85103e-267	0.702218	0.762	0.299	4.8878e-263
RPL10A	4.60822e-267	0.640576	0.97	0.936	7.90034e-263
RPL29	1.41154e-266	0.749108	0.977	0.938	2.41994e-262
RPS7	3.05781e-266	0.800219	0.966	0.911	5.24231e-262
RPS6	4.23512e-266	0.618342	0.997	0.994	7.26069e-262
EIF5AL1	9.82883e-266	0.778946	0.528	0.076	1.68505e-261
RPS11	1.29134e-265	0.776412	0.957	0.854	2.21387e-261
RPL19	1.46415e-265	0.638975	0.993	0.99	2.51014e-261
HLA-C	2.11718e-265	0.611417	0.97	0.843	3.62969e-261
NCL	2.62487e-265	1.06216	0.811	0.422	4.50008e-261
RPS25	1.03166e-264	0.567853	0.989	0.991	1.76867e-260
RPS13	3.46501e-264	0.644187	0.986	0.981	5.94041e-260
SEC61B	7.70055e-264	0.804716	0.692	0.231	1.32018e-259
RPL9	1.13105e-263	0.674568	0.966	0.932	1.93907e-259
RPL27A	2.95614e-263	0.61916	0.99	0.988	5.06801e-259
CD3D	3.01223e-263	0.685125	0.864	0.521	5.16417e-259
RPL14	7.61409e-263	0.697461	0.984	0.943	1.30536e-258
TCEB2	4.86125e-262	0.740009	0.82	0.45	8.33412e-258
RPL41	1.04397e-261	0.587428	0.999	0.999	1.78978e-257
HNRNPA2B1	1.46758e-261	0.73433	0.757	0.313	2.51602e-257
PSMA5	8.18127e-261	0.677911	0.631	0.16	1.4026e-256
TUBB	1.33352e-260	0.82835	0.727	0.275	2.28619e-256
RPL8	4.85365e-260	0.684974	0.988	0.956	8.3211e-256
RPL11	1.47687e-259	0.558705	0.993	0.994	2.53194e-255
COX6C	1.87426e-259	0.665788	0.806	0.411	3.21324e-255
PRMT1	1.87583e-259	0.749383	0.607	0.141	3.21593e-255
PHB	1.94951e-259	0.678167	0.584	0.12	3.34224e-255
APRT	4.14374e-259	0.808167	0.786	0.372	7.10403e-255
PSMB10	2.99959e-258	0.568551	0.666	0.186	5.1425e-254
SLC25A6	3.3367e-258	0.733446	0.836	0.466	5.72043e-254
NDUFAB1	7.91005e-258	0.728547	0.62	0.158	1.3561e-253
GADD45GIP1	2.58374e-257	0.668703	0.635	0.165	4.42956e-253
SNRPE	3.57672e-257	0.900309	0.699	0.254	6.13193e-253
C1QBP	3.80973e-257	0.918764	0.692	0.239	6.53139e-253
NHP2	5.8692e-257	0.738053	0.628	0.166	1.00622e-252
PA2G4	6.74582e-257	0.944399	0.701	0.254	1.1565e-252
EIF1	6.37784e-256	0.78887	0.948	0.805	1.09342e-251
SOD1	1.91025e-255	0.681509	0.789	0.366	3.27494e-251
TYMP	1.95509e-255	0.659626	0.623	0.155	3.35181e-251
RPLP2	2.13419e-255	0.546614	0.993	0.995	3.65886e-251
PSMB6	2.37376e-255	0.695493	0.63	0.166	4.06957e-251
ATP5J2	3.68407e-255	0.763818	0.717	0.273	6.31597e-251
FAM96B	7.36199e-255	0.623483	0.594	0.132	1.26214e-250
COX5A	8.5966e-255	0.70134	0.645	0.183	1.4738e-250
TNFRSF18	1.97082e-254	0.758028	0.462	0.045	3.37878e-250
RPL7	2.19033e-254	0.658652	0.984	0.979	3.75509e-250
ARPC2	3.24418e-254	0.699763	0.796	0.4	5.56183e-250
MANF	4.1223e-254	0.712546	0.582	0.125	7.06727e-250
NBEAL1	5.8272e-254	0.585937	0.943	0.913	9.99015e-250
PSMA3	7.29845e-254	0.658405	0.587	0.13	1.25125e-249
TXNDC17	7.62621e-254	0.639484	0.532	0.086	1.30744e-249
NFKBIA	8.97736e-254	0.723592	0.634	0.164	1.53908e-249
ERH	1.37895e-253	0.77112	0.685	0.229	2.36408e-249
RPS27A	5.23296e-253	0.547752	0.995	0.995	8.97138e-249
PARK7	2.25985e-252	0.739247	0.715	0.275	3.87429e-248
RPL37	2.35714e-252	0.723538	0.987	0.974	4.04107e-248
BST2	3.5385e-252	0.603017	0.597	0.133	6.06641e-248
NACA	2.40856e-251	0.743227	0.922	0.756	4.12923e-247
RPS28	3.70763e-251	0.559036	0.993	0.996	6.35636e-247
HNRNPDL	3.72509e-251	0.652067	0.728	0.275	6.3863e-247
ATP5G1	4.70054e-251	0.642376	0.606	0.145	8.05861e-247
SLC25A5	1.30838e-250	0.79048	0.68	0.228	2.24309e-246
OAZ1	4.03353e-250	0.79504	0.886	0.606	6.91509e-246
PSMA1	1.26801e-249	0.640171	0.579	0.125	2.17388e-245
FAU	1.97554e-249	0.683061	0.979	0.934	3.38687e-245
MRPL52	5.09294e-249	0.683205	0.581	0.129	8.73134e-245
DYNLL1	2.35484e-248	0.73208	0.663	0.213	4.03713e-244
ATP5G3	3.271e-248	0.78529	0.694	0.243	5.6078e-244
SSBP1	9.07738e-248	0.746792	0.654	0.199	1.55623e-243
SNRPB	1.22389e-247	0.759003	0.64	0.186	2.09824e-243
ROMO1	3.49777e-247	0.601809	0.632	0.169	5.99657e-243
RPS16	1.19942e-246	0.710246	0.983	0.968	2.05628e-242
UBE2L3	9.91287e-246	0.65714	0.62	0.164	1.69946e-241
LINC00152	1.61116e-245	0.645541	0.519	0.084	2.76217e-241
PSMD8	5.77777e-245	0.618726	0.587	0.135	9.90541e-241
TCEB1	7.39338e-245	0.661207	0.566	0.122	1.26752e-240
MT-ND4	2.25118e-244	0.647264	0.943	0.771	3.85943e-240
RPL22	5.49827e-244	0.639847	0.937	0.84	9.42623e-240
ARPC3	6.84713e-244	0.619353	0.767	0.346	1.17387e-239
ATP5L	1.03354e-243	0.709019	0.883	0.607	1.7719e-239
GSTP1	2.34853e-243	0.726905	0.672	0.231	4.02631e-239
RPL13A	2.58559e-243	0.576218	0.998	0.998	4.43273e-239
RPL4	1.6938e-242	0.686429	0.943	0.788	2.90384e-238
MT-ATP6	2.76307e-242	0.640391	0.928	0.715	4.73701e-238
BTF3	5.91211e-242	0.717916	0.908	0.72	1.01357e-237
NDUFB2	1.71492e-241	0.663872	0.69	0.241	2.94007e-237
PPIB	3.91223e-241	0.697625	0.713	0.28	6.70713e-237
TMA7	6.43746e-241	0.760772	0.929	0.752	1.10364e-236
RPS4X	1.61617e-240	0.557959	0.993	0.99	2.77076e-236
RPL17	1.74804e-240	0.732047	0.96	0.937	2.99684e-236
IL32	1.28764e-239	1.04696	0.899	0.715	2.20752e-235
SET	1.6561e-238	0.846021	0.748	0.337	2.83921e-234
RPL23A	1.79e-238	0.520805	0.989	0.994	3.06878e-234
PSMB8	5.51009e-238	0.677089	0.677	0.229	9.4465e-234
TPM3	1.66184e-237	0.656331	0.722	0.284	2.84906e-233
UBA52	1.69244e-237	0.636299	0.966	0.905	2.90152e-233
RPL13	2.12678e-236	0.501085	0.999	0.999	3.64615e-232
SRM	4.17822e-236	0.779708	0.584	0.146	7.16313e-232
SHFM1	4.59279e-236	0.712786	0.667	0.232	7.87388e-232
MT-ND5	5.12117e-236	0.712714	0.797	0.435	8.77974e-232
RPS3A	3.12597e-235	0.61539	0.982	0.968	5.35916e-231
TRMT112	3.85264e-235	0.750709	0.716	0.295	6.60497e-231
SUMO2	6.05216e-235	0.702302	0.733	0.315	1.03758e-230
RPL18	6.22083e-235	0.620214	0.978	0.948	1.0665e-230
HMGN1	1.29663e-234	0.64775	0.683	0.24	2.22294e-230
COX6B1	8.39509e-234	0.689728	0.814	0.443	1.43925e-229
RBM3	8.45163e-234	0.579615	0.645	0.196	1.44895e-229
NDUFS6	1.37476e-233	0.645072	0.59	0.151	2.35689e-229
CCT6A	4.64265e-233	0.68608	0.539	0.112	7.95936e-229
RPL21	6.45368e-232	0.477225	0.995	0.999	1.10642e-227
YWHAE	1.74386e-231	0.577768	0.551	0.116	2.98968e-227
RPS20	1.82082e-231	0.586676	0.966	0.959	3.12162e-227
PSMB2	3.32935e-231	0.635618	0.538	0.111	5.70784e-227
MIR155HG	6.94652e-231	0.953103	0.519	0.099	1.19091e-226
UBL5	1.74179e-230	0.647389	0.772	0.388	2.98612e-226
TUBB4B	2.58008e-230	0.493351	0.454	0.054	4.42329e-226
SNRPB2	6.66057e-230	0.601494	0.59	0.154	1.14189e-225
NDUFC2	7.85916e-230	0.602615	0.613	0.174	1.34737e-225
RPL36	8.61313e-230	0.602543	0.993	0.995	1.47664e-225
CD2	2.44853e-229	0.742605	0.751	0.36	4.19775e-225
RPL32	1.24085e-228	0.489315	0.991	0.998	2.12731e-224
HNRNPC	3.52771e-228	0.674732	0.685	0.259	6.04791e-224
PFDN2	3.68079e-228	0.7269	0.576	0.144	6.31035e-224
DRAP1	2.15634e-227	0.519738	0.649	0.2	3.69683e-223
PSMD14	5.10379e-226	0.516551	0.47	0.067	8.74993e-222
LAMTOR5	2.24993e-225	0.589259	0.62	0.181	3.85728e-221
PSMC3	3.87088e-225	0.580224	0.536	0.113	6.63624e-221
NDUFS5	1.16111e-224	0.663829	0.74	0.342	1.99061e-220
CALM2	1.61226e-224	0.685909	0.771	0.387	2.76405e-220
RPL35A	2.51526e-224	0.582687	0.984	0.988	4.31216e-220
TIMM13	2.5662e-224	0.679182	0.568	0.143	4.39949e-220
MRPL23	1.5889e-222	0.604716	0.57	0.143	2.724e-218
CD63	6.7965e-222	0.585178	0.567	0.139	1.16519e-217
PRELID1	1.67858e-221	0.723396	0.629	0.203	2.87776e-217
VDAC1	2.6515e-221	0.577179	0.497	0.087	4.54573e-217
HSP90B1	2.9464e-221	0.599913	0.65	0.214	5.05131e-217
MT-CO1	2.97282e-221	0.596058	0.979	0.918	5.0966e-217
PSMB7	7.09287e-221	0.595659	0.547	0.125	1.216e-216
MRPL20	7.57529e-221	0.67689	0.622	0.195	1.29871e-216
NHP2L1	7.74189e-221	0.757449	0.663	0.246	1.32727e-216
FTL	2.24185e-220	0.66624	0.982	0.956	3.84342e-216
UQCRH	2.86602e-220	0.646392	0.69	0.277	4.91351e-216
CD74	4.9506e-220	0.551226	0.867	0.557	8.48731e-216
RPL22L1	7.32707e-220	0.645509	0.522	0.107	1.25615e-215
SLC25A3	2.31953e-219	0.586747	0.601	0.171	3.97661e-215
COX7C	3.07515e-219	0.648055	0.891	0.697	5.27203e-215
DBI	3.78594e-219	0.609023	0.626	0.204	6.49061e-215
UBE2N	8.61493e-219	0.502975	0.503	0.092	1.47694e-214
C19orf10	1.24042e-218	0.58128	0.531	0.114	2.12658e-214
CORO1A	4.2834e-218	0.674002	0.756	0.371	7.34345e-214
SELK	9.21028e-218	0.57185	0.599	0.168	1.57901e-213
TMEM258	4.3462e-217	0.647304	0.758	0.368	7.45113e-213
ATP5J	4.61589e-217	0.700202	0.668	0.26	7.91349e-213
FABP5	2.40886e-216	0.977809	0.582	0.167	4.12975e-212
RPS3	3.68903e-216	0.597683	0.994	0.994	6.32447e-212
SRSF9	4.42661e-216	0.612987	0.623	0.196	7.58897e-212
COX5B	4.88173e-216	0.591847	0.732	0.334	8.36924e-212
TPT1	7.20541e-216	0.474436	0.961	0.914	1.2353e-211
EIF3J	8.07758e-216	0.703318	0.574	0.154	1.38482e-211
ATP5I	1.12961e-215	0.731597	0.787	0.435	1.9366e-211
RPS14	2.45502e-215	0.479401	0.997	0.999	4.20888e-211
METAP2	1.43369e-214	0.63251	0.578	0.158	2.45791e-210
STAT1	3.54498e-214	0.450723	0.597	0.158	6.07751e-210
XRCC5	4.37654e-214	0.604341	0.591	0.169	7.50314e-210
C19orf70	7.95082e-214	0.528206	0.597	0.169	1.36309e-209
NDUFA1	1.03008e-213	0.58391	0.727	0.335	1.76597e-209
SNRPD2	1.90878e-213	0.668096	0.819	0.504	3.27241e-209
SRSF7	2.6393e-213	0.611698	0.641	0.219	4.52481e-209
TAP1	3.1196e-213	0.500267	0.522	0.109	5.34825e-209
PSMC1	2.1007e-212	0.521424	0.483	0.085	3.60144e-208
CFLAR	3.2402e-212	0.540044	0.549	0.13	5.555e-208
MINOS1	6.87791e-212	0.648631	0.652	0.237	1.17915e-207
PHPT1	3.68879e-211	0.461208	0.503	0.096	6.32407e-207
RPS10	4.9882e-211	0.700439	0.933	0.838	8.55178e-207
C19orf53	7.18588e-211	0.621171	0.673	0.261	1.23195e-206
C14orf2	2.76099e-210	0.618938	0.718	0.327	4.73343e-206
BOLA3	3.5629e-210	0.503815	0.443	0.063	6.10824e-206
CACYBP	3.60554e-210	0.607324	0.545	0.133	6.18134e-206
FKBP1A	1.62181e-209	0.509818	0.507	0.103	2.78043e-205
CBX3	3.20016e-209	0.703044	0.662	0.251	5.48635e-205
TOMM22	3.23814e-209	0.599088	0.516	0.111	5.55146e-205
ENY2	3.46629e-209	0.513991	0.53	0.121	5.94261e-205
TBCA	4.37521e-209	0.678474	0.688	0.289	7.50086e-205
PDIA6	1.90992e-208	0.530291	0.508	0.104	3.27437e-204
SDF2L1	1.0551e-207	0.604093	0.524	0.121	1.80886e-203
SAP18	4.05775e-207	0.586461	0.661	0.249	6.95661e-203
NDUFB7	6.71113e-207	0.546332	0.583	0.168	1.15056e-202
PSMD7	1.17392e-206	0.542647	0.491	0.094	2.01256e-202
CCND2	1.23345e-206	0.574137	0.476	0.086	2.11462e-202
LTA	2.51289e-206	1.12007	0.559	0.155	4.30809e-202
LSM7	6.9339e-206	0.63001	0.621	0.214	1.18875e-201
GNL3	3.92325e-205	0.50475	0.462	0.076	6.72601e-201
NEDD8	4.68287e-205	0.620001	0.666	0.259	8.02832e-201
YWHAB	1.85901e-204	0.580642	0.702	0.309	3.18709e-200
ATP5D	3.31201e-204	0.624159	0.695	0.301	5.6781e-200
ATP5B	7.93639e-204	0.602099	0.654	0.241	1.36061e-199
DDX18	1.18333e-203	0.616326	0.646	0.232	2.0287e-199
UBE2D3	2.54148e-203	0.593649	0.638	0.226	4.35712e-199
ATOX1	8.21481e-203	0.491756	0.461	0.078	1.40835e-198
C11orf48	8.50193e-203	0.50586	0.475	0.087	1.45757e-198
HINT1	9.58824e-203	0.685219	0.853	0.623	1.64381e-198
PSMB5	5.73791e-202	0.585512	0.477	0.091	9.83708e-198
ARPC1B	6.09995e-202	0.565363	0.634	0.224	1.04578e-197
SSSCA1	6.35268e-202	0.487215	0.435	0.062	1.0891e-197
GTF3C6	1.23531e-201	0.502715	0.486	0.095	2.11782e-197
HNRNPAB	1.71349e-201	0.623379	0.523	0.124	2.93761e-197
TOMM5	3.30855e-201	0.736013	0.557	0.157	5.67218e-197
LMAN1	1.61634e-200	0.444192	0.465	0.08	2.77106e-196
CCT5	1.8636e-200	0.552886	0.486	0.098	3.19495e-196
IFI6	7.27881e-200	0.620828	0.632	0.208	1.24788e-195
CCT2	8.71005e-200	0.545447	0.481	0.095	1.49325e-195
SKP1	1.12862e-199	0.569896	0.719	0.335	1.9349e-195
NDUFA11	5.06161e-199	0.536441	0.632	0.223	8.67763e-195
EIF1AX	5.93846e-199	0.569378	0.511	0.116	1.01809e-194
MRPL41	8.96465e-199	0.584787	0.567	0.163	1.5369e-194
AURKAIP1	1.29814e-198	0.567149	0.557	0.154	2.22554e-194
BANF1	2.0885e-198	0.472979	0.507	0.111	3.58053e-194
CCT8	2.17149e-198	0.538216	0.507	0.114	3.72281e-194
PPP1R14B	4.6816e-198	0.513324	0.425	0.062	8.02614e-194
RPS15A	4.86888e-198	0.44516	0.99	0.996	8.3472e-194
SRGN	6.81079e-198	0.736276	0.662	0.274	1.16764e-193
CALM3	7.42943e-198	0.468897	0.549	0.143	1.2737e-193
BZW1	9.90346e-198	0.484795	0.486	0.097	1.69785e-193
EBNA1BP2	1.29837e-197	0.519968	0.437	0.068	2.22593e-193
COX8A	1.44949e-197	0.561081	0.628	0.223	2.48501e-193
SRSF2	1.51652e-197	0.569329	0.538	0.139	2.59993e-193
RPL31	6.22621e-197	0.459031	0.984	0.993	1.06742e-192
DDX39A	8.71718e-197	0.54471	0.497	0.107	1.49447e-192
NDUFB3	1.97636e-196	0.497609	0.519	0.124	3.38828e-192
ARPC5L	2.69285e-196	0.539069	0.509	0.116	4.61661e-192
PGK1	4.74161e-196	0.582584	0.614	0.212	8.12901e-192
S100A6	1.5474e-195	0.787235	0.829	0.549	2.65287e-191
OST4	3.68771e-195	0.580141	0.841	0.592	6.32222e-191
SF3B14	4.86267e-195	0.551056	0.58	0.175	8.33657e-191
NPM3	8.43389e-195	0.487683	0.404	0.051	1.44591e-190
NUTF2	1.07983e-194	0.466431	0.47	0.091	1.85127e-190
ATP6V0E1	1.72055e-194	0.567074	0.671	0.279	2.94971e-190
EIF6	3.04286e-194	0.533436	0.496	0.11	5.21668e-190
HSPA5	4.06328e-194	0.518759	0.511	0.12	6.96609e-190
RAC2	8.01878e-194	0.50128	0.603	0.194	1.37474e-189
DDIT4	1.24359e-193	0.485249	0.388	0.043	2.13201e-189
ZNF593	4.00251e-193	0.502214	0.422	0.063	6.8619e-189
WDR43	5.23086e-193	0.568476	0.482	0.102	8.96779e-189
TPM4	8.16707e-193	0.462122	0.427	0.065	1.40016e-188
PDCD5	9.24078e-193	0.610157	0.516	0.131	1.58424e-188
MAGOH	2.05122e-192	0.521938	0.532	0.138	3.51662e-188
NUDC	2.42269e-192	0.561154	0.519	0.129	4.15346e-188
PTGES3	9.05887e-192	0.550191	0.536	0.142	1.55305e-187
CYC1	3.55893e-191	0.471876	0.445	0.076	6.10142e-187
CCT4	7.70214e-191	0.517345	0.491	0.109	1.32046e-186
GBP2	6.12952e-190	0.419509	0.521	0.124	1.05085e-185
SEC11C	6.19556e-190	0.531943	0.505	0.122	1.06217e-185
CMSS1	1.92101e-189	0.519675	0.438	0.074	3.29338e-185
LSM3	6.44672e-189	0.526441	0.528	0.143	1.10523e-184
C4orf48	1.16426e-188	0.483596	0.509	0.123	1.99601e-184
RPL3	1.60071e-188	0.471478	0.991	0.989	2.74425e-184
MRPL12	3.28752e-188	0.578655	0.419	0.066	5.63613e-184
SOCS1	4.48707e-188	0.391691	0.385	0.044	7.69263e-184
RPL38	4.86675e-188	0.627665	0.964	0.947	8.34355e-184
MRPL51	6.10428e-188	0.527102	0.532	0.145	1.04652e-183
IRF1	1.00322e-187	0.475729	0.548	0.151	1.71993e-183
ILF2	1.10475e-187	0.521977	0.484	0.107	1.89398e-183
HNRNPA3	3.34798e-187	0.473026	0.556	0.161	5.73978e-183
ISG20	4.23193e-187	0.585991	0.694	0.316	7.25522e-183
CSNK2B	5.30144e-187	0.461203	0.47	0.097	9.08879e-183
LSM6	5.58596e-187	0.481333	0.499	0.118	9.57657e-183
DCTPP1	6.35828e-187	0.519384	0.447	0.083	1.09006e-182
NDUFA3	6.74488e-187	0.529517	0.694	0.317	1.15634e-182
ADRM1	1.00692e-186	0.490862	0.473	0.099	1.72626e-182
MYL12B	1.85717e-186	0.545899	0.742	0.392	3.18393e-182
ABCF1	7.78433e-186	0.502913	0.491	0.114	1.33455e-181
NDUFA6	1.50548e-185	0.510495	0.536	0.147	2.581e-181
HNRNPA1L2	2.40964e-185	0.401361	0.436	0.074	4.13109e-181
HN1	8.26381e-185	0.494999	0.429	0.073	1.41675e-180
NOL7	1.32235e-184	0.533104	0.52	0.137	2.26703e-180
ZNF706	1.47473e-184	0.537829	0.552	0.164	2.52827e-180
C20orf24	1.56041e-184	0.48216	0.445	0.082	2.67516e-180
GUK1	2.14757e-184	0.519171	0.609	0.216	3.68179e-180
PDAP1	7.68601e-184	0.52183	0.463	0.096	1.31769e-179
ANAPC11	8.20361e-184	0.481437	0.502	0.12	1.40643e-179
EDF1	9.21243e-184	0.524722	0.714	0.351	1.57938e-179
ZBED2	2.83835e-183	0.598213	0.379	0.047	4.86607e-179
GRPEL1	3.86673e-183	0.453783	0.418	0.066	6.62913e-179
NDUFB4	4.25781e-183	0.469963	0.596	0.201	7.29959e-179
SRI	9.81121e-183	0.518653	0.521	0.138	1.68203e-178
EIF3I	1.20306e-182	0.553135	0.528	0.149	2.06252e-178
DDX1	1.60553e-182	0.491506	0.451	0.088	2.75251e-178
WARS	2.34399e-182	0.485073	0.559	0.171	4.01854e-178
TIMM8B	2.61477e-182	0.516688	0.475	0.106	4.48276e-178
EMP3	7.01909e-182	0.666837	0.756	0.445	1.20335e-177
PDIA3	1.28926e-181	0.481004	0.561	0.171	2.21031e-177
SNRPA1	2.08081e-181	0.543067	0.476	0.107	3.56734e-177
RPA3	2.18259e-181	0.454019	0.456	0.091	3.74183e-177
SNRPD3	3.40757e-181	0.516601	0.511	0.133	5.84194e-177
EEF1E1	6.18335e-181	0.489923	0.421	0.072	1.06007e-176
RNF181	3.75099e-180	0.429713	0.497	0.119	6.43069e-176
TUFM	5.01918e-180	0.551686	0.505	0.132	8.60488e-176
ABRACL	5.19657e-180	0.519457	0.584	0.195	8.909e-176
MT-ND2	7.7335e-180	0.590752	0.899	0.729	1.32583e-175
RBMX	9.34536e-180	0.544023	0.596	0.21	1.60217e-175
MRPL14	9.57176e-180	0.45842	0.448	0.088	1.64098e-175
U2AF1	1.22552e-179	0.596772	0.594	0.217	2.10103e-175
NDUFAF3	1.27291e-179	0.444166	0.486	0.113	2.18228e-175
MT1X	1.87181e-179	0.560389	0.5	0.127	3.20904e-175
NDUFB11	5.23685e-179	0.514892	0.621	0.238	8.97805e-175
MRPS12	6.51081e-179	0.499963	0.443	0.087	1.11621e-174
HNRNPF	7.68168e-179	0.451721	0.522	0.139	1.31695e-174
POLR2H	8.30849e-179	0.451562	0.386	0.053	1.42441e-174
TIMM10	1.52255e-178	0.455309	0.416	0.07	2.61025e-174
CITE-CD279-PD1-ACAGCGCCGTATTTA	2.47307e-178	0.595092	1	0.998	4.23984e-174
NOP16	2.7648e-178	0.51224	0.422	0.074	4.73998e-174
MT-ND1	5.42378e-178	0.630949	0.864	0.67	9.29852e-174
HNRNPK	6.33966e-178	0.505582	0.648	0.268	1.08687e-173
ATP1B3	7.12327e-178	0.42045	0.382	0.051	1.22121e-173
CCT3	1.27507e-177	0.535741	0.494	0.125	2.18599e-173
GTF2A2	2.60527e-177	0.52935	0.494	0.126	4.46648e-173
NSA2	7.98736e-177	0.518358	0.523	0.146	1.36935e-172
SSR4	8.88941e-177	0.524839	0.715	0.362	1.524e-172
EEF2	2.51007e-176	0.622969	0.769	0.454	4.30327e-172
MYEOV2	2.6423e-176	0.547927	0.584	0.203	4.52996e-172
RPS27	6.40002e-176	0.274618	0.999	1	1.09722e-171
PSMC5	9.22355e-176	0.473819	0.49	0.122	1.58129e-171
LSM5	4.02512e-175	0.549032	0.535	0.161	6.90066e-171
EIF3K	4.95503e-175	0.524116	0.707	0.356	8.4949e-171
CD7	7.2383e-175	0.506965	0.58	0.194	1.24093e-170
UBE2S	8.68363e-175	0.420189	0.36	0.041	1.48872e-170
HNRNPU	2.42316e-174	0.515939	0.543	0.169	4.15427e-170
ISG15	8.95126e-174	0.623035	0.698	0.315	1.5346e-169
NDUFB6	1.38692e-173	0.39914	0.449	0.091	2.37774e-169
DAD1	1.49271e-173	0.568794	0.617	0.247	2.5591e-169
NOP56	1.57799e-173	0.56728	0.474	0.114	2.7053e-169
MRPS18C	2.24102e-173	0.496527	0.48	0.118	3.84201e-169
LSM2	4.92978e-173	0.469659	0.437	0.087	8.45162e-169
MTHFD2	5.40034e-173	0.430529	0.424	0.078	9.25834e-169
CDC42	1.14037e-172	0.501008	0.594	0.214	1.95505e-168
STIP1	2.61873e-172	0.433811	0.418	0.074	4.48955e-168
TMA16	5.44645e-172	0.437599	0.37	0.049	9.33739e-168
MT-ND4L	1.30801e-171	0.508919	0.698	0.342	2.24245e-167
HMGN2	2.54124e-171	0.500637	0.668	0.302	4.35671e-167
MRPL33	5.1403e-171	0.496897	0.525	0.153	8.81254e-167
IMPDH2	9.61191e-171	0.485759	0.435	0.088	1.64787e-166
COX20	1.11993e-170	0.422279	0.41	0.071	1.92e-166
TARS	1.16944e-170	0.354612	0.365	0.046	2.00488e-166
UQCR10	1.39531e-170	0.575106	0.66	0.305	2.39211e-166
ARF6	1.56959e-170	0.448987	0.501	0.132	2.69091e-166
NAA10	1.73427e-170	0.479461	0.415	0.077	2.97324e-166
PRDX4	2.76033e-170	0.408198	0.37	0.05	4.7323e-166
NMT1	5.16943e-170	0.498603	0.545	0.172	8.86246e-166
HLA-E	8.14009e-170	0.495278	0.851	0.607	1.39554e-165
SRRM1	1.09908e-169	0.491835	0.591	0.215	1.88426e-165
ATP5EP2	1.10481e-169	0.456125	0.58	0.2	1.89408e-165
COX4I1	1.95372e-169	0.481638	0.88	0.698	3.34946e-165
ATP6V0B	2.12127e-169	0.531629	0.497	0.133	3.63671e-165
COX16	2.68383e-169	0.458983	0.476	0.118	4.60116e-165
CDV3	4.1408e-169	0.447304	0.43	0.085	7.09898e-165
CTLA4	5.28113e-169	0.438853	0.287	0.013	9.05397e-165
C11orf31	6.19646e-169	0.489214	0.544	0.171	1.06232e-164
C11orf58	8.2036e-169	0.512366	0.607	0.232	1.40642e-164
HSPB1	9.85911e-169	0.407315	0.421	0.079	1.69025e-164
TMED9	2.65716e-168	0.440129	0.484	0.121	4.55543e-164
HNRNPD	2.82135e-168	0.511657	0.521	0.153	4.83693e-164
RHOA	3.18184e-168	0.459666	0.559	0.184	5.45495e-164
RBPJ	3.24147e-168	0.539168	0.417	0.079	5.55718e-164
NDUFB9	4.03942e-168	0.522518	0.64	0.272	6.92518e-164
UQCC2	7.6062e-168	0.413326	0.393	0.064	1.30401e-163
RPL36AL	8.33217e-168	0.601377	0.88	0.716	1.42847e-163
UQCRFS1	1.03463e-167	0.439953	0.487	0.124	1.77378e-163
MRPL13	2.76915e-167	0.375343	0.37	0.051	4.74743e-163
PPDPF	3.40491e-167	0.500713	0.73	0.415	5.83738e-163
HYPK	4.30888e-167	0.374305	0.351	0.042	7.38715e-163
TCP1	4.38286e-167	0.46877	0.455	0.105	7.51397e-163
TOP1	5.87881e-167	0.387249	0.371	0.053	1.00786e-162
ST13	8.31563e-167	0.4701	0.558	0.187	1.42563e-162
SF3B5	1.48384e-166	0.536126	0.557	0.192	2.5439e-162
HSD17B10	1.69247e-166	0.425903	0.436	0.091	2.90158e-162
RPL30	1.74415e-166	0.426616	0.974	0.982	2.99017e-162
SSB	1.76464e-166	0.451147	0.49	0.129	3.0253e-162
POLR2F	2.11092e-166	0.481426	0.464	0.113	3.61896e-162
ATP5C1	2.11737e-166	0.446966	0.497	0.136	3.63003e-162
H3F3A	2.29702e-166	0.555921	0.758	0.444	3.93801e-162
JTB	6.19332e-166	0.57702	0.56	0.196	1.06178e-161
CCDC85B	1.04874e-165	0.530299	0.509	0.146	1.79795e-161
EIF2S1	1.21454e-165	0.419743	0.388	0.063	2.08221e-161
UBC	1.69744e-165	0.530957	0.715	0.371	2.91009e-161
H2AFZ	1.97061e-165	0.668589	0.629	0.274	3.37842e-161
RAC1	4.38034e-165	0.476704	0.516	0.153	7.50966e-161
NOP58	5.79291e-165	0.44324	0.471	0.115	9.93137e-161
FKBP2	7.42595e-165	0.443948	0.482	0.124	1.27311e-160
KRTCAP2	1.07402e-163	0.494618	0.645	0.288	1.84129e-159
PFDN6	1.69321e-163	0.429827	0.415	0.08	2.90283e-159
GPATCH4	2.86345e-163	0.45409	0.381	0.061	4.90909e-159
AHSA1	4.25273e-163	0.367855	0.367	0.052	7.29089e-159
TXNL4A	5.64067e-163	0.433168	0.46	0.109	9.67037e-159
PSMC4	6.00446e-163	0.425669	0.408	0.077	1.0294e-158
PSMD11	9.10519e-163	0.395686	0.386	0.064	1.56099e-158
C17orf89	1.01976e-162	0.484636	0.444	0.101	1.74828e-158
RRP7A	6.60569e-162	0.410234	0.391	0.067	1.13248e-157
ACTR3	7.31445e-162	0.397663	0.455	0.106	1.25399e-157
DESI1	8.25246e-162	0.337694	0.307	0.025	1.4148e-157
TMEM208	9.22168e-162	0.408282	0.396	0.071	1.58097e-157
MDH2	1.20483e-161	0.440281	0.472	0.121	2.06556e-157
PSMA6	1.71294e-161	0.400681	0.403	0.074	2.93666e-157
FBL	1.72052e-161	0.490895	0.551	0.188	2.94966e-157
ATP5O	2.9614e-161	0.447531	0.619	0.253	5.07703e-157
OSTC	3.2627e-161	0.418732	0.451	0.104	5.59358e-157
TUBA1C	7.30106e-161	0.355239	0.338	0.039	1.25169e-156
RPL34	8.39358e-161	0.326688	0.994	0.999	1.439e-156
PRDX2	1.6022e-160	0.480415	0.555	0.192	2.74681e-156
NDUFS7	5.52993e-160	0.395612	0.465	0.115	9.48051e-156
VDAC3	6.33705e-160	0.3618	0.368	0.055	1.08642e-155
CHCHD10	1.13497e-159	0.452949	0.424	0.089	1.94579e-155
DKC1	2.11663e-159	0.457146	0.403	0.077	3.62875e-155
SPCS1	2.36897e-159	0.531263	0.612	0.256	4.06136e-155
RPL26L1	3.37971e-159	0.39518	0.363	0.054	5.79418e-155
VDAC2	4.72943e-159	0.460287	0.443	0.103	8.10814e-155
CALM1	7.64762e-159	0.596764	0.74	0.437	1.31111e-154
MRPS7	1.12401e-158	0.405503	0.406	0.078	1.927e-154
MRPS34	1.82275e-158	0.466992	0.457	0.114	3.12492e-154
ATP5G2	3.63095e-158	0.514264	0.789	0.504	6.22491e-154
TAF9	5.17127e-158	0.44174	0.446	0.105	8.86563e-154
POLR2K	8.50245e-158	0.384924	0.394	0.071	1.45766e-153
TALDO1	1.09573e-157	0.459178	0.491	0.14	1.87851e-153
EMG1	1.73653e-157	0.388288	0.372	0.059	2.97711e-153
CHMP2A	1.89244e-157	0.398967	0.455	0.112	3.2444e-153
POLR2I	2.69045e-157	0.493615	0.511	0.159	4.6125e-153
YWHAQ	1.00242e-156	0.433554	0.439	0.102	1.71854e-152
TMBIM6	2.44675e-156	0.452506	0.578	0.22	4.19472e-152
NDUFA2	1.99575e-155	0.418822	0.492	0.141	3.42151e-151
NIFK	2.26957e-155	0.429952	0.402	0.08	3.89095e-151
MT-CO3	3.80405e-155	0.495121	0.981	0.949	6.52167e-151
RSL1D1	5.99281e-155	0.509806	0.554	0.201	1.02741e-150
MRPL47	6.73577e-155	0.353851	0.356	0.053	1.15478e-150
RBM17	8.43027e-155	0.442731	0.405	0.082	1.44529e-150
IFITM2	1.8443e-154	0.474196	0.631	0.276	3.16187e-150
MRPS15	2.34738e-154	0.381783	0.375	0.064	4.02435e-150
MRPL3	3.33912e-154	0.40191	0.381	0.067	5.72459e-150
BAX	9.45979e-154	0.419206	0.465	0.122	1.62179e-149
STOML2	1.15033e-153	0.429221	0.395	0.077	1.97212e-149
MRPL18	1.58646e-153	0.384675	0.377	0.065	2.71983e-149
GSTO1	3.10061e-153	0.43058	0.472	0.128	5.31568e-149
MRP63	4.2923e-153	0.498131	0.513	0.166	7.35872e-149
BOLA2B	7.03218e-153	0.34839	0.333	0.043	1.2056e-148
PIM3	1.09352e-152	0.432972	0.373	0.064	1.87473e-148
C9orf16	2.78324e-152	0.443784	0.551	0.194	4.77158e-148
PPP1CA	3.78758e-152	0.462107	0.551	0.197	6.49343e-148
MRPS21	4.44928e-152	0.466671	0.561	0.204	7.62785e-148
C8orf33	1.14967e-151	0.442117	0.402	0.083	1.971e-147
PCBP1	3.69099e-151	0.475997	0.621	0.272	6.32784e-147
AP2B1	3.98893e-151	0.369129	0.476	0.13	6.83863e-147
DUSP2	1.4709e-150	0.43967	0.357	0.057	2.5217e-146
ZC3H15	1.69646e-150	0.433508	0.466	0.127	2.9084e-146
CKS2	2.5879e-150	0.384096	0.329	0.043	4.4367e-146
GHITM	3.28304e-150	0.390515	0.45	0.115	5.62845e-146
RPS19BP1	3.43322e-150	0.480375	0.443	0.114	5.88591e-146
MIR4435-1HG	3.82262e-150	0.37806	0.304	0.031	6.55351e-146
TAGLN2	4.38958e-150	0.445847	0.534	0.185	7.52549e-146
NAA20	4.6645e-150	0.39584	0.401	0.084	7.99682e-146
SUPT16H	5.05002e-150	0.435384	0.404	0.086	8.65775e-146
SH3BGRL3	5.24329e-150	0.554944	0.789	0.545	8.98909e-146
BUD31	8.49847e-150	0.398764	0.411	0.09	1.45698e-145
PWP1	1.00634e-149	0.391852	0.388	0.075	1.72527e-145
SNRPC	1.15765e-149	0.433124	0.448	0.116	1.98467e-145
ATP5F1	1.42348e-149	0.40297	0.462	0.123	2.44041e-145
SFPQ	1.66182e-149	0.367502	0.41	0.087	2.84903e-145
MRPL32	1.7304e-149	0.387561	0.406	0.086	2.9666e-145
PHB2	1.78829e-149	0.431628	0.429	0.102	3.06585e-145
CCDC124	3.43806e-149	0.382306	0.364	0.062	5.8942e-145
PSMD4	5.48254e-149	0.40298	0.456	0.12	9.39926e-145
SNF8	6.25099e-149	0.357447	0.379	0.07	1.07167e-144
TRAPPC1	6.41054e-149	0.398127	0.506	0.158	1.09902e-144
SON	7.2503e-149	0.432389	0.748	0.443	1.24299e-144
MRPL4	7.48448e-149	0.376851	0.343	0.05	1.28314e-144
LDHB	1.40123e-148	0.62545	0.802	0.576	2.40226e-144
C14orf166	1.51388e-148	0.447273	0.505	0.159	2.59539e-144
PNO1	2.34923e-148	0.328658	0.304	0.031	4.02752e-144
HSPA9	2.97478e-148	0.387433	0.393	0.079	5.09997e-144
HSBP1	5.2284e-148	0.389608	0.385	0.075	8.96357e-144
MAGOHB	1.0385e-147	0.340613	0.337	0.048	1.7804e-143
FRMD4B	2.00973e-147	0.294713	0.273	0.019	3.44548e-143
MRPS23	2.81599e-147	0.375025	0.37	0.067	4.82774e-143
SELT	3.00141e-147	0.361206	0.404	0.085	5.14562e-143
DDX5	4.14588e-147	0.441018	0.766	0.477	7.1077e-143
IMP4	6.62576e-147	0.409999	0.389	0.078	1.13592e-142
UBE2I	7.4856e-147	0.415547	0.5	0.154	1.28333e-142
MZT2B	8.26785e-147	0.50214	0.634	0.304	1.41744e-142
PET100	9.05219e-147	0.439259	0.631	0.287	1.55191e-142
MRPL1	1.06127e-146	0.388173	0.342	0.052	1.81945e-142
NDUFA9	3.25855e-146	0.329486	0.352	0.056	5.58646e-142
KTN1	3.42466e-146	0.424544	0.543	0.194	5.87123e-142
NAP1L1	6.86448e-146	0.535602	0.67	0.352	1.17685e-141
NDUFA12	9.34604e-146	0.437994	0.52	0.178	1.60229e-141
XRCC6	1.78004e-145	0.414459	0.502	0.158	3.0517e-141
ARHGDIA	1.96012e-145	0.404994	0.477	0.138	3.36044e-141
UBE2L6	3.00129e-144	0.368077	0.462	0.127	5.14542e-140
RGS10	4.50717e-144	0.414092	0.544	0.2	7.72709e-140
TMEM126A	9.68496e-144	0.336492	0.333	0.049	1.66039e-139
PSMD13	1.49102e-143	0.376703	0.396	0.085	2.55621e-139
BRIX1	1.70711e-143	0.396081	0.37	0.069	2.92666e-139
RPS17	3.08635e-143	0.455546	0.535	0.196	5.29124e-139
ANP32B	3.14369e-143	0.501152	0.545	0.208	5.38953e-139
C19orf43	3.3859e-143	0.474045	0.571	0.231	5.80478e-139
AP2S1	6.76383e-143	0.379193	0.44	0.115	1.15959e-138
CCT7	6.99775e-143	0.453398	0.424	0.107	1.19969e-138
COPE	9.86683e-143	0.421231	0.551	0.204	1.69157e-138
EIF5	1.87671e-142	0.449402	0.464	0.134	3.21743e-138
PSMD6	1.89772e-142	0.34939	0.367	0.068	3.25346e-138
MRTO4	4.90079e-142	0.400772	0.351	0.061	8.40191e-138
STRA13	5.35097e-142	0.400231	0.359	0.065	9.1737e-138
C19orf24	5.56552e-142	0.382407	0.41	0.096	9.54153e-138
PDCD11	6.67021e-142	0.339138	0.31	0.039	1.14354e-137
PCNA	8.1566e-142	0.443538	0.36	0.067	1.39837e-137
YIF1A	9.58655e-142	0.32565	0.345	0.056	1.64352e-137
ORMDL2	1.61412e-141	0.308998	0.354	0.06	2.76725e-137
VCP	2.32861e-141	0.400673	0.414	0.101	3.99218e-137
UTP11L	2.5712e-141	0.337812	0.318	0.043	4.40806e-137
MRPL11	3.51076e-141	0.369413	0.376	0.075	6.01885e-137
CLTA	4.19612e-141	0.42268	0.428	0.11	7.19382e-137
CD320	4.95257e-141	0.384921	0.34	0.055	8.49069e-137
LRRFIP1	1.24573e-140	0.353642	0.494	0.151	2.13568e-136
RBM39	1.64291e-140	0.434688	0.601	0.262	2.81661e-136
C16orf13	1.66517e-140	0.391011	0.429	0.11	2.85476e-136
POLR2E	1.77975e-140	0.374588	0.395	0.088	3.0512e-136
C8orf59	1.86989e-140	0.434982	0.491	0.159	3.20574e-136
IFI35	1.88363e-140	0.328107	0.377	0.075	3.2293e-136
ATP5A1	3.06081e-140	0.429026	0.54	0.202	5.24745e-136
TMCO1	3.34392e-140	0.389838	0.429	0.11	5.73282e-136
LAP3	3.34476e-140	0.330344	0.364	0.067	5.73426e-136
TOMM40	8.27424e-140	0.409929	0.355	0.065	1.41854e-135
SSNA1	1.25975e-139	0.387698	0.415	0.101	2.15972e-135
CDK4	1.56527e-139	0.399002	0.354	0.065	2.6835e-135
REEP5	1.74459e-139	0.349547	0.383	0.08	2.99093e-135
PSMB4	2.56001e-139	0.341474	0.379	0.077	4.38888e-135
NDUFB1	2.58204e-139	0.448077	0.609	0.276	4.42665e-135
DNAJC15	2.77095e-139	0.323451	0.351	0.061	4.75052e-135
LSM4	2.90401e-139	0.407124	0.416	0.103	4.97864e-135
EMC6	3.00331e-139	0.389373	0.361	0.068	5.14887e-135
SPCS2	4.08247e-139	0.420514	0.545	0.204	6.99898e-135
TNFAIP8	6.82938e-139	0.390556	0.406	0.095	1.17083e-134
RNASEH2C	2.91733e-138	0.341791	0.37	0.073	5.00147e-134
MRPL22	3.41298e-138	0.363187	0.351	0.063	5.85121e-134
MRPL17	5.1864e-138	0.36274	0.32	0.047	8.89156e-134
TMEM147	5.36114e-138	0.386307	0.421	0.107	9.19113e-134
TRAPPC2L	7.6179e-138	0.379311	0.426	0.109	1.30601e-133
TIMM17A	7.79777e-138	0.383934	0.361	0.069	1.33685e-133
MTDH	2.17741e-137	0.467377	0.467	0.145	3.73296e-133
NARS	2.48723e-137	0.347746	0.37	0.073	4.26411e-133
EEF1G	2.95472e-137	0.434274	0.615	0.28	5.06557e-133
RP11-138A9.2	3.53939e-137	0.391649	0.364	0.071	6.06792e-133
TMSB4X	5.36606e-137	0.385633	0.997	1	9.19958e-133
PMF1	1.98985e-136	0.313522	0.358	0.067	3.4114e-132
SYNCRIP	3.10173e-136	0.363941	0.368	0.075	5.3176e-132
MYL12A	4.16456e-136	0.442284	0.776	0.528	7.13971e-132
MRPS36	4.44382e-136	0.337985	0.37	0.075	7.61849e-132
RRP15	8.62776e-136	0.328945	0.315	0.045	1.47914e-131
PARP1	9.61456e-136	0.395183	0.41	0.103	1.64832e-131
SPCS3	1.22522e-135	0.328352	0.341	0.059	2.10052e-131
EIF3M	1.68449e-135	0.436334	0.526	0.195	2.88788e-131
NDUFS8	2.59235e-135	0.380396	0.445	0.128	4.44433e-131
NOLC1	2.75155e-135	0.375042	0.375	0.08	4.71726e-131
PRDX5	3.92431e-135	0.366039	0.497	0.164	6.72784e-131
RNF145	4.55397e-135	0.367135	0.401	0.095	7.80732e-131
GZMB	6.66046e-135	1.34223	0.778	0.531	1.14187e-130
CITE-CD45RA-TCAATCCTTCCGCTT	7.17628e-135	0.566333	0.999	1	1.2303e-130
CISD1	7.38035e-135	0.354155	0.321	0.049	1.26529e-130
GADD45B	8.29402e-135	0.401767	0.383	0.084	1.42193e-130
MRPL21	9.46877e-135	0.348467	0.341	0.06	1.62333e-130
CREM	9.8261e-135	0.395533	0.412	0.103	1.68459e-130
METTL5	1.71036e-134	0.366288	0.362	0.072	2.93225e-130
CDK2AP2	1.92577e-134	0.346572	0.418	0.105	3.30153e-130
PPM1G	2.77903e-134	0.389409	0.364	0.073	4.76436e-130
SS18L2	3.25726e-134	0.39968	0.445	0.13	5.58425e-130
MRPL27	3.87123e-134	0.322412	0.331	0.054	6.63684e-130
SRPK1	1.28454e-133	0.321039	0.325	0.051	2.20222e-129
PAK1IP1	1.56292e-133	0.290631	0.292	0.035	2.67947e-129
DNAJC8	1.6082e-133	0.372656	0.464	0.141	2.7571e-129
FUOM	1.70903e-133	0.261586	0.277	0.028	2.92996e-129
LAGE3	3.05536e-133	0.363015	0.381	0.085	5.23812e-129
TMEM50A	4.44528e-133	0.347065	0.445	0.125	7.62099e-129
RNF213	6.40481e-133	0.42917	0.626	0.289	1.09804e-128
APEX1	6.42848e-133	0.375024	0.418	0.109	1.1021e-128
PRDM1	9.79147e-133	0.306527	0.3	0.04	1.67865e-128
PAM16	1.60167e-132	0.315862	0.278	0.03	2.74591e-128
PSMC2	1.71096e-132	0.331592	0.354	0.068	2.93326e-128
CISD3	3.02161e-132	0.367679	0.352	0.068	5.18026e-128
ACP1	4.49748e-132	0.37834	0.396	0.095	7.71047e-128
LINC00116	1.49827e-131	0.376527	0.396	0.097	2.56863e-127
RPF2	1.80063e-131	0.30436	0.308	0.044	3.08701e-127
MRPL28	5.12087e-131	0.302196	0.325	0.053	8.77921e-127
TSPO	5.75431e-131	0.387718	0.476	0.153	9.86519e-127
2020-09-07	8.33923e-131	0.384198	0.527	0.196	1.42968e-126
CNPY2	1.47619e-130	0.385297	0.406	0.103	2.53078e-126
TTC1	5.70696e-130	0.354908	0.395	0.096	9.78401e-126
VPS29	6.14564e-130	0.356201	0.422	0.114	1.05361e-125
CAP1	6.73722e-130	0.345348	0.414	0.107	1.15503e-125
CLPP	7.77641e-130	0.331077	0.345	0.066	1.33319e-125
TAPBP	1.04552e-129	0.341151	0.466	0.143	1.79244e-125
HMGB1	1.09849e-129	0.596249	0.75	0.528	1.88325e-125
ATPIF1	2.29201e-129	0.429952	0.54	0.218	3.92943e-125
KIAA0020	2.46081e-129	0.347083	0.323	0.054	4.21881e-125
TMEM167A	5.18047e-129	0.319508	0.319	0.052	8.88139e-125
FAM207A	5.98338e-129	0.307006	0.29	0.038	1.02579e-124
MITD1	9.52603e-129	0.346352	0.395	0.097	1.63314e-124
CCND3	1.2158e-128	0.353105	0.416	0.111	2.08437e-124
POLR2J	1.58181e-128	0.370198	0.408	0.108	2.71186e-124
RAD23A	1.69263e-128	0.386119	0.398	0.1	2.90184e-124
NASP	1.82894e-128	0.355421	0.337	0.063	3.13554e-124
GGCT	1.92978e-128	0.322527	0.298	0.042	3.30841e-124
BRK1	2.11731e-128	0.426167	0.532	0.213	3.62992e-124
CBX6	2.2354e-128	0.341407	0.348	0.068	3.83237e-124
ARID5B	4.86763e-128	0.383242	0.475	0.156	8.34506e-124
NDFIP2	8.09133e-128	0.266514	0.266	0.027	1.38718e-123
WDR83OS	1.33977e-127	0.375351	0.493	0.172	2.29691e-123
ID2	1.55214e-127	0.483018	0.353	0.074	2.66098e-123
DNAJC2	2.0686e-127	0.317556	0.327	0.057	3.54641e-123
IL2RG	3.38822e-127	0.365434	0.565	0.233	5.80877e-123
RER1	3.82575e-127	0.358536	0.385	0.093	6.55886e-123
CD69	5.67141e-127	0.373718	0.286	0.037	9.72307e-123
GAR1	8.5891e-127	0.288096	0.275	0.032	1.47252e-122
NDUFB10	1.75874e-126	0.422955	0.478	0.165	3.01518e-122
KDELR2	2.1757e-126	0.317028	0.334	0.062	3.73002e-122
PSMD1	2.23305e-126	0.306014	0.322	0.055	3.82834e-122
IRF4	2.32008e-126	0.330802	0.376	0.087	3.97755e-122
GBP1	4.32235e-126	0.322409	0.36	0.076	7.41024e-122
SUPT4H1	5.01989e-126	0.375326	0.41	0.112	8.6061e-122
ARPC4	5.13005e-126	0.32651	0.382	0.091	8.79496e-122
YWHAZ	6.39317e-126	0.420444	0.595	0.281	1.09605e-121
GSPT1	6.39435e-126	0.342226	0.363	0.08	1.09625e-121
CNBP	7.4095e-126	0.488456	0.661	0.368	1.27029e-121
YRDC	1.07515e-125	0.29557	0.269	0.03	1.84324e-121
NUDT5	1.23216e-125	0.330524	0.338	0.066	2.11242e-121
ATP5H	1.57454e-125	0.367391	0.535	0.21	2.6994e-121
DNAJB11	2.35536e-125	0.317956	0.357	0.075	4.03802e-121
BSG	2.81338e-125	0.342584	0.411	0.112	4.82325e-121
EIF3G	2.96405e-125	0.403249	0.548	0.221	5.08157e-121
IFI16	3.41189e-125	0.370003	0.527	0.199	5.84935e-121
LSM1	6.60361e-125	0.325145	0.35	0.073	1.13212e-120
FRG1	1.29147e-124	0.3804	0.439	0.134	2.2141e-120
MRPL50	1.5582e-124	0.264674	0.286	0.038	2.67138e-120
AIMP1	1.85053e-124	0.368733	0.382	0.093	3.17255e-120
TXNL1	2.0645e-124	0.338207	0.347	0.072	3.53938e-120
FIS1	2.17975e-124	0.333487	0.404	0.107	3.73697e-120
ITGB1BP1	2.34227e-124	0.318724	0.337	0.065	4.01559e-120
KARS	2.73919e-124	0.31296	0.362	0.079	4.69607e-120
THOC7	3.35268e-124	0.358296	0.4	0.105	5.74784e-120
CISD2	3.79116e-124	0.288549	0.31	0.051	6.49956e-120
GLRX3	4.20022e-124	0.331489	0.331	0.063	7.20086e-120
EIF4A3	8.86833e-124	0.306745	0.343	0.069	1.52039e-119
POP7	9.04852e-124	0.288865	0.29	0.041	1.55128e-119
CWC15	9.12036e-124	0.342382	0.378	0.091	1.5636e-119
PEBP1	9.5512e-124	0.427545	0.502	0.19	1.63746e-119
CDC37	1.49545e-123	0.37963	0.397	0.104	2.5638e-119
SYNGR2	2.26802e-123	0.343094	0.43	0.126	3.88829e-119
BAZ1A	2.38451e-123	0.334661	0.42	0.119	4.088e-119
PIM2	2.53277e-123	0.406627	0.437	0.133	4.34218e-119
CITE-CD28-ATTCTGTCTTTCCCA	3.20157e-123	0.333031	1	1	5.48878e-119
HNRNPA0	3.27895e-123	0.356406	0.439	0.133	5.62144e-119
SURF4	5.28729e-123	0.311447	0.318	0.056	9.06452e-119
POLR2G	1.15696e-122	0.345612	0.389	0.1	1.9835e-118
ANP32E	1.33474e-122	0.358297	0.374	0.09	2.28829e-118
EED	1.40145e-122	0.400267	0.308	0.053	2.40265e-118
MRPL36	1.55729e-122	0.317944	0.318	0.057	2.66983e-118
CDC123	1.8308e-122	0.363354	0.362	0.083	3.13872e-118
ODC1	2.14203e-122	0.308565	0.275	0.035	3.6723e-118
ATP6V1F	2.21985e-122	0.372752	0.451	0.145	3.80571e-118
SMS	4.04406e-122	0.31072	0.272	0.034	6.93314e-118
GTPBP4	4.16734e-122	0.336488	0.321	0.059	7.14449e-118
SF3B2	4.43813e-122	0.357315	0.425	0.126	7.60872e-118
DYNLT1	8.0979e-122	0.336063	0.361	0.082	1.3883e-117
NDUFS3	9.14538e-122	0.316768	0.353	0.077	1.56788e-117
MDH1	1.7569e-121	0.319976	0.374	0.089	3.01203e-117
SDHB	1.9212e-121	0.342515	0.352	0.078	3.2937e-117
CCDC167	1.99052e-121	0.347341	0.353	0.078	3.41254e-117
NDUFC1	2.11694e-121	0.376311	0.471	0.163	3.62927e-117
GTF3A	2.75621e-121	0.448504	0.539	0.232	4.72524e-117
MRPS16	3.16039e-121	0.326963	0.348	0.074	5.41818e-117
MRPL55	3.75035e-121	0.342902	0.354	0.079	6.42959e-117
SNHG15	4.09763e-121	0.294937	0.3	0.048	7.02498e-117
PCBP2	6.92733e-121	0.41691	0.583	0.275	1.18762e-116
FAM136A	9.50107e-121	0.32438	0.312	0.055	1.62886e-116
UXT	9.60634e-121	0.381782	0.572	0.254	1.64691e-116
MRPS24	9.7452e-121	0.332218	0.36	0.083	1.67072e-116
GPX4	1.031e-120	0.432662	0.588	0.282	1.76755e-116
SARS	2.14128e-120	0.31835	0.39	0.1	3.67101e-116
PPP4C	2.80629e-120	0.32213	0.392	0.103	4.8111e-116
PRRC2C	2.97702e-120	0.379674	0.497	0.184	5.1038e-116
HSPB11	4.03229e-120	0.30546	0.333	0.067	6.91295e-116
C17orf49	4.1248e-120	0.255689	0.281	0.038	7.07155e-116
POLR3K	1.00896e-119	0.363156	0.328	0.065	1.72976e-115
WBSCR22	1.04337e-119	0.322132	0.357	0.081	1.78875e-115
ARF1	1.14496e-119	0.402578	0.468	0.163	1.96292e-115
PRR13	1.71967e-119	0.373242	0.509	0.194	2.94821e-115
SRP9	1.85264e-119	0.347875	0.441	0.138	3.17617e-115
DPM2	3.86431e-119	0.291882	0.278	0.038	6.62498e-115
MTCH2	5.66944e-119	0.271129	0.272	0.036	9.71969e-115
COA4	6.92238e-119	0.290525	0.301	0.05	1.18677e-114
UBE2D2	7.23293e-119	0.388374	0.475	0.17	1.24001e-114
EIF4G2	7.48158e-119	0.344706	0.387	0.102	1.28264e-114
UBE2M	2.1593e-118	0.256431	0.249	0.026	3.7019e-114
PPP1CC	2.38922e-118	0.293356	0.34	0.071	4.09608e-114
SH2D2A	2.44871e-118	0.320014	0.32	0.061	4.19807e-114
LAMTOR2	3.37614e-118	0.31337	0.374	0.093	5.78805e-114
ENSA	3.47036e-118	0.335312	0.401	0.111	5.94959e-114
GPX1	5.20075e-118	0.397887	0.455	0.154	8.91616e-114
NDFIP1	6.15057e-118	0.314121	0.371	0.091	1.05445e-113
TPRKB	1.41211e-117	0.310013	0.335	0.07	2.42092e-113
NCBP2	1.71013e-117	0.316696	0.338	0.072	2.93185e-113
PRDX3	1.96586e-117	0.319793	0.365	0.088	3.37027e-113
ILF3	2.25508e-117	0.328196	0.377	0.096	3.86612e-113
NDUFAF4	2.55346e-117	0.28172	0.307	0.054	4.37764e-113
SIVA1	4.87037e-117	0.382289	0.427	0.134	8.34976e-113
SRP19	4.95849e-117	0.279427	0.337	0.071	8.50084e-113
UFD1L	6.11263e-117	0.303189	0.325	0.065	1.04795e-112
SUMO1	6.14198e-117	0.33256	0.408	0.117	1.05298e-112
PSMD9	6.2744e-117	0.282379	0.311	0.056	1.07568e-112
TNIP2	6.74946e-117	0.255343	0.277	0.039	1.15713e-112
VIMP	8.78083e-117	0.33791	0.368	0.09	1.50539e-112
NT5C	9.48209e-117	0.29313	0.29	0.046	1.62561e-112
CIB1	1.06104e-116	0.419999	0.528	0.224	1.81904e-112
RNF19A	1.06996e-116	0.287572	0.309	0.056	1.83434e-112
TBCB	1.28949e-116	0.305151	0.406	0.113	2.2107e-112
PFDN5	1.44634e-116	0.336616	0.92	0.843	2.4796e-112
KPNB1	1.75368e-116	0.378656	0.373	0.096	3.0065e-112
TRAPPC4	2.04499e-116	0.351278	0.364	0.09	3.50593e-112
GMFG	2.35191e-116	0.355166	0.715	0.422	4.03211e-112
CLTB	3.00495e-116	0.279929	0.327	0.066	5.15169e-112
TIMM44	3.35823e-116	0.265009	0.284	0.043	5.75736e-112
HDDC2	3.89014e-116	0.318171	0.354	0.083	6.66925e-112
CSTB	1.63153e-115	0.376787	0.557	0.255	2.7971e-111
PFDN4	2.07242e-115	0.330023	0.372	0.094	3.55295e-111
SSRP1	3.11303e-115	0.298101	0.304	0.055	5.33698e-111
NFKB1	3.47179e-115	0.262251	0.263	0.034	5.95204e-111
LAMTOR1	3.52493e-115	0.326456	0.382	0.103	6.04314e-111
SEC11A	7.26959e-115	0.310609	0.386	0.103	1.2463e-110
ARID5A	7.52569e-115	0.308164	0.359	0.085	1.2902e-110
SRRM2	8.91644e-115	0.385835	0.57	0.264	1.52864e-110
ANP32A	9.58147e-115	0.362621	0.399	0.116	1.64265e-110
FDPS	1.64002e-114	0.302718	0.345	0.078	2.81165e-110
PUF60	1.77344e-114	0.304851	0.353	0.083	3.04039e-110
U2SURP	2.66138e-114	0.326206	0.418	0.124	4.56266e-110
PSMD12	3.2814e-114	0.307403	0.314	0.061	5.62563e-110
BUB3	3.28392e-114	0.316403	0.369	0.093	5.62995e-110
PHF5A	4.04997e-114	0.303108	0.294	0.05	6.94326e-110
SFT2D1	4.10581e-114	0.293822	0.325	0.067	7.03901e-110
RUVBL2	4.25862e-114	0.250324	0.266	0.036	7.30098e-110
PTPN7	4.80783e-114	0.294475	0.316	0.062	8.24255e-110
SRA1	4.86481e-114	0.277635	0.298	0.052	8.34023e-110
EXOSC1	1.2004e-113	0.286592	0.321	0.065	2.05796e-109
UBBP4	1.5605e-113	0.261605	0.283	0.045	2.67532e-109
DTYMK	1.56561e-113	0.294828	0.275	0.041	2.68409e-109
DDX24	2.33798e-113	0.415757	0.597	0.306	4.00824e-109
THRAP3	2.66327e-113	0.329778	0.411	0.123	4.56591e-109
FIBP	3.02519e-113	0.269353	0.301	0.054	5.18639e-109
NUDT1	8.26059e-113	0.256936	0.284	0.046	1.41619e-108
HMGA1	1.06667e-112	0.372116	0.354	0.087	1.8287e-108
VAMP8	1.26859e-112	0.355169	0.512	0.211	2.17487e-108
POLE3	1.78929e-112	0.318389	0.315	0.063	3.06756e-108
RP11-345J4.5	2.57864e-112	0.272132	0.271	0.04	4.42082e-108
UFM1	3.29892e-112	0.278792	0.288	0.048	5.65567e-108
CKS1B	3.67701e-112	0.294544	0.273	0.042	6.30387e-108
SERP1	4.51852e-112	0.444667	0.548	0.255	7.74655e-108
ZMAT2	7.33997e-112	0.300093	0.358	0.089	1.25837e-107
CD47	7.86256e-112	0.335614	0.435	0.143	1.34796e-107
DNAJC19	9.80603e-112	0.299968	0.362	0.091	1.68115e-107
MTFP1	1.1554e-111	0.264883	0.261	0.036	1.98082e-107
UQCRB	1.4266e-111	0.394867	0.797	0.611	2.44576e-107
EIF3A	1.55263e-111	0.345017	0.381	0.106	2.66182e-107
AK2	1.90425e-111	0.297049	0.298	0.055	3.26464e-107
ARF5	2.38287e-111	0.290336	0.397	0.114	4.0852e-107
GBP4	3.08544e-111	0.277641	0.311	0.061	5.28969e-107
EMC7	3.13889e-111	0.277201	0.322	0.067	5.38131e-107
CCDC58	3.86119e-111	0.274048	0.24	0.026	6.61962e-107
AKR1A1	5.2712e-111	0.250685	0.294	0.052	9.03694e-107
RARS	1.75975e-110	0.28635	0.277	0.044	3.01692e-106
CHMP4B	2.07755e-110	0.289519	0.335	0.075	3.56175e-106
NXT1	2.688e-110	0.257814	0.294	0.053	4.6083e-106
TUBA4A	3.5147e-110	0.300829	0.324	0.07	6.0256e-106
EXOSC3	3.53479e-110	0.262686	0.257	0.035	6.06004e-106
ARPC5	6.19576e-110	0.319973	0.437	0.146	1.0622e-105
IFITM1	6.95908e-110	0.382589	0.85	0.638	1.19306e-105
PLP2	7.08532e-110	0.366604	0.433	0.146	1.21471e-105
LCP1	1.69669e-109	0.333697	0.435	0.145	2.90881e-105
PTPN6	2.03725e-109	0.252199	0.323	0.068	3.49267e-105
DSTN	2.18142e-109	0.363215	0.43	0.144	3.73983e-105
ANAPC16	4.84164e-109	0.337289	0.485	0.187	8.30051e-105
MORF4L1	6.88324e-109	0.378499	0.548	0.254	1.18006e-104
ESF1	1.1696e-108	0.285031	0.33	0.074	2.00516e-104
LMAN2	1.27239e-108	0.307063	0.365	0.097	2.18138e-104
MRPL15	1.39933e-108	0.278623	0.279	0.047	2.39902e-104
BCCIP	1.56003e-108	0.28489	0.318	0.067	2.67451e-104
MRPL54	1.62559e-108	0.307458	0.379	0.105	2.78692e-104
RNPS1	2.00727e-108	0.322102	0.406	0.125	3.44127e-104
PSMD2	3.77709e-108	0.301815	0.319	0.069	6.47544e-104
SNRPA	4.05667e-108	0.255448	0.298	0.056	6.95476e-104
EXOSC4	5.27254e-108	0.262817	0.262	0.039	9.03925e-104
S100A11	7.54744e-108	0.479578	0.671	0.413	1.29393e-103
DPY30	1.07541e-107	0.302372	0.377	0.105	1.84369e-103
SNRNP40	1.10785e-107	0.265196	0.292	0.054	1.8993e-103
DCUN1D5	1.1157e-107	0.269279	0.255	0.036	1.91276e-103
PDCD2	1.12504e-107	0.294066	0.329	0.075	1.92877e-103
MCTS1	1.36158e-107	0.259521	0.281	0.048	2.3343e-103
C4orf32	1.43087e-107	0.273621	0.242	0.03	2.45308e-103
NDUFAF2	1.52944e-107	0.303783	0.304	0.061	2.62208e-103
FUS	1.84084e-107	0.340447	0.484	0.19	3.15594e-103
EEF1D	2.18536e-107	0.39053	0.879	0.741	3.74658e-103
SNRNP70	2.86414e-107	0.266755	0.304	0.06	4.91028e-103
CHMP5	3.32129e-107	0.274923	0.318	0.069	5.69402e-103
RPP30	3.5669e-107	0.267727	0.254	0.036	6.1151e-103
MX1	4.01577e-107	0.290246	0.341	0.082	6.88463e-103
EMC4	4.26495e-107	0.297633	0.348	0.087	7.31182e-103
VAPA	5.97606e-107	0.298923	0.377	0.105	1.02454e-102
RUNX3	6.57051e-107	0.253925	0.279	0.047	1.12645e-102
FKBP3	8.71716e-107	0.269902	0.308	0.063	1.49447e-102
PAICS	1.00708e-106	0.282974	0.291	0.054	1.72654e-102
POLD2	1.3467e-106	0.287519	0.277	0.047	2.30878e-102
MRPS26	1.35239e-106	0.30218	0.323	0.073	2.31854e-102
RSL24D1	1.50065e-106	0.37163	0.453	0.17	2.57271e-102
DNPH1	1.53416e-106	0.325798	0.415	0.134	2.63017e-102
CHMP4A	1.81142e-106	0.309082	0.428	0.142	3.1055e-102
TNIP3	2.31427e-106	0.274701	0.198	0.013	3.96758e-102
MT-CYB	2.44771e-106	0.351899	0.88	0.74	4.19636e-102
TFAM	3.498e-106	0.266102	0.258	0.038	5.99697e-102
TRA2B	3.51332e-106	0.350067	0.507	0.211	6.02323e-102
WDR1	3.89333e-106	0.288327	0.339	0.083	6.67472e-102
USP16	5.80841e-106	0.288079	0.335	0.079	9.95793e-102
RWDD1	6.24027e-106	0.339546	0.428	0.144	1.06983e-101
SRPRB	6.24929e-106	0.251519	0.267	0.042	1.07138e-101
CANX	6.75963e-106	0.274938	0.3	0.06	1.15887e-101
GNG8	8.65125e-106	0.278405	0.177	0.006	1.48317e-101
TMEM126B	1.36152e-105	0.253867	0.306	0.062	2.3342e-101
P4HB	1.59961e-105	0.302513	0.346	0.088	2.74237e-101
RNH1	1.67823e-105	0.281007	0.358	0.093	2.87715e-101
MCM7	2.23869e-105	0.29163	0.272	0.046	3.838e-101
SRP72	2.9393e-105	0.299737	0.298	0.06	5.03913e-101
MRPS6	3.04616e-105	0.315692	0.369	0.103	5.22233e-101
GMNN	3.10632e-105	0.253293	0.213	0.019	5.32547e-101
TDG	4.26659e-105	0.260092	0.272	0.046	7.31463e-101
TSTA3	5.01269e-105	0.263688	0.281	0.05	8.59375e-101
APOBEC3C	5.64698e-105	0.291894	0.306	0.064	9.68118e-101
TOMM20	6.06443e-105	0.317929	0.374	0.107	1.03969e-100
TNF	8.15438e-105	0.374201	0.298	0.061	1.39799e-100
DUT	1.03809e-104	0.489629	0.428	0.153	1.77971e-100
DPM1	1.13828e-104	0.269211	0.316	0.069	1.95146e-100
CHURC1	1.16468e-104	0.354554	0.524	0.229	1.99672e-100
GRB2	1.57522e-104	0.275381	0.331	0.078	2.70055e-100
HM13	2.49787e-104	0.273872	0.325	0.075	4.28234e-100
ELP5	4.77809e-104	0.254251	0.248	0.035	8.19157e-100
ADSL	6.34661e-104	0.279043	0.3	0.062	1.08806e-99
PTPN1	1.20458e-103	0.25101	0.303	0.062	2.06513e-99
COTL1	1.3946e-103	0.357186	0.455	0.169	2.39091e-99
TXN2	2.0002e-103	0.317515	0.321	0.075	3.42915e-99
COX7A2L	2.34451e-103	0.323313	0.418	0.141	4.01943e-99
MRPL24	3.17933e-103	0.262579	0.273	0.047	5.45065e-99
ANXA2	7.29358e-103	0.365618	0.409	0.136	1.25041e-98
SLC3A2	9.08931e-103	0.317805	0.353	0.095	1.55827e-98
LAG3	1.44224e-102	0.368406	0.26	0.043	2.47258e-98
FAM162A	1.86516e-102	0.310831	0.36	0.101	3.19763e-98
FKBP4	2.17035e-102	0.276045	0.256	0.04	3.72084e-98
H2AFY	2.43892e-102	0.287379	0.339	0.087	4.18128e-98
NUCKS1	2.98945e-102	0.329158	0.439	0.158	5.12511e-98
FAM177A1	3.91587e-102	0.259366	0.296	0.06	6.71338e-98
PSMC6	7.50849e-102	0.262954	0.285	0.055	1.28726e-97
DYNC1I2	8.29565e-102	0.275385	0.372	0.106	1.42221e-97
RAB7A	9.5812e-102	0.294978	0.36	0.101	1.6426e-97
RBM25	1.05282e-101	0.32307	0.428	0.149	1.80496e-97
RPL7L1	1.47596e-101	0.322446	0.327	0.08	2.53039e-97
MSN	1.98397e-101	0.307303	0.386	0.117	3.40132e-97
MRPL19	2.97062e-101	0.250946	0.258	0.041	5.09283e-97
PSMG2	3.72434e-101	0.27852	0.327	0.079	6.385e-97
PRDX6	3.81623e-101	0.272986	0.352	0.095	6.54254e-97
MAF	5.99742e-101	0.28989	0.259	0.043	1.0282e-96
PPAN	6.83545e-101	0.250911	0.242	0.034	1.17187e-96
LRRC59	8.24005e-101	0.255289	0.259	0.042	1.41267e-96
WDR74	1.69784e-100	0.281024	0.308	0.069	2.91078e-96
GDI2	2.15187e-100	0.293894	0.354	0.097	3.68917e-96
CEBPZ	2.4987e-100	0.299201	0.348	0.095	4.28378e-96
TRAPPC3	3.32565e-100	0.264955	0.299	0.064	5.70149e-96
MRPL16	4.01776e-100	0.250936	0.283	0.055	6.88805e-96
XRN2	4.16987e-100	0.281159	0.352	0.096	7.14883e-96
ITGAE	4.8855e-100	0.252997	0.267	0.047	8.37569e-96
CYBA	5.35787e-100	0.361698	0.837	0.661	9.18554e-96
CYTIP	6.44841e-100	0.330356	0.406	0.136	1.10551e-95
EXOSC8	7.26852e-100	0.296467	0.305	0.068	1.24611e-95
SAR1A	7.56242e-100	0.282053	0.321	0.077	1.2965e-95
HIGD1A	1.21729e-99	0.254268	0.275	0.051	2.08693e-95
TMED2	1.42954e-99	0.273967	0.316	0.073	2.4508e-95
APOA1BP	2.78986e-99	0.25012	0.289	0.059	4.78294e-95
DNMT1	3.82299e-99	0.295332	0.318	0.078	6.55414e-95
NONO	4.90422e-99	0.272094	0.322	0.078	8.4078e-95
SNRNP27	6.48159e-99	0.286362	0.322	0.079	1.1112e-94
HNRNPH1	7.54478e-99	0.445396	0.48	0.207	1.29348e-94
PMVK	7.69589e-99	0.253264	0.262	0.046	1.31938e-94
RPA2	1.04851e-98	0.307895	0.329	0.085	1.79756e-94
EIF3E	1.16573e-98	0.351285	0.559	0.28	1.99854e-94
AUP1	2.29064e-98	0.286735	0.314	0.075	3.92707e-94
DDX46	2.50413e-98	0.313246	0.4	0.133	4.29308e-94
RABAC1	2.6513e-98	0.297294	0.47	0.185	4.54539e-94
LLPH	3.01296e-98	0.258671	0.277	0.054	5.16542e-94
CAMTA1	3.33892e-98	0.267876	0.329	0.083	5.72424e-94
IMP3	4.45997e-98	0.313507	0.374	0.114	7.64618e-94
ETFA	7.00028e-98	0.254986	0.27	0.05	1.20013e-93
C12orf57	3.88261e-97	0.315977	0.482	0.201	6.65634e-93
CHCHD7	4.05201e-97	0.262209	0.3	0.067	6.94676e-93
CAPZA1	5.10152e-97	0.306758	0.335	0.089	8.74604e-93
STRAP	5.63082e-97	0.270112	0.287	0.061	9.65347e-93
PRKDC	5.67158e-97	0.28505	0.31	0.074	9.72335e-93
PRPF40A	5.83263e-97	0.28508	0.31	0.074	9.99946e-93
PAPOLA	9.32999e-97	0.261169	0.334	0.087	1.59953e-92
MT-ND3	1.40332e-96	0.348878	0.921	0.849	2.40586e-92
EIF3L	2.25105e-96	0.316231	0.472	0.194	3.85921e-92
TMEM14B	4.37403e-96	0.299442	0.384	0.125	7.49883e-92
DCXR	5.14674e-96	0.268794	0.306	0.072	8.82358e-92
ZNHIT1	5.76353e-96	0.294239	0.366	0.111	9.881e-92
UBE2V1	6.25698e-96	0.256873	0.296	0.066	1.0727e-91
PRPF4B	6.99812e-96	0.269691	0.323	0.081	1.19976e-91
RAP1B	7.67857e-96	0.280184	0.326	0.084	1.31641e-91
SDHC	1.48178e-95	0.274507	0.34	0.093	2.54037e-91
FARSA	2.08704e-95	0.260528	0.279	0.057	3.57802e-91
2020-09-15	2.29431e-95	0.29036	0.389	0.127	3.93337e-91
TMEM160	3.74765e-95	0.280758	0.37	0.115	6.42497e-91
KRT10	4.51277e-95	0.359072	0.467	0.196	7.7367e-91
SEC62	4.57538e-95	0.327304	0.557	0.276	7.84404e-91
TRMT10C	4.79923e-95	0.275932	0.282	0.06	8.22781e-91
PIN1	5.89877e-95	0.258621	0.326	0.084	1.01129e-90
LMNA	6.34067e-95	0.28658	0.211	0.024	1.08704e-90
EIF3H	8.09644e-95	0.324501	0.544	0.266	1.38805e-90
CHCHD1	1.04558e-94	0.253912	0.27	0.053	1.79254e-90
JUNB	1.22046e-94	0.374073	0.464	0.189	2.09235e-90
DDX27	1.22839e-94	0.276852	0.302	0.071	2.10595e-90
C19orf48	1.26225e-94	0.282352	0.245	0.04	2.164e-90
EWSR1	1.2711e-94	0.256788	0.335	0.09	2.17917e-90
EIF3D	1.28016e-94	0.313857	0.418	0.15	2.1947e-90
SMC3	1.3963e-94	0.268035	0.325	0.085	2.39382e-90
G3BP1	1.44123e-94	0.274302	0.331	0.089	2.47084e-90
RPF1	1.5611e-94	0.280918	0.318	0.081	2.67635e-90
SUMO3	1.98692e-94	0.263705	0.327	0.086	3.40638e-90
RNF126	2.39441e-94	0.270139	0.279	0.058	4.10498e-90
DNAJB6	3.2678e-94	0.275585	0.359	0.107	5.60231e-90
IFNG	3.60926e-94	1.68714	0.497	0.233	6.18771e-90
RAP1A	4.99855e-94	0.291734	0.349	0.101	8.56952e-90
LAT	5.0374e-94	0.310461	0.408	0.144	8.63613e-90
KHDRBS1	5.75635e-94	0.274019	0.362	0.109	9.86869e-90
PYURF	6.61334e-94	0.292435	0.374	0.119	1.13379e-89
SNHG8	7.52324e-94	0.381315	0.511	0.237	1.28978e-89
CCL3	1.25558e-93	0.797131	0.578	0.314	2.15257e-89
C11orf73	1.75097e-93	0.25844	0.285	0.062	3.00186e-89
CORO1B	2.35138e-93	0.334522	0.304	0.074	4.0312e-89
SSR3	2.55541e-93	0.283683	0.327	0.087	4.381e-89
BCLAF1	3.27007e-93	0.27918	0.354	0.104	5.60621e-89
PDCD6	3.31694e-93	0.281964	0.362	0.112	5.68657e-89
HNRNPR	4.99e-93	0.282439	0.329	0.09	8.55486e-89
DNAJC7	5.58113e-93	0.290725	0.345	0.099	9.56828e-89
BCAP31	1.91642e-92	0.260834	0.337	0.094	3.2855e-88
NDUFV1	3.70864e-92	0.257799	0.304	0.074	6.35809e-88
DENR	5.71411e-92	0.25535	0.291	0.067	9.79626e-88
SMIM4	6.48777e-92	0.268325	0.282	0.062	1.11226e-87
HNRNPH3	7.16039e-92	0.267031	0.283	0.063	1.22758e-87
SLBP	1.79488e-91	0.272002	0.273	0.058	3.07714e-87
C4orf3	3.08792e-91	0.301482	0.537	0.255	5.29393e-87
TKT	3.4651e-91	0.263605	0.275	0.059	5.94057e-87
HAX1	3.59456e-91	0.264114	0.326	0.089	6.16251e-87
CAPZB	5.04471e-91	0.28878	0.43	0.162	8.64864e-87
MRPS33	5.10947e-91	0.298181	0.329	0.092	8.75968e-87
TPR	5.41877e-91	0.302203	0.411	0.15	9.28995e-87
MMADHC	5.89078e-91	0.25135	0.287	0.065	1.00991e-86
UBXN4	9.10645e-91	0.303551	0.416	0.155	1.56121e-86
DYNLRB1	1.49871e-90	0.267817	0.344	0.101	2.56938e-86
CD81	1.76646e-90	0.250594	0.278	0.061	3.02842e-86
BATF3	3.49944e-90	0.284945	0.206	0.025	5.99944e-86
NSRP1	3.77068e-90	0.265045	0.328	0.09	6.46445e-86
LTB	4.18059e-90	0.682405	0.863	0.763	7.1672e-86
LSM10	8.12036e-90	0.257542	0.276	0.061	1.39215e-85
CHORDC1	1.09371e-89	0.254596	0.254	0.049	1.87506e-85
RNASEK	3.14912e-89	0.297322	0.423	0.161	5.39885e-85
SYF2	5.15312e-89	0.309045	0.508	0.235	8.83451e-85
NAP1L4	7.39122e-89	0.287248	0.401	0.145	1.26715e-84
SP100	2.5125e-88	0.27261	0.393	0.138	4.30743e-84
TMEM173	2.76996e-88	0.281825	0.267	0.057	4.74882e-84
RGS16	4.10754e-88	0.384716	0.2	0.024	7.04196e-84
NAA38	7.84367e-88	0.295812	0.374	0.127	1.34472e-83
RNF7	1.37687e-87	0.258376	0.322	0.09	2.3605e-83
TOMM7	1.44224e-87	0.355571	0.786	0.65	2.47257e-83
ANXA7	2.98033e-87	0.269383	0.331	0.097	5.10948e-83
POLR1D	3.81596e-87	0.28415	0.358	0.116	6.54208e-83
EIF3F	3.98969e-87	0.334879	0.561	0.295	6.83993e-83
SOD2	1.04074e-86	0.293624	0.445	0.181	1.78424e-82
CDC26	1.3374e-86	0.291392	0.346	0.11	2.29283e-82
TCEA1	1.98679e-86	0.266275	0.328	0.096	3.40615e-82
SSR2	2.13123e-86	0.334185	0.539	0.273	3.65379e-82
RUVBL1	2.59916e-86	0.256864	0.244	0.047	4.456e-82
MYC	3.53353e-86	0.358317	0.349	0.113	6.05789e-82
TAX1BP1	7.1686e-86	0.250644	0.382	0.131	1.22898e-81
MT2A	2.46664e-85	0.541406	0.55	0.293	4.22881e-81
RSRC2	4.42465e-85	0.300808	0.395	0.145	7.58561e-81
HIGD2A	5.60075e-85	0.303029	0.455	0.196	9.60193e-81
APOBEC3G	7.16261e-85	0.256808	0.244	0.048	1.22796e-80
CLNS1A	9.78434e-85	0.26577	0.343	0.106	1.67743e-80
AP2M1	1.40924e-84	0.260838	0.331	0.099	2.416e-80
UPF2	1.46777e-84	0.27907	0.43	0.175	2.51635e-80
MESDC2	2.81552e-84	0.256064	0.316	0.09	4.82693e-80
ARL6IP4	5.49316e-84	0.32511	0.493	0.234	9.41747e-80
MZT2A	9.50077e-84	0.284734	0.399	0.15	1.62881e-79
CLEC2D	1.76369e-83	0.25143	0.325	0.096	3.02368e-79
CIRBP	3.77351e-83	0.327294	0.565	0.308	6.46931e-79
DDOST	8.83993e-83	0.251474	0.303	0.083	1.51552e-78
COPS6	1.21612e-82	0.265893	0.344	0.11	2.08491e-78
BEST1	2.84514e-82	0.298669	0.449	0.194	4.8777e-78
RTF1	4.096e-82	0.26957	0.392	0.145	7.02218e-78
RPS17L	7.95267e-82	0.253985	0.296	0.08	1.36341e-77
SRSF11	8.96677e-82	0.298775	0.397	0.152	1.53726e-77
DDT	1.06353e-81	0.272604	0.36	0.122	1.82331e-77
AIP	1.81179e-81	0.252614	0.302	0.084	3.10613e-77
CCDC59	2.83746e-81	0.264283	0.308	0.089	4.86454e-77
EZR	3.12413e-81	0.265503	0.374	0.131	5.35601e-77
FKBP11	5.13957e-81	0.339922	0.377	0.14	8.81127e-77
TSR3	1.51032e-80	0.260134	0.283	0.074	2.58929e-76
DGUOK	1.51642e-80	0.27115	0.363	0.128	2.59975e-76
UFC1	2.98776e-80	0.280013	0.415	0.169	5.12221e-76
SAT1	6.28911e-80	0.33403	0.482	0.229	1.07821e-75
RPS27L	7.1797e-80	0.34698	0.468	0.218	1.23089e-75
CKLF	1.0178e-79	0.309879	0.38	0.144	1.74492e-75
PTP4A2	1.87404e-78	0.291788	0.41	0.169	3.21286e-74
LSMD1	1.51833e-77	0.252961	0.345	0.116	2.60302e-73
MED10	2.36425e-77	0.261444	0.333	0.11	4.05326e-73
GPR171	2.57974e-77	0.266997	0.274	0.072	4.42271e-73
CCL4	1.35028e-75	0.565433	0.496	0.248	2.31492e-71
CD99	2.71167e-75	0.314672	0.411	0.175	4.64889e-71
BLOC1S1	3.49871e-75	0.251534	0.364	0.134	5.99819e-71
TNFRSF25	3.60921e-75	0.284846	0.28	0.078	6.18764e-71
RP11-386G11.10	2.01048e-73	0.259885	0.415	0.174	3.44677e-69
LINC00493	2.91793e-73	0.268111	0.386	0.154	5.0025e-69
ORMDL1	1.88801e-72	0.253433	0.316	0.104	3.23681e-68
CD48	4.24637e-72	0.391435	0.4	0.174	7.27999e-68
SSU72	1.02123e-71	0.279012	0.387	0.158	1.75079e-67
CTSB	1.35514e-71	0.250488	0.382	0.151	2.32326e-67
C9orf78	3.37328e-71	0.253746	0.356	0.133	5.78315e-67
TMBIM4	4.47876e-71	0.251104	0.389	0.16	7.67838e-67
IK	6.73449e-71	0.264385	0.389	0.161	1.15456e-66
ZFAS1	1.9741e-67	0.37441	0.573	0.359	3.38441e-63
S100A10	6.24995e-67	0.322425	0.553	0.329	1.07149e-62
CCR7	1.00694e-66	0.274764	0.473	0.244	1.7263e-62
LAMTOR4	1.46103e-66	0.295654	0.474	0.251	2.50479e-62
CCL20	9.16429e-65	0.910404	0.176	0.031	1.57113e-60
LGALS1	1.04473e-64	0.434802	0.34	0.133	1.79109e-60
MRPL34	8.40169e-63	0.251264	0.279	0.093	1.44039e-58
UCP2	6.49398e-62	0.309994	0.316	0.122	1.11333e-57
COX14	1.08606e-61	0.258522	0.362	0.155	1.86194e-57
EID1	2.65774e-60	0.28786	0.387	0.18	4.55642e-56
PTPRCAP	4.4262e-60	0.294442	0.644	0.445	7.58828e-56
ARGLU1	8.26163e-60	0.257571	0.4	0.187	1.41637e-55
SNHG9	4.91876e-59	0.252463	0.362	0.158	8.43272e-55
CD44	1.08713e-58	0.280141	0.476	0.263	1.86378e-54
UBXN1	1.53787e-56	0.254741	0.439	0.229	2.63652e-52
PABPC1	3.91375e-54	0.258475	0.827	0.725	6.70974e-50
SVIP	9.60482e-54	0.255772	0.411	0.211	1.64665e-49
NEAT1	1.27195e-52	0.275138	0.605	0.406	2.18063e-48
TNFSF10	1.0532e-51	0.260738	0.233	0.075	1.8056e-47
LYAR	1.12624e-51	0.323737	0.369	0.179	1.93082e-47
DEK	6.48354e-48	0.255717	0.318	0.144	1.11154e-43
HIST1H4C	7.00671e-45	0.332753	0.373	0.201	1.20123e-40
RGCC	4.20358e-38	0.261789	0.303	0.15	7.20662e-34
IL10	5.09705e-36	0.311049	0.092	0.013	8.73838e-32
CSF2	8.87508e-34	0.638194	0.101	0.019	1.52154e-29
IL17F	1.61446e-23	0.904541	0.128	0.045	2.76783e-19
IL13	1.49043e-22	0.268794	0.049	0.005	2.55519e-18
RPS4Y1	1.03284e-12	0.271734	0.39	0.316	1.7707e-08
IL9	1.21506e-10	0.645869	0.049	0.016	2.0831e-06
S100A4	5.69091e-09	0.306973	0.509	0.45	9.7565e-05
IL5	1.51288e-06	0.427407	0.027	0.008	0.0259368
