# Supplementary material for: Single Cell Analysis of Blood Mononuclear Cells Stimulated Through Either LPS or Anti-CD3 and Anti-CD28
Source: Front Immunol. 2021 Mar 17;12:636720. doi: 10.3389/fimmu.2021.636720 (PMC8010670; doi:10.3389/fimmu.2021.636720)
Supplement: Supplementary file 6 [file Table_6.XLSX]

## Sheet: Legend
Table S6: Pathway enrichment analyses for monocyte responses to LPS. GO BP = gene ontology biological processes. KEGG = Kyoto encyclopedia of genes and genomes.

## Sheet: KEGG
group	ID	Description	GeneRatio	BgRatio	pvalue	p.adjust	qvalue	geneID	Count	Symbol
LPS Induced	hsa04061	Viral protein interaction with cytokine and cytokine receptor	18/89	100/7946	1.88689e-17	3.13223e-15	2.50261e-15	2919/6374/2921/6348/2920/7133/6349/6354/6347/6351/3569/414062/5473/9560/6372/11009/6364/6355	18	CXCL1, CXCL5, CXCL3, CCL3, CXCL2, TNFRSF1B, CCL3L1, CCL7, CCL2, CCL4, IL6, CCL3L3, PPBP, CCL4L2, CXCL6, IL24, CCL20, CCL8
LPS Induced	hsa04657	IL-17 signaling pathway	16/89	94/7946	3.44769e-15	2.86158e-13	2.28636e-13	2919/3553/6374/2921/6280/2920/6279/6354/6347/3569/4792/1051/5743/6372/4318/6364	16	CXCL1, IL1B, CXCL5, CXCL3, S100A9, CXCL2, S100A8, CCL7, CCL2, IL6, NFKBIA, CEBPB, PTGS2, CXCL6, MMP9, CCL20
LPS Induced	hsa04668	TNF signaling pathway	16/89	112/7946	6.1053e-14	3.37826e-12	2.69918e-12	2919/3553/6374/2921/4323/2920/7133/9021/6347/3569/4792/1051/5743/6372/4318/6364	16	CXCL1, IL1B, CXCL5, CXCL3, MMP14, CXCL2, TNFRSF1B, SOCS3, CCL2, IL6, NFKBIA, CEBPB, PTGS2, CXCL6, MMP9, CCL20
LPS Induced	hsa04062	Chemokine signaling pathway	18/89	189/7946	1.83153e-12	7.60083e-11	6.07295e-11	2919/6374/2921/6348/2920/6349/6354/6347/6351/4792/414062/3055/5473/4067/9560/6372/6364/6355	18	CXCL1, CXCL5, CXCL3, CCL3, CXCL2, CCL3L1, CCL7, CCL2, CCL4, NFKBIA, CCL3L3, HCK, PPBP, LYN, CCL4L2, CXCL6, CCL20, CCL8
LPS Induced	hsa04060	Cytokine-cytokine receptor interaction	21/89	294/7946	5.64875e-12	1.87539e-10	1.49841e-10	2919/3553/6374/2921/6348/2920/7133/6349/6354/6347/6351/3569/3575/3557/414062/5473/9560/6372/11009/6364/6355	21	CXCL1, IL1B, CXCL5, CXCL3, CCL3, CXCL2, TNFRSF1B, CCL3L1, CCL7, CCL2, CCL4, IL6, IL7R, IL1RN, CCL3L3, PPBP, CCL4L2, CXCL6, IL24, CCL20, CCL8
LPS Induced	hsa05323	Rheumatoid arthritis	13/89	93/7946	2.22596e-11	6.1585e-10	4.92055e-10	2919/3553/6374/1514/2921/6348/2920/6349/6347/3569/414062/6372/6364	13	CXCL1, IL1B, CXCL5, CTSL, CXCL3, CCL3, CXCL2, CCL3L1, CCL2, IL6, CCL3L3, CXCL6, CCL20
LPS Induced	hsa05132	Salmonella infection	1989-11-01	80/7946	1.03184e-09	2.44692e-08	1.95506e-08	2919/3553/2921/6348/929/2920/6349/6351/3569/414062/9560	11	CXCL1, IL1B, CXCL3, CCL3, CD14, CXCL2, CCL3L1, CCL4, IL6, CCL3L3, CCL4L2
LPS Induced	hsa04064	NF-kappa B signaling pathway	1989-11-01	102/7946	1.43654e-08	2.98082e-07	2.38163e-07	2919/3553/2921/929/2920/597/6351/4792/4067/5743/9560	11	CXCL1, IL1B, CXCL3, CD14, CXCL2, BCL2A1, CCL4, NFKBIA, LYN, PTGS2, CCL4L2
LPS Induced	hsa04978	Mineral absorption	1989-08-01	58/7946	2.18557e-07	4.03116e-06	3.22083e-06	4502/4494/4501/2495/4499/4495/4493/4496	8	MT2A, MT1F, MT1X, FTH1, MT1M, MT1G, MT1E, MT1H
LPS Induced	hsa04620	Toll-like receptor signaling pathway	1989-09-01	104/7946	2.1196e-06	3.51854e-05	2.81126e-05	3553/6348/929/6349/6351/3569/4792/414062/9560	9	IL1B, CCL3, CD14, CCL3L1, CCL4, IL6, NFKBIA, CCL3L3, CCL4L2
LPS Induced	hsa05134	Legionellosis	1989-07-01	57/7946	2.92451e-06	4.41335e-05	3.5262e-05	2919/3553/2921/929/2920/3569/4792	7	CXCL1, IL1B, CXCL3, CD14, CXCL2, IL6, NFKBIA
LPS Induced	hsa04216	Ferroptosis	1989-06-01	40/7946	4.7092e-06	6.51439e-05	5.2049e-05	2495/84557/23657/2180/64116/6520	6	FTH1, MAP1LC3A, SLC7A11, ACSL1, SLC39A8, SLC3A2
LPS Induced	hsa04621	NOD-like receptor signaling pathway	1989-10-01	181/7946	3.14175e-05	0.000401177	0.000320534	2919/3553/10135/2921/2920/6347/3569/4792/7295/1508	10	CXCL1, IL1B, NAMPT, CXCL3, CXCL2, CCL2, IL6, NFKBIA, TXN, CTSB
LPS Induced	hsa05142	Chagas disease (American trypanosomiasis)	1989-07-01	102/7946	0.00013594	0.00161186	0.00128786	3553/6348/6349/6347/3569/4792/414062	7	IL1B, CCL3, CCL3L1, CCL2, IL6, NFKBIA, CCL3L3
LPS Induced	hsa05163	Human cytomegalovirus infection	1989-10-01	225/7946	0.000194727	0.00215498	0.0017218	3553/6348/6349/6347/6351/3569/4792/414062/5743/9560	10	IL1B, CCL3, CCL3L1, CCL2, CCL4, IL6, NFKBIA, CCL3L3, PTGS2, CCL4L2
LPS Induced	hsa05167	Kaposi sarcoma-associated herpesvirus infection	1989-09-01	186/7946	0.000220216	0.00228474	0.00182548	2919/2921/2920/3569/3091/4792/3055/4067/5743	9	CXCL1, CXCL3, CXCL2, IL6, HIF1A, NFKBIA, HCK, LYN, PTGS2
LPS Induced	hsa04623	Cytosolic DNA-sensing pathway	1989-05-01	63/7946	0.000663705	0.00648089	0.00517813	3553/6351/3569/4792/9560	5	IL1B, CCL4, IL6, NFKBIA, CCL4L2
LPS Induced	hsa04640	Hematopoietic cell lineage	1989-06-01	99/7946	0.000810865	0.00747798	0.0059748	3553/960/929/3569/3575/966	6	IL1B, CD44, CD14, IL6, IL7R, CD59
LPS Induced	hsa05146	Amoebiasis	1989-06-01	102/7946	0.000948702	0.00828866	0.00662252	2919/3553/2921/929/2920/3569	6	CXCL1, IL1B, CXCL3, CD14, CXCL2, IL6
LPS Induced	hsa04625	C-type lectin receptor signaling pathway	1989-06-01	104/7946	0.00105017	0.00849625	0.00678838	3553/2207/3569/4792/26253/5743	6	IL1B, FCER1G, IL6, NFKBIA, CLEC4E, PTGS2
LPS Induced	hsa05120	Epithelial cell signaling in Helicobacter pylori infection	1989-05-01	70/7946	0.00107483	0.00849625	0.00678838	2919/2921/2920/4792/4067	5	CXCL1, CXCL3, CXCL2, NFKBIA, LYN
LPS Induced	hsa05133	Pertussis	1989-05-01	76/7946	0.00155673	0.0117463	0.00938508	3553/6374/929/3569/6372	5	IL1B, CXCL5, CD14, IL6, CXCL6
LPS Induced	hsa05418	Fluid shear stress and atherosclerosis	1989-06-01	139/7946	0.00455249	0.0328571	0.0262524	3553/1514/6347/9446/7295/4318	6	IL1B, CTSL, CCL2, GSTO1, TXN, MMP9
LPS Induced	hsa04920	Adipocytokine signaling pathway	1989-04-01	69/7946	0.00730768	0.0490197	0.039166	7133/9021/4792/2180	4	TNFRSF1B, SOCS3, NFKBIA, ACSL1
LPS Induced	hsa04066	HIF-1 signaling pathway	1989-05-01	109/7946	0.00738248	0.0490197	0.039166	3569/3091/5209/2597/7076	5	IL6, HIF1A, PFKFB3, GAPDH, TIMP1
LPS Reduced	hsa03010	Ribosome	28/66	153/7946	1.32859e-31	1.87331e-29	1.53837e-29	6171/6173/6136/6144/6232/6157/6164/6154/6229/4736/11224/6181/6207/6161/6187/6208/6142/6176/6228/6222/6202/6137/6206/6170/6146/6147/6205/6139	28	RPL41, RPL36A, RPL12, RPL21, RPS27, RPL27A, RPL34, RPL26, RPS24, RPL10A, RPL35, RPLP2, RPS13, RPL32, RPS2, RPS14, RPL18A, RPLP1, RPS23, RPS18, RPS8, RPL13, RPS12, RPL39, RPL22, RPL23A, RPS11, RPL17
LPS Reduced	hsa04612	Antigen processing and presentation	1966-12-01	78/7946	1.07416e-12	7.57283e-11	6.21882e-11	3122/3123/972/1520/3115/3108/3113/3127/3109/3119/3117/5641	12	HLA-DRA, HLA-DRB1, CD74, CTSS, HLA-DPB1, HLA-DMA, HLA-DPA1, HLA-DRB5, HLA-DMB, HLA-DQB1, HLA-DQA1, LGMN
LPS Reduced	hsa05310	Asthma	1966-09-01	31/7946	1.86753e-12	8.77739e-11	7.20801e-11	3122/3123/3115/3108/3113/3127/3109/3119/3117	9	HLA-DRA, HLA-DRB1, HLA-DPB1, HLA-DMA, HLA-DPA1, HLA-DRB5, HLA-DMB, HLA-DQB1, HLA-DQA1
LPS Reduced	hsa05330	Allograft rejection	1966-09-01	38/7946	1.44297e-11	5.08647e-10	4.17702e-10	3122/3123/3115/3108/3113/3127/3109/3119/3117	9	HLA-DRA, HLA-DRB1, HLA-DPB1, HLA-DMA, HLA-DPA1, HLA-DRB5, HLA-DMB, HLA-DQB1, HLA-DQA1
LPS Reduced	hsa05140	Leishmaniasis	1966-11-01	77/7946	2.37319e-11	6.69238e-10	5.4958e-10	3122/3123/3115/3108/2353/3113/3127/3109/1536/3119/3117	11	HLA-DRA, HLA-DRB1, HLA-DPB1, HLA-DMA, FOS, HLA-DPA1, HLA-DRB5, HLA-DMB, CYBB, HLA-DQB1, HLA-DQA1
LPS Reduced	hsa05332	Graft-versus-host disease	1966-09-01	41/7946	3.04139e-11	7.14728e-10	5.86936e-10	3122/3123/3115/3108/3113/3127/3109/3119/3117	9	HLA-DRA, HLA-DRB1, HLA-DPB1, HLA-DMA, HLA-DPA1, HLA-DRB5, HLA-DMB, HLA-DQB1, HLA-DQA1
LPS Reduced	hsa04940	Type I diabetes mellitus	1966-09-01	43/7946	4.83233e-11	9.73369e-10	7.99333e-10	3122/3123/3115/3108/3113/3127/3109/3119/3117	9	HLA-DRA, HLA-DRB1, HLA-DPB1, HLA-DMA, HLA-DPA1, HLA-DRB5, HLA-DMB, HLA-DQB1, HLA-DQA1
LPS Reduced	hsa04672	Intestinal immune network for IgA production	1966-09-01	49/7946	1.6932e-10	2.98426e-09	2.45068e-09	3122/3123/3115/3108/3113/3127/3109/3119/3117	9	HLA-DRA, HLA-DRB1, HLA-DPB1, HLA-DMA, HLA-DPA1, HLA-DRB5, HLA-DMB, HLA-DQB1, HLA-DQA1
LPS Reduced	hsa05323	Rheumatoid arthritis	1966-11-01	93/7946	1.9543e-10	3.06174e-09	2.5143e-09	3122/3123/3115/3108/2353/3113/3127/3109/3119/54/3117	11	HLA-DRA, HLA-DRB1, HLA-DPB1, HLA-DMA, FOS, HLA-DPA1, HLA-DRB5, HLA-DMB, HLA-DQB1, ACP5, HLA-DQA1
LPS Reduced	hsa04145	Phagosome	13/66	152/7946	2.3435e-10	3.30433e-09	2.71352e-09	3122/3123/1520/3115/3108/3113/3127/948/3109/1536/3119/64581/3117	13	HLA-DRA, HLA-DRB1, CTSS, HLA-DPB1, HLA-DMA, HLA-DPA1, HLA-DRB5, CD36, HLA-DMB, CYBB, HLA-DQB1, CLEC7A, HLA-DQA1
LPS Reduced	hsa05320	Autoimmune thyroid disease	1966-09-01	53/7946	3.55866e-10	4.56156e-09	3.74596e-09	3122/3123/3115/3108/3113/3127/3109/3119/3117	9	HLA-DRA, HLA-DRB1, HLA-DPB1, HLA-DMA, HLA-DPA1, HLA-DRB5, HLA-DMB, HLA-DQB1, HLA-DQA1
LPS Reduced	hsa05416	Viral myocarditis	1966-09-01	60/7946	1.13432e-09	1.33282e-08	1.09452e-08	3122/3123/3115/3108/3113/3127/3109/3119/3117	9	HLA-DRA, HLA-DRB1, HLA-DPB1, HLA-DMA, HLA-DPA1, HLA-DRB5, HLA-DMB, HLA-DQB1, HLA-DQA1
LPS Reduced	hsa05152	Tuberculosis	13/66	180/7946	1.92451e-09	2.08735e-08	1.71413e-08	3122/3123/972/1520/3115/3108/805/3113/3127/3109/3119/64581/3117	13	HLA-DRA, HLA-DRB1, CD74, CTSS, HLA-DPB1, HLA-DMA, CALM2, HLA-DPA1, HLA-DRB5, HLA-DMB, HLA-DQB1, CLEC7A, HLA-DQA1
LPS Reduced	hsa05321	Inflammatory bowel disease (IBD)	1966-09-01	65/7946	2.37439e-09	2.39135e-08	1.96378e-08	3122/3123/3115/3108/3113/3127/3109/3119/3117	9	HLA-DRA, HLA-DRB1, HLA-DPB1, HLA-DMA, HLA-DPA1, HLA-DRB5, HLA-DMB, HLA-DQB1, HLA-DQA1
LPS Reduced	hsa04658	Th1 and Th2 cell differentiation	1966-10-01	92/7946	3.25994e-09	3.06435e-08	2.51645e-08	3122/3123/3115/3108/2353/3113/3127/3109/3119/3117	10	HLA-DRA, HLA-DRB1, HLA-DPB1, HLA-DMA, FOS, HLA-DPA1, HLA-DRB5, HLA-DMB, HLA-DQB1, HLA-DQA1
LPS Reduced	hsa05150	Staphylococcus aureus infection	1966-10-01	96/7946	4.96942e-09	4.3793e-08	3.59629e-08	3122/3123/3115/3108/3113/3127/3109/2359/3119/3117	10	HLA-DRA, HLA-DRB1, HLA-DPB1, HLA-DMA, HLA-DPA1, HLA-DRB5, HLA-DMB, FPR3, HLA-DQB1, HLA-DQA1
LPS Reduced	hsa04640	Hematopoietic cell lineage	1966-10-01	99/7946	6.7316e-09	5.58327e-08	4.58499e-08	3122/3123/3115/3108/3113/3127/948/3109/3119/3117	10	HLA-DRA, HLA-DRB1, HLA-DPB1, HLA-DMA, HLA-DPA1, HLA-DRB5, CD36, HLA-DMB, HLA-DQB1, HLA-DQA1
LPS Reduced	hsa04659	Th17 cell differentiation	1966-10-01	107/7946	1.44165e-08	1.12929e-07	9.27374e-08	3122/3123/3115/3108/2353/3113/3127/3109/3119/3117	10	HLA-DRA, HLA-DRB1, HLA-DPB1, HLA-DMA, FOS, HLA-DPA1, HLA-DRB5, HLA-DMB, HLA-DQB1, HLA-DQA1
LPS Reduced	hsa05145	Toxoplasmosis	1966-09-01	112/7946	3.00574e-07	2.23058e-06	1.83175e-06	3122/3123/3115/3108/3113/3127/3109/3119/3117	9	HLA-DRA, HLA-DRB1, HLA-DPB1, HLA-DMA, HLA-DPA1, HLA-DRB5, HLA-DMB, HLA-DQB1, HLA-DQA1
LPS Reduced	hsa05164	Influenza A	1966-10-01	170/7946	1.15682e-06	8.15558e-06	6.69738e-06	3122/3123/3115/3108/3113/3127/3109/29108/3119/3117	10	HLA-DRA, HLA-DRB1, HLA-DPB1, HLA-DMA, HLA-DPA1, HLA-DRB5, HLA-DMB, PYCARD, HLA-DQB1, HLA-DQA1
LPS Reduced	hsa05322	Systemic lupus erythematosus	1966-09-01	133/7946	1.29821e-06	8.71657e-06	7.15806e-06	3122/3123/3115/3108/3113/3127/3109/3119/3117	9	HLA-DRA, HLA-DRB1, HLA-DPB1, HLA-DMA, HLA-DPA1, HLA-DRB5, HLA-DMB, HLA-DQB1, HLA-DQA1
LPS Reduced	hsa04514	Cell adhesion molecules (CAMs)	1966-09-01	147/7946	2.99612e-06	1.92024e-05	1.57691e-05	3122/3123/3115/3108/3113/3127/3109/3119/3117	9	HLA-DRA, HLA-DRB1, HLA-DPB1, HLA-DMA, HLA-DPA1, HLA-DRB5, HLA-DMB, HLA-DQB1, HLA-DQA1
LPS Reduced	hsa05166	Human T-cell leukemia virus 1 infection	1966-10-01	219/7946	1.1258e-05	6.90164e-05	5.66764e-05	3122/3123/3115/3108/2353/3113/3127/3109/3119/3117	10	HLA-DRA, HLA-DRB1, HLA-DPB1, HLA-DMA, FOS, HLA-DPA1, HLA-DRB5, HLA-DMB, HLA-DQB1, HLA-DQA1
LPS Reduced	hsa05169	Epstein-Barr virus infection	1966-09-01	201/7946	3.76635e-05	0.000221273	0.00018171	3122/3123/3115/3108/3113/3127/3109/3119/3117	9	HLA-DRA, HLA-DRB1, HLA-DPB1, HLA-DMA, HLA-DPA1, HLA-DRB5, HLA-DMB, HLA-DQB1, HLA-DQA1
LPS Reduced	hsa04142	Lysosome	1966-06-01	123/7946	0.00051812	0.00292219	0.00239971	2517/1520/5660/54/1075/5641	6	FUCA1, CTSS, PSAP, ACP5, CTSC, LGMN
LPS Reduced	hsa05168	Herpes simplex virus 1 infection	1966-10-01	491/7946	0.00684571	0.0371248	0.0304869	3122/3123/972/3115/3108/3113/3127/3109/3119/3117	10	HLA-DRA, HLA-DRB1, CD74, HLA-DPB1, HLA-DMA, HLA-DPA1, HLA-DRB5, HLA-DMB, HLA-DQB1, HLA-DQA1

## Sheet: GO BP
group	ID	Description	GeneRatio	BgRatio	pvalue	p.adjust	qvalue	geneID	Count	Symbol
LPS Induced	GO:0005125	cytokine activity	12/111	154/16969	3.6921e-10	9.48869e-08	7.61738e-08	3553/10135/2921/6348/6354/6351/3569/3557/7076/10148/6372/11009	12	IL1B, NAMPT, CXCL3, CCL3, CCL7, CCL4, IL6, IL1RN, TIMP1, EBI3, CXCL6, IL24
LPS Induced	GO:0042379	chemokine receptor binding	7/111	47/16969	2.14582e-08	2.75739e-06	2.21359e-06	2921/6348/6354/6347/6351/6372/6364	7	CXCL3, CCL3, CCL7, CCL2, CCL4, CXCL6, CCL20
LPS Induced	GO:0048018	receptor ligand activity	15/111	397/16969	4.65822e-08	3.99055e-06	3.20355e-06	2919/3553/10135/2921/6348/56729/6354/6351/3569/3557/7076/5473/10148/6372/11009	15	CXCL1, IL1B, NAMPT, CXCL3, CCL3, RETN, CCL7, CCL4, IL6, IL1RN, TIMP1, PPBP, EBI3, CXCL6, IL24
LPS Induced	GO:0030545	receptor regulator activity	15/111	425/16969	1.13347e-07	7.28252e-06	5.8463e-06	2919/3553/10135/2921/6348/56729/6354/6351/3569/3557/7076/5473/10148/6372/11009	15	CXCL1, IL1B, NAMPT, CXCL3, CCL3, RETN, CCL7, CCL4, IL6, IL1RN, TIMP1, PPBP, EBI3, CXCL6, IL24
LPS Induced	GO:0050786	RAGE receptor binding	4/111	11/16969	5.5238e-07	2.76207e-05	2.21735e-05	6280/6279/6283/2357	4	S100A9, S100A8, S100A12, FPR1
LPS Induced	GO:0048020	CCR chemokine receptor binding	5/111	26/16969	6.44841e-07	2.76207e-05	2.21735e-05	6348/6354/6347/6351/6364	5	CCL3, CCL7, CCL2, CCL4, CCL20
LPS Induced	GO:0005126	cytokine receptor binding	10/111	210/16969	1.18202e-06	4.3397e-05	3.48384e-05	3553/2921/6348/6354/6347/6351/3569/3557/6372/6364	10	IL1B, CXCL3, CCL3, CCL7, CCL2, CCL4, IL6, IL1RN, CXCL6, CCL20
LPS Induced	GO:0001664	G protein-coupled receptor binding	9/111	205/16969	8.0214e-06	0.000257687	0.000206868	2921/6348/6354/6347/2357/6351/8685/6372/6364	9	CXCL3, CCL3, CCL7, CCL2, FPR1, CCL4, MARCO, CXCL6, CCL20
LPS Induced	GO:0008009	chemokine activity	4/111	30/16969	4.16796e-05	0.00119018	0.000955463	2921/6348/6354/6372	4	CXCL3, CCL3, CCL7, CXCL6
LPS Induced	GO:0015037	peptide disulfide oxidoreductase activity	3/111	12/16969	5.741e-05	0.00147544	0.00118446	9446/2745/7295	3	GSTO1, GLRX, TXN
LPS Induced	GO:0016209	antioxidant activity	5/111	65/16969	6.61109e-05	0.00154459	0.00123997	6648/6280/9446/7295/5743	5	SOD2, S100A9, GSTO1, TXN, PTGS2
LPS Induced	GO:0038187	pattern recognition receptor activity	3/111	18/16969	0.00020693	0.00443176	0.00355775	929/26253/8685	3	CD14, CLEC4E, MARCO
LPS Induced	GO:0005540	hyaluronic acid binding	3/111	20/16969	0.000286352	0.00566096	0.00454453	960/7130/1462	3	CD44, TNFAIP6, VCAN
LPS Induced	GO:0005518	collagen binding	4/111	61/16969	0.000679222	0.0124686	0.0100096	1514/960/1508/4318	4	CTSL, CD44, CTSB, MMP9
LPS Induced	GO:0070851	growth factor receptor binding	5/111	121/16969	0.00119105	0.0204067	0.0163822	3553/3569/2069/3557/4067	5	IL1B, IL6, EREG, IL1RN, LYN
LPS Induced	GO:0051219	phosphoprotein binding	4/111	76/16969	0.00154913	0.0236951	0.0190221	9021/3055/4067/64092	4	SOCS3, HCK, LYN, SAMSN1
LPS Induced	GO:0001784	phosphotyrosine residue binding	3/111	37/16969	0.00180024	0.0236951	0.0190221	9021/3055/64092	3	SOCS3, HCK, SAMSN1
LPS Induced	GO:0015036	disulfide oxidoreductase activity	3/111	37/16969	0.00180024	0.0236951	0.0190221	9446/2745/7295	3	GSTO1, GLRX, TXN
LPS Induced	GO:0099516	ion antiporter activity	3/111	37/16969	0.00180024	0.0236951	0.0190221	6556/23657/6520	3	SLC11A1, SLC7A11, SLC3A2
LPS Induced	GO:0035325	Toll-like receptor binding	2/111	10/16969	0.00184398	0.0236951	0.0190221	6280/6279	2	S100A9, S100A8
LPS Induced	GO:0005539	glycosaminoglycan binding	6/111	199/16969	0.00197013	0.0241107	0.0193557	960/6354/7130/1462/6372/6355	6	CD44, CCL7, TNFAIP6, VCAN, CXCL6, CCL8
LPS Induced	GO:0016004	phospholipase activator activity	2/111	11/16969	0.00224413	0.0262156	0.0210455	6348/6355	2	CCL3, CCL8
LPS Induced	GO:0005149	interleukin-1 receptor binding	2/111	12/16969	0.00268148	0.0299626	0.0240535	3553/3557	2	IL1B, IL1RN
LPS Induced	GO:0045309	protein phosphorylated amino acid binding	3/111	44/16969	0.00296845	0.0317872	0.0255183	9021/3055/64092	3	SOCS3, HCK, SAMSN1
LPS Induced	GO:0060229	lipase activator activity	2/111	13/16969	0.00315551	0.0324387	0.0260413	6348/6355	2	CCL3, CCL8
LPS Induced	GO:0036041	long-chain fatty acid binding	2/111	14/16969	0.00366575	0.0362086	0.0290677	6280/6279	2	S100A9, S100A8
LPS Induced	GO:0015297	antiporter activity	3/111	48/16969	0.00380402	0.0362086	0.0290677	6556/23657/6520	3	SLC11A1, SLC7A11, SLC3A2
LPS Induced	GO:0016667	oxidoreductase activity, acting on a sulfur group of donors	3/111	54/16969	0.00530293	0.0448411	0.0359978	9446/2745/7295	3	GSTO1, GLRX, TXN
LPS Induced	GO:0008329	signaling pattern recognition receptor activity	2/111	17/16969	0.00540885	0.0448411	0.0359978	929/8685	2	CD14, MARCO
LPS Induced	GO:0015491	cation:cation antiporter activity	2/111	17/16969	0.00540885	0.0448411	0.0359978	6556/6520	2	SLC11A1, SLC3A2
LPS Induced	GO:0098641	cadherin binding involved in cell-cell adhesion	2/111	17/16969	0.00540885	0.0448411	0.0359978	6282/301	2	S100A11, ANXA1
LPS Induced	GO:0031406	carboxylic acid binding	5/111	176/16969	0.00600276	0.0482097	0.038702	6280/960/6279/7130/1462	5	S100A9, CD44, S100A8, TNFAIP6, VCAN
LPS Induced	GO:0043177	organic acid binding	5/111	178/16969	0.00629109	0.0489943	0.0393319	6280/960/6279/7130/1462	5	S100A9, CD44, S100A8, TNFAIP6, VCAN
LPS Reduced	GO:0003735	structural constituent of ribosome	22/86	157/16969	4.07539e-26	7.86549e-24	6.04873e-24	6171/6173/6136/6144/6157/6164/6154/6229/4736/11224/6181/6161/6187/6142/6176/6228/6222/6137/6170/6146/6147/6139	22	RPL41, RPL36A, RPL12, RPL21, RPL27A, RPL34, RPL26, RPS24, RPL10A, RPL35, RPLP2, RPL32, RPS2, RPL18A, RPLP1, RPS23, RPS18, RPL13, RPL39, RPL22, RPL23A, RPL17
LPS Reduced	GO:0042605	peptide antigen binding	1986-07-01	30/16969	1.24039e-10	1.19698e-08	9.205e-09	3122/3123/3115/3113/3127/3119/3117	7	HLA-DRA, HLA-DRB1, HLA-DPB1, HLA-DPA1, HLA-DRB5, HLA-DQB1, HLA-DQA1
LPS Reduced	GO:0033218	amide binding	13/86	266/16969	8.09531e-10	4.07659e-08	3.13499e-08	3122/1471/3123/972/3115/3113/3127/2950/948/5660/3119/9445/3117	13	HLA-DRA, CST3, HLA-DRB1, CD74, HLA-DPB1, HLA-DPA1, HLA-DRB5, GSTP1, CD36, PSAP, HLA-DQB1, ITM2B, HLA-DQA1
LPS Reduced	GO:0042277	peptide binding	1986-12-01	215/16969	8.4489e-10	4.07659e-08	3.13499e-08	3122/1471/3123/972/3115/3113/3127/2950/948/3119/9445/3117	12	HLA-DRA, CST3, HLA-DRB1, CD74, HLA-DPB1, HLA-DPA1, HLA-DRB5, GSTP1, CD36, HLA-DQB1, ITM2B, HLA-DQA1
LPS Reduced	GO:0023026	MHC class II protein complex binding	1986-05-01	16/16969	1.24253e-08	4.79615e-07	3.68834e-07	3122/3123/972/3108/3109	5	HLA-DRA, HLA-DRB1, CD74, HLA-DMA, HLA-DMB
LPS Reduced	GO:0032395	MHC class II receptor activity	1986-04-01	10/16969	1.26162e-07	4.02025e-06	3.09166e-06	3122/3113/3119/3117	4	HLA-DRA, HLA-DPA1, HLA-DQB1, HLA-DQA1
LPS Reduced	GO:0023023	MHC protein complex binding	1986-05-01	25/16969	1.45812e-07	4.02025e-06	3.09166e-06	3122/3123/972/3108/3109	5	HLA-DRA, HLA-DRB1, CD74, HLA-DMA, HLA-DMB
LPS Reduced	GO:0048027	mRNA 5'-UTR binding	1986-04-01	23/16969	5.05889e-06	0.000122046	9.38558e-05	6171/6154/6207/6208	4	RPL41, RPL26, RPS13, RPS14
LPS Reduced	GO:0003823	antigen binding	1986-07-01	150/16969	1.09846e-05	0.00023556	0.00018115	3122/3123/3115/3113/3127/3119/3117	7	HLA-DRA, HLA-DRB1, HLA-DPB1, HLA-DPA1, HLA-DRB5, HLA-DQB1, HLA-DQA1
LPS Reduced	GO:0008329	signaling pattern recognition receptor activity	1986-03-01	17/16969	8.11882e-05	0.00156693	0.001205	2219/948/64581	3	FCN1, CD36, CLEC7A
LPS Reduced	GO:0038187	pattern recognition receptor activity	1986-03-01	18/16969	9.70694e-05	0.00170313	0.00130974	2219/948/64581	3	FCN1, CD36, CLEC7A
LPS Reduced	GO:0001540	amyloid-beta binding	1986-04-01	71/16969	0.000461326	0.00741965	0.00570587	1471/972/948/9445	4	CST3, CD74, CD36, ITM2B
LPS Reduced	GO:0016504	peptidase activator activity	1986-03-01	36/16969	0.000795228	0.0109628	0.00843061	29108/1075/2335	3	PYCARD, CTSC, FN1
LPS Reduced	GO:0043394	proteoglycan binding	1986-03-01	36/16969	0.000795228	0.0109628	0.00843061	1520/10457/2335	3	CTSS, GPNMB, FN1
LPS Reduced	GO:0019843	rRNA binding	1986-03-01	44/16969	0.00143264	0.0184333	0.0141756	6222/6147/6205	3	RPS18, RPL23A, RPS11
LPS Reduced	GO:0005041	low-density lipoprotein particle receptor activity	1986-02-01	12/16969	0.00162122	0.0195559	0.0150389	948/23166	2	CD36, STAB1
LPS Reduced	GO:0030228	lipoprotein particle receptor activity	1986-02-01	14/16969	0.00222064	0.0252108	0.0193876	948/23166	2	CD36, STAB1
LPS Reduced	GO:0030169	low-density lipoprotein particle binding	1986-02-01	15/16969	0.00255386	0.027383	0.0210581	948/23166	2	CD36, STAB1
LPS Reduced	GO:0004602	glutathione peroxidase activity	1986-02-01	16/16969	0.00290911	0.0295504	0.0227249	2876/2950	2	GPX1, GSTP1
LPS Reduced	GO:0002020	protease binding	1986-04-01	121/16969	0.00333036	0.032138	0.0247148	1471/5660/29108/2335	4	CST3, PSAP, PYCARD, FN1
LPS Reduced	GO:0005518	collagen binding	1986-03-01	61/16969	0.00365959	0.0336334	0.0258648	1520/7045/2335	3	CTSS, TGFBI, FN1
LPS Reduced	GO:0016505	peptidase activator activity involved in apoptotic process	1986-02-01	19/16969	0.00410479	0.0360102	0.0276926	29108/1075	2	PYCARD, CTSC
